# Supplementary material
Source: publisher figshare collection journal article supplement (https://acs.figshare.com/ndownloader/files/9476698)
Supplement: Supplementary file 1 [file 9476698]

data_150928_ran6_40_2_compound_3a
_audit_creation_date              2015-09-29
_audit_creation_method
;
Olex2 1.2
(compiled 2014.03.20 svn.r2914 for OlexSys, GUI svn.r4816)
;
_publ_contact_author_address      ?
_publ_contact_author_email        ?
_publ_contact_author_name         ''
_publ_contact_author_phone        ?
_publ_section_references
;
Dolomanov, O.V., Bourhis, L.J., Gildea, R.J, Howard, J.A.K. & Puschmann, H.
 (2009), J. Appl. Cryst. 42, 339-341.

Sheldrick, G.M. (2008). Acta Cryst. A64, 112-122.
;
_chemical_name_common             ?
_chemical_name_systematic
;
 ? 
;
_chemical_formula_moiety          'C24 H21 N O3 S, C H2 Cl2'
_chemical_formula_sum             'C25 H23 Cl2 N O3 S'
_chemical_formula_weight          488.40
_chemical_melting_point           ?
_chemical_oxdiff_formula          'c10 h10 n2 o8'
loop_
  _atom_type_symbol
  _atom_type_description
  _atom_type_scat_dispersion_real
  _atom_type_scat_dispersion_imag
  _atom_type_scat_source
 'C' 'C' 0.0181 0.0091 'International Tables Vol C Tables 4.2.6.8 and 6.1.1.4'
 'H' 'H' 0.0000 0.0000 'International Tables Vol C Tables 4.2.6.8 and 6.1.1.4'
 'Cl' 'Cl' 0.3639 0.7018 'International Tables Vol C Tables 4.2.6.8 and 6.1.1.4'
 'N' 'N' 0.0311 0.0180 'International Tables Vol C Tables 4.2.6.8 and 6.1.1.4'
 'O' 'O' 0.0492 0.0322 'International Tables Vol C Tables 4.2.6.8 and 6.1.1.4'
 'S' 'S' 0.3331 0.5567 'International Tables Vol C Tables 4.2.6.8 and 6.1.1.4'

_space_group_crystal_system       'triclinic'
_space_group_IT_number            2
_space_group_name_H-M_alt         'P -1'
_space_group_name_Hall            '-P 1'
loop_
  _space_group_symop_id
  _space_group_symop_operation_xyz
 1 'x, y, z'
 2 '-x, -y, -z'

_cell_length_a                    8.5868(3)
_cell_length_b                    9.9563(5)
_cell_length_c                    14.1824(6)
_cell_angle_alpha                 87.050(4)
_cell_angle_beta                  88.435(3)
_cell_angle_gamma                 89.106(4)
_cell_volume                      1210.30(9)
_cell_formula_units_Z             2
_cell_measurement_reflns_used     9056
_cell_measurement_temperature     293(2)
_cell_measurement_theta_max       67.3678
_cell_measurement_theta_min       3.1186
_exptl_absorpt_coefficient_mu     3.437
_exptl_absorpt_correction_T_max   1.00000
_exptl_absorpt_correction_T_min   0.32172
_exptl_absorpt_correction_type    multi-scan
_exptl_absorpt_process_details
;
CrysAlisPro, Agilent Technologies,
Version 1.171.35.11 (release 16-05-2011 CrysAlis171 .NET)
(compiled May 16 2011,17:55:39)
Empirical absorption correction using spherical harmonics,
 implemented in SCALE3 ABSPACK scaling algorithm.
;
_exptl_crystal_colour             colourless
_exptl_crystal_colour_primary     colourless
_exptl_crystal_density_diffrn     1.340
_exptl_crystal_density_meas       ?
_exptl_crystal_density_method     'not measured'
_exptl_crystal_description        plate
_exptl_crystal_F_000              508
_exptl_crystal_size_max           0.4
_exptl_crystal_size_mid           0.3
_exptl_crystal_size_min           0.2
_exptl_special_details
;
 ? 
;
_diffrn_reflns_av_R_equivalents   0.0477
_diffrn_reflns_av_unetI/netI      0.0242
_diffrn_reflns_limit_h_max        10
_diffrn_reflns_limit_h_min        -10
_diffrn_reflns_limit_k_max        11
_diffrn_reflns_limit_k_min        -11
_diffrn_reflns_limit_l_max        16
_diffrn_reflns_limit_l_min        -16
_diffrn_reflns_number             21870
_diffrn_reflns_theta_full         67.48
_diffrn_reflns_theta_max          67.48
_diffrn_reflns_theta_min          3.12
_diffrn_ambient_temperature       293.15
_diffrn_detector_area_resol_mean  10.3592
_diffrn_measured_fraction_theta_full 0.993
_diffrn_measured_fraction_theta_max 0.993
_diffrn_measurement_device_type   'Xcalibur, Atlas, Gemini ultra'
_diffrn_measurement_method        '\w scans'
_diffrn_orient_matrix_UB_11       0.0302671000
_diffrn_orient_matrix_UB_12       0.0612425000
_diffrn_orient_matrix_UB_13       -0.1006819000
_diffrn_orient_matrix_UB_21       -0.1764799000
_diffrn_orient_matrix_UB_22       0.0227432000
_diffrn_orient_matrix_UB_23       -0.0115095000
_diffrn_orient_matrix_UB_31       0.0125586000
_diffrn_orient_matrix_UB_32       0.1405092000
_diffrn_orient_matrix_UB_33       0.0396197000
_diffrn_radiation_monochromator   mirror
_diffrn_radiation_type            CuK\a
_diffrn_radiation_wavelength      1.54184
_diffrn_source                    'Enhance Ultra (Cu) X-ray Source'
_diffrn_standards_decay_%         ?
_diffrn_standards_interval_count  ?
_diffrn_standards_interval_time   ?
_diffrn_standards_number          ?
_reflns_number_gt                 3693
_reflns_number_total              4320
_reflns_odcompleteness_completeness 99.90
_reflns_odcompleteness_iscentric  1
_reflns_odcompleteness_theta      64.99
_reflns_threshold_expression      >2sigma(I)
_computing_cell_refinement
;
CrysAlisPro, Agilent Technologies,
Version 1.171.35.11 (release 16-05-2011 CrysAlis171 .NET)
(compiled May 16 2011,17:55:39)
;
_computing_data_collection
;
CrysAlisPro, Agilent Technologies,
Version 1.171.35.11 (release 16-05-2011 CrysAlis171 .NET)
(compiled May 16 2011,17:55:39)
;
_computing_data_reduction
;
CrysAlisPro, Agilent Technologies,
Version 1.171.35.11 (release 16-05-2011 CrysAlis171 .NET)
(compiled May 16 2011,17:55:39)
;
_computing_molecular_graphics     'Olex2 (Dolomanov et al., 2009)'
_computing_publication_material   'Olex2 (Dolomanov et al., 2009)'
_computing_structure_refinement   'ShelXL (Sheldrick, 2008)'
_computing_structure_solution     'ShelXS (Sheldrick, 2008)'
_refine_diff_density_max          0.918
_refine_diff_density_min          -0.728
_refine_diff_density_rms          0.066
_refine_ls_extinction_coef        ?
_refine_ls_extinction_method      none
_refine_ls_goodness_of_fit_ref    1.059
_refine_ls_hydrogen_treatment     constr
_refine_ls_matrix_type            full
_refine_ls_number_parameters      290
_refine_ls_number_reflns          4320
_refine_ls_number_restraints      0
_refine_ls_R_factor_all           0.0800
_refine_ls_R_factor_gt            0.0711
_refine_ls_restrained_S_all       1.059
_refine_ls_shift/su_max           0.001
_refine_ls_shift/su_mean          0.000
_refine_ls_structure_factor_coef  Fsqd
_refine_ls_weighting_details
'calc w=1/[\s^2^(Fo^2^)+(0.1166P)^2^+1.1460P] where P=(Fo^2^+2Fc^2^)/3'
_refine_ls_weighting_scheme       calc
_refine_ls_wR_factor_gt           0.2006
_refine_ls_wR_factor_ref          0.2114
_refine_special_details
;
 Refinement of F^2^ against ALL reflections.  The weighted R-factor wR and 
 goodness of fit S are based on F^2^, conventional R-factors R are based 
 on F, with F set to zero for negative F^2^. The threshold expression of 
 F^2^ > 2sigma(F^2^) is used only for calculating R-factors(gt) etc. and is 
 not relevant to the choice of reflections for refinement.  R-factors based 
 on F^2^ are statistically about twice as large as those based on F, and R- 
 factors based on ALL data will be even larger. 
;
_olex2_refinement_description
;
1. Fixed Uiso
 At 1.2 times of:
  All C(H) groups, All C(H,H) groups
 At 1.5 times of:
  All C(H,H,H) groups
2.a Ternary CH refined with riding coordinates:
 C11(H11)
2.b Secondary CH2 refined with riding coordinates:
 C7(H7A,H7B), C10(H10A,H10B), C25(H25A,H25B)
2.c Aromatic/amide H refined with riding coordinates:
 C1(H1), C2(H2), C3(H3), C4(H4), C13(H13), C14(H14), C15(H15), C16(H16),
 C17(H17), C19(H19), C20(H20), C22(H22), C23(H23)
2.d Idealised Me refined as rotating group:
 C24(H24A,H24B,H24C)
;
_atom_sites_solution_hydrogens    geom
_atom_sites_solution_primary      direct
_atom_sites_solution_secondary    difmap
loop_
  _atom_site_label
  _atom_site_type_symbol
  _atom_site_fract_x
  _atom_site_fract_y
  _atom_site_fract_z
  _atom_site_U_iso_or_equiv
  _atom_site_adp_type
  _atom_site_occupancy
  _atom_site_calc_flag
  _atom_site_disorder_assembly
  _atom_site_disorder_group
  _atom_site_refinement_flags_posn
 S1 S 0.34581(8) 0.39761(7) 0.63136(5) 0.0426(3) Uani 1 d . . .
 O1 O 0.1259(3) 0.3582(2) 0.49217(17) 0.0513(6) Uani 1 d . . .
 O2 O 0.3641(3) 0.5302(2) 0.58769(17) 0.0523(6) Uani 1 d . . .
 O3 O 0.2126(3) 0.3746(3) 0.69312(17) 0.0580(6) Uani 1 d . . .
 N1 N 0.3586(3) 0.2839(2) 0.55171(18) 0.0440(6) Uani 1 d . . .
 C1 C -0.1657(4) 0.1659(3) 0.3801(3) 0.0542(8) Uani 1 d . . .
 H1 H -0.2505 0.2248 0.3841 0.065 Uiso 1 calc . . R
 C2 C -0.1871(4) 0.0334(4) 0.3593(3) 0.0584(9) Uani 1 d . . .
 H2 H -0.2865 0.0035 0.3476 0.070 Uiso 1 calc . . R
 C3 C -0.0622(4) -0.0540(3) 0.3559(2) 0.0526(8) Uani 1 d . . .
 H3 H -0.0776 -0.1428 0.3414 0.063 Uiso 1 calc . . R
 C4 C 0.0867(4) -0.0115(3) 0.3739(2) 0.0467(7) Uani 1 d . . .
 H4 H 0.1701 -0.0723 0.3735 0.056 Uiso 1 calc . . R
 C5 C 0.1107(3) 0.1219(3) 0.3924(2) 0.0400(6) Uani 1 d . . .
 C6 C -0.0163(4) 0.2100(3) 0.3949(2) 0.0445(7) Uani 1 d . . .
 C7 C 0.0187(4) 0.3530(3) 0.4140(3) 0.0562(9) Uani 1 d . . .
 H7A H 0.0648 0.3973 0.3577 0.067 Uiso 1 calc . . R
 H7B H -0.0774 0.4004 0.4296 0.067 Uiso 1 calc . . R
 C8 C 0.2510(3) 0.2775(3) 0.4906(2) 0.0418(6) Uani 1 d . . .
 C9 C 0.2635(3) 0.1786(3) 0.4159(2) 0.0406(6) Uani 1 d . . .
 C10 C 0.4143(4) 0.1032(3) 0.4059(2) 0.0502(8) Uani 1 d . . .
 H10A H 0.4910 0.1138 0.4538 0.060 Uiso 1 calc . . R
 H10B H 0.4106 0.0135 0.3825 0.060 Uiso 1 calc . . R
 C11 C 0.3884(4) 0.2184(3) 0.3371(2) 0.0488(7) Uani 1 d . . .
 H11 H 0.4474 0.2986 0.3501 0.059 Uiso 1 calc . . R
 C12 C 0.3578(4) 0.2055(3) 0.2355(3) 0.0549(8) Uani 1 d . . .
 C13 C 0.3530(6) 0.0841(4) 0.1926(3) 0.0763(12) Uani 1 d . . .
 H13 H 0.3662 0.0042 0.2287 0.092 Uiso 1 calc . . R
 C14 C 0.3291(8) 0.0801(5) 0.0975(3) 0.0975(17) Uani 1 d . . .
 H14 H 0.3247 -0.0029 0.0705 0.117 Uiso 1 calc . . R
 C15 C 0.3116(8) 0.1939(6) 0.0422(3) 0.1042(18) Uani 1 d . . .
 H15 H 0.2961 0.1897 -0.0222 0.125 Uiso 1 calc . . R
 C16 C 0.3174(9) 0.3164(6) 0.0834(4) 0.112(2) Uani 1 d . . .
 H16 H 0.3072 0.3957 0.0464 0.134 Uiso 1 calc . . R
 C17 C 0.3382(7) 0.3215(5) 0.1785(3) 0.0837(13) Uani 1 d . . .
 H17 H 0.3392 0.4046 0.2055 0.100 Uiso 1 calc . . R
 C18 C 0.5148(3) 0.3566(3) 0.6954(2) 0.0421(7) Uani 1 d . . .
 C19 C 0.6603(4) 0.3672(3) 0.6503(2) 0.0452(7) Uani 1 d . . .
 H19 H 0.6689 0.3921 0.5863 0.054 Uiso 1 calc . . R
 C20 C 0.7926(4) 0.3401(3) 0.7026(2) 0.0497(7) Uani 1 d . . .
 H20 H 0.8903 0.3465 0.6730 0.060 Uiso 1 calc . . R
 C21 C 0.7814(4) 0.3036(3) 0.7982(2) 0.0535(8) Uani 1 d . . .
 C22 C 0.6347(4) 0.2957(4) 0.8412(3) 0.0613(9) Uani 1 d . . .
 H22 H 0.6256 0.2721 0.9054 0.074 Uiso 1 calc . . R
 C23 C 0.5014(4) 0.3223(4) 0.7902(2) 0.0552(8) Uani 1 d . . .
 H23 H 0.4036 0.3169 0.8200 0.066 Uiso 1 calc . . R
 C24 C 0.9264(5) 0.2735(6) 0.8543(3) 0.0821(13) Uani 1 d . . .
 H24A H 0.9209 0.3216 0.9113 0.123 Uiso 1 calc . . GR
 H24B H 1.0167 0.3013 0.8174 0.123 Uiso 1 calc . . GR
 H24C H 0.9337 0.1787 0.8699 0.123 Uiso 1 calc . . GR
 Cl1 Cl -0.2176(5) 0.1158(4) 0.10484(18) 0.2402(19) Uani 1 d . . .
 Cl2 Cl -0.1615(8) 0.3772(5) 0.1382(4) 0.324(3) Uani 1 d . . .
 C25 C -0.0884(10) 0.2118(14) 0.1339(5) 0.188(5) Uani 1 d . . .
 H25A H -0.0017 0.2093 0.0887 0.226 Uiso 1 calc . . R
 H25B H -0.0504 0.1820 0.1954 0.226 Uiso 1 calc . . R

loop_
  _atom_site_aniso_label
  _atom_site_aniso_U_11
  _atom_site_aniso_U_22
  _atom_site_aniso_U_33
  _atom_site_aniso_U_23
  _atom_site_aniso_U_13
  _atom_site_aniso_U_12
 S1 0.0407(4) 0.0376(4) 0.0502(4) -0.0080(3) -0.0010(3) -0.0045(3)
 O1 0.0469(12) 0.0406(11) 0.0682(14) -0.0174(10) -0.0111(10) 0.0050(9)
 O2 0.0564(13) 0.0348(11) 0.0666(14) -0.0050(9) -0.0108(11) -0.0029(9)
 O3 0.0433(12) 0.0687(15) 0.0631(14) -0.0144(11) 0.0072(10) -0.0087(10)
 N1 0.0429(13) 0.0374(13) 0.0525(14) -0.0087(11) -0.0043(11) -0.0040(10)
 C1 0.0421(17) 0.0509(18) 0.071(2) -0.0098(15) -0.0064(15) -0.0002(14)
 C2 0.0441(18) 0.057(2) 0.075(2) -0.0143(17) 0.0008(16) -0.0126(15)
 C3 0.0550(19) 0.0394(16) 0.064(2) -0.0104(14) 0.0026(15) -0.0132(14)
 C4 0.0477(17) 0.0350(15) 0.0577(18) -0.0078(13) 0.0052(13) -0.0033(12)
 C5 0.0412(15) 0.0346(14) 0.0446(15) -0.0044(11) 0.0000(12) -0.0050(11)
 C6 0.0465(16) 0.0367(15) 0.0511(17) -0.0060(12) -0.0042(13) -0.0018(12)
 C7 0.0547(19) 0.0386(17) 0.077(2) -0.0118(15) -0.0189(17) 0.0042(14)
 C8 0.0405(15) 0.0338(14) 0.0515(16) -0.0067(12) 0.0022(12) -0.0048(11)
 C9 0.0398(15) 0.0334(14) 0.0492(16) -0.0067(12) -0.0017(12) -0.0026(11)
 C10 0.0395(16) 0.0445(17) 0.068(2) -0.0129(14) -0.0046(14) 0.0028(13)
 C11 0.0420(16) 0.0420(16) 0.0632(19) -0.0114(14) 0.0070(14) -0.0095(12)
 C12 0.0544(19) 0.0494(18) 0.0607(19) -0.0059(15) 0.0120(15) -0.0104(14)
 C13 0.108(3) 0.058(2) 0.063(2) -0.0148(18) 0.010(2) -0.014(2)
 C14 0.149(5) 0.080(3) 0.065(3) -0.019(2) 0.011(3) -0.028(3)
 C15 0.146(5) 0.109(4) 0.058(3) -0.005(3) 0.005(3) -0.028(4)
 C16 0.177(6) 0.085(4) 0.073(3) 0.014(3) -0.008(4) -0.019(4)
 C17 0.123(4) 0.057(2) 0.071(3) -0.0024(19) 0.002(3) -0.007(2)
 C18 0.0437(16) 0.0349(14) 0.0483(16) -0.0050(12) -0.0029(12) -0.0067(11)
 C19 0.0505(17) 0.0400(15) 0.0449(16) -0.0018(12) 0.0018(13) -0.0019(13)
 C20 0.0475(17) 0.0435(17) 0.0579(19) -0.0024(14) -0.0001(14) -0.0010(13)
 C21 0.0560(19) 0.0484(18) 0.0565(19) -0.0005(14) -0.0105(15) -0.0013(14)
 C22 0.066(2) 0.070(2) 0.0469(18) 0.0076(16) -0.0034(16) -0.0041(18)
 C23 0.0526(19) 0.062(2) 0.0502(18) 0.0017(15) 0.0043(14) -0.0082(15)
 C24 0.066(3) 0.110(4) 0.069(3) 0.012(2) -0.015(2) 0.008(2)
 Cl1 0.354(5) 0.249(4) 0.1231(17) 0.0130(19) -0.075(2) -0.128(3)
 Cl2 0.431(8) 0.195(4) 0.348(6) -0.088(4) 0.079(5) 0.040(4)
 C25 0.127(6) 0.360(17) 0.075(4) 0.032(6) -0.018(4) -0.021(8)

_geom_special_details
;
 All esds (except the esd in the dihedral angle between two l.s. planes) 
 are estimated using the full covariance matrix.  The cell esds are taken 
 into account individually in the estimation of esds in distances, angles 
 and torsion angles; correlations between esds in cell parameters are only 
 used when they are defined by crystal symmetry.  An approximate (isotropic) 
 treatment of cell esds is used for estimating esds involving l.s. planes. 
;
loop_
  _geom_bond_atom_site_label_1
  _geom_bond_atom_site_label_2
  _geom_bond_distance
  _geom_bond_site_symmetry_2
  _geom_bond_publ_flag
 S1 O2 1.438(2) . ?
 S1 O3 1.435(2) . ?
 S1 N1 1.641(2) . ?
 S1 C18 1.764(3) . ?
 O1 C7 1.464(4) . ?
 O1 C8 1.332(4) . ?
 N1 C8 1.288(4) . ?
 C1 H1 0.9300 . ?
 C1 C2 1.382(5) . ?
 C1 C6 1.387(4) . ?
 C2 H2 0.9300 . ?
 C2 C3 1.372(5) . ?
 C3 H3 0.9300 . ?
 C3 C4 1.387(5) . ?
 C4 H4 0.9300 . ?
 C4 C5 1.387(4) . ?
 C5 C6 1.389(4) . ?
 C5 C9 1.489(4) . ?
 C6 C7 1.499(4) . ?
 C7 H7A 0.9700 . ?
 C7 H7B 0.9700 . ?
 C8 C9 1.484(4) . ?
 C9 C10 1.494(4) . ?
 C9 C11 1.567(4) . ?
 C10 H10A 0.9700 . ?
 C10 H10B 0.9700 . ?
 C10 C11 1.485(5) . ?
 C11 H11 0.9800 . ?
 C11 C12 1.485(5) . ?
 C12 C13 1.383(5) . ?
 C12 C17 1.385(6) . ?
 C13 H13 0.9300 . ?
 C13 C14 1.373(6) . ?
 C14 H14 0.9300 . ?
 C14 C15 1.354(8) . ?
 C15 H15 0.9300 . ?
 C15 C16 1.381(8) . ?
 C16 H16 0.9300 . ?
 C16 C17 1.370(7) . ?
 C17 H17 0.9300 . ?
 C18 C19 1.391(4) . ?
 C18 C23 1.372(5) . ?
 C19 H19 0.9300 . ?
 C19 C20 1.389(4) . ?
 C20 H20 0.9300 . ?
 C20 C21 1.386(5) . ?
 C21 C22 1.386(5) . ?
 C21 C24 1.514(5) . ?
 C22 H22 0.9300 . ?
 C22 C23 1.386(5) . ?
 C23 H23 0.9300 . ?
 C24 H24A 0.9600 . ?
 C24 H24B 0.9600 . ?
 C24 H24C 0.9600 . ?
 Cl1 C25 1.553(10) . ?
 Cl2 C25 1.757(13) . ?
 C25 H25A 0.9700 . ?
 C25 H25B 0.9700 . ?

loop_
  _geom_angle_atom_site_label_1
  _geom_angle_atom_site_label_2
  _geom_angle_atom_site_label_3
  _geom_angle
  _geom_angle_site_symmetry_1
  _geom_angle_site_symmetry_3
  _geom_angle_publ_flag
 O2 S1 N1 110.49(14) . . ?
 O2 S1 C18 108.13(13) . . ?
 O3 S1 O2 117.67(15) . . ?
 O3 S1 N1 110.80(13) . . ?
 O3 S1 C18 108.22(15) . . ?
 N1 S1 C18 99.98(13) . . ?
 C8 O1 C7 117.4(2) . . ?
 C8 N1 S1 119.6(2) . . ?
 C2 C1 H1 120.4 . . ?
 C2 C1 C6 119.3(3) . . ?
 C6 C1 H1 120.4 . . ?
 C1 C2 H2 119.9 . . ?
 C3 C2 C1 120.2(3) . . ?
 C3 C2 H2 119.9 . . ?
 C2 C3 H3 119.6 . . ?
 C2 C3 C4 120.8(3) . . ?
 C4 C3 H3 119.6 . . ?
 C3 C4 H4 120.2 . . ?
 C3 C4 C5 119.7(3) . . ?
 C5 C4 H4 120.2 . . ?
 C4 C5 C6 119.1(3) . . ?
 C4 C5 C9 124.8(3) . . ?
 C6 C5 C9 116.0(2) . . ?
 C1 C6 C5 120.9(3) . . ?
 C1 C6 C7 122.9(3) . . ?
 C5 C6 C7 116.1(3) . . ?
 O1 C7 C6 110.5(3) . . ?
 O1 C7 H7A 109.5 . . ?
 O1 C7 H7B 109.5 . . ?
 C6 C7 H7A 109.5 . . ?
 C6 C7 H7B 109.5 . . ?
 H7A C7 H7B 108.1 . . ?
 O1 C8 C9 117.9(3) . . ?
 N1 C8 O1 121.7(3) . . ?
 N1 C8 C9 120.4(3) . . ?
 C5 C9 C10 123.1(2) . . ?
 C5 C9 C11 121.5(2) . . ?
 C8 C9 C5 113.2(2) . . ?
 C8 C9 C10 117.3(3) . . ?
 C8 C9 C11 112.6(2) . . ?
 C10 C9 C11 58.0(2) . . ?
 C9 C10 H10A 117.4 . . ?
 C9 C10 H10B 117.4 . . ?
 H10A C10 H10B 114.5 . . ?
 C11 C10 C9 63.5(2) . . ?
 C11 C10 H10A 117.4 . . ?
 C11 C10 H10B 117.4 . . ?
 C9 C11 H11 113.8 . . ?
 C10 C11 C9 58.5(2) . . ?
 C10 C11 H11 113.8 . . ?
 C12 C11 C9 121.5(3) . . ?
 C12 C11 C10 124.5(3) . . ?
 C12 C11 H11 113.8 . . ?
 C13 C12 C11 124.0(3) . . ?
 C13 C12 C17 117.3(4) . . ?
 C17 C12 C11 118.7(3) . . ?
 C12 C13 H13 119.6 . . ?
 C14 C13 C12 120.8(4) . . ?
 C14 C13 H13 119.6 . . ?
 C13 C14 H14 119.2 . . ?
 C15 C14 C13 121.6(5) . . ?
 C15 C14 H14 119.2 . . ?
 C14 C15 H15 120.7 . . ?
 C14 C15 C16 118.6(5) . . ?
 C16 C15 H15 120.7 . . ?
 C15 C16 H16 119.9 . . ?
 C17 C16 C15 120.3(5) . . ?
 C17 C16 H16 119.9 . . ?
 C12 C17 H17 119.3 . . ?
 C16 C17 C12 121.5(4) . . ?
 C16 C17 H17 119.3 . . ?
 C19 C18 S1 119.5(2) . . ?
 C23 C18 S1 119.5(3) . . ?
 C23 C18 C19 120.9(3) . . ?
 C18 C19 H19 120.6 . . ?
 C20 C19 C18 118.8(3) . . ?
 C20 C19 H19 120.6 . . ?
 C19 C20 H20 119.4 . . ?
 C21 C20 C19 121.2(3) . . ?
 C21 C20 H20 119.4 . . ?
 C20 C21 C22 118.5(3) . . ?
 C20 C21 C24 120.7(3) . . ?
 C22 C21 C24 120.8(3) . . ?
 C21 C22 H22 119.4 . . ?
 C23 C22 C21 121.2(3) . . ?
 C23 C22 H22 119.4 . . ?
 C18 C23 C22 119.4(3) . . ?
 C18 C23 H23 120.3 . . ?
 C22 C23 H23 120.3 . . ?
 C21 C24 H24A 109.5 . . ?
 C21 C24 H24B 109.5 . . ?
 C21 C24 H24C 109.5 . . ?
 H24A C24 H24B 109.5 . . ?
 H24A C24 H24C 109.5 . . ?
 H24B C24 H24C 109.5 . . ?
 Cl1 C25 Cl2 110.5(6) . . ?
 Cl1 C25 H25A 109.6 . . ?
 Cl1 C25 H25B 109.6 . . ?
 Cl2 C25 H25A 109.6 . . ?
 Cl2 C25 H25B 109.6 . . ?
 H25A C25 H25B 108.1 . . ?

loop_
  _geom_torsion_atom_site_label_1
  _geom_torsion_atom_site_label_2
  _geom_torsion_atom_site_label_3
  _geom_torsion_atom_site_label_4
  _geom_torsion
  _geom_torsion_site_symmetry_1
  _geom_torsion_site_symmetry_2
  _geom_torsion_site_symmetry_3
  _geom_torsion_site_symmetry_4
  _geom_torsion_publ_flag
 S1 N1 C8 O1 -2.3(4) . . . . ?
 S1 N1 C8 C9 177.7(2) . . . . ?
 S1 C18 C19 C20 177.3(2) . . . . ?
 S1 C18 C23 C22 -177.3(3) . . . . ?
 O1 C8 C9 C5 -36.0(4) . . . . ?
 O1 C8 C9 C10 171.1(3) . . . . ?
 O1 C8 C9 C11 106.6(3) . . . . ?
 O2 S1 N1 C8 -68.1(3) . . . . ?
 O2 S1 C18 C19 -53.1(3) . . . . ?
 O2 S1 C18 C23 123.2(3) . . . . ?
 O3 S1 N1 C8 64.2(3) . . . . ?
 O3 S1 C18 C19 178.4(2) . . . . ?
 O3 S1 C18 C23 -5.3(3) . . . . ?
 N1 S1 C18 C19 62.5(3) . . . . ?
 N1 S1 C18 C23 -121.3(3) . . . . ?
 N1 C8 C9 C5 144.0(3) . . . . ?
 N1 C8 C9 C10 -8.9(4) . . . . ?
 N1 C8 C9 C11 -73.4(4) . . . . ?
 C1 C2 C3 C4 0.5(6) . . . . ?
 C1 C6 C7 O1 134.9(3) . . . . ?
 C2 C1 C6 C5 -2.3(5) . . . . ?
 C2 C1 C6 C7 177.5(3) . . . . ?
 C2 C3 C4 C5 -2.2(5) . . . . ?
 C3 C4 C5 C6 1.6(5) . . . . ?
 C3 C4 C5 C9 177.8(3) . . . . ?
 C4 C5 C6 C1 0.7(5) . . . . ?
 C4 C5 C6 C7 -179.2(3) . . . . ?
 C4 C5 C9 C8 -140.1(3) . . . . ?
 C4 C5 C9 C10 11.0(5) . . . . ?
 C4 C5 C9 C11 80.9(4) . . . . ?
 C5 C6 C7 O1 -45.3(4) . . . . ?
 C5 C9 C10 C11 109.2(3) . . . . ?
 C5 C9 C11 C10 -111.8(3) . . . . ?
 C5 C9 C11 C12 2.0(4) . . . . ?
 C6 C1 C2 C3 1.7(6) . . . . ?
 C6 C5 C9 C8 36.2(4) . . . . ?
 C6 C5 C9 C10 -172.7(3) . . . . ?
 C6 C5 C9 C11 -102.8(3) . . . . ?
 C7 O1 C8 N1 173.7(3) . . . . ?
 C7 O1 C8 C9 -6.3(4) . . . . ?
 C8 O1 C7 C6 46.8(4) . . . . ?
 C8 C9 C10 C11 -100.8(3) . . . . ?
 C8 C9 C11 C10 109.0(3) . . . . ?
 C8 C9 C11 C12 -137.1(3) . . . . ?
 C9 C5 C6 C1 -175.9(3) . . . . ?
 C9 C5 C6 C7 4.3(4) . . . . ?
 C9 C10 C11 C12 -108.8(3) . . . . ?
 C9 C11 C12 C13 -72.6(5) . . . . ?
 C9 C11 C12 C17 109.9(4) . . . . ?
 C10 C9 C11 C12 113.8(3) . . . . ?
 C10 C11 C12 C13 -1.4(5) . . . . ?
 C10 C11 C12 C17 -178.9(4) . . . . ?
 C11 C12 C13 C14 -177.9(4) . . . . ?
 C11 C12 C17 C16 176.7(5) . . . . ?
 C12 C13 C14 C15 1.0(9) . . . . ?
 C13 C12 C17 C16 -1.0(8) . . . . ?
 C13 C14 C15 C16 -0.4(10) . . . . ?
 C14 C15 C16 C17 -0.9(10) . . . . ?
 C15 C16 C17 C12 1.6(10) . . . . ?
 C17 C12 C13 C14 -0.3(7) . . . . ?
 C18 S1 N1 C8 178.2(2) . . . . ?
 C18 C19 C20 C21 -0.3(5) . . . . ?
 C19 C18 C23 C22 -1.1(5) . . . . ?
 C19 C20 C21 C22 -0.5(5) . . . . ?
 C19 C20 C21 C24 179.7(4) . . . . ?
 C20 C21 C22 C23 0.6(5) . . . . ?
 C21 C22 C23 C18 0.2(6) . . . . ?
 C23 C18 C19 C20 1.1(5) . . . . ?
 C24 C21 C22 C23 -179.6(4) . . . . ?

data_170628_ran3_186_1_compound_3k
_audit_creation_date              2017-06-29
_audit_creation_method
;
Olex2 1.2
(compiled 2017.03.28 svn.r3405 for OlexSys, GUI svn.r5337)
;
_shelx_SHELXL_version_number      '2016/6'
_publ_contact_author_address      ?
_publ_contact_author_email        ?
_publ_contact_author_id_orcid     ?
_publ_contact_author_name         ''
_publ_contact_author_phone        ?
_publ_section_references
;
Dolomanov, O.V., Bourhis, L.J., Gildea, R.J, Howard, J.A.K. & Puschmann, H.
 (2009), J. Appl. Cryst. 42, 339-341.

Sheldrick, G.M. (2015). Acta Cryst. C71, 3-8.
;
_chemical_name_common             ?
_chemical_name_systematic         ?
_chemical_formula_moiety          'C25 H21 N O3 S'
_chemical_formula_sum             'C25 H21 N O3 S'
_chemical_formula_weight          415.49
_chemical_melting_point           ?
_chemical_oxdiff_formula          'c h n o S'
loop_
  _atom_type_symbol
  _atom_type_description
  _atom_type_scat_dispersion_real
  _atom_type_scat_dispersion_imag
  _atom_type_scat_source
 'C' 'C' 0.0033 0.0016 'International Tables Vol C Tables 4.2.6.8 and 6.1.1.4'
 'H' 'H' 0.0000 0.0000 'International Tables Vol C Tables 4.2.6.8 and 6.1.1.4'
 'N' 'N' 0.0061 0.0033 'International Tables Vol C Tables 4.2.6.8 and 6.1.1.4'
 'O' 'O' 0.0106 0.0060 'International Tables Vol C Tables 4.2.6.8 and 6.1.1.4'
 'S' 'S' 0.1246 0.1234 'International Tables Vol C Tables 4.2.6.8 and 6.1.1.4'

_shelx_space_group_comment
;
The symmetry employed for this shelxl refinement is uniquely defined
by the following loop, which should always be used as a source of
symmetry information in preference to the above space-group names.
They are only intended as comments.
;
_space_group_crystal_system       'triclinic'
_space_group_IT_number            2
_space_group_name_H-M_alt         'P -1'
_space_group_name_Hall            '-P 1'
loop_
  _space_group_symop_operation_xyz
 'x, y, z'
 '-x, -y, -z'

_cell_length_a                    8.3061(5)
_cell_length_b                    15.8000(10)
_cell_length_c                    16.4284(11)
_cell_angle_alpha                 96.424(6)
_cell_angle_beta                  101.261(6)
_cell_angle_gamma                 103.543(6)
_cell_volume                      2027.4(2)
_cell_formula_units_Z             4
_cell_measurement_reflns_used     3400
_cell_measurement_temperature     170.0
_cell_measurement_theta_max       29.3875
_cell_measurement_theta_min       3.1584
_shelx_estimated_absorpt_T_max    0.967
_shelx_estimated_absorpt_T_min    0.915
_exptl_absorpt_coefficient_mu     0.187
_exptl_absorpt_correction_T_max   1.00000
_exptl_absorpt_correction_T_min   0.54540
_exptl_absorpt_correction_type    multi-scan
_exptl_absorpt_process_details
;
CrysAlisPro, Agilent Technologies,
Version 1.171.35.11 (release 16-05-2011 CrysAlis171 .NET)
(compiled May 16 2011,17:55:39)
Empirical absorption correction using spherical harmonics,
 implemented in SCALE3 ABSPACK scaling algorithm.
;
_exptl_absorpt_special_details    ?
_exptl_crystal_colour             colourless
_exptl_crystal_colour_primary     colourless
_exptl_crystal_density_diffrn     1.361
_exptl_crystal_density_meas       ?
_exptl_crystal_density_method     ?
_exptl_crystal_description        plate
_exptl_crystal_F_000              872
_exptl_crystal_size_max           0.48
_exptl_crystal_size_mid           0.32
_exptl_crystal_size_min           0.18
_exptl_transmission_factor_max    ?
_exptl_transmission_factor_min    ?
_diffrn_reflns_av_R_equivalents   0.0552
_diffrn_reflns_av_unetI/netI      0.0756
_diffrn_reflns_Laue_measured_fraction_full 0.995
_diffrn_reflns_Laue_measured_fraction_max 0.995
_diffrn_reflns_limit_h_max        8
_diffrn_reflns_limit_h_min        -10
_diffrn_reflns_limit_k_max        19
_diffrn_reflns_limit_k_min        -17
_diffrn_reflns_limit_l_max        19
_diffrn_reflns_limit_l_min        -19
_diffrn_reflns_number             13510
_diffrn_reflns_point_group_measured_fraction_full 0.995
_diffrn_reflns_point_group_measured_fraction_max 0.995
_diffrn_reflns_theta_full         25.242
_diffrn_reflns_theta_max          25.348
_diffrn_reflns_theta_min          3.165
_diffrn_ambient_temperature       170.0
_diffrn_detector_area_resol_mean  10.3592
_diffrn_measured_fraction_theta_full 0.995
_diffrn_measured_fraction_theta_max 0.995
_diffrn_measurement_details
;
#__ type_ start__ end____ width___ exp.time_
  1 omega  -32.00   55.00   1.0000   13.0000
omega____ theta____ kappa____ phi______ frames
    -      -11.4683   38.0000  150.0000 87

#__ type_ start__ end____ width___ exp.time_
  2 omega  -88.00   19.00   1.0000   13.0000
omega____ theta____ kappa____ phi______ frames
    -      -11.4683  -77.0000    0.0000 107

#__ type_ start__ end____ width___ exp.time_
  3 omega  -17.00   85.00   1.0000   13.0000
omega____ theta____ kappa____ phi______ frames
    -       11.7808   77.0000 -120.0000 102
;
_diffrn_measurement_device_type   'Xcalibur, Atlas, Gemini ultra'
_diffrn_measurement_method        '\w scans'
_diffrn_orient_matrix_UB_11       0.0125026000
_diffrn_orient_matrix_UB_12       0.0166292000
_diffrn_orient_matrix_UB_13       -0.0372856000
_diffrn_orient_matrix_UB_21       0.0172826000
_diffrn_orient_matrix_UB_22       0.0437360000
_diffrn_orient_matrix_UB_23       0.0216341000
_diffrn_orient_matrix_UB_31       0.0876836000
_diffrn_orient_matrix_UB_32       0.0016664000
_diffrn_orient_matrix_UB_33       0.0115839000
_diffrn_radiation_monochromator   graphite
_diffrn_radiation_type            MoK\a
_diffrn_radiation_wavelength      0.71073
_diffrn_source                    'Enhance (Mo) X-ray Source'
_reflns_Friedel_coverage          0.000
_reflns_Friedel_fraction_full     .
_reflns_Friedel_fraction_max      .
_reflns_number_gt                 5282
_reflns_number_total              7374
_reflns_odcompleteness_completeness 99.63
_reflns_odcompleteness_iscentric  1
_reflns_odcompleteness_theta      26.32
_reflns_special_details
;
 Reflections were merged by SHELXL according to the crystal
 class for the calculation of statistics and refinement.
 
 _reflns_Friedel_fraction is defined as the number of unique
 Friedel pairs measured divided by the number that would be
 possible theoretically, ignoring centric projections and
 systematic absences.
;
_reflns_threshold_expression      'I > 2\s(I)'
_computing_cell_refinement
;
CrysAlisPro, Agilent Technologies,
Version 1.171.35.11 (release 16-05-2011 CrysAlis171 .NET)
(compiled May 16 2011,17:55:39)
;
_computing_data_collection
;
CrysAlisPro, Agilent Technologies,
Version 1.171.35.11 (release 16-05-2011 CrysAlis171 .NET)
(compiled May 16 2011,17:55:39)
;
_computing_data_reduction
;
CrysAlisPro, Agilent Technologies,
Version 1.171.35.11 (release 16-05-2011 CrysAlis171 .NET)
(compiled May 16 2011,17:55:39)
;
_computing_molecular_graphics     'Olex2 (Dolomanov et al., 2009)'
_computing_publication_material   'Olex2 (Dolomanov et al., 2009)'
_computing_structure_refinement   'ShelXL (Sheldrick, 2015)'
_computing_structure_solution     'ShelXS (Sheldrick, 2008)'
_refine_diff_density_max          1.097
_refine_diff_density_min          -0.651
_refine_diff_density_rms          0.097
_refine_ls_extinction_coef        .
_refine_ls_extinction_method      none
_refine_ls_goodness_of_fit_ref    1.057
_refine_ls_hydrogen_treatment     constr
_refine_ls_matrix_type            full
_refine_ls_number_parameters      543
_refine_ls_number_reflns          7374
_refine_ls_number_restraints      0
_refine_ls_R_factor_all           0.1123
_refine_ls_R_factor_gt            0.0855
_refine_ls_restrained_S_all       1.057
_refine_ls_shift/su_max           0.000
_refine_ls_shift/su_mean          0.000
_refine_ls_structure_factor_coef  Fsqd
_refine_ls_weighting_details
'w=1/[\s^2^(Fo^2^)+(0.1307P)^2^+1.9343P] where P=(Fo^2^+2Fc^2^)/3'
_refine_ls_weighting_scheme       calc
_refine_ls_wR_factor_gt           0.2199
_refine_ls_wR_factor_ref          0.2492
_refine_special_details           ?
_olex2_refinement_description
;
1. Fixed Uiso
 At 1.2 times of:
  All C(H) groups, All C(H,H) groups
 At 1.5 times of:
  All C(H,H,H) groups
2.a Ternary CH refined with riding coordinates:
 C7(H7), C8(H8), C32(H32), C33(H33)
2.b Secondary CH2 refined with riding coordinates:
 C9(H9A,H9B), C12(H12A,H12B), C34(H34A,H34B), C37(H37A,H37B)
2.c Aromatic/amide H refined with riding coordinates:
 C1(H1), C2(H2), C3(H3), C4(H4), C15(H15), C16(H16), C17(H17), C18(H18),
 C20(H20), C21(H21), C23(H23), C24(H24), C26(H26), C27(H27), C28(H28), C29(H29),
  C40(H40), C41(H41), C42(H42), C43(H43), C45(H45), C46(H46), C48(H48), C49(H49)
2.d Idealised Me refined as rotating group:
 C25(H25A,H25B,H25C), C50(H50A,H50B,H50C)
;
_atom_sites_solution_hydrogens    geom
_atom_sites_solution_primary      ?
_atom_sites_solution_secondary    ?
loop_
  _atom_site_label
  _atom_site_type_symbol
  _atom_site_fract_x
  _atom_site_fract_y
  _atom_site_fract_z
  _atom_site_U_iso_or_equiv
  _atom_site_adp_type
  _atom_site_occupancy
  _atom_site_site_symmetry_order
  _atom_site_calc_flag
  _atom_site_refinement_flags_posn
  _atom_site_refinement_flags_adp
  _atom_site_refinement_flags_occupancy
  _atom_site_disorder_assembly
  _atom_site_disorder_group
 S1 S 0.68896(12) 0.60589(6) 0.23504(6) 0.0308(3) Uani 1 1 d . . . . .
 O1 O 0.8037(4) 0.67852(18) 0.21334(18) 0.0371(7) Uani 1 1 d . . . . .
 O2 O 0.5162(3) 0.60998(19) 0.22862(18) 0.0388(7) Uani 1 1 d . . . . .
 O3 O 0.9594(3) 0.52949(17) 0.20853(17) 0.0324(6) Uani 1 1 d . . . . .
 N1 N 0.6734(4) 0.5131(2) 0.1748(2) 0.0316(7) Uani 1 1 d . . . . .
 C1 C 0.4711(5) 0.2464(3) -0.0614(3) 0.0437(10) Uani 1 1 d . . . . .
 H1 H 0.413726 0.287903 -0.081755 0.052 Uiso 1 1 calc R . . . .
 C2 C 0.4626(6) 0.1687(4) -0.1132(3) 0.0569(13) Uani 1 1 d . . . . .
 H2 H 0.401387 0.157671 -0.170236 0.068 Uiso 1 1 calc R . . . .
 C3 C 0.5413(7) 0.1081(4) -0.0829(4) 0.0623(14) Uani 1 1 d . . . . .
 H3 H 0.532353 0.055109 -0.119072 0.075 Uiso 1 1 calc R . . . .
 C4 C 0.6341(7) 0.1226(3) -0.0004(4) 0.0561(13) Uani 1 1 d . . . . .
 H4 H 0.688189 0.079918 0.020073 0.067 Uiso 1 1 calc R . . . .
 C5 C 0.6466(5) 0.2007(3) 0.0521(3) 0.0407(10) Uani 1 1 d . . . . .
 C6 C 0.5662(5) 0.2616(3) 0.0212(3) 0.0367(9) Uani 1 1 d . . . . .
 C7 C 0.5997(5) 0.3412(3) 0.0866(3) 0.0331(9) Uani 1 1 d . . . . .
 H7 H 0.504313 0.367954 0.093364 0.040 Uiso 1 1 calc R . . . .
 C8 C 0.7095(5) 0.3228(3) 0.1628(3) 0.0355(9) Uani 1 1 d . . . . .
 H8 H 0.686808 0.339635 0.219162 0.043 Uiso 1 1 calc R . . . .
 C9 C 0.7412(6) 0.2328(3) 0.1422(3) 0.0446(11) Uani 1 1 d . . . . .
 H9A H 0.864224 0.237883 0.148501 0.054 Uiso 1 1 calc R . . . .
 H9B H 0.696588 0.192389 0.179211 0.054 Uiso 1 1 calc R . . . .
 C10 C 0.7809(5) 0.3977(2) 0.1151(2) 0.0280(8) Uani 1 1 d . . . . .
 C11 C 0.8026(5) 0.4841(3) 0.1673(2) 0.0293(8) Uani 1 1 d . . . . .
 C12 C 1.0952(5) 0.4853(3) 0.2048(3) 0.0356(9) Uani 1 1 d . . . . .
 H12A H 1.086513 0.439146 0.241069 0.043 Uiso 1 1 calc R . . . .
 H12B H 1.207094 0.528741 0.226692 0.043 Uiso 1 1 calc R . . . .
 C13 C 1.0840(5) 0.4443(2) 0.1174(2) 0.0287(8) Uani 1 1 d . . . . .
 C14 C 0.9223(4) 0.3967(2) 0.0710(2) 0.0252(8) Uani 1 1 d . . . . .
 C15 C 0.9061(5) 0.3594(3) -0.0121(2) 0.0322(9) Uani 1 1 d . . . . .
 H15 H 0.796893 0.329208 -0.046147 0.039 Uiso 1 1 calc R . . . .
 C16 C 1.0485(5) 0.3660(3) -0.0453(3) 0.0348(9) Uani 1 1 d . . . . .
 H16 H 1.036420 0.338167 -0.101326 0.042 Uiso 1 1 calc R . . . .
 C17 C 1.2081(5) 0.4125(3) 0.0017(3) 0.0352(9) Uani 1 1 d . . . . .
 H17 H 1.304728 0.416794 -0.021953 0.042 Uiso 1 1 calc R . . . .
 C18 C 1.2261(5) 0.4527(3) 0.0829(3) 0.0333(9) Uani 1 1 d . . . . .
 H18 H 1.334955 0.485856 0.115236 0.040 Uiso 1 1 calc R . . . .
 C19 C 0.7689(5) 0.5933(2) 0.3385(2) 0.0299(8) Uani 1 1 d . . . . .
 C20 C 0.6706(5) 0.5327(3) 0.3763(3) 0.0373(9) Uani 1 1 d . . . . .
 H20 H 0.564633 0.495230 0.344827 0.045 Uiso 1 1 calc R . . . .
 C21 C 0.7275(6) 0.5271(3) 0.4596(3) 0.0460(11) Uani 1 1 d . . . . .
 H21 H 0.659643 0.485734 0.485150 0.055 Uiso 1 1 calc R . . . .
 C22 C 0.8827(6) 0.5811(3) 0.5072(3) 0.0403(10) Uani 1 1 d . . . . .
 C23 C 0.9813(6) 0.6400(3) 0.4678(3) 0.0407(10) Uani 1 1 d . . . . .
 H23 H 1.088757 0.676280 0.498799 0.049 Uiso 1 1 calc R . . . .
 C24 C 0.9258(5) 0.6464(3) 0.3845(3) 0.0361(9) Uani 1 1 d . . . . .
 H24 H 0.994482 0.687012 0.358658 0.043 Uiso 1 1 calc R . . . .
 C25 C 0.9391(7) 0.5775(4) 0.5985(3) 0.0526(12) Uani 1 1 d . . . . .
 H25A H 1.060719 0.606984 0.618028 0.079 Uiso 1 1 calc GR . . . .
 H25B H 0.918920 0.515708 0.606786 0.079 Uiso 1 1 calc GR . . . .
 H25C H 0.874611 0.607273 0.630661 0.079 Uiso 1 1 calc GR . . . .
 S2 S 0.46604(13) 0.26758(7) 0.35193(7) 0.0358(3) Uani 1 1 d . . . . .
 O4 O 0.6428(4) 0.2843(2) 0.3520(2) 0.0484(8) Uani 1 1 d . . . . .
 O5 O 0.4031(4) 0.3414(2) 0.3754(2) 0.0495(8) Uani 1 1 d . . . . .
 O6 O 0.5742(4) 0.28268(19) 0.52520(18) 0.0424(7) Uani 1 1 d . . . . .
 N2 N 0.4126(4) 0.1883(2) 0.4063(2) 0.0377(8) Uani 1 1 d . . . . .
 C26 C 0.1932(7) -0.0793(4) 0.5487(4) 0.0684(16) Uani 1 1 d . . . . .
 H26 H 0.217849 -0.105001 0.499047 0.082 Uiso 1 1 calc R . . . .
 C27 C 0.1486(7) -0.1298(4) 0.6121(5) 0.0755(18) Uani 1 1 d . . . . .
 H27 H 0.139066 -0.191417 0.604303 0.091 Uiso 1 1 calc R . . . .
 C28 C 0.1197(8) -0.0890(4) 0.6836(5) 0.078(2) Uani 1 1 d . . . . .
 H28 H 0.096716 -0.123726 0.725714 0.093 Uiso 1 1 calc R . . . .
 C29 C 0.1216(7) -0.0016(4) 0.6990(4) 0.0722(17) Uani 1 1 d . . . . .
 H29 H 0.095480 0.024244 0.748202 0.087 Uiso 1 1 calc R . . . .
 C30 C 0.1679(6) 0.0495(3) 0.6323(3) 0.0501(12) Uani 1 1 d . . . . .
 C31 C 0.1980(6) 0.0063(3) 0.5640(4) 0.0556(13) Uani 1 1 d . . . . .
 C32 C 0.2440(6) 0.0752(3) 0.5086(3) 0.0567(14) Uani 1 1 d . . . . .
 H32 H 0.199880 0.059329 0.446184 0.068 Uiso 1 1 calc R . . . .
 C33 C 0.2278(6) 0.1586(4) 0.5530(3) 0.0522(12) Uani 1 1 d . . . . .
 H33 H 0.177960 0.199117 0.519344 0.063 Uiso 1 1 calc R . . . .
 C34 C 0.1775(7) 0.1435(3) 0.6352(4) 0.0577(13) Uani 1 1 d . . . . .
 H34A H 0.264813 0.180043 0.684283 0.069 Uiso 1 1 calc R . . . .
 H34B H 0.066313 0.155682 0.636560 0.069 Uiso 1 1 calc R . . . .
 C35 C 0.4057(5) 0.1446(3) 0.5434(3) 0.0451(11) Uani 1 1 d . . . . .
 C36 C 0.4654(5) 0.2058(3) 0.4869(3) 0.0357(9) Uani 1 1 d . . . . .
 C37 C 0.5974(7) 0.3043(3) 0.6163(3) 0.0522(12) Uani 1 1 d . . . . .
 H37A H 0.491855 0.315023 0.629630 0.063 Uiso 1 1 calc R . . . .
 H37B H 0.690660 0.358707 0.638558 0.063 Uiso 1 1 calc R . . . .
 C38 C 0.6391(5) 0.2295(3) 0.6567(3) 0.0389(10) Uani 1 1 d . . . . .
 C39 C 0.5438(5) 0.1464(3) 0.6176(3) 0.0415(10) Uani 1 1 d . . . . .
 C40 C 0.5860(6) 0.0742(3) 0.6463(3) 0.0530(13) Uani 1 1 d . . . . .
 H40 H 0.523588 0.016355 0.618750 0.064 Uiso 1 1 calc R . . . .
 C41 C 0.7195(6) 0.0858(4) 0.7155(3) 0.0606(14) Uani 1 1 d . . . . .
 H41 H 0.747614 0.035589 0.735160 0.073 Uiso 1 1 calc R . . . .
 C42 C 0.8115(6) 0.1686(4) 0.7558(3) 0.0553(13) Uani 1 1 d . . . . .
 H42 H 0.902114 0.175701 0.803506 0.066 Uiso 1 1 calc R . . . .
 C43 C 0.7721(6) 0.2416(3) 0.7269(3) 0.0499(12) Uani 1 1 d . . . . .
 H43 H 0.834815 0.299366 0.754528 0.060 Uiso 1 1 calc R . . . .
 C44 C 0.3496(5) 0.2165(3) 0.2496(3) 0.0339(9) Uani 1 1 d . . . . .
 C45 C 0.3634(6) 0.1361(3) 0.2143(3) 0.0444(11) Uani 1 1 d . . . . .
 H45 H 0.427723 0.103917 0.246589 0.053 Uiso 1 1 calc R . . . .
 C46 C 0.2824(6) 0.1026(3) 0.1312(3) 0.0495(12) Uani 1 1 d . . . . .
 H46 H 0.290609 0.046675 0.107176 0.059 Uiso 1 1 calc R . . . .
 C47 C 0.1899(5) 0.1482(3) 0.0820(3) 0.0403(10) Uani 1 1 d . . . . .
 C48 C 0.1790(6) 0.2290(3) 0.1193(3) 0.0463(11) Uani 1 1 d . . . . .
 H48 H 0.116234 0.261813 0.087021 0.056 Uiso 1 1 calc R . . . .
 C49 C 0.2570(6) 0.2625(3) 0.2017(3) 0.0451(11) Uani 1 1 d . . . . .
 H49 H 0.247078 0.317916 0.226125 0.054 Uiso 1 1 calc R . . . .
 C50 C 0.1076(6) 0.1141(4) -0.0091(3) 0.0552(13) Uani 1 1 d . . . . .
 H50A H -0.016044 0.094388 -0.016204 0.083 Uiso 1 1 calc GR . . . .
 H50B H 0.149905 0.064354 -0.028610 0.083 Uiso 1 1 calc GR . . . .
 H50C H 0.135039 0.161214 -0.042177 0.083 Uiso 1 1 calc GR . . . .

loop_
  _atom_site_aniso_label
  _atom_site_aniso_U_11
  _atom_site_aniso_U_22
  _atom_site_aniso_U_33
  _atom_site_aniso_U_23
  _atom_site_aniso_U_13
  _atom_site_aniso_U_12
 S1 0.0269(5) 0.0356(6) 0.0301(5) 0.0015(4) 0.0069(4) 0.0101(4)
 O1 0.0376(16) 0.0359(15) 0.0380(16) 0.0065(12) 0.0110(13) 0.0082(13)
 O2 0.0300(15) 0.0481(17) 0.0405(17) 0.0005(13) 0.0088(12) 0.0174(13)
 O3 0.0212(13) 0.0377(15) 0.0349(15) -0.0031(12) 0.0049(11) 0.0065(12)
 N1 0.0235(16) 0.0387(19) 0.0328(18) 0.0002(14) 0.0081(13) 0.0098(14)
 C1 0.029(2) 0.044(3) 0.050(3) 0.000(2) 0.0019(19) 0.0027(19)
 C2 0.046(3) 0.062(3) 0.050(3) -0.010(3) 0.004(2) 0.004(3)
 C3 0.061(3) 0.047(3) 0.071(4) -0.011(3) 0.014(3) 0.009(3)
 C4 0.054(3) 0.035(3) 0.082(4) 0.006(3) 0.024(3) 0.013(2)
 C5 0.032(2) 0.034(2) 0.058(3) 0.010(2) 0.015(2) 0.0054(18)
 C6 0.0231(19) 0.036(2) 0.047(3) 0.0043(19) 0.0106(18) -0.0003(17)
 C7 0.0210(18) 0.038(2) 0.041(2) 0.0029(18) 0.0101(16) 0.0071(17)
 C8 0.030(2) 0.042(2) 0.037(2) 0.0118(18) 0.0125(17) 0.0064(18)
 C9 0.036(2) 0.048(3) 0.054(3) 0.023(2) 0.015(2) 0.010(2)
 C10 0.0270(19) 0.030(2) 0.027(2) 0.0032(16) 0.0055(15) 0.0095(16)
 C11 0.0225(19) 0.038(2) 0.028(2) 0.0066(16) 0.0086(15) 0.0061(16)
 C12 0.025(2) 0.045(2) 0.037(2) 0.0023(19) 0.0044(17) 0.0144(18)
 C13 0.0257(19) 0.028(2) 0.034(2) 0.0054(16) 0.0068(16) 0.0092(16)
 C14 0.0244(18) 0.0232(18) 0.032(2) 0.0091(15) 0.0076(15) 0.0105(15)
 C15 0.029(2) 0.034(2) 0.032(2) 0.0052(17) 0.0018(16) 0.0091(17)
 C16 0.037(2) 0.041(2) 0.030(2) 0.0065(18) 0.0115(17) 0.0148(19)
 C17 0.031(2) 0.041(2) 0.041(2) 0.0101(19) 0.0142(18) 0.0160(19)
 C18 0.0217(19) 0.036(2) 0.043(2) 0.0081(18) 0.0055(16) 0.0107(17)
 C19 0.0280(19) 0.028(2) 0.033(2) 0.0012(16) 0.0071(16) 0.0088(16)
 C20 0.034(2) 0.037(2) 0.040(2) 0.0057(18) 0.0096(18) 0.0051(18)
 C21 0.048(3) 0.050(3) 0.047(3) 0.016(2) 0.020(2) 0.014(2)
 C22 0.039(2) 0.046(3) 0.040(2) 0.006(2) 0.0099(19) 0.020(2)
 C23 0.037(2) 0.046(3) 0.034(2) 0.0003(19) 0.0042(18) 0.009(2)
 C24 0.027(2) 0.038(2) 0.041(2) 0.0041(18) 0.0083(17) 0.0060(18)
 C25 0.063(3) 0.067(3) 0.037(3) 0.014(2) 0.013(2) 0.031(3)
 S2 0.0317(6) 0.0368(6) 0.0384(6) 0.0083(4) 0.0091(4) 0.0059(4)
 O4 0.0306(16) 0.063(2) 0.0460(19) 0.0118(16) 0.0087(13) 0.0014(14)
 O5 0.059(2) 0.0378(17) 0.051(2) 0.0059(14) 0.0092(16) 0.0146(15)
 O6 0.0521(18) 0.0329(16) 0.0366(17) 0.0003(13) 0.0065(13) 0.0062(14)
 N2 0.0311(18) 0.040(2) 0.040(2) 0.0092(16) 0.0081(15) 0.0041(16)
 C26 0.052(3) 0.049(3) 0.092(5) 0.004(3) -0.010(3) 0.015(3)
 C27 0.055(3) 0.056(4) 0.108(6) 0.029(4) 0.002(3) 0.007(3)
 C28 0.069(4) 0.054(4) 0.095(5) 0.037(3) -0.018(3) 0.007(3)
 C29 0.044(3) 0.075(4) 0.085(4) 0.039(3) -0.005(3) -0.006(3)
 C30 0.032(2) 0.036(2) 0.071(3) 0.006(2) -0.006(2) 0.004(2)
 C31 0.028(2) 0.058(3) 0.068(4) -0.007(3) 0.002(2) 0.001(2)
 C32 0.033(2) 0.055(3) 0.065(3) 0.032(3) -0.011(2) -0.013(2)
 C33 0.037(3) 0.063(3) 0.056(3) 0.014(3) 0.012(2) 0.009(2)
 C34 0.050(3) 0.053(3) 0.067(4) 0.007(3) 0.014(3) 0.010(2)
 C35 0.031(2) 0.053(3) 0.043(3) 0.014(2) 0.0035(19) -0.001(2)
 C36 0.026(2) 0.045(2) 0.037(2) 0.0098(19) 0.0110(17) 0.0066(18)
 C37 0.064(3) 0.048(3) 0.041(3) -0.001(2) 0.006(2) 0.017(2)
 C38 0.037(2) 0.048(3) 0.032(2) 0.0049(19) 0.0120(18) 0.008(2)
 C39 0.024(2) 0.053(3) 0.044(3) 0.014(2) 0.0074(18) -0.0005(19)
 C40 0.042(3) 0.048(3) 0.057(3) 0.018(2) -0.003(2) -0.006(2)
 C41 0.046(3) 0.058(3) 0.067(4) 0.030(3) -0.007(2) -0.001(2)
 C42 0.033(2) 0.067(3) 0.057(3) 0.024(3) -0.004(2) -0.001(2)
 C43 0.042(3) 0.059(3) 0.037(3) 0.004(2) 0.004(2) -0.002(2)
 C44 0.0252(19) 0.038(2) 0.042(2) 0.0158(18) 0.0113(17) 0.0079(17)
 C45 0.038(2) 0.035(2) 0.059(3) 0.013(2) 0.000(2) 0.015(2)
 C46 0.048(3) 0.037(2) 0.058(3) 0.002(2) 0.001(2) 0.012(2)
 C47 0.032(2) 0.042(2) 0.043(3) 0.011(2) 0.0084(19) 0.0009(19)
 C48 0.046(3) 0.050(3) 0.048(3) 0.018(2) 0.007(2) 0.021(2)
 C49 0.049(3) 0.044(3) 0.050(3) 0.010(2) 0.013(2) 0.024(2)
 C50 0.047(3) 0.059(3) 0.048(3) 0.007(2) 0.001(2) -0.001(2)

_geom_special_details
;
 All esds (except the esd in the dihedral angle between two l.s. planes)
 are estimated using the full covariance matrix.  The cell esds are taken
 into account individually in the estimation of esds in distances, angles
 and torsion angles; correlations between esds in cell parameters are only
 used when they are defined by crystal symmetry.  An approximate (isotropic)
 treatment of cell esds is used for estimating esds involving l.s. planes.
;
loop_
  _geom_bond_atom_site_label_1
  _geom_bond_atom_site_label_2
  _geom_bond_distance
  _geom_bond_site_symmetry_2
  _geom_bond_publ_flag
 S1 O1 1.437(3) . ?
 S1 O2 1.435(3) . ?
 S1 N1 1.637(3) . ?
 S1 C19 1.751(4) . ?
 O3 C11 1.334(5) . ?
 O3 C12 1.466(4) . ?
 N1 C11 1.283(5) . ?
 C1 H1 0.9500 . ?
 C1 C2 1.393(7) . ?
 C1 C6 1.394(6) . ?
 C2 H2 0.9500 . ?
 C2 C3 1.364(8) . ?
 C3 H3 0.9500 . ?
 C3 C4 1.388(8) . ?
 C4 H4 0.9500 . ?
 C4 C5 1.394(7) . ?
 C5 C6 1.381(6) . ?
 C5 C9 1.502(7) . ?
 C6 C7 1.493(6) . ?
 C7 H7 1.0000 . ?
 C7 C8 1.498(6) . ?
 C7 C10 1.512(5) . ?
 C8 H8 1.0000 . ?
 C8 C9 1.519(6) . ?
 C8 C10 1.559(5) . ?
 C9 H9A 0.9900 . ?
 C9 H9B 0.9900 . ?
 C10 C11 1.481(5) . ?
 C10 C14 1.497(5) . ?
 C12 H12A 0.9900 . ?
 C12 H12B 0.9900 . ?
 C12 C13 1.484(5) . ?
 C13 C14 1.396(5) . ?
 C13 C18 1.392(5) . ?
 C14 C15 1.394(5) . ?
 C15 H15 0.9500 . ?
 C15 C16 1.383(5) . ?
 C16 H16 0.9500 . ?
 C16 C17 1.382(6) . ?
 C17 H17 0.9500 . ?
 C17 C18 1.376(6) . ?
 C18 H18 0.9500 . ?
 C19 C20 1.391(6) . ?
 C19 C24 1.391(6) . ?
 C20 H20 0.9500 . ?
 C20 C21 1.377(6) . ?
 C21 H21 0.9500 . ?
 C21 C22 1.394(7) . ?
 C22 C23 1.393(6) . ?
 C22 C25 1.494(6) . ?
 C23 H23 0.9500 . ?
 C23 C24 1.378(6) . ?
 C24 H24 0.9500 . ?
 C25 H25A 0.9800 . ?
 C25 H25B 0.9800 . ?
 C25 H25C 0.9800 . ?
 S2 O4 1.429(3) . ?
 S2 O5 1.430(3) . ?
 S2 N2 1.645(3) . ?
 S2 C44 1.763(4) . ?
 O6 C36 1.335(5) . ?
 O6 C37 1.462(5) . ?
 N2 C36 1.288(5) . ?
 C26 H26 0.9500 . ?
 C26 C27 1.434(9) . ?
 C26 C31 1.338(7) . ?
 C27 H27 0.9500 . ?
 C27 C28 1.366(10) . ?
 C28 H28 0.9500 . ?
 C28 C29 1.373(9) . ?
 C29 H29 0.9500 . ?
 C29 C30 1.489(8) . ?
 C30 C31 1.344(7) . ?
 C30 C34 1.464(7) . ?
 C31 C32 1.523(7) . ?
 C32 H32 1.0000 . ?
 C32 C33 1.482(7) . ?
 C32 C35 1.485(6) . ?
 C33 H33 1.0000 . ?
 C33 C34 1.517(7) . ?
 C33 C35 1.580(6) . ?
 C34 H34A 0.9900 . ?
 C34 H34B 0.9900 . ?
 C35 C36 1.482(6) . ?
 C35 C39 1.495(6) . ?
 C37 H37A 0.9900 . ?
 C37 H37B 0.9900 . ?
 C37 C38 1.494(6) . ?
 C38 C39 1.375(6) . ?
 C38 C43 1.393(6) . ?
 C39 C40 1.374(7) . ?
 C40 H40 0.9500 . ?
 C40 C41 1.386(7) . ?
 C41 H41 0.9500 . ?
 C41 C42 1.369(7) . ?
 C42 H42 0.9500 . ?
 C42 C43 1.379(7) . ?
 C43 H43 0.9500 . ?
 C44 C45 1.376(6) . ?
 C44 C49 1.376(6) . ?
 C45 H45 0.9500 . ?
 C45 C46 1.381(7) . ?
 C46 H46 0.9500 . ?
 C46 C47 1.381(6) . ?
 C47 C48 1.383(6) . ?
 C47 C50 1.499(7) . ?
 C48 H48 0.9500 . ?
 C48 C49 1.368(7) . ?
 C49 H49 0.9500 . ?
 C50 H50A 0.9800 . ?
 C50 H50B 0.9800 . ?
 C50 H50C 0.9800 . ?

loop_
  _geom_angle_atom_site_label_1
  _geom_angle_atom_site_label_2
  _geom_angle_atom_site_label_3
  _geom_angle
  _geom_angle_site_symmetry_1
  _geom_angle_site_symmetry_3
  _geom_angle_publ_flag
 O1 S1 N1 111.12(16) . . ?
 O1 S1 C19 109.31(18) . . ?
 O2 S1 O1 117.39(17) . . ?
 O2 S1 N1 104.42(16) . . ?
 O2 S1 C19 107.27(17) . . ?
 N1 S1 C19 106.74(17) . . ?
 C11 O3 C12 116.6(3) . . ?
 C11 N1 S1 122.9(3) . . ?
 C2 C1 H1 120.9 . . ?
 C2 C1 C6 118.1(4) . . ?
 C6 C1 H1 120.9 . . ?
 C1 C2 H2 119.7 . . ?
 C3 C2 C1 120.7(5) . . ?
 C3 C2 H2 119.7 . . ?
 C2 C3 H3 119.4 . . ?
 C2 C3 C4 121.3(5) . . ?
 C4 C3 H3 119.4 . . ?
 C3 C4 H4 120.5 . . ?
 C3 C4 C5 118.9(5) . . ?
 C5 C4 H4 120.5 . . ?
 C4 C5 C9 129.4(4) . . ?
 C6 C5 C4 119.6(5) . . ?
 C6 C5 C9 111.0(4) . . ?
 C1 C6 C7 127.7(4) . . ?
 C5 C6 C1 121.4(4) . . ?
 C5 C6 C7 110.9(4) . . ?
 C6 C7 H7 119.3 . . ?
 C6 C7 C8 105.1(3) . . ?
 C6 C7 C10 117.1(3) . . ?
 C8 C7 H7 119.3 . . ?
 C8 C7 C10 62.4(3) . . ?
 C10 C7 H7 119.3 . . ?
 C7 C8 H8 118.5 . . ?
 C7 C8 C9 108.8(4) . . ?
 C7 C8 C10 59.2(2) . . ?
 C9 C8 H8 118.5 . . ?
 C9 C8 C10 118.7(3) . . ?
 C10 C8 H8 118.5 . . ?
 C5 C9 C8 104.1(3) . . ?
 C5 C9 H9A 110.9 . . ?
 C5 C9 H9B 110.9 . . ?
 C8 C9 H9A 110.9 . . ?
 C8 C9 H9B 110.9 . . ?
 H9A C9 H9B 109.0 . . ?
 C7 C10 C8 58.4(3) . . ?
 C11 C10 C7 115.0(3) . . ?
 C11 C10 C8 108.8(3) . . ?
 C11 C10 C14 113.0(3) . . ?
 C14 C10 C7 126.7(3) . . ?
 C14 C10 C8 123.3(3) . . ?
 O3 C11 C10 118.2(3) . . ?
 N1 C11 O3 120.9(4) . . ?
 N1 C11 C10 120.8(3) . . ?
 O3 C12 H12A 109.4 . . ?
 O3 C12 H12B 109.4 . . ?
 O3 C12 C13 111.2(3) . . ?
 H12A C12 H12B 108.0 . . ?
 C13 C12 H12A 109.4 . . ?
 C13 C12 H12B 109.4 . . ?
 C14 C13 C12 116.3(3) . . ?
 C18 C13 C12 122.2(4) . . ?
 C18 C13 C14 121.4(4) . . ?
 C13 C14 C10 115.2(3) . . ?
 C15 C14 C10 126.7(3) . . ?
 C15 C14 C13 117.9(3) . . ?
 C14 C15 H15 119.9 . . ?
 C16 C15 C14 120.3(4) . . ?
 C16 C15 H15 119.9 . . ?
 C15 C16 H16 119.5 . . ?
 C17 C16 C15 121.0(4) . . ?
 C17 C16 H16 119.5 . . ?
 C16 C17 H17 120.2 . . ?
 C18 C17 C16 119.7(4) . . ?
 C18 C17 H17 120.2 . . ?
 C13 C18 H18 120.2 . . ?
 C17 C18 C13 119.6(4) . . ?
 C17 C18 H18 120.2 . . ?
 C20 C19 S1 119.6(3) . . ?
 C20 C19 C24 119.7(4) . . ?
 C24 C19 S1 120.6(3) . . ?
 C19 C20 H20 120.1 . . ?
 C21 C20 C19 119.8(4) . . ?
 C21 C20 H20 120.1 . . ?
 C20 C21 H21 119.4 . . ?
 C20 C21 C22 121.3(4) . . ?
 C22 C21 H21 119.4 . . ?
 C21 C22 C25 120.7(4) . . ?
 C23 C22 C21 118.2(4) . . ?
 C23 C22 C25 121.1(4) . . ?
 C22 C23 H23 119.4 . . ?
 C24 C23 C22 121.1(4) . . ?
 C24 C23 H23 119.4 . . ?
 C19 C24 H24 120.1 . . ?
 C23 C24 C19 119.8(4) . . ?
 C23 C24 H24 120.1 . . ?
 C22 C25 H25A 109.5 . . ?
 C22 C25 H25B 109.5 . . ?
 C22 C25 H25C 109.5 . . ?
 H25A C25 H25B 109.5 . . ?
 H25A C25 H25C 109.5 . . ?
 H25B C25 H25C 109.5 . . ?
 O4 S2 O5 117.7(2) . . ?
 O4 S2 N2 110.05(18) . . ?
 O4 S2 C44 107.65(18) . . ?
 O5 S2 N2 111.32(19) . . ?
 O5 S2 C44 107.63(19) . . ?
 N2 S2 C44 101.11(18) . . ?
 C36 O6 C37 117.0(3) . . ?
 C36 N2 S2 118.0(3) . . ?
 C27 C26 H26 122.1 . . ?
 C31 C26 H26 122.1 . . ?
 C31 C26 C27 115.8(6) . . ?
 C26 C27 H27 120.1 . . ?
 C28 C27 C26 119.8(6) . . ?
 C28 C27 H27 120.1 . . ?
 C27 C28 H28 117.7 . . ?
 C27 C28 C29 124.7(6) . . ?
 C29 C28 H28 117.7 . . ?
 C28 C29 H29 122.8 . . ?
 C28 C29 C30 114.5(6) . . ?
 C30 C29 H29 122.8 . . ?
 C31 C30 C29 118.2(5) . . ?
 C31 C30 C34 117.7(5) . . ?
 C34 C30 C29 124.0(5) . . ?
 C26 C31 C30 127.0(6) . . ?
 C26 C31 C32 126.9(5) . . ?
 C30 C31 C32 106.1(5) . . ?
 C31 C32 H32 119.4 . . ?
 C33 C32 C31 105.5(5) . . ?
 C33 C32 H32 119.4 . . ?
 C33 C32 C35 64.4(3) . . ?
 C35 C32 C31 115.8(4) . . ?
 C35 C32 H32 119.4 . . ?
 C32 C33 H33 119.0 . . ?
 C32 C33 C34 109.9(4) . . ?
 C32 C33 C35 57.9(3) . . ?
 C34 C33 H33 119.0 . . ?
 C34 C33 C35 117.1(4) . . ?
 C35 C33 H33 119.0 . . ?
 C30 C34 C33 100.7(4) . . ?
 C30 C34 H34A 111.6 . . ?
 C30 C34 H34B 111.6 . . ?
 C33 C34 H34A 111.6 . . ?
 C33 C34 H34B 111.6 . . ?
 H34A C34 H34B 109.4 . . ?
 C32 C35 C33 57.7(3) . . ?
 C32 C35 C39 128.0(4) . . ?
 C36 C35 C32 117.2(4) . . ?
 C36 C35 C33 105.7(4) . . ?
 C36 C35 C39 112.2(4) . . ?
 C39 C35 C33 122.3(4) . . ?
 O6 C36 C35 115.6(4) . . ?
 N2 C36 O6 121.3(4) . . ?
 N2 C36 C35 123.0(4) . . ?
 O6 C37 H37A 109.8 . . ?
 O6 C37 H37B 109.8 . . ?
 O6 C37 C38 109.5(4) . . ?
 H37A C37 H37B 108.2 . . ?
 C38 C37 H37A 109.8 . . ?
 C38 C37 H37B 109.8 . . ?
 C39 C38 C37 115.9(4) . . ?
 C39 C38 C43 121.1(4) . . ?
 C43 C38 C37 122.9(4) . . ?
 C38 C39 C35 114.6(4) . . ?
 C40 C39 C35 126.2(4) . . ?
 C40 C39 C38 119.1(4) . . ?
 C39 C40 H40 120.0 . . ?
 C39 C40 C41 120.0(5) . . ?
 C41 C40 H40 120.0 . . ?
 C40 C41 H41 119.5 . . ?
 C42 C41 C40 120.9(5) . . ?
 C42 C41 H41 119.5 . . ?
 C41 C42 H42 120.2 . . ?
 C41 C42 C43 119.7(4) . . ?
 C43 C42 H42 120.2 . . ?
 C38 C43 H43 120.4 . . ?
 C42 C43 C38 119.2(5) . . ?
 C42 C43 H43 120.4 . . ?
 C45 C44 S2 121.4(3) . . ?
 C45 C44 C49 119.7(4) . . ?
 C49 C44 S2 118.6(3) . . ?
 C44 C45 H45 120.4 . . ?
 C44 C45 C46 119.2(4) . . ?
 C46 C45 H45 120.4 . . ?
 C45 C46 H46 119.0 . . ?
 C45 C46 C47 121.9(4) . . ?
 C47 C46 H46 119.0 . . ?
 C46 C47 C48 117.5(4) . . ?
 C46 C47 C50 122.3(4) . . ?
 C48 C47 C50 120.2(4) . . ?
 C47 C48 H48 119.4 . . ?
 C49 C48 C47 121.2(4) . . ?
 C49 C48 H48 119.4 . . ?
 C44 C49 H49 119.8 . . ?
 C48 C49 C44 120.5(4) . . ?
 C48 C49 H49 119.8 . . ?
 C47 C50 H50A 109.5 . . ?
 C47 C50 H50B 109.5 . . ?
 C47 C50 H50C 109.5 . . ?
 H50A C50 H50B 109.5 . . ?
 H50A C50 H50C 109.5 . . ?
 H50B C50 H50C 109.5 . . ?

_shelx_res_file
;
TITL 170628_RAN3_186_1 in P-1 #2
    170628_ran3_186_1.res
    created by SHELXL-2016/6 at 17:09:48 on 29-Jun-2017
REM reset to P-1 #2
CELL 0.71073 8.30608 15.80002 16.42843 96.4238 101.2611 103.5426
ZERR 4 0.00054 0.00102 0.00113 0.0055 0.0056 0.0056
LATT 1
SFAC C H N O S
UNIT 100 84 4 12 4

L.S. 4
PLAN  20
SIZE 0.48 0.32 0.18
TEMP -103.15
BOND $h
htab
fmap 2
acta
SHEL 999 0.83
OMIT 4 -14 4
OMIT 3 -14 2
OMIT 5 -12 1
OMIT -3 15 0
OMIT 5 -12 4
OMIT 0 -15 1
OMIT -6 13 0
OMIT 8 -10 2
OMIT 6 -13 2
REM <olex2.extras>
REM <HklSrc "%.\\170628_RAN3_186_1.hkl">
REM </olex2.extras>

WGHT    0.130700    1.934300
FVAR       4.89469
S1    5    0.688960    0.605892    0.235038    11.00000    0.02689    0.03556 =
         0.03015    0.00149    0.00687    0.01013
O1    4    0.803694    0.678517    0.213341    11.00000    0.03761    0.03593 =
         0.03796    0.00646    0.01098    0.00815
O2    4    0.516239    0.609980    0.228624    11.00000    0.03000    0.04814 =
         0.04048    0.00053    0.00880    0.01737
O3    4    0.959417    0.529490    0.208532    11.00000    0.02119    0.03772 =
         0.03486   -0.00310    0.00491    0.00645
N1    3    0.673359    0.513107    0.174829    11.00000    0.02354    0.03871 =
         0.03277    0.00018    0.00814    0.00978
C1    1    0.471137    0.246409   -0.061376    11.00000    0.02895    0.04364 =
         0.05021    0.00036    0.00194    0.00272
AFIX  43
H1    2    0.413726    0.287903   -0.081755    11.00000   -1.20000
AFIX   0
C2    1    0.462613    0.168653   -0.113215    11.00000    0.04615    0.06211 =
         0.04958   -0.01011    0.00369    0.00410
AFIX  43
H2    2    0.401387    0.157671   -0.170236    11.00000   -1.20000
AFIX   0
C3    1    0.541256    0.108147   -0.082946    11.00000    0.06085    0.04715 =
         0.07053   -0.01131    0.01390    0.00850
AFIX  43
H3    2    0.532353    0.055109   -0.119072    11.00000   -1.20000
AFIX   0
C4    1    0.634070    0.122573   -0.000357    11.00000    0.05373    0.03546 =
         0.08244    0.00556    0.02384    0.01304
AFIX  43
H4    2    0.688189    0.079918    0.020073    11.00000   -1.20000
AFIX   0
C5    1    0.646571    0.200672    0.052118    11.00000    0.03155    0.03369 =
         0.05801    0.01047    0.01538    0.00544
C6    1    0.566237    0.261604    0.021204    11.00000    0.02306    0.03627 =
         0.04709    0.00429    0.01060   -0.00030
C7    1    0.599695    0.341165    0.086610    11.00000    0.02103    0.03769 =
         0.04069    0.00289    0.01005    0.00714
AFIX  13
H7    2    0.504313    0.367954    0.093364    11.00000   -1.20000
AFIX   0
C8    1    0.709519    0.322788    0.162813    11.00000    0.02966    0.04170 =
         0.03703    0.01184    0.01252    0.00642
AFIX  13
H8    2    0.686808    0.339635    0.219162    11.00000   -1.20000
AFIX   0
C9    1    0.741179    0.232828    0.142163    11.00000    0.03638    0.04792 =
         0.05422    0.02331    0.01454    0.00981
AFIX  23
H9A   2    0.864224    0.237883    0.148501    11.00000   -1.20000
H9B   2    0.696588    0.192389    0.179211    11.00000   -1.20000
AFIX   0
C10   1    0.780940    0.397718    0.115072    11.00000    0.02703    0.02991 =
         0.02748    0.00316    0.00551    0.00947
C11   1    0.802595    0.484126    0.167286    11.00000    0.02252    0.03844 =
         0.02750    0.00656    0.00862    0.00610
C12   1    1.095196    0.485268    0.204822    11.00000    0.02494    0.04481 =
         0.03740    0.00227    0.00437    0.01441
AFIX  23
H12A  2    1.086513    0.439146    0.241069    11.00000   -1.20000
H12B  2    1.207094    0.528741    0.226692    11.00000   -1.20000
AFIX   0
C13   1    1.083986    0.444329    0.117386    11.00000    0.02570    0.02805 =
         0.03353    0.00538    0.00681    0.00918
C14   1    0.922283    0.396707    0.071037    11.00000    0.02444    0.02325 =
         0.03177    0.00905    0.00763    0.01050
C15   1    0.906139    0.359356   -0.012135    11.00000    0.02873    0.03414 =
         0.03187    0.00524    0.00179    0.00906
AFIX  43
H15   2    0.796893    0.329208   -0.046147    11.00000   -1.20000
AFIX   0
C16   1    1.048500    0.366012   -0.045334    11.00000    0.03675    0.04138 =
         0.03046    0.00653    0.01151    0.01476
AFIX  43
H16   2    1.036420    0.338167   -0.101326    11.00000   -1.20000
AFIX   0
C17   1    1.208053    0.412543    0.001687    11.00000    0.03062    0.04090 =
         0.04088    0.01014    0.01419    0.01598
AFIX  43
H17   2    1.304728    0.416794   -0.021953    11.00000   -1.20000
AFIX   0
C18   1    1.226128    0.452663    0.082892    11.00000    0.02170    0.03631 =
         0.04303    0.00815    0.00549    0.01068
AFIX  43
H18   2    1.334955    0.485856    0.115236    11.00000   -1.20000
AFIX   0
C19   1    0.768880    0.593297    0.338516    11.00000    0.02796    0.02832 =
         0.03341    0.00115    0.00713    0.00882
C20   1    0.670611    0.532681    0.376336    11.00000    0.03358    0.03665 =
         0.03992    0.00575    0.00961    0.00514
AFIX  43
H20   2    0.564633    0.495230    0.344827    11.00000   -1.20000
AFIX   0
C21   1    0.727494    0.527147    0.459630    11.00000    0.04800    0.04982 =
         0.04701    0.01644    0.02032    0.01424
AFIX  43
H21   2    0.659643    0.485734    0.485150    11.00000   -1.20000
AFIX   0
C22   1    0.882688    0.581136    0.507191    11.00000    0.03932    0.04575 =
         0.04025    0.00581    0.00991    0.01978
C23   1    0.981320    0.639960    0.467776    11.00000    0.03674    0.04649 =
         0.03445    0.00026    0.00418    0.00874
AFIX  43
H23   2    1.088757    0.676280    0.498799    11.00000   -1.20000
AFIX   0
C24   1    0.925774    0.646400    0.384537    11.00000    0.02730    0.03820 =
         0.04113    0.00408    0.00830    0.00595
AFIX  43
H24   2    0.994482    0.687012    0.358658    11.00000   -1.20000
AFIX   0
C25   1    0.939085    0.577459    0.598521    11.00000    0.06255    0.06729 =
         0.03730    0.01430    0.01312    0.03119
AFIX 137
H25A  2    1.060719    0.606984    0.618028    11.00000   -1.50000
H25B  2    0.918920    0.515708    0.606786    11.00000   -1.50000
H25C  2    0.874611    0.607273    0.630661    11.00000   -1.50000
AFIX   0

S2    5    0.466038    0.267580    0.351932    11.00000    0.03167    0.03675 =
         0.03841    0.00827    0.00912    0.00588
O4    4    0.642791    0.284310    0.351965    11.00000    0.03058    0.06346 =
         0.04604    0.01181    0.00868    0.00140
O5    4    0.403126    0.341362    0.375360    11.00000    0.05894    0.03783 =
         0.05105    0.00591    0.00916    0.01462
O6    4    0.574216    0.282680    0.525197    11.00000    0.05208    0.03292 =
         0.03664    0.00026    0.00654    0.00620
N2    3    0.412593    0.188291    0.406256    11.00000    0.03113    0.04011 =
         0.03981    0.00917    0.00810    0.00405
C26   1    0.193230   -0.079296    0.548716    11.00000    0.05190    0.04907 =
         0.09177    0.00428   -0.01038    0.01466
AFIX  43
H26   2    0.217849   -0.105001    0.499047    11.00000   -1.20000
AFIX   0
C27   1    0.148570   -0.129803    0.612056    11.00000    0.05539    0.05615 =
         0.10769    0.02912    0.00187    0.00714
AFIX  43
H27   2    0.139066   -0.191417    0.604303    11.00000   -1.20000
AFIX   0
C28   1    0.119717   -0.089047    0.683612    11.00000    0.06905    0.05402 =
         0.09549    0.03671   -0.01791    0.00734
AFIX  43
H28   2    0.096716   -0.123726    0.725714    11.00000   -1.20000
AFIX   0
C29   1    0.121587   -0.001582    0.699019    11.00000    0.04353    0.07456 =
         0.08513    0.03860   -0.00463   -0.00634
AFIX  43
H29   2    0.095480    0.024244    0.748202    11.00000   -1.20000
AFIX   0
C30   1    0.167881    0.049481    0.632333    11.00000    0.03171    0.03609 =
         0.07149    0.00592   -0.00649    0.00412
C31   1    0.198039    0.006330    0.563988    11.00000    0.02768    0.05802 =
         0.06758   -0.00712    0.00150    0.00088
C32   1    0.243970    0.075171    0.508561    11.00000    0.03294    0.05542 =
         0.06478    0.03184   -0.01110   -0.01324
AFIX  13
H32   2    0.199880    0.059329    0.446184    11.00000   -1.20000
AFIX   0
C33   1    0.227789    0.158627    0.552997    11.00000    0.03746    0.06266 =
         0.05590    0.01399    0.01193    0.00897
AFIX  13
H33   2    0.177960    0.199117    0.519344    11.00000   -1.20000
AFIX   0
C34   1    0.177486    0.143522    0.635231    11.00000    0.05042    0.05318 =
         0.06705    0.00738    0.01354    0.00988
AFIX  23
H34A  2    0.264813    0.180043    0.684283    11.00000   -1.20000
H34B  2    0.066313    0.155682    0.636560    11.00000   -1.20000
AFIX   0
C35   1    0.405724    0.144582    0.543369    11.00000    0.03148    0.05343 =
         0.04327    0.01387    0.00352   -0.00140
C36   1    0.465429    0.205775    0.486943    11.00000    0.02629    0.04510 =
         0.03660    0.00981    0.01102    0.00665
C37   1    0.597354    0.304300    0.616350    11.00000    0.06409    0.04755 =
         0.04149   -0.00132    0.00598    0.01713
AFIX  23
H37A  2    0.491855    0.315023    0.629630    11.00000   -1.20000
H37B  2    0.690660    0.358707    0.638558    11.00000   -1.20000
AFIX   0
C38   1    0.639126    0.229546    0.656717    11.00000    0.03733    0.04775 =
         0.03153    0.00486    0.01199    0.00827
C39   1    0.543823    0.146379    0.617573    11.00000    0.02378    0.05259 =
         0.04410    0.01443    0.00741   -0.00054
C40   1    0.585977    0.074191    0.646300    11.00000    0.04157    0.04778 =
         0.05660    0.01787   -0.00335   -0.00580
AFIX  43
H40   2    0.523588    0.016355    0.618750    11.00000   -1.20000
AFIX   0
C41   1    0.719537    0.085785    0.715478    11.00000    0.04562    0.05815 =
         0.06672    0.02970   -0.00713   -0.00068
AFIX  43
H41   2    0.747614    0.035589    0.735160    11.00000   -1.20000
AFIX   0
C42   1    0.811550    0.168579    0.755830    11.00000    0.03285    0.06664 =
         0.05684    0.02401   -0.00360   -0.00054
AFIX  43
H42   2    0.902114    0.175701    0.803506    11.00000   -1.20000
AFIX   0
C43   1    0.772109    0.241599    0.726923    11.00000    0.04241    0.05905 =
         0.03689    0.00441    0.00365   -0.00240
AFIX  43
H43   2    0.834815    0.299366    0.754528    11.00000   -1.20000
AFIX   0
C44   1    0.349648    0.216453    0.249597    11.00000    0.02521    0.03777 =
         0.04218    0.01584    0.01125    0.00792
C45   1    0.363360    0.136057    0.214251    11.00000    0.03836    0.03538 =
         0.05888    0.01266    0.00043    0.01536
AFIX  43
H45   2    0.427723    0.103917    0.246589    11.00000   -1.20000
AFIX   0
C46   1    0.282430    0.102633    0.131189    11.00000    0.04829    0.03702 =
         0.05753    0.00209    0.00124    0.01199
AFIX  43
H46   2    0.290609    0.046675    0.107176    11.00000   -1.20000
AFIX   0
C47   1    0.189929    0.148193    0.081998    11.00000    0.03210    0.04192 =
         0.04324    0.01068    0.00844    0.00087
C48   1    0.179040    0.228982    0.119290    11.00000    0.04605    0.05026 =
         0.04758    0.01838    0.00692    0.02056
AFIX  43
H48   2    0.116234    0.261813    0.087021    11.00000   -1.20000
AFIX   0
C49   1    0.256981    0.262484    0.201734    11.00000    0.04944    0.04372 =
         0.04963    0.01015    0.01280    0.02418
AFIX  43
H49   2    0.247078    0.317916    0.226125    11.00000   -1.20000
AFIX   0
C50   1    0.107580    0.114086   -0.009135    11.00000    0.04678    0.05885 =
         0.04772    0.00689    0.00094   -0.00104
AFIX 137
H50A  2   -0.016044    0.094388   -0.016204    11.00000   -1.50000
H50B  2    0.149905    0.064354   -0.028610    11.00000   -1.50000
H50C  2    0.135039    0.161214   -0.042177    11.00000   -1.50000
AFIX   0
HKLF 4


REM  170628_RAN3_186_1 in P-1 #2
REM R1 =  0.0855 for    5282 Fo > 4sig(Fo)  and  0.1123 for all    7374 data
REM    543 parameters refined using      0 restraints

END

WGHT      0.1307      1.9343

REM Instructions for potential hydrogen bonds
EQIV $1 x+1, y, z
HTAB C12 O2_$1
HTAB C20 O5
EQIV $2 -x+1, -y+1, -z+1
HTAB C37 O2_$2

REM Highest difference peak  1.097,  deepest hole -0.651,  1-sigma level  0.097
Q1    1   0.1364  0.0922  0.6845  11.00000  0.05    1.10
Q2    1   0.2623 -0.0419  0.5139  11.00000  0.05    0.84
Q3    1   0.1984 -0.0345  0.6035  11.00000  0.05    0.83
Q4    1   0.1322 -0.0437  0.7378  11.00000  0.05    0.81
Q5    1   0.2794  0.0216  0.4803  11.00000  0.05    0.79
Q6    1   0.7024  0.5407  0.2199  11.00000  0.05    0.61
Q7    1   0.1961 -0.0677  0.6581  11.00000  0.05    0.48
Q8    1   0.6462  0.6592  0.2198  11.00000  0.05    0.47
Q9    1   0.4164  0.3228  0.3376  11.00000  0.05    0.46
Q10   1   0.4410  0.3316  0.3751  11.00000  0.05    0.42
Q11   1   0.7096  0.6169  0.2999  11.00000  0.05    0.42
Q12   1   0.4723  0.2004  0.3283  11.00000  0.05    0.42
Q13   1   0.5096  0.2162  0.3739  11.00000  0.05    0.41
Q14   1   0.6751  0.5686  0.1809  11.00000  0.05    0.40
Q15   1   0.1778  0.0262  0.6373  11.00000  0.05    0.40
Q16   1   0.2267  0.0965  0.5565  11.00000  0.05    0.37
Q17   1   0.1697  0.0613  0.5921  11.00000  0.05    0.37
Q18   1   0.6959  0.2402  0.3728  11.00000  0.05    0.35
Q19   1   0.1853  0.1932  0.0848  11.00000  0.05    0.35
Q20   1   0.6636  0.2573  0.0985  11.00000  0.05    0.34
;
_shelx_res_checksum               32413
_shelx_hkl_file
;
   0   0   3 11564.3 538.052   2
   0   0   4 10550.8 612.982   2
   0   0   5 69601.1 1772.33   2
   0   0   5 58807.6 1759.09   1
   0   0   6 2066.29 338.020   2
   0   0   6 2140.46 371.795   1
   0   0   7 268261. 4051.09   2
   0   0   7 244847. 4264.65   1
   0   0   8 127805. 3317.09   1
   0   0   9 21281.5 1421.80   1
   0   0  10 1053.55 354.096   1
   0   0  11 6317.79 887.362   1
   0   0 -11 7142.20 819.565   2
   0   0  12 732.680 286.070   1
   0   0  13 8219.02 1102.76   1
   0   0  14 3201.75 743.533   1
   0   0  15 149.840 264.350   1
   0   0  16 795.874 399.365   1
   0   0  17 6458.87 1114.78   1
   0   0  18 2027.17 665.817   1
   0   0  19 1164.81 511.161   1
   0   0  20-102.182 343.872   1
   0  -1  20 4421.55 1061.21   1
   0  -1  19 1773.54 628.999   1
   0  -1  18 995.606 459.782   1
   0  -1  17-126.344 307.008   1
   0  -1  16 1172.35 636.410   1
   0  -1  15 6640.51 1057.02   1
   0  -1  14 1524.94 483.952   1
   0  -1  13 4340.11 795.169   1
   0  -1  12 4230.87 760.033   1
   0   1 -11 1276.21 375.587   2
   0  -1  11 741.001 325.960   1
   0  -1  10 708.089 362.599   1
   0  -1  10 478.472 211.668   2
   0   1 -10 471.151 232.026   2
   0  -1   9 14428.1 1153.42   1
   0  -1   9 11554.7 968.037   2
   0  -1   8 694.602 273.994   2
   0  -1   7 48604.2 1744.27   2
   0  -1   6 157.612 179.971   2
   0  -1   5 537639. 4896.09   2
   0  -1   4 11187.8 632.095   2
   0  -1   3 413431. 3238.23   2
   0   1   3 646.357 175.146   1
   0   1   4 7185.90 557.239   1
   0   1   5 10289.6 744.917   1
   0   1   6 503.620 190.268   1
   0   1   7 99584.5 2756.66   1
   0   1   8 10826.1 982.130   1
   0   1   9 1440.81 380.337   1
   0   1  10 1121.61 331.684   1
   0  -1 -11 9185.64 1005.54   2
   0   1  11 10129.0 1088.04   1
   0   1  12 8904.92 1082.59   1
   0   1  13 2803.50 597.024   1
   0   1  14 8320.31 1132.09   1
   0   1  15 1021.12 422.731   1
   0   1  16 1920.99 573.384   1
   0   1  17 5883.78 1131.34   1
   0   1  18 2017.75 689.582   1
   0   1  19 4273.51 985.068   1
   0  -2  20 5345.18 1106.58   1
   0  -2  19 20.5871 258.951   1
   0  -2  18 2046.35 682.551   1
   0  -2  17 3356.28 801.317   1
   0  -2  16 928.827 437.463   1
   0  -2  15 2442.98 666.319   1
   0  -2  14 1317.89 481.454   1
   0  -2  13 9991.48 1181.78   1
   0  -2  12 29452.2 1930.66   1
   0  -2  11 533.484 290.455   2
   0   2 -11 625.486 276.520   2
   0   2 -10 104277. 3049.19   2
   0  -2  10 97642.3 2932.28   2
   0   2  -9 3028.22 482.223   2
   0  -2   9 3484.65 529.898   2
   0  -2   8 26142.0 1384.05   2
   0   2  -8 25258.3 1322.49   2
   0  -2   7 36483.1 1531.35   2
   0  -2   6 18309.3 989.279   2
   0  -2   5 104661. 2214.23   2
   0  -2   4 16956.7 790.444   2
   0  -2   3 357394. 3194.49   2
   0  -2   2 1039.56 141.639   3
   0   2   1 9411.79 476.340   1
   0   2   2 8224.32 498.439   1
   0  -2  -2 8928.15 536.392   3
   0   2   3 14996.0 760.657   1
   0   2   4 100736. 2258.54   1
   0   2   5 52290.9 1747.41   1
   0   2   6 25861.0 1317.13   1
   0   2   7 9682.53 852.044   1
   0   2   8 7245.11 794.615   1
   0   2   9 542.434 233.660   1
   0   2  10 1682.90 421.010   1
   0   2  11 1929.12 511.776   1
   0   2  12 30511.8 2019.35   1
   0   2  13 2673.01 634.659   1
   0   2  14 1830.89 525.748   1
   0   2  15 840.537 398.269   1
   0   2  16 3918.23 902.736   1
   0   2  17 149.208 171.986   1
   0   2  18 395.358 316.661   1
   0   2  19-643.241 458.065   1
   0   3 -21 451.524 335.180   3
   0  -3  20-94.2470 263.232   1
   0   3 -20 15.8860 124.549   3
   0  -3  19 1555.87 609.229   1
   0   3 -19 2081.06 614.343   3
   0  -3  18 3630.57 905.349   1
   0  -3  17 506.034 350.310   1
   0  -3  16 2884.35 752.918   1
   0  -3  15 12273.5 1457.62   1
   0  -3  14 647.874 505.535   1
   0  -3  13 2499.77 514.558   2
   0   3 -12 6706.84 903.707   2
   0  -3  12 5991.47 799.518   2
   0  -3  11 1496.64 386.138   2
   0   3 -11 1779.27 420.030   2
   0  -3  10 20946.3 1367.22   2
   0   3 -10 23507.8 1493.15   2
   0   3  -9 55634.4 2173.69   2
   0  -3   9 52366.7 2074.94   2
   0   3  -8 35550.7 1615.95   2
   0  -3   8 35033.1 1610.45   2
   0   3  -7 26894.7 1313.21   2
   0  -3   7 28600.1 1367.21   2
   0   3  -7 27284.6 1246.12   3
   0   3  -6 66611.9 1895.74   2
   0   3  -6 66154.1 1802.14   3
   0   3  -5 1509.51 249.426   3
   0   3  -5 1522.95 244.946   2
   0  -3   5 1856.49 304.703   2
   0  -3   4 3735.75 378.669   2
   0  -3   4 3319.60 344.872   3
   0   3  -4 3094.51 317.053   2
   0   3  -3 185104. 2182.10   2
   0  -3   3 189797. 2433.85   3
   0  -3   3 193817. 2302.17   2
   0  -3   2 30393.2 747.552   2
   0   3  -2 30788.6 766.286   2
   0  -3   2 30301.6 933.883   3
   0  -3   1 241289. 2635.23   3
   0   3  -1 241474. 1951.78   2
   0  -3   0 25188.7 891.912   3
   0   3   0 26621.2 887.191   1
   0  -3  -1 43288.1 1234.32   3
   0   3   1 48087.6 1296.30   1
   0  -3  -2 43438.2 1321.50   3
   0   3   2 44211.2 1314.11   1
   0   3   3 5064.21 477.935   1
   0  -3  -3 6035.71 548.587   3
   0  -3  -4 72.3120 96.7048   3
   0   3   4-19.7019 94.1598   1
   0   3   5 2419.12 415.010   1
   0   3   6 85883.7 2484.06   1
   0   3   7 2687.55 464.807   1
   0   3   8 560.509 243.194   1
   0   3   9 46905.1 2229.35   1
   0   3  10 1274.03 411.041   1
   0  -3 -10 529.157 243.983   2
   0   3  11 7673.08 996.827   1
   0   3  12 640.223 422.914   1
   0   3  13 238.938 205.391   1
   0   3  14 9716.76 1271.50   1
   0   3  15 64.0429 178.220   1
   0   3  16 8223.60 1283.58   1
   0   3  17-116.290 231.845   1
   0   3  18 628.808 408.179   1
   0   3  19 2024.29 694.097   1
   0   4 -21 7351.22 1215.35   3
   0   4 -20 353.912 284.305   3
   0  -4  20 435.644 373.589   1
   0   4 -19 18.9018 221.681   3
   0  -4  19 70.9684 157.628   1
   0   4 -18 688.600 415.356   3
   0  -4  18 527.019 374.732   1
   0  -4  17 1027.37 517.094   1
   0   4 -17 1089.19 426.876   3
   0   4 -16 3725.07 725.151   3
   0  -4  16 3343.51 760.303   1
   0  -4  15-247.457 192.726   1
   0   4 -15 157.965 208.228   3
   0  -4  14 16110.3 1442.35   2
   0   4 -14 18352.6 1513.89   3
   0  -4  13 53240.6 2521.26   2
   0   4 -13 63740.2 2691.29   3
   0   4 -12 3573.02 629.410   2
   0  -4  12 2748.78 538.026   2
   0  -4  11 2367.25 485.791   2
   0   4 -11 2131.58 433.842   2
   0   4 -10 562.189 276.442   2
   0   4 -10 41.9339 134.880   3
   0  -4  10 486.186 241.026   2
   0   4  -9 546.817 192.245   3
   0  -4   9 833.135 326.577   2
   0   4  -9 634.455 245.962   2
   0   4  -8 81280.2 2322.36   3
   0  -4   8 79369.7 2400.19   2
   0   4  -8 77494.7 2373.87   2
   0   4  -7 14036.6 922.294   2
   0  -4   7 13897.1 931.747   2
   0   4  -7 14501.4 924.685   3
   0   4  -6 61667.6 1789.50   2
   0   4  -6 63428.5 1824.12   3
   0  -4   6 65599.9 1783.55   2
   0  -4   5 42063.2 1348.20   2
   0   4  -5 43664.5 1382.32   2
   0  -4   5 44026.2 1443.67   3
   0  -4   4 45352.0 1377.76   3
   0   4  -4 47180.2 1422.74   3
   0   4  -4 45004.7 1216.38   2
   0  -4   4 49614.6 1363.86   2
   0  -4   3 116612. 2139.06   3
   0   4  -3 116289. 1780.04   2
   0  -4   3 119033. 1823.67   2
   0  -4   2 127350. 2210.11   3
   0   4  -2 130840. 1686.83   2
   0  -4   2 125486. 1657.99   2
   0  -4   1 10022.5 634.829   3
   0  -4   1 10687.9 489.522   2
   0  -4   0 50395.2 1472.26   3
   0   4   0 50187.1 1403.77   1
   0  -4  -1 36384.5 1285.55   3
   0   4   1 36555.9 1259.99   1
   0  -4  -2 6888.15 594.845   3
   0   4   2 7134.15 593.638   1
   0   4   3 5505.18 552.085   1
   0  -4  -3 5571.47 551.905   3
   0  -4  -4 11208.1 846.755   3
   0   4   4 10241.3 780.427   1
   0  -4  -5 3400.01 488.855   3
   0   4   5 2767.48 413.002   1
   0  -4  -6 35911.2 1663.61   3
   0   4   6 33196.2 1603.62   1
   0   4   7 4283.71 587.702   1
   0  -4  -7 4695.93 641.518   3
   0  -4  -8 2783.43 524.481   3
   0   4   8 2899.40 545.254   1
   0  -4  -9 20073.9 1423.59   3
   0  -4  -9 25417.2 1716.11   2
   0   4   9 24288.9 1635.93   1
   0   4  10 13992.0 1297.10   1
   0  -4 -10 11510.7 1109.62   3
   0  -4 -10 16291.3 1432.63   2
   0  -4 -11 32486.4 1959.78   3
   0   4  11 32265.2 2053.39   1
   0   4  12 7865.05 1062.06   1
   0   4  13 15696.8 1580.55   1
   0   4  14 399.431 249.826   1
   0   4  15 2206.37 635.504   1
   0   4  16 625.270 439.031   1
   0   4  17 300.396 314.781   1
   0   4  18 5828.51 1155.72   1
   0   5 -20-140.945 256.853   3
   0  -5  20 725.174 482.276   1
   0   5 -19 5473.23 975.064   3
   0  -5  19 4831.89 1060.18   1
   0  -5  18 7179.90 1245.96   1
   0   5 -18 5879.43 986.688   3
   0  -5  17 4165.12 932.646   1
   0   5 -17 4204.52 821.679   3
   0   5 -16 1703.75 458.765   3
   0  -5  15 1857.43 518.029   2
   0   5 -15 2494.33 592.319   3
   0   5 -14 2315.03 517.330   3
   0  -5  14 2256.86 550.468   2
   0  -5  13 861.948 349.161   2
   0   5 -13 407.933 200.513   3
   0  -5  12 16470.1 1369.90   2
   0   5 -12 18795.2 1443.31   2
   0   5 -11 32176.8 1822.58   2
   0  -5  11 31487.8 1806.73   2
   0  -5  10 10065.7 976.189   2
   0   5 -10 11084.7 1000.60   2
   0  -5   9 33439.2 1662.36   2
   0   5  -9 37474.0 1685.99   3
   0   5  -9 35699.8 1688.27   2
   0   5  -8 917.374 264.940   2
   0  -5   8 721.752 234.185   2
   0   5  -8 1070.12 262.775   3
   0   5  -7 10246.6 798.333   3
   0   5  -7 10185.5 785.266   2
   0  -5   7 8931.12 743.336   2
   0   5  -6 110989. 2385.30   2
   0  -5   6 107030. 2495.80   3
   0  -5   6 104358. 2330.09   2
   0   5  -5 8909.01 613.069   2
   0  -5   5 8939.80 689.691   3
   0  -5   5 9854.56 678.508   2
   0   5  -5 9398.84 694.465   3
   0  -5   4 11129.8 648.332   2
   0   5  -4 11340.3 743.951   3
   0   5  -4 10569.0 607.643   2
   0  -5   4 10908.7 743.211   3
   0   5  -3 16177.6 691.957   2
   0  -5   3 15467.7 867.103   3
   0  -5   3 14984.0 670.022   2
   0   5  -2 4313.04 336.499   2
   0  -5   2 4554.54 347.170   2
   0  -5   2 4833.61 484.467   3
   0  -5   1 52667.2 1663.61   3
   0  -5   1 54688.4 1250.63   2
   0   5   0 11370.6 743.887   1
   0  -5   0 11770.0 782.379   3
   0   5   1 5574.40 550.099   1
   0  -5  -1 4936.13 536.043   3
   0  -5  -2 1004.86 220.968   3
   0   5   2 1071.39 272.115   1
   0   5   3 8430.84 735.029   1
   0  -5  -3 7903.60 728.933   3
   0   5   4 30888.1 1484.05   1
   0  -5  -4 33202.6 1552.51   3
   0   5   5 12104.9 969.596   1
   0  -5  -5 14281.2 1052.12   3
   0  -5  -6 67510.5 2429.16   3
   0   5   6 59841.8 2225.53   1
   0  -5  -7 2462.48 489.752   3
   0   5   7 2294.02 435.376   1
   0  -5  -8 14978.6 1264.63   2
   0   5   8 13240.0 1178.73   1
   0  -5  -8 14492.3 1223.75   3
   0  -5  -9 4389.14 708.494   3
   0   5   9 5658.10 803.319   1
   0  -5  -9 6094.05 855.998   1
   0  -5  -9 6243.69 842.191   2
   0  -5 -10 18133.4 1475.65   3
   0   5  10 17938.5 1523.29   1
   0   5  11 40578.2 2389.89   1
   0   5  12 1664.01 497.053   1
   0   5  13 312.400 281.854   1
   0   5  14 3162.17 792.992   1
   0   5  15 566.147 363.331   1
   0   5  16 4188.79 892.585   1
   0   5  17 2898.95 830.520   1
   0   5  18 887.565 461.378   1
   0   6 -20-247.433 311.200   3
   0  -6  20-15.6836 159.294   1
   0  -6  19 4656.02 1059.88   1
   0   6 -19 5421.64 949.830   3
   0   6 -18 2985.09 700.931   3
   0  -6  18 3103.36 780.684   1
   0   6 -17 2621.27 644.716   3
   0   6 -16 5380.68 874.481   3
   0  -6  15 9303.35 1161.42   2
   0   6 -15 11503.6 1248.20   3
   0   6 -14 16097.2 1387.72   3
   0  -6  14 12430.6 1290.05   2
   0   6 -13 12851.0 1200.43   3
   0  -6  13 11416.4 1181.42   2
   0  -6  12 19297.0 1506.21   2
   0   6 -12 19293.6 1473.20   2
   0  -6  11 31347.6 1823.58   2
   0   6 -11 33122.0 1809.33   2
   0   6 -10 974.537 272.986   2
   0  -6  10 1092.66 282.233   2
   0   6  -9 33407.2 1618.65   2
   0  -6   9 30337.4 1586.88   2
   0   6  -8 5471.41 622.024   3
   0  -6   8 5308.90 636.298   2
   0   6  -8 5916.90 631.223   2
   0  -6   7 2312.23 376.011   2
   0  -6   7 2567.23 414.956   3
   0   6  -7 2732.06 381.074   2
   0   6  -7 2990.14 433.643   3
   0   6  -6 66495.0 1838.38   2
   0  -6   6 67804.2 1963.67   2
   0   6  -6 71261.9 2096.71   3
   0   6  -5 129816. 2735.05   3
   0   6  -5 125972. 2336.85   2
   0  -6   5 127288. 2506.31   2
   0  -6   4 51978.5 1751.32   3
   0  -6   4 55157.2 1475.32   2
   0   6  -4 53226.3 1415.70   2
   0   6  -4 53314.4 1730.47   3
   0  -6   3 2616.61 297.872   2
   0  -6   3 2654.80 401.821   3
   0   6  -3 2707.05 291.706   2
   0  -6   2 129.882 75.8844   2
   0  -6   2 156.742 127.262   3
   0  -6   1 50075.6 1320.92   2
   0  -6   1 48747.3 1780.15   3
   0  -6   0 12192.3 902.466   3
   0   6   0 11321.8 819.012   1
   0   6   1 7705.52 684.099   1
   0  -6  -1 7716.08 722.254   3
   0  -6  -2 3143.30 474.270   3
   0   6   2 2641.98 414.492   1
   0  -6  -3 105543. 2836.82   3
   0   6   3 100478. 2759.82   1
   0   6   4 64.9630 162.258   1
   0  -6  -4 212.266 168.561   3
   0   6   5 13124.6 1061.48   1
   0  -6  -5 13622.3 1098.14   3
   0   6   6 281.264 179.978   1
   0  -6  -6 413.025 226.131   3
   0   6   7 344.868 258.545   1
   0  -6  -7 60.8879 108.463   3
   0  -6  -7 158.553 91.7770   2
   0  -6  -8 33423.6 1914.81   3
   0   6   8 32518.1 1883.79   1
   0  -6  -8 28818.8 1828.85   2
   0  -6  -8 34975.6 2060.68   1
   0  -6  -9 1137.37 414.217   2
   0   6   9 1463.24 453.547   1
   0  -6  -9 1358.50 420.076   3
   0   6  10 30914.7 1991.13   1
   0   6  11 810.696 392.652   1
   0   6  12 2292.23 612.102   1
   0   6  13 4564.98 860.936   1
   0   6  14 2021.69 550.774   1
   0   6  15-120.847 282.750   1
   0   6  16 1518.39 601.783   1
   0   6  17 9104.96 1423.25   1
   0   7 -20 1328.09 473.666   3
   0  -7  20 1225.33 560.100   1
   0   7 -19-235.849 236.115   3
   0  -7  19-307.541 288.284   1
   0   7 -18-2.07749 110.239   3
   0   7 -17 161.823 124.101   3
   0  -7  16 3961.59 807.585   2
   0   7 -16 3678.44 728.819   3
   0   7 -15 1616.20 471.635   3
   0  -7  15 1598.61 512.277   2
   0   7 -14 9167.63 1058.48   3
   0  -7  14 7094.19 969.052   2
   0  -7  13 13931.8 1327.66   2
   0   7 -13 15600.5 1319.59   3
   0   7 -12 6237.13 818.902   2
   0   7 -12 7669.58 893.804   3
   0  -7  12 6815.02 867.572   2
   0  -7  11 1608.75 411.759   2
   0   7 -11 1846.42 450.996   2
   0   7 -10 60.2106 109.061   2
   0  -7  10 1.57479 132.774   2
   0  -7   9 5391.72 675.973   2
   0   7  -9 5444.69 643.589   2
   0   7  -8 9177.64 793.031   2
   0  -7   8 8476.29 749.841   2
   0   7  -7 6225.94 662.768   3
   0   7  -7 5482.36 563.023   2
   0  -7   7 5762.12 667.975   3
   0  -7   7 5556.51 595.734   2
   0  -7   6 1372.39 278.403   2
   0   7  -6 1703.88 324.177   3
   0   7  -6 1395.01 271.003   2
   0  -7   6 1684.10 364.071   3
   0   7  -5 41134.5 1646.69   3
   0  -7   5 39496.0 1674.39   3
   0   7  -5 40859.5 1361.76   2
   0  -7   5 41721.0 1473.72   2
   0  -7   4 926.197 282.829   3
   0  -7   4 1135.63 229.136   2
   0   7  -4 1171.59 216.547   2
   0   7  -4 1203.43 305.026   3
   0  -7   3 496.138 186.585   3
   0   7  -3 730.225 174.444   2
   0   7  -3 583.761 202.456   3
   0  -7   3 635.581 157.508   2
   0  -7   2 12674.5 961.097   3
   0  -7   2 13027.8 977.468   1
   0  -7   2 12675.4 698.316   2
   0  -7   1 22818.2 1343.82   3
   0  -7   1 23034.4 982.057   2
   0  -7   1 24346.7 1365.77   1
   0  -7   0 352.605 171.205   3
   0   7   0 336.781 174.263   1
   0   7   1 1141.96 264.080   1
   0  -7  -1 1139.59 320.170   3
   0  -7  -2 673.585 282.489   3
   0   7   2 554.258 199.193   1
   0  -7  -3 32623.9 1692.24   3
   0   7   3 32940.8 1663.04   1
   0  -7  -4 16415.6 1222.27   3
   0   7   4 16113.7 1227.96   1
   0   7   5 20183.1 1427.40   1
   0  -7  -5 19732.8 1398.14   3
   0   7   6-118.407 240.866   1
   0  -7  -6 129.497 143.775   3
   0   7   7-246.430 306.774   1
   0  -7  -7-37.4831 155.244   1
   0  -7  -7-0.47839 183.180   3
   0  -7  -7 45.0945 180.423   2
   0   7   8 73.4241 132.572   1
   0  -7  -8 86.1552 154.996   2
   0  -7  -8 189.181 223.796   3
   0   7   9 12208.5 1264.62   1
   0   7  10 86.6825 220.373   1
   0   7  11 12957.4 1378.19   1
   0   7  12 9600.65 1283.17   1
   0   7  13 7671.03 1151.71   1
   0   7  14-373.886 289.026   1
   0   7  15 749.622 412.155   1
   0   7  16 1150.55 437.159   1
   0   7  17 1212.45 546.829   1
   0  -8  20 1543.78 587.507   1
   0   8 -19 593.289 356.173   3
   0   8 -18 108.684 167.241   3
   0   8 -17 478.820 319.389   3
   0   8 -16 754.666 310.568   3
   0  -8  16 501.315 234.209   2
   0  -8  15 10344.8 1218.57   2
   0   8 -15 13236.2 1351.27   3
   0  -8  14 3419.87 698.135   2
   0   8 -14 4446.34 751.658   3
   0  -8  13 12.6229 133.802   2
   0   8 -13 5.38383 194.976   3
   0  -8  12 8511.64 990.512   2
   0   8 -12 8583.03 957.733   3
   0   8 -12 7447.85 861.622   2
   0  -8  11 9945.73 1019.92   2
   0   8 -11 10355.1 1018.63   3
   0   8 -11 10148.9 985.638   2
   0   8 -10 16136.8 1178.08   2
   0  -8  10 14920.4 1205.96   2
   0  -8   9 99.0387 90.9875   2
   0   8  -9-26.6311 84.0014   2
   0  -8   8 564.459 252.726   3
   0  -8   8 414.239 195.988   2
   0   8  -8 313.894 148.133   2
   0  -8   7 11477.1 918.057   2
   0  -8   7 10047.4 931.478   3
   0   8  -7 10814.8 809.671   2
   0  -8   6 27051.3 1319.53   2
   0   8  -6 25804.4 1179.90   2
   0  -8   6 24322.2 1425.26   3
   0   8  -5-99.7185 136.440   3
   0   8  -5 218.328 140.719   2
   0  -8   5 111.993 76.1457   2
   0  -8   5 228.237 153.081   3
   0  -8   4 28631.5 1140.48   2
   0   8  -4 26538.7 1412.21   3
   0   8  -4 29327.2 1149.15   2
   0  -8   4 27092.4 1488.88   3
   0  -8   3 13512.1 1103.24   1
   0   8  -3 11519.3 911.172   3
   0  -8   3 13386.5 750.427   2
   0  -8   3 12673.0 1015.43   3
   0  -8   2 18712.2 912.353   2
   0  -8   2 18640.8 1287.10   1
   0  -8   2 17376.7 1224.93   3
   0  -8   1 5144.68 684.854   1
   0  -8   1 5150.97 507.233   2
   0  -8   1 5128.91 688.545   3
   0  -8   0 46781.8 2125.09   3
   0  -8   0 48984.9 2151.27   1
   0   8   0 41693.8 1821.83   1
   0   8   1 41081.6 1831.22   1
   0  -8  -1 45026.3 2090.37   3
   0   8   2-94.7506 142.821   1
   0  -8  -2 231.322 184.057   3
   0   8   3 462.916 248.257   1
   0  -8  -3 716.253 272.861   3
   0  -8  -4 1366.30 413.736   3
   0  -8  -4 1099.04 294.357   1
   0   8   4 1006.35 391.235   1
   0  -8  -5 22377.7 1564.25   3
   0  -8  -5 24515.2 1672.79   1
   0   8   5 22445.0 1588.35   1
   0  -8  -6 5930.56 848.324   1
   0   8   6 5106.91 779.401   1
   0  -8  -6 4866.70 733.924   3
   0   8   7 10557.0 1151.21   1
   0  -8  -7 12025.5 1237.64   1
   0  -8  -7 9084.63 1034.05   2
   0   8   8 420.169 277.468   1
   0  -8  -8 186.904 116.344   2
   0   8   9 16039.6 1523.20   1
   0   8  10 178.834 156.091   1
   0   8  11 857.573 429.063   1
   0   8  12 6358.66 1056.52   1
   0   8  13 3828.97 874.631   1
   0   8  14 7142.88 1222.76   1
   0   8  15 5997.78 1118.82   1
   0   8  16 1485.73 556.084   1
   0   9 -19 504.563 214.901   3
   0   9 -18 41.9344 99.5214   3
   0   9 -17 6298.58 971.641   3
   0  -9  17 5348.70 967.817   2
   0   9 -16 414.420 178.198   3
   0  -9  16-20.2380 117.601   2
   0  -9  15 14335.8 1449.12   2
   0   9 -15 16869.0 1530.32   3
   0  -9  14 58.7577 193.353   2
   0   9 -14 47.9980 112.871   3
   0   9 -13 90.6610 133.909   3
   0  -9  13 74.6343 231.172   2
   0   9 -12-27.9236 76.0866   2
   0   9 -12 237.943 220.438   3
   0  -9  12-153.328 203.626   2
   0  -9  11 891.433 332.789   2
   0   9 -11 1301.59 359.186   2
   0   9 -11 1521.98 397.666   3
   0  -9  10 26748.2 1603.40   2
   0   9 -10 29325.5 1584.25   2
   0   9 -10 28521.8 1687.68   3
   0  -9   9 8734.84 957.098   3
   0   9  -9 10721.2 936.060   2
   0  -9   9 9370.97 856.637   2
   0   9  -8 10342.7 849.910   2
   0  -9   8 9209.73 960.159   3
   0  -9   8 10373.6 897.891   2
   0  -9   7 10417.3 999.812   3
   0  -9   7 13252.3 999.493   2
   0   9  -7 12326.0 886.132   2
   0   9  -6 153.369 71.9337   2
   0  -9   6 256.931 198.245   3
   0  -9   6 289.980 152.304   2
   0   9  -5 31020.4 1278.47   2
   0  -9   5 30871.3 1334.68   2
   0  -9   5 28415.5 1621.50   3
   0   9  -4 31.0811 92.6221   2
   0  -9   4-19.1368 77.5823   2
   0  -9   3 18423.4 1322.18   3
   0  -9   3 18771.9 966.452   2
   0  -9   2 22151.2 1477.31   3
   0  -9   2 23734.0 1100.61   2
   0  -9   1 15776.1 940.699   2
   0  -9   1 14395.6 1242.76   3
   0  -9   0 10455.1 1072.09   3
   0  -9   0 10620.2 807.255   2
   0   9   0 8860.16 881.027   1
   0   9   1 7866.57 845.171   1
   0  -9  -1 9589.40 1043.16   3
   0  -9  -2 762.418 311.863   1
   0  -9  -2 608.622 256.241   3
   0   9   2 281.735 173.144   1
   0   9   3 15466.4 1269.11   1
   0  -9  -3 17898.0 1412.33   1
   0  -9  -3 16366.4 1350.51   3
   0   9   4 9079.99 996.798   1
   0  -9  -4 9516.69 1053.09   3
   0  -9  -4 8177.36 988.637   1
   0  -9  -5 1001.20 345.589   3
   0   9   5 435.436 138.155   1
   0  -9  -5 1128.56 385.864   1
   0   9   6 2120.19 515.592   1
   0   9   7 26962.2 1915.03   1
   0  -9  -7 21150.0 1666.28   2
   0   9   8 2045.95 567.834   1
   0   9   9 1406.16 505.236   1
   0   9  10 3034.60 717.366   1
   0   9  11 318.370 325.956   1
   0   9  12 545.510 321.192   1
   0   9  13-354.752 167.699   1
   0   9  14 96.5568 269.796   1
   0   9  15 135.656 251.845   1
   0   9  16 1260.74 617.922   1
   0  10 -18 81.9076 144.165   3
   0 -10  17 5420.78 966.214   2
   0  10 -17 6348.55 1000.52   3
   0  10 -16 144.023 137.479   3
   0 -10  16 13.5520 175.584   2
   0  10 -15 6300.86 925.297   3
   0 -10  15 5699.10 925.779   2
   0  10 -14 298.061 158.668   3
   0 -10  14-175.816 236.944   2
   0 -10  13 3245.70 690.515   2
   0  10 -13 4789.51 767.697   3
   0  10 -12 697.522 299.008   3
   0 -10  12 1103.05 352.806   2
   0  10 -12 1117.42 347.357   2
   0  10 -11 3446.50 639.811   3
   0  10 -11 3455.09 561.331   2
   0 -10  11 3364.95 612.096   2
   0  10 -10 217.361 188.136   2
   0  10 -10 261.327 136.144   3
   0 -10  10 55.5717 153.936   2
   0 -10   9 7779.90 805.602   2
   0  10  -9 7762.34 882.707   3
   0 -10   9 6166.67 832.477   3
   0  10  -9 8085.33 799.324   2
   0 -10   8 10.2694 125.608   2
   0 -10   8 186.822 222.815   3
   0  10  -8 58.8623 116.198   3
   0  10  -8-88.5734 111.353   2
   0  10  -7 779.729 216.733   2
   0 -10   7 1016.43 353.028   3
   0  10  -7 821.373 275.101   3
   0 -10   7 780.223 261.844   2
   0  10  -6 4116.87 624.799   3
   0 -10   6 4898.57 582.856   2
   0  10  -6 4635.72 539.688   2
   0 -10   6 4109.80 664.355   3
   0 -10   5 8408.33 963.208   3
   0  10  -5 8714.37 687.412   2
   0 -10   5 8766.47 1022.87   1
   0 -10   5 8432.04 721.974   2
   0  10  -5 7806.64 850.453   3
   0 -10   4 1828.72 307.451   2
   0 -10   4 1727.77 426.877   3
   0  10  -4 1926.02 399.381   3
   0 -10   4 1923.22 464.960   1
   0 -10   3 8868.54 1010.17   1
   0  10  -3 7178.85 814.592   3
   0 -10   3 9001.42 715.976   2
   0 -10   3 7445.52 906.119   3
   0 -10   2 149.178 61.9687   2
   0  10  -2 180.499 217.002   3
   0 -10   2 369.819 219.535   3
   0 -10   2 309.481 186.116   1
   0  10  -1 5373.49 739.421   3
   0 -10   1 7113.10 899.580   1
   0 -10   1 6719.39 652.445   2
   0 -10   1 5919.54 823.736   3
   0  10   0 855.400 319.467   3
   0 -10   0 939.357 322.340   1
   0 -10   0 865.802 341.074   3
   0 -10   0 590.557 181.414   2
   0 -10  -1 2655.60 551.044   1
   0 -10  -1 2620.30 586.451   3
   0  10   1 2429.37 499.312   1
   0 -10  -2 32638.8 2026.65   3
   0  10   2 28703.0 1735.61   1
   0  10   2 32697.4 2024.00   3
   0 -10  -2 28007.8 1873.36   1
   0  10   3 4768.15 798.689   1
   0  10   3 5415.66 886.702   3
   0 -10  -3 4393.96 751.319   1
   0 -10  -3 5438.54 821.314   3
   0 -10  -4 51985.3 2624.27   1
   0  10   4 43268.9 2277.35   1
   0  10   5 8402.20 1036.47   1
   0  10   6 2572.11 564.642   1
   0  10   7 4922.92 865.098   1
   0 -10  -7 5268.62 876.891   2
   0  10   8 57.6033 234.462   1
   0  10   9 13.3219 234.488   1
   0  10  10 6.77438 154.918   1
   0  10  11 28125.5 2332.28   1
   0  10  12 25598.1 2285.02   1
   0  10  13-127.001 198.451   1
   0  10  14 1033.19 516.757   1
   0  10  15 524.923 433.446   1
   0  11 -18 7219.55 1102.31   3
   0  11 -17 356.951 237.155   3
   0 -11  17 314.957 275.043   2
   0 -11  16 109.740 158.109   2
   0  11 -16 205.033 116.265   3
   0 -11  15 468.610 254.588   2
   0  11 -15 436.731 292.330   3
   0  11 -14 4310.80 754.708   3
   0 -11  14 4218.27 783.592   2
   0 -11  13 5930.65 890.525   2
   0  11 -13 7422.88 977.443   3
   0 -11  12 614.180 292.097   2
   0  11 -12 549.224 212.541   2
   0  11 -12 472.473 169.165   3
   0  11 -11 370.602 155.652   2
   0 -11  11 251.481 167.898   2
   0  11 -11 441.617 182.453   3
   0 -11  10 2170.24 488.040   2
   0 -11  10 1488.87 440.904   3
   0  11 -10 2481.57 460.431   2
   0  11 -10 2144.63 484.294   3
   0 -11   9-51.0479 114.009   3
   0  11  -9-144.275 223.468   3
   0 -11   9 69.9316 80.4152   2
   0  11  -9 209.141 70.6545   2
   0 -11   8 317.153 221.080   3
   0  11  -8 366.485 177.210   2
   0 -11   8 288.045 165.517   2
   0  11  -8 410.470 262.397   3
   0 -11   7 1317.07 404.351   3
   0 -11   7 1544.31 337.671   2
   0  11  -7 1539.99 414.760   3
   0  11  -7 1827.53 384.396   2
   0 -11   6 109.641 167.357   3
   0  11  -6 356.719 166.961   2
   0 -11   6 287.777 361.993   1
   0 -11   6 443.383 252.964   2
   0  11  -6 345.145 264.362   3
   0  11  -5 10135.0 1005.25   3
   0 -11   5 9501.86 1121.70   1
   0 -11   5 10879.5 846.706   2
   0 -11   5 9492.83 1084.12   3
   0 -11   4 814.727 202.363   2
   0 -11   4 1068.77 356.537   3
   0  11  -4 1156.42 344.412   3
   0 -11   4 1022.65 374.667   1
   0 -11   3 18879.6 1088.71   2
   0 -11   3 20862.6 1632.73   1
   0  11  -3 16163.5 1267.56   3
   0 -11   3 17006.0 1448.96   3
   0 -11   2 8155.70 1027.10   1
   0  11  -2 6714.98 853.171   3
   0 -11   2 6537.99 900.678   3
   0 -11   2 6330.72 637.889   2
   0  11  -1 15194.4 1302.63   3
   0 -11   1 18695.3 1153.25   2
   0 -11   1 16260.7 1451.03   3
   0 -11   0 67.5793 96.9137   3
   0  11   0 298.211 269.991   3
   0 -11   0 82.1612 238.226   1
   0 -11   0 52.9008 117.842   2
   0 -11  -1-312.072 231.045   1
   0 -11  -1 202.894 195.362   3
   0  11   1 288.614 240.916   3
   0  11   1 577.283 352.240   1
   0 -11  -2 12047.9 1262.29   1
   0  11   2 11134.2 1216.88   3
   0  11   2 9206.02 1031.19   1
   0  11   3 978.720 364.683   1
   0  11   3 644.933 334.306   3
   0  11   4 5726.07 873.916   1
   0  11   5 882.022 426.418   1
   0  11   6 5858.80 910.170   1
   0  11   7 298.425 136.050   1
   0  11   8 9183.28 1257.43   1
   0  11   9 156.907 149.754   1
   0  11  10-173.798 317.827   1
   0  11  11 1397.10 725.547   1
   0  11  12 3289.84 902.045   1
   0  11  13 685.046 411.603   1
   0  11  14 5051.34 1109.14   1
   0  12 -17 1701.54 512.780   3
   0 -12  17 1489.50 522.685   2
   0  12 -16 1390.58 466.137   3
   0 -12  16 1468.11 550.174   2
   0 -12  15 172.640 192.417   2
   0  12 -15 122.702 155.638   3
   0 -12  14 1156.70 433.525   2
   0  12 -14 1152.97 426.383   3
   0  12 -13 2596.19 609.392   3
   0 -12  13 2760.24 620.549   2
   0  12 -12 2048.08 458.642   2
   0 -12  12 1723.82 461.815   2
   0  12 -12 2237.24 527.603   3
   0  12 -11 132.995 189.411   3
   0 -12  11 192.772 148.376   2
   0  12 -11-84.9333 234.009   2
   0 -12  10 1649.68 413.986   2
   0  12 -10 2045.84 527.335   3
   0  12 -10 2454.27 473.305   2
   0 -12   9 4843.92 685.414   2
   0  12  -9 6267.90 881.693   3
   0  12  -9 4928.89 649.470   2
   0 -12   8 21451.6 1702.16   3
   0  12  -8 30202.7 1522.17   2
   0  12  -8 28687.3 1845.69   3
   0 -12   8 24519.0 1492.38   2
   0 -12   7 348.419 409.478   3
   0  12  -7 414.866 217.731   2
   0 -12   7-27.1564 106.253   2
   0  12  -7 313.427 297.813   3
   0  12  -6 29733.2 1822.24   3
   0 -12   6 28623.1 1952.93   3
   0 -12   6 32290.6 1563.53   2
   0  12  -5 5977.18 821.616   3
   0 -12   5 6251.57 666.739   2
   0 -12   5 5104.66 829.714   3
   0 -12   5 5140.00 881.193   1
   0 -12   4 1767.07 491.116   1
   0 -12   4 2644.00 589.233   3
   0 -12   4 2268.49 388.331   2
   0  12  -4 2808.40 545.060   3
   0 -12   3 1130.56 414.422   1
   0 -12   3 1523.71 734.183   3
   0 -12   3 964.086 267.605   2
   0 -12   2 43771.5 1743.27   2
   0  12  -2 39145.4 2143.40   3
   0 -12   1 27599.2 1448.13   2
   0  12  -1 22740.1 1668.72   3
   0 -12   1 26001.0 2004.58   1
   0 -12   0 3203.43 679.822   1
   0 -12   0 3176.66 520.418   2
   0  12   1 30412.5 1939.27   1
   0 -12  -1 33938.0 1762.16   2
   0  12   1 31152.7 2069.63   3
   0  12   2 10755.7 1225.01   3
   0  12   2 9077.63 1087.17   1
   0  12   3 1229.78 424.515   1
   0  12   3 622.530 225.260   3
   0  12   4 316.562 188.258   1
   0  12   5 357.382 373.352   1
   0  12   6 6782.85 1035.83   1
   0  12   7 4845.47 888.362   1
   0  12   8 1154.06 451.735   1
   0  12   9 2563.26 677.481   1
   0  12  10 1927.13 626.983   1
   0  12  11 1234.52 571.469   1
   0  12  12 517.961 428.720   1
   0  12  13 319.710 301.527   1
   0  13 -17 41.1742 175.695   3
   0 -13  17 248.107 271.398   2
   0 -13  16 1159.03 457.760   2
   0  13 -16 1020.66 402.027   3
   0 -13  15 817.920 369.549   2
   0  13 -15 836.043 345.674   3
   0 -13  14-121.970 198.324   2
   0  13 -14-80.2971 149.849   3
   0  13 -13 3599.17 735.005   3
   0 -13  13 4217.69 753.557   2
   0 -13  12 804.334 272.678   2
   0  13 -12 1368.13 470.122   3
   0  13 -11 67.8715 140.447   2
   0 -13  11 61.9665 175.258   2
   0  13 -11 59.0454 170.769   3
   0  13 -10 7930.56 1039.15   3
   0  13 -10 8343.48 881.548   2
   0 -13  10 5751.16 747.275   2
   0  13  -9 3074.61 634.529   3
   0  13  -9 3323.00 521.984   2
   0 -13   9 2397.02 474.163   2
   0  13  -8 809.381 330.584   3
   0 -13   8 1046.28 331.997   2
   0  13  -8 1252.80 311.896   2
   0 -13   7 4790.07 647.094   2
   0  13  -7 5365.53 830.082   3
   0 -13   6 13011.4 1036.06   2
   0  13  -6 15709.4 1400.99   3
   0 -13   5 17817.0 1166.62   2
   0  13  -5 20074.7 1565.73   3
   0  13  -4 2075.44 481.343   3
   0 -13   4 1433.41 306.778   2
   0  13  -3 3523.94 989.620   3
   0 -13   3 75.8975 172.514   2
   0  13  -2 16244.5 1464.64   3
   0 -13   2 13835.7 1022.57   2
   0  13  -1 5323.42 873.190   3
   0 -13   1 4435.22 596.470   2
   0  13   0 847.175 405.855   3
   0 -13   0-16.2447 149.147   2
   0 -13  -1 4502.46 670.658   2
   0  13   1 5567.09 942.109   3
   0  13   2 6972.12 1118.10   3
   0  13   2 6973.09 1077.47   1
   0  13   3 24178.8 1870.97   1
   0  13   3 26507.7 2047.25   3
   0  13   4 819.245 376.281   1
   0  13   5 528.153 291.110   1
   0  13   6 5611.39 972.507   1
   0  13   7 2452.11 657.443   1
   0  13   8 4788.13 929.927   1
   0  13   9 844.040 307.722   1
   0  13  10 157.095 213.727   1
   0  13  11 4694.22 1031.87   1
   0  13  12 2155.23 724.753   1
   0 -14  16 978.450 440.260   2
   0  14 -16 928.264 411.026   3
   0  14 -15 776.458 361.934   3
   0 -14  15 573.078 289.135   2
   0 -14  14-92.4303 191.433   2
   0  14 -14 83.9096 169.731   3
   0 -14  13 466.275 282.992   2
   0  14 -13 180.330 175.758   3
   0  14 -12 2056.16 549.765   3
   0 -14  12 1467.10 426.902   2
   0  14 -11 2941.84 647.328   3
   0 -14  11 1949.11 489.640   2
   0  14 -10 1927.65 563.577   3
   0 -14  10 1184.93 346.856   2
   0  14  -9 5458.77 843.460   3
   0 -14   9 4153.24 634.436   2
   0  14  -9 5823.50 692.070   2
   0  14  -8 276.579 216.891   3
   0 -14   8 108.652 155.679   2
   0  14  -7 133.805 146.740   3
   0 -14   7-55.5830 117.764   2
   0  14  -6-3.79426 255.370   3
   0 -14   6 31.1209 112.851   2
   0 -14   5 1822.19 361.934   2
   0  14  -5 2214.34 538.908   3
   0  14  -4 243.622 113.413   3
   0 -14   4 449.052 139.529   2
   0  14  -3 13386.3 1419.76   3
   0 -14   3 2653.20 718.001   2
   0 -14   2 31582.8 1601.48   2
   0  14  -2 42794.3 2480.16   3
   0  14  -1 27723.2 1975.51   3
   0 -14   1 26388.9 1537.01   2
   0  14   0 888.396 392.582   3
   0 -14   0 679.753 249.853   2
   0  14   1 1972.31 639.816   3
   0 -14  -1 1911.66 436.376   2
   0  14   2 1912.84 586.137   1
   0 -14  -2 1338.80 393.408   2
   0  14   2 1839.59 665.848   3
   0  14   3 3286.85 745.383   3
   0  14   3 3876.28 791.964   1
   0  14   4-4.73854 219.212   1
   0  14   5 643.897 396.639   1
   0  14   6 18768.3 1830.20   1
   0  14   7 781.988 380.178   1
   0  14   8 328.031 275.488   1
   0  14   9 811.387 279.841   1
   0  14  10-109.580 213.736   1
   0  14  11 1115.93 556.643   1
   0  15 -15 826.169 380.790   3
   0  15 -14 3253.81 720.253   3
   0  15 -13 188.181 117.590   3
   0 -15  13 76.4754 121.337   2
   0  15 -12 330.151 287.833   3
   0 -15  12 554.922 301.906   2
   0  15 -11 329.065 210.474   3
   0 -15  11 174.639 205.827   2
   0 -15  10 405.137 216.482   2
   0  15 -10 423.855 322.027   3
   0 -15   9 911.584 292.709   2
   0  15  -9 1121.18 410.178   3
   0 -15   8 457.898 263.757   2
   0  15  -8 934.628 531.031   3
   0 -15   7 25307.5 1552.16   2
   0  15  -7 26425.4 1953.35   3
   0 -15   6 2503.14 536.487   2
   0  15  -6 3578.30 748.854   3
   0  15  -5 6699.26 982.931   3
   0 -15   5 6341.44 736.323   2
   0 -15   4 1053.35 286.095   2
   0  15  -4 1161.26 415.169   3
   0 -15   3 399.621 182.451   2
   0  15  -3 963.336 361.436   3
   0 -15   2 393.375 223.440   2
   0  15  -2 33.0511 166.165   3
   0 -15   1 3790.01 633.657   2
   0  15  -1 4649.82 1065.27   3
   0 -15   0 12880.2 1160.97   2
   0  15   0 15447.3 1637.90   3
   0 -15  -1 4036.59 679.963   2
   0  15   1 5082.26 1006.31   3
   0  15   2 5157.55 1006.61   3
   0 -15  -2 3509.61 652.837   2
   0  15   3 8082.90 1158.22   1
   0 -15  -3 7755.14 1014.98   2
   0  15   4-188.975 222.628   1
   0  15   5 820.408 504.352   1
   0  15   6 2800.62 723.831   1
   0  15   7 2687.10 756.097   1
   0  15   8 1101.61 458.897   1
   0  15   9 1948.86 702.109   1
   0  15  10 493.199 328.473   1
   0  16 -15-311.818 329.687   3
   0  16 -14 251.438 280.535   3
   0  16 -13-114.176 197.918   3
   0  16 -12 1889.07 551.009   3
   0  16 -11 1115.90 387.334   3
   0  16 -10 379.902 300.304   3
   0  16  -9 993.041 370.614   3
   0 -16   8 2628.11 508.983   2
   0  16  -8 2363.89 579.489   3
   0 -16   7 9680.49 978.456   2
   0  16  -7 8700.38 1152.15   3
   0  16  -6 977.664 368.979   3
   0 -16   6 870.511 264.375   2
   0  16  -5 3777.85 830.701   3
   0 -16   5 2696.94 519.245   2
   0  16  -4 9975.38 1357.57   3
   0 -16   4 10254.0 953.167   2
   0  16  -3 9296.21 1232.06   3
   0 -16   3 10510.7 950.080   2
   0 -16   2 1555.82 414.748   2
   0  16  -2 1239.03 522.355   3
   0 -16   1 5361.35 729.834   2
   0  16  -1 5436.49 1019.68   3
   0 -16   0 4235.33 680.023   2
   0  16   0 6333.27 1104.01   3
   0 -16  -1 462.974 261.230   2
   0  16   1-90.7618 224.512   3
   0  16   2 1741.10 702.778   3
   0 -16  -2 548.262 336.893   2
   0 -16  -3 7997.41 1060.45   2
   0  16   4 2428.60 730.419   1
   0  16   5 1579.40 551.660   1
   0  16   6 339.526 276.886   1
   0  16   7-159.001 169.120   1
   0  16   8-25.4306 217.773   1
   0  16   9 522.729 368.463   1
   0  17 -14 244.592 198.816   3
   0  17 -13 1020.70 392.052   3
   0  17 -12 1259.77 487.011   3
   0  17 -11 207.956 205.788   3
   0  17 -10 3437.17 761.746   3
   0  17  -9 59.3068 103.947   3
   0  17  -8 224.660 286.952   3
   0  17  -7 3067.06 721.433   3
   0  17  -6 979.379 406.077   3
   0  17  -5 3545.26 855.764   3
   0  17  -4 4206.68 860.490   3
   0  17  -3 1351.88 497.474   3
   0  17  -2 124.750 160.844   3
   0  17  -1 502.628 339.538   3
   0  17   0 633.219 352.020   3
   0  17   1 842.779 506.976   3
   0  17   4 3151.81 799.138   1
   0  17   5 916.657 500.300   1
   0  17   6-245.294 163.679   1
   0  17   7 1177.94 550.407   1
   0  18 -13 673.953 355.817   3
   0  18 -12 253.667 148.539   3
   0  18 -11 498.329 258.426   3
   0  18 -10 1979.25 581.093   3
   0  18  -9 112.034 148.055   3
   0  18  -8 1611.78 530.810   3
   0  18  -7 1232.26 460.307   3
   0  18  -6 1802.88 600.714   3
   0  18  -5 1091.48 472.607   3
   0  18  -4 106.172 127.417   3
   0  18  -3 59.5326 268.320   3
   0  18  -2 249.563 273.465   3
   0  18  -1 202.077 284.150   3
   0  18   0 1510.94 665.660   3
   0  18   1 3536.48 894.824   3
   0  18   5 1265.59 582.758   1
   0  18   6-104.706 319.967   1
   0  19 -12 124.795 224.659   3
   0  19 -11 1897.31 599.090   3
   0  19 -10 1481.20 574.423   3
   0  19  -9 199.129 161.457   3
   0  19  -8-185.853 237.524   3
   0  19  -7-27.5648 123.777   3
   0  19  -6 2788.85 752.088   3
   0  19  -5-115.250 254.964   3
   0  19  -4 258.761 264.421   3
   0  19  -3 139.188 284.467   3
   0  19  -2-53.0656 138.860   3
   0  19  -1 246.499 328.081   3
   0  19   0 455.273 378.078   3
   0  20 -10-483.666 358.487   3
   0  20  -9 697.432 448.251   3
   0  20  -8 216.527 258.997   3
   0  20  -7-43.4773 123.715   3
   0  20  -6 1406.15 521.041   3
   0  20  -5 549.098 339.718   3
   0  20  -4-266.086 177.007   3
   0  20  -3 1735.91 661.996   3
  -1  20  -2 273.559 267.239   3
  -1  20  -3-95.2224 249.822   3
  -1  20  -4 280.001 175.704   3
  -1  20  -5 780.450 426.316   3
  -1  20  -6 1227.13 552.397   3
  -1  20  -7 157.833 161.570   3
  -1  20  -8 265.267 269.955   3
  -1  20  -9 184.636 291.900   3
  -1  20 -10 595.623 502.315   3
  -1  20 -11 1029.37 481.907   3
  -1  19   6 111.541 173.883   1
  -1  19   2 773.266 493.773   3
  -1  19   1-349.303 284.104   3
  -1  19   0 751.948 504.234   3
  -1  19  -1 325.016 278.841   3
  -1  19  -2 118.573 252.502   3
  -1  19  -3 129.369 265.461   3
  -1  19  -4 1340.40 487.470   3
  -1  19  -5 396.060 235.276   3
  -1  19  -6 1367.09 534.421   3
  -1  19  -7 1936.60 627.396   3
  -1  19  -8-216.867 146.184   3
  -1  19  -9-240.422 268.533   3
  -1  19 -10 483.297 345.329   3
  -1  19 -11 81.5641 148.119   3
  -1  19 -12 330.217 316.248   3
  -1  18   8-31.8401 207.162   1
  -1  18   7 615.027 342.094   1
  -1  18   6 953.671 473.097   1
  -1  18   5 290.701 193.109   1
  -1  18   3 2236.98 690.616   3
  -1  18   2 683.315 531.298   3
  -1  18   1 129.044 178.234   3
  -1  18   0 4636.11 947.417   3
  -1  18  -1 3097.77 803.063   3
  -1  18  -2 731.556 440.601   3
  -1  18  -3 298.743 256.949   3
  -1  18  -4 485.671 401.644   3
  -1  18  -5-93.7773 319.381   3
  -1  18  -6-96.1226 109.118   3
  -1  18  -7 620.616 279.728   3
  -1  18  -8 1487.87 527.816   3
  -1  18  -9 53.3237 186.532   3
  -1  18 -10 849.219 355.100   3
  -1  18 -11 1693.96 552.679   3
  -1  18 -12 166.029 221.740   3
  -1  18 -13 65.1186 281.964   3
  -1  18 -14 562.636 339.969   3
  -1  17   9 412.942 358.622   1
  -1  17   8 118.185 127.904   1
  -1  17   7 416.833 272.779   1
  -1  17   6 1814.90 600.214   1
  -1  17   5 4635.80 991.641   1
  -1  17   4 1086.34 574.832   3
  -1  17   4 182.382 296.140   1
  -1  17   3 619.011 297.390   3
  -1  17   2 4436.96 983.637   3
  -1  17   1 2432.67 803.173   3
  -1  17   0 748.364 451.109   3
  -1  17  -1 263.667 259.057   3
  -1  17  -2 520.662 358.894   3
  -1  17  -3-170.775 280.464   3
  -1  17  -4 1206.98 505.428   3
  -1  17  -5 5081.35 922.758   3
  -1  17  -6 2886.35 735.329   3
  -1  17  -7 2622.97 692.498   3
  -1  17  -8 52.9038 139.976   3
  -1  17  -9 187.260 179.501   3
  -1  17 -10 408.154 217.190   3
  -1  17 -11 89.6044 169.723   3
  -1  17 -12 687.823 354.754   3
  -1  17 -13 2759.75 723.294   3
  -1  17 -14 653.325 385.601   3
  -1  17 -15 242.229 133.671   3
  -1  16  10 544.974 305.724   1
  -1  16   9 650.130 380.796   1
  -1  16   8-208.115 263.907   1
  -1  16   7 1755.81 578.995   1
  -1  16   6 118.730 273.169   1
  -1  16   5 2619.17 675.094   1
  -1  16   4 1557.77 514.035   1
  -1  16   4 1015.99 409.153   3
  -1  16   3 837.609 415.183   1
  -1  16   3 248.049 334.808   3
   1 -16  -3 179.598 85.2752   2
   1 -16  -2 9923.97 998.042   2
  -1  16   2 8229.03 1238.03   3
   1 -16  -1 829.531 280.648   2
  -1  16   1 3197.25 779.781   3
  -1  16   0 2587.07 637.320   3
   1 -16   0 3442.86 498.958   2
   1 -16   1 6852.84 660.979   2
  -1  16  -1 5911.87 1000.08   3
  -1  16  -2 2670.11 713.750   3
   1 -16   2 2880.20 418.691   2
   1 -16   3 2581.05 366.208   2
  -1  16  -3 2076.64 561.939   3
  -1  16  -4 1490.45 464.237   3
  -1  16  -5 2026.53 568.521   3
  -1  16  -6 2513.66 660.829   3
  -1  16  -7 8192.40 1135.74   3
  -1  16  -8 11378.8 1347.92   3
  -1  16  -9 1069.55 457.753   3
  -1  16 -10 2204.82 640.602   3
  -1  16 -11-0.74211 103.504   3
  -1  16 -12 415.868 357.411   3
  -1  16 -13 414.456 346.508   3
  -1  16 -14 2208.25 661.805   3
  -1  16 -15 4555.21 976.727   3
  -1  16 -16 87.5294 151.780   3
  -1  15  11 156.713 310.114   1
  -1  15  10 299.578 468.918   1
  -1  15   9 2928.67 781.229   1
  -1  15   8 1505.48 547.423   1
  -1  15   7 1652.60 578.665   1
  -1  15   6-35.2693 266.577   1
  -1  15   5 2412.01 646.202   1
  -1  15   4 365.964 245.798   3
  -1  15   4 743.323 412.670   1
  -1  15   3 1701.78 550.272   1
  -1  15   3 2129.80 605.977   3
   1 -15  -2 1020.04 322.251   2
   1 -15  -2 1517.27 424.255   2
  -1  15   2 1775.87 650.470   3
   1 -15  -1 1023.43 292.182   2
  -1  15   1 905.956 378.709   3
   1 -15   0 9551.45 822.663   2
  -1  15   0 6682.90 1038.40   3
   1 -15   1 6598.05 632.938   2
  -1  15  -1 6750.68 1057.46   3
   1 -15   2 1632.39 340.475   2
  -1  15  -2 1827.25 578.571   3
   1 -15   3 2665.61 378.954   2
  -1  15  -3 1697.68 457.627   3
   1 -15   4 888.255 278.483   2
  -1  15  -4 1355.72 513.113   3
  -1  15  -5 157.457 237.568   3
   1 -15   5 66.7204 76.0479   2
  -1  15  -6 1483.17 468.692   3
   1 -15   6 1671.79 306.524   2
   1 -15   7 3010.82 433.735   2
  -1  15  -7 2724.71 648.153   3
  -1  15  -8 1295.24 465.689   3
   1 -15   8 1311.58 281.609   2
   1 -15   9 755.031 241.139   2
  -1  15  -9 937.514 431.294   3
   1 -15  10 3555.22 572.480   2
  -1  15 -10 3397.40 782.510   3
  -1  15 -11 1559.37 521.012   3
  -1  15 -12-49.1962 186.242   3
  -1  15 -13 978.853 411.355   3
  -1  15 -14-219.486 213.971   3
  -1  15 -15 406.002 291.915   3
  -1  15 -16 1208.04 516.658   3
  -1  15 -17 4311.36 902.721   3
  -1  14  12 1498.71 609.198   1
  -1  14  11 989.296 494.883   1
  -1  14  10 390.299 273.219   1
  -1  14   9 54.8526 144.195   1
  -1  14   8 161.066 243.325   1
  -1  14   7 924.828 399.978   1
  -1  14   6 4750.47 878.902   1
  -1  14   5 2361.40 627.919   1
  -1  14   5 3041.82 748.964   3
   1 -14  -5 3769.62 706.356   2
  -1  14   4 4375.87 908.282   3
  -1  14   4 3931.90 806.403   1
  -1  14   3 13752.1 1565.02   3
  -1  14   3 12993.0 1334.69   1
  -1  14   2 25504.7 1863.42   1
  -1  14   2 25933.8 2020.86   3
   1 -14  -2 21011.8 1359.31   2
   1 -14  -1 6277.13 704.326   2
  -1  14   1 11344.3 1441.99   3
   1 -14   0 958.853 297.141   2
  -1  14   0 1602.83 675.722   3
   1 -14   1 7541.71 634.608   2
  -1  14  -1 9509.96 1166.07   3
   1 -14   2 235.746 246.072   2
  -1  14  -2 4658.65 805.042   3
  -1  14  -3 7464.77 1011.76   3
   1 -14   3 5924.61 534.578   2
  -1  14  -4 6494.64 950.128   3
   1 -14   4 2450.22 374.375   2
  -1  14  -5 16256.2 1485.99   3
   1 -14   5 18165.2 980.409   2
   1 -14   6 6825.35 598.676   2
  -1  14  -6 7309.43 1043.40   3
  -1  14  -7 4924.40 833.967   3
   1 -14   7 5676.61 608.922   2
  -1  14  -8 115.129 216.414   3
   1 -14   8 269.107 109.012   2
  -1  14  -9 335.774 154.412   3
   1 -14   9 89.9465 79.9686   2
   1 -14  10-217.376 203.823   2
  -1  14 -10-57.9325 257.108   3
  -1  14 -11 1038.52 360.266   3
   1 -14  11 852.814 275.762   2
  -1  14 -12 5777.23 971.252   3
   1 -14  12 4391.42 695.235   2
   1 -14  13 104.290 138.254   2
  -1  14 -13-42.3844 120.439   3
  -1  14 -14 4362.30 880.919   3
  -1  14 -15 355.433 279.365   3
  -1  14 -16 249.395 126.187   3
  -1  14 -17 500.869 433.026   3
  -1  13  13 412.985 380.425   1
  -1  13  12 2265.48 775.065   1
  -1  13  11 381.088 334.392   1
  -1  13  10 1621.80 555.116   1
  -1  13   9 607.892 356.315   1
  -1  13   8 447.688 288.503   1
   1 -13  -7 5494.41 906.558   2
  -1  13   7 4033.13 831.270   1
  -1  13   6 569.815 279.276   1
   1 -13  -6 354.381 264.805   2
  -1  13   5 1397.48 477.459   3
  -1  13   5 1293.91 437.753   1
   1 -13  -5 1260.71 387.856   2
  -1  13   4 1581.49 411.220   1
  -1  13   4 2129.44 630.357   3
  -1  13   3 1720.17 522.744   1
  -1  13   3 2962.88 680.414   3
  -1  13   2 344.439 299.437   3
  -1  13   2 180.045 300.207   1
   1 -13  -1 9984.20 1200.85   1
  -1  13   1 8015.73 1075.56   3
   1 -13  -1 7660.62 721.834   2
   1 -13   0 9271.23 765.109   2
  -1  13   0 11244.1 1330.95   3
   1 -13   0 9054.18 1154.91   1
   1 -13   1 4623.81 953.776   1
   1 -13   1 3499.44 437.251   2
  -1  13  -2 875.474 505.262   3
   1 -13   2 909.211 496.216   1
   1 -13   2 716.401 198.041   2
   1 -13   3 476.706 137.973   2
  -1  13  -3 889.408 377.838   3
   1 -13   3 677.045 304.868   1
   1 -13   4 3997.77 432.615   2
  -1  13  -4 4004.43 689.954   3
   1 -13   4 4948.13 829.408   1
   1 -13   5 10455.3 734.665   2
  -1  13  -5 13497.0 1318.49   3
   1 -13   5 11805.8 1269.17   1
  -1  13  -6 8221.84 1068.50   3
   1 -13   6 10281.8 1206.45   1
   1 -13   7 316.967 145.148   2
  -1  13  -7 437.851 312.660   3
   1 -13   7 687.407 347.935   1
  -1  13  -8 4071.23 769.845   3
  -1  13  -8 4503.52 518.812   2
   1 -13   8 3261.65 478.796   2
  -1  13  -9 13640.2 971.788   2
  -1  13  -9 14667.9 1449.23   3
  -1  13 -10 447.836 337.819   3
  -1  13 -10 455.265 227.298   2
   1 -13  10 273.777 186.315   2
   1 -13  11 42.1905 150.605   2
  -1  13 -11-125.192 333.255   3
  -1  13 -11 176.480 157.457   2
  -1  13 -12 5637.42 946.450   3
   1 -13  12 4059.21 664.736   2
   1 -13  13 2416.50 572.716   2
  -1  13 -13 3864.95 778.195   3
  -1  13 -14 4957.47 924.851   3
  -1  13 -15 302.521 318.070   3
  -1  13 -16 1325.70 447.287   3
  -1  13 -17 2001.29 640.409   3
  -1  13 -18 844.385 420.881   3
  -1  12  14 444.884 420.120   1
  -1  12  13 1935.71 783.245   1
  -1  12  12 225.778 488.853   1
  -1  12  11-60.0426 340.569   1
  -1  12  10 263.816 229.318   1
  -1  12   9 733.665 417.790   1
  -1  12   8 124.063 176.750   1
  -1  12   7 279.456 206.200   1
   1 -12  -7 1085.33 400.155   2
   1 -12  -6 25200.9 1829.28   2
  -1  12   6 28844.3 2009.72   1
  -1  12   5 7066.19 1077.09   3
  -1  12   5 7014.49 981.102   1
  -1  12   4 712.626 354.886   3
  -1  12   4 189.821 224.116   1
   1 -12  -3-156.833 195.103   1
  -1  12   3 226.621 220.972   3
   1 -12  -3 183.403 157.333   2
  -1  12   3 428.484 255.187   1
   1 -12  -2 6072.26 878.508   1
  -1  12   2 8027.10 942.129   1
  -1  12   2 7371.37 996.303   3
   1 -12  -1 2084.97 373.236   2
  -1  12   1 2670.20 668.953   3
   1 -12  -1 2107.81 475.299   1
  -1  12   1 3182.33 723.182   1
  -1  12   0 2694.35 596.143   3
   1 -12   0 1934.20 495.349   1
   1 -12   0 3182.76 412.737   2
   1 -12   1 24863.8 1836.39   1
  -1  12  -1 25679.7 1722.48   3
   1 -12   1 28801.3 1142.76   2
   1 -12   2 30647.6 2003.62   1
  -1  12  -2 29979.6 1867.55   3
   1 -12   2 32820.6 1148.36   2
   1 -12   3 10404.1 652.966   2
   1 -12   3 10927.8 1164.45   1
   1 -12   4 11012.6 700.187   2
   1 -12   4 11531.2 1311.12   1
  -1  12  -5 896.138 495.941   3
   1 -12   5 423.183 160.181   2
   1 -12   6 12544.5 1267.53   1
  -1  12  -6 13986.4 1312.34   3
   1 -12   6 10614.3 719.695   2
  -1  12  -7 17700.3 979.307   2
  -1  12  -7 18605.7 1557.84   3
   1 -12   7 14434.5 952.788   2
  -1  12  -8 15.3821 298.259   3
   1 -12   8 97.8280 136.134   2
  -1  12  -8 218.179 144.028   2
  -1  12  -9 34891.3 2149.27   3
  -1  12  -9 35369.5 1575.34   2
  -1  12 -10 8321.08 1093.46   3
  -1  12 -10 7379.51 755.355   2
   1 -12  10 6297.67 778.985   2
   1 -12  11 386.771 199.886   2
  -1  12 -11 1082.22 443.178   3
  -1  12 -11 707.593 234.725   2
   1 -12  12-156.050 164.500   2
  -1  12 -12-148.578 145.512   2
  -1  12 -12-54.2264 239.307   3
   1 -12  13 108.009 215.383   2
  -1  12 -13 369.721 278.015   3
  -1  12 -14-51.7901 137.947   3
  -1  12 -15 28.6951 184.000   3
  -1  12 -16 562.711 320.645   3
  -1  12 -17 311.411 234.312   3
  -1  12 -18 2674.68 732.187   3
  -1  11  15 354.304 268.656   1
  -1  11  14 10528.8 1542.33   1
  -1  11  13 5415.39 1137.79   1
  -1  11  12-338.767 337.877   1
  -1  11  11 3980.23 864.989   1
  -1  11  10 239.268 378.087   1
  -1  11   9 3048.34 704.840   1
  -1  11   8 190.343 244.758   1
   1 -11  -8 23.4715 208.251   2
   1 -11  -7 5125.81 869.514   2
  -1  11   7 4786.09 832.372   1
  -1  11   6 6425.18 937.914   1
   1 -11  -6 6107.77 866.065   2
  -1  11   5 619.792 330.147   1
  -1  11   5 84.3610 133.093   3
   1 -11  -5-34.3886 276.805   1
  -1  11   4 18123.5 1603.94   3
   1 -11  -4 14351.7 1373.10   1
  -1  11   4 16462.2 1398.83   1
  -1  11   3 5851.30 826.842   1
   1 -11  -3 4112.27 696.421   1
  -1  11   3 5912.53 904.318   3
  -1  11   2 1958.53 484.446   1
  -1  11   2 1846.41 545.682   3
   1 -11  -2 1818.48 472.048   1
   1 -11  -1 6673.31 894.656   1
   1 -11  -1 9537.26 1124.75   3
  -1  11   1 7785.73 938.883   3
  -1  11   1 8465.17 903.485   1
  -1  11   0 357.674 501.042   3
   1 -11   0 306.984 230.266   3
   1 -11   0 116.719 100.589   2
   1 -11   1 481.929 162.631   2
   1 -11   1 564.016 228.172   3
  -1  11  -1 486.270 295.322   3
  -1  11  -2 41027.0 2058.93   3
   1 -11   2 44045.5 2379.38   3
   1 -11   2 46240.2 1282.97   2
   1 -11   3 4704.15 800.080   3
  -1  11  -3 4391.71 882.158   3
   1 -11   3 4463.68 405.888   2
   1 -11   4 44609.8 2362.01   3
   1 -11   4 50356.7 1445.63   2
  -1  11  -4 44381.6 2212.91   3
   1 -11   5 6696.91 551.673   2
   1 -11   5 5516.37 873.659   3
   1 -11   5 6127.47 957.768   1
  -1  11  -5 6576.80 965.202   3
   1 -11   6 2421.93 558.376   3
   1 -11   6 1879.08 308.361   2
  -1  11  -6 2177.57 503.128   3
  -1  11  -6 2575.89 354.642   2
   1 -11   7 6627.03 935.295   3
  -1  11  -7 9196.19 701.701   2
  -1  11  -7 9228.85 1023.65   3
   1 -11   7 9538.52 771.105   2
  -1  11  -8 1122.81 348.954   3
   1 -11   8 962.277 341.753   3
   1 -11   8 1090.81 297.049   2
  -1  11  -8 809.736 229.763   2
  -1  11  -9 2910.37 447.658   2
   1 -11   9 2162.51 438.239   2
  -1  11  -9 3246.41 627.232   3
  -1  11 -10 3243.80 486.381   2
   1 -11  10 2360.91 479.746   2
  -1  11 -10 3619.62 664.413   3
  -1  11 -11 1864.67 491.662   3
   1 -11  11 1068.36 344.552   2
  -1  11 -11 1649.59 382.257   2
  -1  11 -12 143.528 145.247   3
   1 -11  12 73.9764 88.6840   2
  -1  11 -12 28.7314 114.914   2
  -1  11 -13 12638.0 1377.44   3
   1 -11  13 9027.33 1049.96   2
  -1  11 -14 273.908 192.958   3
  -1  11 -15 3777.26 784.175   3
  -1  11 -16 551.043 305.835   3
  -1  11 -17 97.4514 178.384   3
  -1  11 -18-24.6109 241.211   3
  -1  11 -19-186.996 347.095   3
  -1  10  16 1805.83 678.243   1
  -1  10  15-17.4006 196.886   1
  -1  10  14 2170.83 743.869   1
  -1  10  13 1992.85 619.553   1
  -1  10  12 1401.22 577.755   1
  -1  10  11 8953.27 1254.09   1
  -1  10  10 3368.73 732.148   1
  -1  10   9 2673.72 673.204   1
   1 -10  -8 244.311 239.921   2
  -1  10   8 732.552 297.155   1
  -1  10   7-33.9569 183.329   1
   1 -10  -7 120.350 134.790   2
   1 -10  -6 1121.68 388.092   1
  -1  10   6 455.020 296.626   1
   1 -10  -5 650.204 285.151   1
  -1  10   5 197.244 120.219   1
  -1  10   5 573.282 328.738   3
  -1  10   4 10366.9 1051.84   1
   1 -10  -4 11512.9 1225.20   3
   1 -10  -4 11836.4 999.696   2
  -1  10   4 12239.0 1246.75   3
   1 -10  -4 12624.1 1215.90   1
   1 -10  -3 6529.18 913.228   3
  -1  10   3 4855.40 774.540   3
   1 -10  -3 4119.36 661.608   1
  -1  10   3 5152.65 744.928   1
  -1  10   2 154.034 139.890   1
   1 -10  -2 248.843 127.156   3
   1 -10  -1 17059.4 1432.93   3
  -1  10   1 14646.9 1145.30   1
   1 -10   0 2044.50 287.279   2
   1 -10   0 2222.08 483.445   3
   1 -10   1 25033.5 942.090   2
   1 -10   1 22915.4 1635.76   3
   1 -10   2-37.0775 87.3332   2
   1 -10   2 191.674 81.8150   3
  -1  10  -3 17487.6 1314.26   3
   1 -10   3 18919.7 1453.52   3
   1 -10   3 18554.7 785.975   2
   1 -10   4 7415.73 916.515   3
   1 -10   4 9250.43 602.763   2
  -1  10  -4 9041.81 975.036   3
  -1  10  -5 2219.24 297.426   2
   1 -10   5 2021.33 478.301   3
  -1  10  -5 1842.94 432.813   3
   1 -10   5 2033.56 285.758   2
   1 -10   6 21161.1 1548.91   3
  -1  10  -6 23636.9 1559.79   3
  -1  10  -6 24741.2 1052.73   2
   1 -10   6 23793.9 1102.97   2
   1 -10   7 500.116 175.397   2
  -1  10  -7 347.701 140.397   2
  -1  10  -7 462.586 302.553   3
   1 -10   7 157.219 169.404   3
   1 -10   8 7895.17 962.490   3
  -1  10  -8 10281.1 795.713   2
   1 -10   8 10722.3 891.930   2
  -1  10  -8 10117.8 1080.89   3
  -1  10  -9 3518.58 671.784   3
  -1  10  -9 3368.34 486.949   2
   1 -10   9 2239.25 525.516   3
   1 -10   9 3560.98 546.756   2
  -1  10 -10 7346.98 942.552   3
  -1  10 -10 6162.39 699.393   2
   1 -10  10 6907.50 814.505   2
  -1  10 -11 164.597 184.985   2
  -1  10 -11-75.8157 283.779   3
   1 -10  11 154.244 162.604   2
  -1  10 -12 1205.54 366.264   3
  -1  10 -12 1155.64 362.683   2
   1 -10  12 966.480 360.889   2
  -1  10 -13 150.572 301.380   3
   1 -10  13 142.622 234.565   2
  -1  10 -14 872.629 358.789   3
  -1  10 -15 2248.78 596.912   3
  -1  10 -16 23.8120 178.010   3
  -1  10 -17 729.086 356.708   3
  -1  10 -18 4244.22 877.508   3
   1 -10  19-28.7645 217.420   1
  -1  10 -19-619.074 515.019   3
  -1   9  16 2367.57 741.299   1
  -1   9  15 1361.88 600.596   1
  -1   9  14-122.338 290.246   1
  -1   9  13-499.983 209.206   1
  -1   9  12 5614.39 993.601   1
  -1   9  11 1110.49 491.629   1
  -1   9  10 403.848 367.238   1
  -1   9   9 37063.0 2275.47   1
  -1   9   8 8755.15 1121.39   1
   1  -9  -8 8055.67 1037.17   2
   1  -9  -7 14409.9 1347.24   2
  -1   9   7 16539.1 1439.25   1
   1  -9  -6 2313.95 540.493   1
  -1   9   6 2863.79 594.537   1
   1  -9  -6 2868.27 609.868   3
   1  -9  -5-43.2819 138.094   2
  -1   9   5 417.670 257.533   3
   1  -9  -5 496.971 238.736   1
  -1   9   5 591.661 277.631   1
   1  -9  -5 448.515 264.367   3
  -1   9   4 1393.93 352.934   1
   1  -9  -4 1388.85 412.146   3
   1  -9  -4 1225.70 312.073   2
   1  -9  -3-15.7435 139.988   3
  -1   9   3 115.822 109.978   1
   1  -9  -2 6653.72 868.172   3
  -1   9   2 6031.56 719.543   1
  -1   9   1 5527.12 687.121   1
   1  -9  -1 7347.98 893.013   3
   1  -9  -1 6627.34 756.369   1
  -1   9   0 43775.0 1799.23   1
   1  -9   0 46351.8 2214.11   3
   1  -9   0 49694.0 1333.38   2
   1  -9   1 93329.8 1663.25   2
   1  -9   1 91638.3 3069.59   3
   1  -9   2 126.430 63.3601   2
   1  -9   2 93.8118 122.199   1
   1  -9   2 96.9720 141.933   3
   1  -9   3 1023.19 169.249   2
   1  -9   3 967.987 273.839   1
   1  -9   3 715.161 276.089   3
   1  -9   4 34630.3 1856.98   3
  -1   9  -4 36281.9 1064.85   2
   1  -9   4 38902.2 1188.41   2
   1  -9   5 198.780 222.963   3
   1  -9   5 149.580 94.5613   2
  -1   9  -5 89.5016 56.9012   2
   1  -9   6 1137.34 235.006   2
   1  -9   6 1066.94 332.892   3
  -1   9  -6 979.528 197.258   2
  -1   9  -7 382.966 132.414   2
  -1   9  -7 219.054 165.974   3
   1  -9   7 245.509 158.687   2
   1  -9   7 440.347 223.886   3
  -1   9  -8 4462.46 524.838   2
   1  -9   8 3455.43 615.998   3
   1  -9   8 4345.61 570.075   2
  -1   9  -8 5003.99 734.978   3
  -1   9  -9 1549.20 420.619   3
   1  -9   9 1641.43 374.781   2
  -1   9  -9 1612.60 331.458   2
  -1   9 -10 14406.1 1313.58   3
   1  -9  10 14035.4 1136.44   2
  -1   9 -10 13262.4 1027.44   2
  -1   9 -11 4177.77 628.883   2
   1  -9  11 5119.67 729.715   2
  -1   9 -11 4586.99 764.874   3
  -1   9 -12 32753.1 1854.23   2
   1  -9  12 30439.0 1864.16   2
  -1   9 -12 34369.0 2138.00   3
  -1   9 -13 1148.86 362.066   3
  -1   9 -14 886.180 349.929   3
  -1   9 -15 1671.28 477.609   3
  -1   9 -16 517.958 207.652   3
  -1   9 -17 2601.73 726.643   3
  -1   9 -18 5423.26 1004.93   3
  -1   9 -19-60.2634 163.334   3
   1  -9  19 330.093 321.013   1
  -1   9 -20-216.009 325.748   3
   1  -9  20-324.281 166.609   1
  -1   8  17 193.610 288.230   1
  -1   8  16-231.266 234.641   1
  -1   8  15 1935.13 601.958   1
  -1   8  14 3966.66 874.583   1
  -1   8  13 2315.72 643.108   1
  -1   8  12 32008.2 2247.70   1
  -1   8  11 4476.56 867.754   1
  -1   8  10 165.465 160.681   1
   1  -8  -9 1057.19 342.201   2
  -1   8   9 1036.89 343.663   1
   1  -8  -8 7197.09 935.797   2
  -1   8   8 7668.81 951.389   1
   1  -8  -7 30067.4 1856.59   3
  -1   8   7 29463.1 1795.54   1
   1  -8  -7 33528.3 1923.06   2
  -1   8   6 931.919 331.857   1
   1  -8  -6 1390.98 397.508   3
   1  -8  -6 1592.06 415.915   1
  -1   8   5 40901.8 2122.15   3
   1  -8  -5 41095.4 1863.29   2
  -1   8   5 36167.9 1868.73   1
   1  -8  -5 38280.5 2007.24   3
  -1   8   4 25587.5 1532.93   1
   1  -8  -4 26448.2 1349.61   2
   1  -8  -4 28545.8 1701.10   3
   1  -8  -3 316.933 174.711   1
   1  -8  -3 713.848 290.641   3
   1  -8  -3 476.478 187.424   2
  -1   8   3 231.439 114.308   1
   1  -8  -2 302.044 207.765   1
   1  -8  -2 285.927 172.937   3
  -1   8   2 154.594 116.609   1
   1  -8  -1 11934.7 959.841   1
  -1   8   1 8374.84 759.145   1
   1  -8  -1 10733.7 1037.53   3
   1  -8   0 2517.26 446.212   1
  -1   8   0 1522.05 336.171   1
   1  -8   0 1999.78 253.031   2
   1  -8   0 2127.17 449.162   3
   1  -8   1 7695.77 755.496   1
   1  -8   1 7561.93 424.664   2
   1  -8   1 7315.86 817.031   3
   1  -8   2 10061.2 839.131   1
   1  -8   2 8528.13 427.566   2
   1  -8   2 8271.49 845.112   3
   1  -8   3 33939.7 1715.13   3
   1  -8   3 35831.4 976.324   2
   1  -8   4 5099.16 395.740   2
  -1   8  -4 5516.20 393.713   2
   1  -8   4 4728.17 644.313   3
  -1   8  -5 57602.5 1426.40   2
   1  -8   5 55493.9 2235.21   3
   1  -8   5 58954.6 1544.96   2
   1  -8   6-141.328 131.954   3
  -1   8  -6 25.8246 70.2206   2
   1  -8   6 206.096 161.616   2
   1  -8   7 1175.00 346.083   3
   1  -8   7 1767.67 348.544   2
  -1   8  -7 1425.78 275.770   2
   1  -8   8 1993.09 408.295   2
  -1   8  -8 2328.65 392.642   2
  -1   8  -9 328.316 191.812   2
  -1   8  -9 114.051 103.104   3
   1  -8   9 319.928 170.965   2
   1  -8  10 2225.23 432.068   2
  -1   8 -10 1928.34 436.243   3
  -1   8 -10 1770.35 363.453   2
  -1   8 -11 5177.04 785.316   3
  -1   8 -11 5664.24 736.062   2
   1  -8  11 5567.44 749.811   2
   1  -8  12 15409.8 1340.36   2
  -1   8 -12 15913.5 1303.60   2
  -1   8 -12 16926.1 1486.86   3
  -1   8 -13 19045.0 1631.87   3
  -1   8 -14 17319.7 1615.73   3
  -1   8 -15 6643.33 1019.91   3
  -1   8 -16 1397.27 510.338   3
  -1   8 -17 153.381 232.121   3
  -1   8 -18 1396.97 550.819   3
   1  -8  18 970.319 509.314   1
  -1   8 -19 1202.81 507.591   3
   1  -8  19 1112.33 543.465   1
  -1   8 -20 1178.74 544.394   3
   1  -8  20 392.588 541.724   1
  -1   7  18 817.299 420.592   1
  -1   7  17 3388.73 915.189   1
  -1   7  16 650.708 398.139   1
  -1   7  15 1170.74 466.957   1
  -1   7  14 2418.47 714.908   1
  -1   7  13 438.009 389.940   1
  -1   7  12 26012.8 1991.83   1
  -1   7  11 957.497 397.540   1
  -1   7  10 1173.01 412.380   1
   1  -7  -9 29548.9 1864.71   3
  -1   7   9 28858.2 1838.53   1
   1  -7  -8 16816.4 1422.58   1
  -1   7   8 13678.3 1209.33   1
   1  -7  -8 16973.2 1395.40   2
  -1   7   7 1299.30 388.265   1
   1  -7  -7 916.232 322.111   3
   1  -7  -7 1373.50 395.991   1
   1  -7  -6 744.847 278.082   3
  -1   7   6 783.927 310.057   1
  -1   7   5 4551.29 683.506   3
  -1   7   5 3621.01 536.844   1
   1  -7  -5 4585.57 573.271   2
   1  -7  -5 4592.34 647.165   3
   1  -7  -4 59013.6 1934.27   2
   1  -7  -4 65681.4 2286.02   1
  -1   7   4 60609.4 2195.90   1
   1  -7  -4 64849.1 2394.30   3
   1  -7  -3 72.8608 93.8737   3
  -1   7   3 198.932 142.588   1
   1  -7  -3 43.3904 112.327   1
   1  -7  -3 95.2166 96.9479   2
   1  -7  -2 79284.6 2283.09   1
  -1   7   2 76987.5 2206.27   1
   1  -7  -1 5425.88 588.910   1
   1  -7  -1 5329.34 676.667   3
  -1   7   1 4686.89 517.856   1
   1  -7   0-221.264 213.331   3
  -1   7   0-46.2363 111.963   1
   1  -7   0 86.0425 90.8301   1
   1  -7   1 29530.5 730.368   2
   1  -7   1 31528.1 1554.40   3
   1  -7   2 34245.2 1425.37   1
   1  -7   2 32173.5 1560.69   3
   1  -7   2 32090.2 757.005   2
   1  -7   3-124.789 154.888   3
   1  -7   3-1.52170 39.2258   2
  -1   7  -3 25.9097 48.5183   2
   1  -7   4 1082.84 259.864   3
   1  -7   4 1038.95 175.805   2
  -1   7  -4 770.035 156.109   2
   1  -7   5 109875. 2113.00   2
   1  -7   5 103833. 2885.68   3
  -1   7  -5 104484. 2847.88   3
  -1   7  -5 109109. 1975.57   2
   1  -7   6 49392.4 2038.40   3
  -1   7  -6 54508.7 1558.49   2
   1  -7   6 53902.2 1666.05   2
   1  -7   7 4381.31 621.998   3
  -1   7  -7 4958.28 524.650   2
   1  -7   7 4554.37 534.834   2
   1  -7   8 120.653 130.833   2
  -1   7  -8 176.415 144.987   2
  -1   7  -9 929.410 257.812   2
   1  -7   9 717.161 246.151   2
  -1   7 -10 30462.2 1635.53   2
  -1   7 -10 31196.8 1855.51   3
   1  -7  10 28735.7 1593.53   2
  -1   7 -11 2676.20 526.469   3
   1  -7  11 2698.74 531.470   2
  -1   7 -11 2637.34 520.249   2
  -1   7 -12 38801.2 2067.37   2
  -1   7 -12 38962.2 2209.35   3
  -1   7 -13 6203.12 918.769   3
  -1   7 -14-36.7661 180.412   3
  -1   7 -15 260.322 217.477   3
   1  -7  16 767.899 420.998   1
  -1   7 -16 972.528 387.779   3
  -1   7 -17 3760.68 802.195   3
   1  -7  17 4869.66 971.280   1
   1  -7  18 501.946 411.092   1
  -1   7 -18 388.917 211.539   3
  -1   7 -19 61.6399 278.781   3
   1  -7  19 247.146 361.570   1
   1  -7  20 451.566 420.250   1
  -1   7 -20-536.983 326.741   3
  -1   7 -21-26.3984 179.998   3
  -1   6  18 1603.16 632.370   1
  -1   6  17 9378.54 1455.47   1
  -1   6  16 349.538 343.647   1
  -1   6  15 14621.8 1664.38   1
  -1   6  14 264.244 212.819   1
  -1   6  13 14311.9 1537.32   1
  -1   6  12 3712.78 744.887   1
  -1   6  11 691.287 338.605   1
  -1   6  10 30577.8 1978.12   1
   1  -6 -10 34458.8 2126.79   2
   1  -6  -9 8148.90 944.538   3
  -1   6   9 10571.6 1111.23   1
   1  -6  -9 7802.64 978.925   2
  -1   6   8 16563.9 1311.51   1
   1  -6  -8 16255.2 1358.09   1
   1  -6  -8 18535.3 1399.78   2
   1  -6  -8 16768.2 1309.12   3
  -1   6   7 32942.2 1729.76   1
   1  -6  -7 37468.1 1881.45   3
   1  -6  -7 36650.0 1895.51   1
   1  -6  -6 1204.47 310.451   3
   1  -6  -6 1365.85 339.851   2
  -1   6   6 1330.29 344.227   1
  -1   6   5 56941.4 2046.62   1
   1  -6  -5 64900.3 2165.66   2
   1  -6  -5 62848.1 2268.50   3
  -1   6   5 71210.0 2491.89   3
   1  -6  -5 63785.4 2187.58   1
   1  -6  -4 75859.9 2130.36   2
   1  -6  -4 77955.5 2324.83   1
  -1   6   4 71100.6 2180.07   1
   1  -6  -4 77569.7 2447.54   3
   1  -6  -3 148995. 3332.54   3
   1  -6  -3 148222. 3002.53   1
  -1   6   3 140890. 2975.72   1
   1  -6  -2 59109.0 1773.71   1
   1  -6  -2 56426.7 1414.85   2
  -1   6   2 60685.2 1862.38   1
  -1   6   1 71870.6 1877.31   1
   1  -6  -1 74841.9 1990.87   1
  -1   6   0 1447.94 251.092   1
   1  -6   0 1851.74 358.964   3
   1  -6   0 1774.24 304.838   1
   1  -6   1 1087.87 242.933   1
   1  -6   1 1230.31 293.287   3
   1  -6   1 965.855 111.097   2
   1  -6   2 9358.40 686.862   1
   1  -6   2 8110.87 726.659   3
   1  -6   2 8849.81 368.155   2
  -1   6  -2 8261.10 351.297   2
  -1   6  -3 4543.62 305.157   2
   1  -6   3 5205.90 583.528   3
   1  -6   3 4328.35 290.404   2
   1  -6   4 24768.3 880.081   2
  -1   6  -4 23418.5 800.331   2
   1  -6   4 22402.3 1244.70   3
   1  -6   5 2251.82 412.337   3
   1  -6   5 2729.88 332.873   2
  -1   6  -5 2747.48 325.401   2
   1  -6   6 3765.06 516.912   3
  -1   6  -6 4102.51 438.086   2
   1  -6   6 4289.98 478.451   2
  -1   6  -6 4391.71 533.967   3
  -1   6  -7 439.292 210.825   2
   1  -6   7 451.114 201.859   2
   1  -6   8 1528.75 320.350   2
  -1   6  -8 1281.87 308.364   2
  -1   6  -9 16.5931 86.1945   2
   1  -6   9-60.4778 204.455   2
   1  -6  10 10232.7 950.127   2
  -1   6 -10 10565.8 1041.70   3
  -1   6 -10 9835.17 953.077   2
  -1   6 -11 14329.3 1221.28   2
  -1   6 -11 15741.5 1325.74   3
  -1   6 -12 39980.4 2215.47   3
  -1   6 -12 35387.9 2009.42   2
  -1   6 -13 16547.0 1431.10   3
  -1   6 -14 152.856 227.147   3
  -1   6 -15-147.781 264.098   3
   1  -6  15-166.551 280.290   1
   1  -6  16 3307.93 814.664   1
  -1   6 -16 2285.36 583.615   3
  -1   6 -17 1193.99 443.513   3
   1  -6  17 776.522 349.930   1
   1  -6  18-1.80174 156.261   1
  -1   6 -18-64.8807 145.492   3
   1  -6  19 616.770 355.812   1
  -1   6 -19 391.070 236.585   3
   1  -6  20 2179.03 695.493   1
  -1   6 -20 3236.68 825.122   3
  -1   6 -21 2577.48 786.822   3
  -1   5  18 931.913 492.992   1
  -1   5  17-193.899 193.058   1
  -1   5  16 2276.77 703.849   1
  -1   5  15 3842.25 858.719   1
  -1   5  14-99.2455 199.197   1
  -1   5  13-71.4675 245.921   1
  -1   5  12 24042.6 1877.34   1
  -1   5  11 6401.36 931.345   1
   1  -5 -11 4820.75 747.839   3
  -1   5  10 183.132 202.524   1
   1  -5 -10 87.3440 119.191   3
   1  -5 -10 18.1387 117.545   2
   1  -5  -9 6372.11 836.615   2
   1  -5  -9 6640.40 796.967   3
  -1   5   9 6092.82 818.256   1
  -1   5   8 4960.83 679.156   1
   1  -5  -8 5642.94 719.150   3
   1  -5  -7 3030.26 514.824   3
  -1   5   7 2663.10 495.979   1
   1  -5  -6 17075.1 1159.06   3
  -1   5   6 14575.5 1064.26   1
   1  -5  -6 15864.8 1088.94   2
  -1   5   5 54853.5 1901.93   1
   1  -5  -5 59240.3 2054.04   3
   1  -5  -5 57330.5 1917.89   2
   1  -5  -4 89358.4 2430.08   3
   1  -5  -4 85665.8 2144.91   2
   1  -5  -3 2143.40 361.711   3
   1  -5  -3 2156.10 342.139   1
   1  -5  -3 2198.88 315.688   2
  -1   5   3 2139.22 352.555   1
   1  -5  -2 20793.0 810.648   2
  -1   5   2 23316.6 1032.59   1
   1  -5  -2 24902.5 1219.86   3
   1  -5  -2 22036.4 989.617   1
   1  -5  -1 6206.80 349.184   2
   1  -5  -1 6758.77 533.873   1
   1  -5  -1 7416.90 671.688   3
  -1   5   1 6751.62 534.378   1
  -1   5   0 27199.3 974.044   1
   1  -5   0 30928.7 1108.88   1
   1  -5   0 28080.3 1233.51   3
   1  -5   1 24899.8 1153.55   3
   1  -5   1 26983.7 987.767   1
   1  -5   2 158789. 1418.40   2
  -1   5  -2 161339. 1386.25   2
  -1   5  -3 46863.1 976.119   2
   1  -5   3 46794.1 1647.64   3
   1  -5   3 50128.6 1074.24   2
  -1   5  -4 10588.0 562.495   2
   1  -5   4 11489.9 622.454   2
   1  -5   4 11065.0 815.484   3
   1  -5   5 4151.99 517.098   3
   1  -5   5 4222.60 420.409   2
  -1   5  -5 4418.91 416.081   2
  -1   5  -6 4913.43 593.448   3
  -1   5  -6 5581.65 532.934   2
   1  -5   6 4931.70 485.470   2
  -1   5  -7 19568.2 1082.14   2
  -1   5  -7 20247.0 1253.96   3
   1  -5   7 18227.0 1038.52   2
   1  -5   8 5424.95 616.957   2
  -1   5  -8 6292.28 660.513   2
   1  -5   9 7881.43 795.829   2
  -1   5  -9 7837.44 783.560   2
  -1   5 -10 7478.52 822.255   2
  -1   5 -11 33383.0 1929.60   3
  -1   5 -11 33975.3 1849.00   2
  -1   5 -12 5130.73 770.101   3
  -1   5 -12 5146.85 755.183   2
  -1   5 -13 4806.23 757.481   3
   1  -5  14-175.469 231.798   1
  -1   5 -14-130.153 310.090   3
   1  -5  15 504.497 153.454   1
  -1   5 -15 633.071 295.488   3
  -1   5 -16 557.240 294.148   3
   1  -5  16 485.714 153.444   1
   1  -5  17 754.969 410.219   1
  -1   5 -17 972.150 406.917   3
  -1   5 -18 235.744 266.585   3
   1  -5  18 102.048 192.225   1
  -1   5 -19 815.160 449.846   3
   1  -5  19 6.78666 114.001   1
  -1   5 -20 1040.52 490.574   3
   1  -5  20 550.421 341.864   1
  -1   5 -21 1856.40 674.042   3
  -1   4  19 1691.77 695.784   1
  -1   4  18 6086.36 1143.88   1
  -1   4  17 9229.68 1391.22   1
  -1   4  16 668.596 411.595   1
  -1   4  15 1111.64 401.143   1
  -1   4  14 795.243 365.478   1
  -1   4  13 112.958 168.936   1
  -1   4  12 4717.13 804.064   1
   1  -4 -12 3816.18 703.662   3
  -1   4  11 9918.49 1140.51   1
   1  -4 -11 7612.76 928.618   3
  -1   4  10 32633.4 1970.46   1
   1  -4 -10 32612.7 1898.85   2
   1  -4 -10 26815.1 1666.90   3
  -1   4   9 18688.4 1422.61   1
   1  -4  -9 18887.6 1393.20   2
   1  -4  -9 18851.3 1314.80   3
   1  -4  -8 60464.8 2233.73   3
  -1   4   8 60562.6 2368.75   1
   1  -4  -7 20336.2 1279.69   2
  -1   4   7 22930.2 1368.71   1
   1  -4  -7 21428.1 1263.76   3
   1  -4  -6 15631.4 1037.54   2
   1  -4  -6 16623.1 1063.94   3
  -1   4   6 16465.1 1087.01   1
   1  -4  -5 16000.4 1001.50   3
  -1   4   5 14457.5 947.234   1
   1  -4  -5 14504.1 934.384   2
   1  -4  -4 18020.0 935.956   2
   1  -4  -4 20295.9 1052.60   3
  -1   4   4 21440.7 1143.36   3
  -1   4   4 18730.5 978.989   1
   1  -4  -3 72426.8 1661.18   2
  -1   4   3 75291.4 1768.81   1
   1  -4  -3 76964.2 1975.74   3
  -1   4   2 180707. 2498.66   1
   1  -4  -2 173992. 2184.13   2
  -1   4   1 269691. 2901.28   1
   1  -4  -1 260528. 3532.13   3
  -1   4   0 319417. 2782.65   1
   1  -4   0 308581. 3690.69   3
   1  -4   1 8375.50 464.110   1
   1  -4   1 7815.49 584.892   3
  -1   4  -2 191900. 1559.53   2
   1  -4   2 189898. 2952.54   3
  -1   4  -3 157618. 1856.30   2
   1  -4   3 153030. 2736.41   3
  -1   4  -4 4032.91 341.605   2
   1  -4   4 4490.35 392.083   2
   1  -4   4 4280.41 484.242   3
   1  -4   5 7689.86 564.762   2
  -1   4  -5 6388.00 486.352   2
   1  -4   6 91159.3 2162.36   2
  -1   4  -6 74304.9 1805.54   2
   1  -4   7 39491.1 1541.83   2
  -1   4  -7 42036.0 1767.62   3
  -1   4  -8 25540.3 1273.98   2
  -1   4  -9 3101.60 472.406   2
  -1   4 -10 178.341 145.374   2
  -1   4 -11 13313.3 1126.06   2
   1  -4  12 19749.3 1597.74   1
   1  -4  13 22.5372 158.135   1
   1  -4  14 340.879 300.962   1
   1  -4  15 305.356 286.933   1
   1  -4  16 2368.10 660.430   1
  -1   4 -16 3295.45 754.035   3
   1  -4  17 1989.32 632.008   1
  -1   4 -17 2419.78 669.628   3
  -1   4 -18 1743.10 600.603   3
   1  -4  18 2771.98 760.782   1
  -1   4 -19 348.857 301.506   3
   1  -4  19-349.610 316.599   1
  -1   4 -20 274.944 195.782   3
   1  -4  20 185.905 296.300   1
  -1   4 -21 518.496 370.974   3
  -1   3  19 11.0723 140.964   1
  -1   3  18 470.986 332.059   1
  -1   3  17 1108.24 476.178   1
  -1   3  16 4061.74 895.999   1
  -1   3  15 8539.45 1225.50   1
  -1   3  14 1775.10 545.744   1
  -1   3  13 822.590 238.846   1
   1  -3 -13 283.204 177.018   3
   1  -3 -12 2411.18 517.231   3
  -1   3  12 2345.16 549.591   1
  -1   3  11 2435.82 597.841   1
   1  -3 -11 2412.79 559.729   2
   1  -3 -11 1528.35 391.786   3
  -1   3  10 38462.0 2034.73   1
   1  -3 -10 38988.1 1879.22   3
   1  -3  -9 78.7702 90.7726   3
  -1   3   9 186.200 218.924   1
  -1   3   8 75105.9 2555.64   1
   1  -3  -8 80625.2 2456.35   3
  -1   3   7 94645.5 2659.09   1
  -1   3   7 91547.5 2400.49   2
   1  -3  -6 924.906 267.911   3
  -1   3   6 989.373 241.476   2
  -1   3   6 718.904 235.848   1
  -1   3   5 6233.85 607.446   1
  -1   3   5 6498.64 589.498   2
   1  -3  -5 7264.98 610.028   3
  -1   3   4 54.0337 111.133   3
  -1   3   4 46.8204 112.507   2
  -1   3   4 49.3386 110.757   1
   1  -3  -4 226.447 130.637   3
  -1   3   3 15162.3 674.479   2
  -1   3   3 15516.3 756.435   1
   1  -3  -3 15641.6 788.594   3
  -1   3   2 65888.0 1232.73   2
   1  -3  -2 68633.6 1609.57   3
  -1   3   2 62970.8 1313.11   1
   1  -3  -1 374601. 3596.86   3
  -1   3   1 371023. 2733.04   1
  -1   3   1 382292. 2215.97   2
   1  -3   0 223048. 2736.60   3
  -1   3   0 228367. 1859.86   1
   1  -3   1 187886. 2576.79   3
  -1   3  -2 94733.1 1206.98   2
   1  -3   2 82737.5 1796.74   3
  -1   3  -3 14884.3 599.212   2
   1  -3   3 13818.7 782.980   3
  -1   3  -4 74156.6 1551.63   2
  -1   3  -5 2268.94 302.963   2
  -1   3  -6 31519.6 1256.37   2
  -1   3  -7 53576.6 1803.80   2
  -1   3  -8 6486.70 674.337   2
  -1   3  -9 3063.31 499.572   2
   1  -3  10 5306.54 765.791   1
  -1   3 -10 4081.14 579.005   2
  -1   3 -11 24562.7 1483.51   2
   1  -3  11 30509.2 1890.04   1
   1  -3  12 287.444 168.888   1
   1  -3  13 5441.81 871.070   1
   1  -3  14 342.401 147.954   1
   1  -3  15 8315.22 1173.63   1
   1  -3  16 2387.95 662.422   1
   1  -3  17 314.997 320.016   1
   1  -3  18 7695.61 1217.88   1
   1  -3  19 1836.43 622.505   1
  -1   3 -20 1427.44 587.765   3
   1  -3  20 1529.40 617.894   1
  -1   3 -21 5555.50 1159.57   3
  -1   2  19 1309.59 473.279   1
  -1   2  18 924.730 448.787   1
  -1   2  17 336.385 286.218   1
  -1   2  16 1643.32 537.309   1
  -1   2  15 9260.57 1229.12   1
  -1   2  14 1201.54 438.305   1
  -1   2  13 13585.4 1393.69   1
  -1   2  12 17566.7 1537.65   1
   1  -2 -11 2574.37 551.076   2
  -1   2  11 3278.13 655.650   1
  -1   2  10 17890.1 1260.49   2
  -1   2  10 20512.1 1498.84   1
  -1   2   9 3941.39 559.548   2
  -1   2   9 5416.32 721.530   1
  -1   2   8 1379.94 345.560   1
  -1   2   8 1282.85 306.902   2
   1  -2  -7 34505.0 1402.10   3
  -1   2   7 33490.9 1468.18   2
  -1   2   7 34297.7 1603.53   1
  -1   2   6 24644.1 1210.65   2
  -1   2   6 23312.2 1241.34   1
   1  -2  -6 23529.7 1086.96   3
   1  -2  -5 1132.75 227.322   3
  -1   2   5 1175.77 269.670   1
  -1   2   5 1330.66 263.215   2
   1  -2  -4 84655.5 1739.72   3
  -1   2   4 89340.3 1980.27   1
  -1   2   3 60734.4 1427.30   1
  -1   2   3 62620.3 1407.74   3
   1  -2  -3 61326.9 1354.40   3
  -1   2   2 442455. 3191.48   1
   1  -2  -2 443425. 3439.72   3
  -1   2   1 128735. 1265.36   1
  -1   2   1 129091. 1270.39   2
   1  -2   1 50311.8 1197.78   3
  -1   2  -3 16564.5 664.637   2
  -1   2  -4 49623.6 1323.66   2
  -1   2  -5 44624.3 1441.11   2
  -1   2  -6 8581.59 686.097   2
   1  -2   7 11.5999 153.328   1
  -1   2  -7 81.6895 89.1499   2
   1  -2   8 7482.52 807.745   1
  -1   2  -8 6568.92 699.812   2
  -1   2  -9 816.623 257.754   2
   1  -2   9 795.001 302.032   1
  -1   2 -10 15785.0 1219.89   2
   1  -2  10 17900.0 1353.24   1
  -1   2 -11 9620.45 999.405   2
   1  -2  11 9688.80 1080.75   1
   1  -2  12 8496.68 1017.40   1
   1  -2  13 7197.89 1028.34   1
   1  -2  14 5618.83 936.809   1
   1  -2  15-49.5947 159.938   1
   1  -2  16-14.7583 176.821   1
   1  -2  17 308.656 190.183   1
   1  -2  18 2292.88 697.914   1
   1  -2  19 268.468 128.394   1
   1  -2  20 950.496 556.486   1
  -1   1  20 200.496 295.131   1
  -1   1  19 4840.53 1028.19   1
  -1   1  18 622.232 293.236   1
  -1   1  17-200.704 297.780   1
  -1   1  16 1495.14 534.969   1
  -1   1  15 746.568 386.445   1
  -1   1  14-62.9713 296.366   1
  -1   1  13 8896.14 1141.72   1
  -1   1  12 5558.78 764.680   2
  -1   1  12 6085.51 929.526   1
  -1   1  11 10782.4 1033.68   2
  -1   1  11 13893.1 1289.99   1
  -1   1  10 133.138 212.399   2
  -1   1  10 219.064 209.272   1
  -1   1   9 80199.5 2805.52   1
  -1   1   9 74693.3 2471.75   2
  -1   1   8 882.245 287.880   2
  -1   1   8 1000.01 314.220   1
  -1   1   7 4512.56 546.815   1
  -1   1   7 4988.58 594.461   2
  -1   1   6 27613.0 1241.71   2
  -1   1   5 171.308 82.5123   2
   1  -1  -4 6378.13 419.634   3
  -1   1   4 7005.20 533.663   2
   1  -1  -3 73271.1 1226.74   3
  -1   1   3 71190.0 1235.48   3
  -1   1   2 24186.2 768.808   2
   1  -1   3 46646.2 1210.78   1
   1  -1   4 12818.6 740.159   1
   1  -1   5 40943.1 1468.37   1
   1  -1   6 115673. 2683.28   1
   1  -1   7 19075.7 1192.92   1
   1  -1   8 3533.90 538.185   1
  -1   1  -9-13.7753 96.7856   2
   1  -1   9 21.0867 121.934   1
   1  -1  10 4185.35 653.291   1
  -1   1 -10 3995.92 633.319   2
   1  -1  11 2956.77 593.533   1
  -1   1 -11 3001.73 580.936   2
   1  -1  12 3401.45 688.314   1
   1  -1  13 3329.34 687.826   1
   1  -1  14 285.042 266.311   1
   1  -1  15 25255.7 2051.82   1
   1  -1  16 11114.8 1446.56   1
   1  -1  17 2428.51 677.359   1
   1  -1  18 2779.89 777.017   1
   1  -1  19-352.312 431.676   1
  -1   0  20-116.310 230.574   1
  -1   0  19 458.469 367.603   1
  -1   0  18 21.5163 210.811   1
  -1   0  17 264.339 141.619   1
  -1   0  16 13964.5 1582.28   1
  -1   0  15 13538.4 1602.11   1
  -1   0  14 17801.6 1505.62   2
  -1   0  14 21435.4 1845.21   1
  -1   0  13-133.638 223.400   1
  -1   0  13-26.4989 228.953   2
  -1   0  12-61.5076 200.152   1
  -1   0  12-257.129 255.052   2
  -1   0  11 517.917 202.940   2
  -1   0  11 248.962 122.492   1
  -1   0  10 15357.4 1191.42   2
  -1   0   9 10038.3 930.237   2
  -1   0   8 9692.45 853.310   2
  -1   0   7 1550.03 343.182   2
  -1   0   6 6870.93 615.592   2
  -1   0   5 924.230 230.094   2
  -1   0   4 240482. 3093.87   2
  -1   0   3 136289. 2051.01   2
   1   0   2 4279.42 350.061   1
   1   0   3 800.886 201.780   1
   1   0   4-4.31835 76.2264   1
   1   0   5 528.217 180.709   1
   1   0   6 2209.50 376.767   1
   1   0   7 182345. 3701.08   1
   1   0   8 27061.2 1519.31   1
   1   0   9 3848.30 631.560   1
   1   0  10 36828.6 1972.16   1
  -1   0 -10 37833.9 1998.42   2
   1   0  11 15258.7 1336.82   1
   1   0  12 8210.56 1040.42   1
   1   0  13 186.572 214.236   1
   1   0  14 8646.58 1187.32   1
   1   0  15 338.507 481.609   1
   1   0  16 296.226 233.029   1
   1   0  17 11498.7 1497.82   1
   1   0  18 2504.46 730.899   1
   1   0  19 3226.59 891.777   1
  -1  -1  20 4066.40 999.001   1
  -1  -1  19 5134.13 1088.00   1
  -1  -1  18 1239.73 569.340   1
  -1  -1  17 2322.78 682.782   1
  -1  -1  16 2267.59 662.819   1
  -1  -1  15 16259.9 1502.33   2
  -1  -1  15 19612.1 1836.00   1
  -1  -1  14 86.0477 230.262   1
  -1  -1  14 495.779 253.035   2
  -1  -1  13 3524.88 686.572   2
  -1  -1  13 4547.72 818.749   1
  -1  -1  12 5412.57 765.609   2
  -1  -1  11 773.235 262.718   2
   1   1 -11 764.261 300.199   2
  -1  -1  10 27905.7 1626.86   2
  -1  -1   9 40420.2 1837.80   2
  -1  -1   8 10338.5 874.399   2
  -1  -1   7 4964.80 564.173   2
  -1  -1   6 21.8583 111.056   2
  -1  -1   5 20278.3 1048.12   2
  -1  -1   4 38476.2 1308.36   2
  -1  -1   3 32155.1 1053.26   2
   1   1   1 73319.9 1462.05   1
   1   1   2 296863. 3588.26   1
   1   1   3 189151. 2747.05   1
   1   1   4 2705.65 392.937   1
   1   1   5 24876.1 1221.56   1
   1   1   6 52200.1 1891.13   1
   1   1   7 96343.7 2772.34   1
   1   1   8 2041.20 446.210   1
   1   1   9 2856.04 552.634   1
  -1  -1 -10 15193.7 1304.85   2
   1   1  10 15497.3 1310.73   1
   1   1  11 11584.1 1212.08   1
   1   1  12 39838.5 2332.06   1
   1   1  13 279.517 158.326   1
   1   1  14 4074.14 812.671   1
   1   1  15 231.423 259.871   1
   1   1  16 583.037 314.640   1
   1   1  17 3243.25 842.551   1
   1   1  18 2534.48 724.117   1
   1   1  19 4130.75 986.824   1
  -1  -2  20 3363.30 863.834   1
  -1  -2  19 5251.61 1058.46   1
  -1  -2  18 2143.94 764.361   1
  -1  -2  17 894.338 490.959   1
  -1  -2  16 1780.84 573.455   1
  -1  -2  16 830.768 332.276   2
  -1  -2  15 1917.03 562.164   1
  -1  -2  15 1816.10 536.286   2
  -1  -2  14 2704.81 580.848   2
  -1  -2  13 8109.03 995.754   2
  -1  -2  12 5464.77 799.420   2
  -1  -2  11 525.891 227.807   2
   1   2 -11 760.761 297.694   2
   1   2 -10 2254.80 446.263   2
  -1  -2  10 2168.04 441.941   2
  -1  -2   9 325.167 229.852   2
  -1  -2   8 6591.44 684.602   2
  -1  -2   7 36809.8 1486.29   2
  -1  -2   6 764.263 236.711   2
  -1  -2   5 38.2779 81.1654   2
   1   2  -5 144.606 72.8748   3
   1   2  -4 178664. 1703.88   3
  -1  -2   4 189289. 2763.34   2
   1   2  -3 491012. 2777.08   3
  -1  -2   3 491517. 4242.24   2
  -1  -2   2 827.598 127.142   3
  -1  -2   2 624.476 158.215   2
  -1  -2   1 247748. 2489.89   3
  -1  -2   1 216388. 2554.09   2
   1   2   0 711686. 5009.98   1
   1   2   1 294.208 88.5328   1
   1   2   2 78451.6 1830.80   1
   1   2   3-0.58498 92.3511   1
   1   2   4 13088.8 835.351   1
   1   2   5 95740.5 2488.68   1
   1   2   6 2123.94 397.459   1
   1   2   7 82570.4 2618.74   1
   1   2   8 6097.93 759.033   1
   1   2   9 8334.45 912.455   1
  -1  -2 -10 176.058 199.480   2
   1   2  10 268.330 198.011   1
   1   2  11 5704.00 844.457   1
   1   2  12 2913.86 624.008   1
   1   2  13 4467.04 824.219   1
   1   2  14 1443.03 483.586   1
   1   2  15 28.9377 178.952   1
   1   2  16 7588.38 1236.49   1
   1   2  17 4359.61 948.185   1
   1   2  18 2619.98 728.600   1
   1   2  19 392.684 182.176   1
   1   3 -20 600.489 380.331   3
  -1  -3  20 300.157 151.020   1
  -1  -3  19 949.236 523.278   1
   1   3 -19 1431.78 498.076   3
   1   3 -18 4589.27 837.812   3
  -1  -3  18 4161.83 937.011   1
   1   3 -17 10.8507 140.929   3
  -1  -3  17-164.605 254.464   2
  -1  -3  17-162.890 153.356   1
  -1  -3  16-0.64525 158.547   2
  -1  -3  16-72.3395 344.063   1
  -1  -3  15 1238.19 500.603   2
  -1  -3  14 2183.59 548.789   2
  -1  -3  13 2633.26 592.572   2
  -1  -3  12 626.744 249.583   2
   1   3 -12 157.119 176.336   2
   1   3 -11 927.460 303.985   2
  -1  -3  11 1016.69 332.224   2
  -1  -3  10-120.446 99.5740   2
   1   3 -10 27.5487 106.022   3
   1   3 -10-54.5519 182.533   2
  -1  -3   9 2470.69 441.587   2
   1   3  -9 3315.95 417.268   3
   1   3  -9 2784.51 487.673   2
   1   3  -8 26589.4 1117.29   3
   1   3  -8 23747.7 1323.55   2
  -1  -3   8 24885.4 1322.81   2
   1   3  -7 101140. 2579.93   2
   1   3  -7 105779. 2044.51   3
   1   3  -6 1266.51 197.589   3
   1   3  -6 1400.84 295.889   2
  -1  -3   6 1733.68 327.772   2
   1   3  -5 78832.3 1459.28   3
  -1  -3   5 96179.0 2230.35   2
  -1  -3   4 141.249 65.0815   3
   1   3  -4 90.9888 44.0967   3
  -1  -3   4 37.8429 127.463   2
  -1  -3   3 32040.2 865.243   3
  -1  -3   3 29965.3 1049.62   2
  -1  -3   2 25284.4 819.211   3
  -1  -3   2 25157.0 931.985   2
  -1  -3   1 19369.0 817.568   2
  -1  -3   1 19000.7 774.998   3
   1   3   0 94830.2 2033.04   1
  -1  -3   0 97793.2 1883.69   3
  -1  -3  -1 3611.34 392.477   3
   1   3   1 3502.84 416.611   1
   1   3   2 186125. 3145.16   1
   1   3   3 19427.7 1066.77   1
   1   3   4 673.647 208.690   1
   1   3   5 3059.64 457.616   1
   1   3   6 10838.2 912.087   1
   1   3   7 12619.8 1062.41   1
   1   3   8 26166.3 1604.89   1
   1   3   9 28933.3 1763.97   1
  -1  -3  -9 33894.7 2002.02   1
   1   3  10 18575.9 1511.70   1
   1   3  11 1802.72 514.654   1
   1   3  12 10488.2 1224.10   1
   1   3  13 2392.18 655.718   1
   1   3  14 7032.78 1091.56   1
   1   3  15 1717.33 580.127   1
   1   3  16 4033.21 883.674   1
   1   3  17 823.511 428.812   1
   1   3  18 2097.54 701.242   1
  -1  -4  20 2910.39 909.265   1
   1   4 -19 1367.75 469.108   3
  -1  -4  19 1453.41 547.644   1
   1   4 -18 113.667 214.679   3
  -1  -4  18 330.127 276.446   1
  -1  -4  18 456.832 407.130   2
  -1  -4  17 1019.75 383.692   2
   1   4 -17 1295.51 431.849   3
   1   4 -16 326.380 233.227   3
  -1  -4  16 455.473 269.437   2
  -1  -4  15 3331.95 741.740   2
   1   4 -15 4292.18 681.765   3
  -1  -4  14 10563.8 1199.14   2
  -1  -4  13 23357.8 1721.20   2
  -1  -4  12 1800.36 494.317   2
   1   4 -12 2402.52 513.511   2
   1   4 -12 1232.61 328.286   3
   1   4 -11 167.679 104.492   3
   1   4 -11 11.1100 188.478   2
   1   4 -10 31853.5 1434.75   3
  -1  -4  10 27989.9 1606.13   2
   1   4 -10 28314.3 1640.41   2
  -1  -4   9 10852.8 919.784   2
   1   4  -9 12544.3 1004.50   2
   1   4  -9 13414.0 864.112   3
   1   4  -8 21401.7 1029.90   3
   1   4  -8 19927.4 1204.06   2
  -1  -4   8 18676.4 1178.10   2
  -1  -4   7 8096.66 761.016   2
   1   4  -7 6629.87 645.740   2
   1   4  -7 7605.63 558.000   3
   1   4  -6 77043.4 1692.30   3
   1   4  -6 75286.6 2058.75   2
   1   4  -5 50962.5 1596.51   2
   1   4  -5 53427.5 1325.99   3
  -1  -4   5 54674.6 1685.47   2
   1   4  -4 2641.74 336.287   2
  -1  -4   4 2492.72 343.749   2
  -1  -4   4 2785.92 308.246   3
   1   4  -4 3562.11 342.136   3
  -1  -4   3 203166. 2911.31   2
   1   4  -3 200961. 2845.94   2
  -1  -4   3 192014. 2572.07   3
   1   4  -3 196256. 2590.61   3
   1   4  -2 106246. 2018.69   2
  -1  -4   2 108462. 2109.87   2
  -1  -4   2 110189. 2047.41   3
  -1  -4   1 280.504 102.095   2
  -1  -4   1 429.906 145.815   3
   1   4   0 16906.9 950.236   1
  -1  -4   0 17440.7 910.205   3
   1   4   1 2044.88 348.668   1
  -1  -4  -1 2391.04 358.296   3
  -1  -4  -2 20053.5 1097.91   3
   1   4   2 20824.5 1146.49   1
   1   4   3 163.212 114.141   1
  -1  -4  -3 144.543 138.062   3
   1   4   4 6103.68 677.167   1
   1   4   5 32717.6 1625.24   1
   1   4   6 20888.2 1348.35   1
   1   4   7 3802.41 590.181   1
   1   4   8 5866.73 815.032   1
   1   4   9 12741.1 1229.45   1
  -1  -4  -9 13623.2 1270.35   2
   1   4  10 762.687 277.893   1
   1   4  11 163.261 160.303   1
   1   4  12 4270.54 806.295   1
   1   4  13 5063.10 933.827   1
   1   4  14 543.912 378.895   1
   1   4  15 1221.37 514.506   1
   1   4  16 43.3542 282.289   1
   1   4  17-109.113 221.159   1
   1   4  18 798.719 522.794   1
  -1  -5  20 2791.98 804.184   1
   1   5 -19 124.780 120.944   3
  -1  -5  19-57.4118 262.480   1
  -1  -5  18 3107.92 723.261   2
   1   5 -18 2454.88 596.650   3
   1   5 -17 88.2053 88.4957   3
  -1  -5  17-23.8825 119.421   2
  -1  -5  16 266.345 370.474   2
   1   5 -16 286.238 213.614   3
  -1  -5  15-99.4712 286.398   2
   1   5 -15-54.1985 83.1800   3
  -1  -5  14 1188.15 463.775   2
  -1  -5  13 7304.94 976.453   2
  -1  -5  12 4660.50 725.785   2
   1   5 -12 5693.26 810.169   2
   1   5 -11 33080.0 1575.00   3
  -1  -5  11 27850.0 1700.80   2
   1   5 -10 55620.7 2227.95   2
   1   5 -10 60851.3 2007.68   3
   1   5  -9 7511.58 651.747   3
  -1  -5   9 7898.40 811.173   2
   1   5  -9 7248.83 765.987   2
   1   5  -8 6481.62 565.583   3
  -1  -5   8 5700.07 681.291   2
   1   5  -8 6185.35 688.924   2
   1   5  -7 14437.9 966.809   2
   1   5  -7 15541.5 854.754   3
  -1  -5   7 15310.0 1085.52   2
   1   5  -6 7707.99 573.145   3
  -1  -5   6 7801.28 696.846   2
  -1  -5   6 7199.36 576.018   3
   1   5  -6 7902.99 676.195   2
  -1  -5   5 17805.3 975.033   2
   1   5  -5 19009.4 891.841   3
  -1  -5   5 17233.7 871.798   3
   1   5  -5 17991.9 965.772   2
  -1  -5   4 81619.4 1979.90   2
   1   5  -4 81546.8 1992.14   2
  -1  -5   4 79794.4 1856.05   3
   1   5  -4 78462.3 1852.87   3
  -1  -5   3 107284. 2217.36   3
   1   5  -3 103495. 2112.28   3
   1   5  -3 109495. 2237.68   2
  -1  -5   3 105728. 2190.18   2
  -1  -5   2 7709.39 589.239   2
  -1  -5   2 8012.78 631.066   3
   1   5  -2 7972.73 616.073   3
  -1  -5   1 23767.1 1109.96   3
  -1  -5   1 25659.8 1111.73   2
  -1  -5   0 9631.01 743.335   3
   1   5   0 10021.6 798.234   1
   1   5   1 14690.9 985.799   1
  -1  -5  -1 15305.8 983.434   3
  -1  -5  -2 8480.05 756.902   3
   1   5   2 7801.01 740.242   1
   1   5   3-107.949 200.927   1
  -1  -5  -3 528.624 198.353   3
   1   5   4 1755.30 371.579   1
  -1  -5  -4 1176.81 309.101   3
  -1  -5  -5 4144.90 615.433   3
   1   5   5 4363.61 624.183   1
   1   5   6 6066.93 749.428   1
  -1  -5  -6 5778.81 734.894   3
   1   5   7 5034.91 717.465   1
  -1  -5  -7 6088.24 809.098   3
  -1  -5  -8 11762.6 1168.47   3
  -1  -5  -8 14301.8 1328.21   1
   1   5   8 11705.9 1141.94   1
   1   5   9 261.429 215.691   1
   1   5  10 226.258 200.842   1
   1   5  11 1357.97 380.656   1
   1   5  12 391.389 271.945   1
   1   5  13 5448.38 929.134   1
   1   5  14 1080.15 454.797   1
   1   5  15 831.684 475.081   1
   1   5  16 2923.06 788.544   1
   1   5  17 687.515 431.470   1
  -1  -6  20 223.410 304.694   1
  -1  -6  19 180.813 121.232   2
   1   6 -19 7.47339 164.220   3
  -1  -6  18 101.526 144.181   2
   1   6 -18 326.005 287.948   3
  -1  -6  17 359.138 276.433   2
   1   6 -17 384.201 241.218   3
  -1  -6  16 6416.18 1027.40   2
   1   6 -16 6414.13 869.909   3
  -1  -6  15 10888.3 1296.96   2
   1   6 -15 10236.6 1077.87   3
  -1  -6  14 21567.3 1757.06   2
  -1  -6  13 5646.39 847.863   2
  -1  -6  12 6437.83 870.476   2
   1   6 -12 7674.07 920.040   2
   1   6 -11 2156.06 385.832   3
  -1  -6  11 2212.49 485.067   2
   1   6 -11 2518.09 499.480   2
  -1  -6  10 19406.2 1326.24   2
   1   6 -10 22161.0 1426.44   2
   1   6 -10 23047.8 1267.26   3
  -1  -6   9 31318.5 1678.68   2
   1   6  -9 35235.1 1470.58   3
   1   6  -9 32497.8 1642.20   2
   1   6  -8 82934.3 2164.05   3
  -1  -6   8 81042.1 2611.88   2
   1   6  -8 80361.4 2429.81   2
   1   6  -7 51371.7 1898.78   2
   1   6  -7 49877.6 1626.73   3
  -1  -6   7 52446.5 1976.48   2
   1   6  -6 58412.9 1737.88   3
  -1  -6   6 52412.6 1693.11   3
   1   6  -6 55319.3 1814.65   2
  -1  -6   6 57298.8 1935.89   2
   1   6  -5 2905.35 408.213   2
  -1  -6   5 3107.15 441.626   2
  -1  -6   5 3377.01 428.951   3
   1   6  -5 3127.44 406.924   3
  -1  -6   4 40560.0 1477.20   3
   1   6  -4 39814.3 1408.32   3
   1   6  -4 42213.6 1506.80   2
  -1  -6   4 42407.9 1490.23   2
   1   6  -3 51636.0 1657.26   3
  -1  -6   3 54843.7 1775.45   3
   1   6  -3 52251.5 1599.94   2
  -1  -6   3 55130.1 1677.20   2
   1   6  -2 4490.13 515.665   3
  -1  -6   2 4957.35 494.388   2
  -1  -6   2 4912.65 546.755   3
  -1  -6   1 11446.1 788.995   2
  -1  -6   1 10523.4 808.309   3
   1   6  -1 10967.5 834.786   3
  -1  -6   0 16196.7 1040.50   3
   1   6   0 16051.4 1075.77   1
  -1  -6  -1 48999.4 1893.71   3
   1   6   1 47366.7 1897.48   1
   1   6   2 5394.24 643.695   1
  -1  -6  -2 5722.61 670.286   3
  -1  -6  -3 61177.9 2269.08   3
   1   6   3 62281.4 2341.84   1
  -1  -6  -4 3346.13 539.307   3
   1   6   4 3935.83 602.807   1
   1   6   5 1419.31 397.236   1
  -1  -6  -5 1331.71 368.895   3
  -1  -6  -6 8733.12 986.507   3
   1   6   6 7828.09 959.655   1
  -1  -6  -7 628.402 273.837   3
   1   6   7 645.954 279.810   1
   1   6   8 986.527 407.794   1
   1   6   9 1581.42 489.334   1
   1   6  10 45463.6 2545.53   1
   1   6  11 16989.4 1637.70   1
   1   6  12 1189.09 411.545   1
   1   6  13 22.3834 260.970   1
   1   6  14 3644.66 868.782   1
   1   6  15 14.7301 178.130   1
   1   6  16 503.511 372.261   1
   1   6  17 654.326 443.909   1
  -1  -7  19 2903.27 770.629   2
   1   7 -18-101.911 258.275   3
  -1  -7  18 402.580 349.656   2
  -1  -7  17 1450.46 526.316   2
   1   7 -17 1521.77 430.009   3
   1   7 -16 2101.81 493.545   3
  -1  -7  16 2485.59 675.545   2
   1   7 -15 4573.24 710.055   3
  -1  -7  15 4553.20 836.886   2
  -1  -7  14 641.086 277.448   2
  -1  -7  13 1926.92 422.969   2
  -1  -7  12 42213.4 2254.47   2
   1   7 -11 11810.4 1081.86   2
  -1  -7  11 10995.4 1034.11   2
   1   7 -10 8408.28 781.660   3
   1   7 -10 7790.38 840.174   2
  -1  -7  10 6690.23 805.757   2
   1   7  -9 333.895 99.9837   3
   1   7  -9 94.3308 105.183   2
  -1  -7   8 9201.13 872.812   2
  -1  -7   8 7577.06 712.818   3
   1   7  -8 8296.59 729.191   3
   1   7  -8 9695.54 869.347   2
   1   7  -7 13421.4 912.761   3
  -1  -7   7 11695.1 861.842   3
   1   7  -7 12254.4 922.988   2
  -1  -7   7 12775.0 975.577   2
   1   7  -6 10459.2 787.339   3
  -1  -7   6 9474.87 789.605   3
   1   7  -6 9665.99 792.547   2
  -1  -7   6 9022.59 806.088   2
   1   7  -5 23755.9 1178.21   3
  -1  -7   5 23195.6 1220.65   3
   1   7  -5 23601.9 1195.05   2
  -1  -7   5 22811.8 1194.18   2
   1   7  -4 3679.10 466.421   3
   1   7  -4 3286.19 427.134   2
  -1  -7   4 3395.51 451.906   2
  -1  -7   4 3690.09 503.326   3
   1   7  -3 89.2287 133.647   3
  -1  -7   3 119.922 158.032   2
  -1  -7   3 80.3287 86.9483   3
  -1  -7   2 491.519 192.436   2
   1   7  -2 276.941 137.292   3
  -1  -7   2 565.807 204.175   3
   1   7  -1 193.511 121.042   3
  -1  -7   1 148.746 84.6371   2
  -1  -7   1 224.337 145.401   3
  -1  -7   0 20341.6 1264.40   3
   1   7   0 19022.4 1246.09   1
   1   7   1 43358.9 1917.30   1
  -1  -7  -1 46817.2 1973.24   3
  -1  -7  -2 48068.2 2071.72   3
   1   7   2 45173.4 2025.82   1
   1   7   3 12867.8 1100.86   1
  -1  -7  -3 12586.0 1094.72   3
   1   7   4 9036.52 983.229   1
  -1  -7  -4 8487.29 927.964   3
   1   7   5 5430.45 766.763   1
  -1  -7  -5 5092.88 731.327   3
  -1  -7  -6 488.393 227.965   3
  -1  -7  -6 238.338 146.960   1
   1   7   6 673.066 285.675   1
   1   7   7 5123.84 803.031   1
   1   7   8 605.122 325.195   1
   1   7   9 2806.05 624.890   1
   1   7  10 2090.17 616.605   1
   1   7  11 21013.1 1871.77   1
   1   7  12 5976.75 1023.72   1
   1   7  13-448.259 396.214   1
   1   7  14 13.7048 168.967   1
   1   7  15 1672.16 609.829   1
   1   7  16 1350.48 613.164   1
  -1  -8  20-147.991 251.521   2
  -1  -8  19 6739.97 1158.82   2
  -1  -8  18 5980.93 1051.61   2
   1   8 -18 11751.8 1238.93   3
  -1  -8  17 1224.17 483.021   2
   1   8 -17 1509.27 443.513   3
  -1  -8  16 15417.5 1625.45   2
   1   8 -16 12368.6 1217.72   3
  -1  -8  15 2973.71 682.798   2
   1   8 -15 3086.95 576.190   3
   1   8 -14 9136.99 978.102   3
  -1  -8  14 11573.3 1299.61   2
  -1  -8  13 123.980 189.720   2
  -1  -8  12 31961.6 1923.65   2
   1   8 -11 11037.9 1066.57   2
  -1  -8  11 15292.8 1274.33   2
  -1  -8  10 3940.71 649.229   2
   1   8 -10 4554.51 674.605   2
  -1  -8   9 29011.4 1692.49   2
   1   8  -9 30672.7 1616.60   2
   1   8  -8 106.771 152.657   3
  -1  -8   8-69.5044 145.850   2
   1   8  -8-65.0006 82.4317   2
  -1  -8   8 58.0844 124.751   3
  -1  -8   7 1898.01 376.758   3
  -1  -8   7 2191.62 416.679   2
   1   8  -7 2006.55 390.916   3
   1   8  -7 2199.76 415.605   2
  -1  -8   6 330.649 199.849   2
   1   8  -6 127.620 112.050   2
  -1  -8   6 152.717 117.195   3
   1   8  -6 184.074 114.734   3
   1   8  -5 20697.0 1150.38   2
  -1  -8   5 19122.1 1207.72   3
   1   8  -5 18925.0 1127.53   3
  -1  -8   5 19941.4 1152.96   2
  -1  -8   4 30200.8 1544.93   3
  -1  -8   4 33465.5 1496.34   2
   1   8  -4 31334.2 1375.70   2
   1   8  -4 29500.9 1424.30   3
   1   8  -3 4079.17 561.664   3
  -1  -8   3 4909.70 560.126   2
  -1  -8   3 4848.88 644.471   3
  -1  -8   2 52634.0 2189.21   3
  -1  -8   2 51106.0 1858.29   2
  -1  -8   1 615.526 151.931   3
  -1  -8   1 925.621 248.840   2
   1   8   0 12568.2 1079.36   1
  -1  -8   0 12687.5 1077.09   3
  -1  -8  -1 2098.33 448.924   3
   1   8   1 1493.45 377.924   1
   1   8   2 160.929 186.201   1
  -1  -8  -2 33.2364 154.215   3
   1   8   3 2041.34 441.357   1
  -1  -8  -3 1938.13 481.759   3
  -1  -8  -4 62.5672 107.547   3
   1   8   4 402.063 240.714   1
  -1  -8  -5 18678.8 1495.11   3
  -1  -8  -5 20136.6 1614.04   1
   1   8   5 18083.1 1501.88   1
   1   8   6 218.491 162.063   1
   1   8   7 3409.69 680.438   1
   1   8   8 2557.66 607.851   1
   1   8   9 8059.77 1137.96   1
   1   8  10 11663.4 1449.12   1
   1   8  11 10395.0 1379.59   1
   1   8  12 365.570 335.214   1
   1   8  13-64.8736 193.983   1
   1   8  14 1332.76 585.576   1
   1   8  15 1116.85 429.568   1
  -1  -9  20 298.339 315.116   2
  -1  -9  19-90.2178 254.255   2
  -1  -9  18 3199.37 788.463   2
   1   9 -17 2306.19 521.553   3
  -1  -9  17 2445.31 691.688   2
   1   9 -16 6643.66 889.328   3
  -1  -9  16 5240.91 953.696   2
  -1  -9  15 4431.11 849.968   2
   1   9 -15 5850.21 789.883   3
   1   9 -14 260.495 125.395   3
  -1  -9  14 50.8585 154.564   2
  -1  -9  13 470.370 309.789   2
   1   9 -13 47.0307 81.6256   3
  -1  -9  12 3314.95 640.917   2
   1   9 -11 27790.4 1709.63   2
  -1  -9  11 25497.2 1680.56   2
  -1  -9  10 888.068 356.846   2
   1   9 -10 716.123 261.062   2
  -1  -9   9 17660.0 1361.42   2
   1   9  -9 16406.9 1214.34   2
   1   9  -8 30718.4 1593.89   2
  -1  -9   8 31500.6 1720.19   2
  -1  -9   8 26064.1 1505.60   3
  -1  -9   7 599.268 205.832   2
  -1  -9   7 691.129 256.165   3
   1   9  -7 819.049 258.424   2
  -1  -9   6 1879.44 417.939   2
  -1  -9   6 1814.62 407.686   3
   1   9  -6 1935.11 375.544   2
  -1  -9   5 1377.50 353.141   3
   1   9  -5 1789.30 341.389   2
  -1  -9   5 1287.73 305.466   2
  -1  -9   4 7519.33 840.123   3
  -1  -9   4 7810.92 963.056   1
  -1  -9   4 8326.16 788.567   2
  -1  -9   3 1222.21 379.657   1
  -1  -9   3 974.729 277.895   3
  -1  -9   3 890.698 271.277   2
  -1  -9   2 392.729 227.806   3
  -1  -9   2 463.227 295.669   1
  -1  -9   2 758.468 270.460   2
  -1  -9   1 256.719 176.249   3
  -1  -9   1 71.4543 183.546   2
  -1  -9   1 177.790 188.331   1
   1   9   0 2423.56 520.489   3
  -1  -9   0 2000.15 471.328   3
  -1  -9   0 2701.52 467.730   2
   1   9   0 2118.62 467.956   1
  -1  -9   0 2195.89 527.507   1
  -1  -9  -1 4489.87 698.489   3
   1   9   1 4061.64 652.636   1
  -1  -9  -1 4930.26 763.022   1
   1   9   1 4640.06 714.912   3
   1   9   2 11182.9 1109.59   1
  -1  -9  -2 12389.7 1258.37   1
  -1  -9  -2 11821.4 1162.41   3
  -1  -9  -3 358.585 130.739   1
  -1  -9  -3 561.873 294.367   3
   1   9   3 238.189 241.076   1
   1   9   4 4147.06 699.771   1
  -1  -9  -4 4585.76 765.121   1
   1   9   5 224.144 175.391   1
   1   9   6 15762.8 1480.55   1
   1   9   7 13746.2 1456.05   1
   1   9   8 12979.0 1428.27   1
   1   9   9 3021.34 706.065   1
   1   9  10-273.134 345.773   1
   1   9  11 395.997 357.204   1
   1   9  12 5226.09 1072.27   1
   1   9  13 3028.67 843.166   1
   1   9  14 767.144 443.880   1
   1   9  15 1624.16 559.749   1
  -1 -10  20 628.819 419.838   2
  -1 -10  19 3607.54 867.970   2
  -1 -10  18 762.455 419.112   2
  -1 -10  17 1600.07 558.841   2
   1  10 -17 2740.09 566.055   3
   1  10 -16 669.301 264.033   3
  -1 -10  16 979.502 425.149   2
  -1 -10  15 609.808 348.465   2
   1  10 -15 616.076 234.993   3
   1  10 -14 1526.74 401.475   3
  -1 -10  14 1143.42 384.073   2
   1  10 -13 326.642 188.843   3
  -1 -10  13 286.081 249.216   2
   1  10 -12 1709.76 389.518   3
  -1 -10  12 988.649 327.882   2
   1  10 -11 6685.14 816.788   3
   1  10 -11 7053.41 871.726   2
  -1 -10  11 5340.08 794.032   2
  -1 -10  10 1040.94 331.219   3
  -1 -10  10 1620.36 446.527   2
   1  10 -10 1139.46 341.026   2
  -1 -10   9 80.8075 126.769   2
  -1 -10   9 47.6886 128.740   3
   1  10  -9-30.5798 87.4010   2
   1  10  -8-5.04054 103.046   2
  -1 -10   8-20.8074 136.873   3
  -1 -10   7 156.496 167.384   2
   1  10  -7 39.3535 70.9916   2
  -1 -10   7-69.3930 120.100   3
  -1 -10   6 5448.41 668.632   2
   1  10  -6 4960.30 609.211   2
  -1 -10   6 4240.37 666.563   3
  -1 -10   5 6786.92 823.074   3
  -1 -10   5 6234.06 696.496   2
  -1 -10   5 6419.89 931.695   1
  -1 -10   4 8048.90 929.162   3
  -1 -10   4 9435.03 1098.49   1
  -1 -10   4 9208.51 842.022   2
  -1 -10   3 24034.6 1625.12   3
   1  10  -3 24615.9 1547.71   3
  -1 -10   3 27195.7 1894.25   1
  -1 -10   3 27897.4 1477.39   2
  -1 -10   2 16024.0 1388.58   3
  -1 -10   2 17184.5 1181.54   2
  -1 -10   2 18487.5 1555.30   1
   1  10  -2 14681.0 1216.05   3
   1  10  -1 11845.1 1122.53   3
  -1 -10   1 13329.1 1352.24   1
  -1 -10   1 13146.3 1083.53   2
  -1 -10   1 12440.3 1239.25   3
  -1 -10   0 1538.18 446.716   3
  -1 -10   0 1975.34 401.863   2
  -1 -10   0 1662.39 495.312   1
   1  10   0 1876.28 516.921   3
  -1 -10  -1 11937.9 1308.83   1
   1  10   1 9450.24 1040.13   1
   1  10   1 10805.2 1158.96   3
  -1 -10  -1 10113.8 1113.77   3
  -1 -10  -2 18863.3 1613.90   1
  -1 -10  -2 16243.1 1446.33   3
   1  10   2 14693.5 1330.85   1
   1  10   3 4800.48 789.722   1
   1  10   4 8611.18 1075.98   1
   1  10   5 5347.44 851.831   1
   1  10   6 198.346 241.391   1
   1  10   7 664.760 357.291   1
   1  10   8 13811.0 1558.12   1
   1  10   9 1929.25 553.253   1
   1  10  10 313.112 255.782   1
   1  10  11 555.927 375.479   1
   1  10  12 756.243 456.783   1
   1  10  13 937.984 562.607   1
   1  10  14 4989.30 1092.28   1
  -1 -11  20 124.048 183.417   2
  -1 -11  19 1512.38 559.361   2
  -1 -11  18 4401.44 917.747   2
  -1 -11  17 1654.54 524.313   2
  -1 -11  16 1102.32 437.710   2
   1  11 -16 854.294 342.199   3
   1  11 -15 2400.21 546.040   3
  -1 -11  15 1744.08 568.879   2
   1  11 -14 905.556 357.563   3
  -1 -11  14 492.059 264.574   2
  -1 -11  13 1768.91 499.119   2
   1  11 -13 1666.24 436.493   3
   1  11 -12 4377.22 701.925   3
  -1 -11  12 3352.26 651.584   2
   1  11 -11 2218.24 473.240   3
  -1 -11  11 1837.82 485.808   2
   1  11 -11 2411.63 516.831   2
  -1 -11  11 1540.79 422.169   3
  -1 -11  10 797.987 319.957   3
   1  11 -10 1190.89 346.064   3
  -1 -11  10 1198.23 378.967   2
   1  11 -10 1150.80 352.022   2
  -1 -11   9 125.891 181.456   3
   1  11  -9-20.6073 88.7260   2
  -1 -11   9-160.292 203.951   2
   1  11  -9 219.455 257.723   3
  -1 -11   8 7809.28 944.659   3
   1  11  -8 9160.20 905.040   2
   1  11  -8 9483.14 943.825   3
  -1 -11   8 9709.85 1007.72   2
   1  11  -7 865.264 269.204   2
   1  11  -7 672.756 289.346   3
  -1 -11   7 529.075 242.131   3
  -1 -11   7 318.851 149.417   2
   1  11  -6 7243.29 816.534   3
  -1 -11   6 6311.55 846.085   3
  -1 -11   6 8094.02 837.108   2
  -1 -11   5 2996.04 594.898   3
   1  11  -5 3014.25 530.963   3
  -1 -11   5 3494.97 533.492   2
  -1 -11   4 1369.89 318.790   2
  -1 -11   4 1165.85 373.364   3
  -1 -11   4 1281.82 372.014   1
   1  11  -4 943.264 363.359   3
   1  11  -3 2606.81 692.928   3
  -1 -11   3 2128.78 519.093   3
  -1 -11   3 2511.82 471.562   2
  -1 -11   3 2089.40 620.353   1
   1  11  -2 13818.4 1249.98   3
  -1 -11   2 13865.7 1366.62   3
  -1 -11   2 16337.0 1542.18   1
  -1 -11   2 16351.3 1206.94   2
   1  11  -1 25468.5 1762.22   3
  -1 -11   1 27843.1 1648.41   2
  -1 -11   1 26811.8 1939.44   3
   1  11   0 1831.55 557.552   3
  -1 -11   0 2148.02 543.383   3
  -1 -11   0 1974.21 437.743   2
   1  11   1 7469.74 970.472   1
   1  11   1 7020.71 975.879   3
   1  11   2 1547.44 457.452   1
   1  11   3 119.699 168.897   1
   1  11   4 848.268 337.167   1
   1  11   5 956.465 320.808   1
   1  11   6 3435.67 753.589   1
   1  11   7 4099.99 808.581   1
   1  11   8-428.344 346.191   1
   1  11   9 3306.51 815.320   1
   1  11  10 3775.03 899.104   1
   1  11  11-318.122 361.551   1
   1  11  12 12.8618 173.267   1
   1  11  13 667.659 643.369   1
  -1 -12  20-463.184 376.382   2
  -1 -12  19 733.299 444.281   2
  -1 -12  18 1541.89 627.369   2
  -1 -12  17-203.606 184.412   2
   1  12 -16 289.691 257.585   3
  -1 -12  16 152.359 183.320   2
   1  12 -15 1894.09 487.094   3
  -1 -12  15 1757.87 546.825   2
   1  12 -14 3211.59 626.738   3
  -1 -12  14 1828.27 515.001   2
  -1 -12  13 1428.56 439.678   2
   1  12 -13 1162.67 347.632   3
   1  12 -12 106.474 155.863   3
  -1 -12  12 66.9223 136.505   2
  -1 -12  11 76.4161 128.715   2
  -1 -12  11-71.4501 101.151   3
   1  12 -11-116.118 176.124   3
  -1 -12  10-99.0465 115.967   3
  -1 -12  10 98.1285 163.568   2
   1  12 -10 41.8887 102.454   3
   1  12 -10 89.7578 77.3629   2
  -1 -12   9 734.612 347.616   3
  -1 -12   9 1243.39 380.508   2
   1  12  -9 1465.59 424.342   3
   1  12  -9 1699.35 432.304   2
  -1 -12   8 2251.59 550.395   3
   1  12  -8 2727.23 549.640   3
  -1 -12   8 2744.80 533.539   2
   1  12  -8 3062.85 540.213   2
  -1 -12   7 15236.3 1237.79   2
   1  12  -7 14370.2 1110.39   2
   1  12  -7 13418.3 1185.39   3
  -1 -12   6 4328.13 617.186   2
   1  12  -6 4370.45 657.822   3
  -1 -12   6 3288.76 648.004   3
   1  12  -5 544.775 758.018   3
  -1 -12   5 553.770 300.988   3
  -1 -12   5 81.8055 174.868   2
   1  12  -4 38275.7 2127.23   3
  -1 -12   4 37618.3 2287.73   3
  -1 -12   4 43279.2 2035.49   2
  -1 -12   3 20731.6 1704.28   3
  -1 -12   3 23276.4 1475.05   2
   1  12  -3 18003.7 1476.30   3
   1  12  -2 1071.18 692.539   3
  -1 -12   2 57.7929 156.540   2
   1  12  -1 28991.8 1988.03   3
  -1 -12   1 32175.5 1852.09   2
   1  12   0 3493.23 683.333   3
  -1 -12   0 3034.79 566.328   2
  -1 -12  -1 2730.16 567.152   2
   1  12   1 2153.80 527.097   3
   1  12   1 2594.90 604.801   1
   1  12   2 3503.26 703.180   1
   1  12   3 2200.78 641.306   1
   1  12   4 22077.8 1864.17   1
   1  12   5 531.852 370.909   1
   1  12   6-205.001 296.439   1
   1  12   7 451.898 280.693   1
   1  12   8 561.810 280.688   1
   1  12   9 4916.57 1008.45   1
   1  12  10 1009.62 510.244   1
   1  12  11 4672.84 1044.62   1
   1  12  12 1208.67 575.907   1
  -1 -13  19 1008.33 452.336   2
  -1 -13  18 2028.29 644.309   2
  -1 -13  17 74.1772 112.909   2
  -1 -13  16 324.994 285.027   2
   1  13 -15 320.348 225.127   3
  -1 -13  15-140.662 244.517   2
   1  13 -14-203.984 191.968   3
  -1 -13  14-262.792 253.225   2
   1  13 -13 545.725 286.647   3
  -1 -13  13 297.127 154.532   2
  -1 -13  12 865.147 328.301   2
   1  13 -12 808.438 318.949   3
   1  13 -11-84.0411 101.147   3
  -1 -13  11 72.3659 184.810   2
  -1 -13  10 2592.36 583.396   2
   1  13 -10 3470.74 639.163   3
   1  13 -10 3192.45 574.960   2
  -1 -13   9 4127.22 715.033   2
   1  13  -9 4161.94 634.695   2
   1  13  -9 4613.96 724.102   3
  -1 -13   8 287.540 228.970   2
   1  13  -8 340.520 183.684   3
  -1 -13   7 12.1381 119.217   2
   1  13  -7 5.34721 137.736   3
  -1 -13   6 922.298 288.798   2
   1  13  -6 1834.94 502.656   3
   1  13  -5 9562.09 1078.22   3
  -1 -13   5 8108.22 886.598   2
  -1 -13   4 621.109 235.077   2
   1  13  -4 1183.81 419.389   3
   1  13  -3 1691.61 610.462   3
  -1 -13   3 831.809 335.749   2
   1  13  -2 4302.37 797.399   3
  -1 -13   2 3773.23 633.196   2
   1  13  -1 644.643 234.094   3
  -1 -13   1 603.910 267.165   2
  -1 -13   0-29.2742 162.765   2
   1  13   0-237.307 330.548   3
  -1 -13  -1 2751.28 601.675   2
  -1 -13  -2 758.922 351.218   2
   1  13   2 1146.67 435.058   1
   1  13   3 679.023 445.601   1
   1  13   4 25743.3 2055.06   1
   1  13   5 7332.10 1144.92   1
   1  13   6 629.957 304.079   1
   1  13   7 680.472 370.789   1
   1  13   8 3360.17 838.614   1
   1  13   9-135.362 180.442   1
   1  13  10 1971.71 698.454   1
   1  13  11 4252.30 970.780   1
  -1 -14  17-103.715 314.889   2
  -1 -14  16 1316.24 466.384   2
  -1 -14  15 972.817 422.179   2
   1  14 -14 402.440 200.043   3
  -1 -14  14 311.479 196.785   2
  -1 -14  13 41.2068 93.2926   2
   1  14 -13 753.264 326.628   3
  -1 -14  12 61.9082 112.141   2
   1  14 -12 20.1051 113.517   3
   1  14 -11 403.683 247.426   3
  -1 -14  11 255.793 150.211   2
   1  14 -10 1925.47 512.942   3
  -1 -14  10 2092.30 536.622   2
  -1 -14   9 2440.85 539.127   2
   1  14  -9 3639.00 676.714   3
  -1 -14   8 4213.43 709.886   2
   1  14  -8 5228.87 830.719   3
   1  14  -7 1081.54 529.318   3
  -1 -14   7 741.497 313.601   2
   1  14  -6 9041.97 1131.08   3
  -1 -14   6 7135.54 860.687   2
  -1 -14   5 949.869 290.858   2
   1  14  -5 1295.02 439.920   3
  -1 -14   4 592.985 269.529   2
   1  14  -4 1140.40 442.041   3
  -1 -14   3 2726.27 545.234   2
   1  14  -3 4151.65 819.627   3
  -1 -14   2 3869.98 702.167   2
   1  14  -2 6359.43 1043.15   3
   1  14  -1 9596.06 1231.39   3
  -1 -14   1 8298.35 992.706   2
   1  14   0 8690.83 1328.94   3
  -1 -14   0 5756.74 923.003   2
  -1 -14  -1 19661.0 1624.20   2
   1  14   2 2022.59 613.268   1
  -1 -14  -2 946.259 384.947   2
   1  14   3 1997.83 624.384   1
   1  14   4 749.823 418.443   1
   1  14   5 3176.24 788.456   1
   1  14   6 2631.10 764.812   1
   1  14   7 1410.78 551.002   1
   1  14   8 9195.29 1410.79   1
   1  14   9 2147.99 667.290   1
   1  14  10 1513.66 642.009   1
   1  15 -14 273.732 282.164   3
  -1 -15  14-285.694 280.585   2
  -1 -15  13 386.302 246.200   2
   1  15 -13 292.716 236.778   3
   1  15 -12 30.1231 93.9074   3
  -1 -15  12-325.400 268.553   2
  -1 -15  11-29.9106 172.949   2
   1  15 -11 384.529 249.097   3
  -1 -15  10 850.857 381.456   2
   1  15 -10 184.232 199.936   3
   1  15  -9 1829.32 522.122   3
  -1 -15   9 1587.47 480.589   2
  -1 -15   8 981.994 369.901   2
   1  15  -8 667.773 383.545   3
  -1 -15   7 6706.72 903.026   2
   1  15  -7 8329.25 1106.80   3
   1  15  -6 4583.05 898.038   3
  -1 -15   6 3825.50 658.656   2
  -1 -15   5 4929.21 735.694   2
   1  15  -5 5865.17 916.349   3
  -1 -15   4 1693.88 423.846   2
   1  15  -4 2288.17 674.302   3
  -1 -15   3 1594.04 484.878   2
   1  15  -3 3395.82 735.747   3
   1  15  -2 5598.41 1015.20   3
  -1 -15   2 4714.51 740.945   2
   1  15  -1 3782.37 840.185   3
  -1 -15   1 2756.98 606.046   2
   1  15   0 12003.3 1473.85   3
  -1 -15   0 8336.00 1091.15   2
  -1 -15  -1 10843.3 1272.23   2
  -1 -15  -2-108.947 183.934   2
   1  15   3 694.585 344.035   1
  -1 -15  -3 821.989 300.110   2
   1  15   4 601.627 379.490   1
   1  15   5 281.703 274.923   1
   1  15   6 907.640 450.467   1
   1  15   7 2878.36 769.811   1
   1  15   8 4721.82 1046.65   1
   1  15   9 957.916 473.028   1
   1  16 -13 569.139 255.822   3
   1  16 -12 3444.89 697.805   3
   1  16 -11 1194.14 392.665   3
  -1 -16  10 668.043 284.027   2
   1  16 -10 44.5568 198.817   3
   1  16  -9 667.179 292.802   3
  -1 -16   9 542.551 249.358   2
   1  16  -8 323.092 149.989   3
  -1 -16   8 521.657 267.330   2
   1  16  -7 67.0131 201.617   3
  -1 -16   7 234.150 134.477   2
  -1 -16   6-42.9805 86.0895   2
   1  16  -6-242.734 310.052   3
  -1 -16   5 526.479 280.356   2
   1  16  -5 1268.46 520.908   3
  -1 -16   4 2106.44 497.223   2
   1  16  -4 3273.57 743.152   3
  -1 -16   3 241.964 171.529   2
   1  16  -3 490.524 366.630   3
   1  16  -2 1431.42 502.832   3
  -1 -16   2 1235.56 384.989   2
   1  16  -1-33.7304 249.185   3
  -1 -16   1 290.392 152.050   2
  -1 -16   0 396.225 294.672   2
  -1 -16  -1 700.499 347.684   2
  -1 -16  -2 3193.43 739.691   2
  -1 -16  -3-74.7645 144.119   2
   1  16   4 328.900 373.810   1
  -1 -16  -4 682.198 391.421   2
   1  16   5 3734.62 929.192   1
   1  16   6 835.267 414.018   1
   1  16   7 3597.86 935.820   1
   1  17 -12 47.2234 206.331   3
   1  17 -11-161.136 236.940   3
   1  17 -10 2406.12 600.339   3
   1  17  -9 550.911 309.612   3
   1  17  -8 2931.34 703.527   3
   1  17  -7 228.631 210.734   3
   1  17  -6 694.203 313.326   3
   1  17  -5 208.818 208.493   3
   1  17  -4 472.698 317.645   3
  -1 -17   4-237.305 192.621   2
  -1 -17   3 1891.54 521.492   2
   1  17  -3 1930.00 628.591   3
   1  17  -2 3211.91 784.752   3
  -1 -17   2 3059.28 632.590   2
   1  17  -1 3843.13 895.014   3
  -1 -17   1 2460.24 674.358   2
  -1 -17   0 7222.52 1056.82   2
  -1 -17  -1 98.6410 105.393   2
  -1 -17  -2 181.313 256.788   2
  -1 -17  -3 3452.56 782.991   2
  -1 -17  -4 2382.89 733.581   2
   1  17   5 3576.76 943.677   1
  -1 -17  -5 5170.91 1046.40   2
   1  18 -11-125.242 241.634   3
   1  18 -10 284.363 320.223   3
   1  18  -9 2192.96 616.159   3
   1  18  -8 1740.72 538.894   3
   1  18  -7 1348.64 491.683   3
   1  18  -6 493.660 383.536   3
   1  18  -5 1265.90 501.001   3
   1  18  -4 543.675 385.219   3
   1  18  -3 25.9295 285.829   3
   1  18  -2-211.970 261.054   3
   1  19 -10 648.684 344.707   3
   1  19  -9 13.5578 179.899   3
   1  19  -8 172.448 333.686   3
   1  19  -7 1215.25 510.264   3
   1  19  -6 537.709 378.880   3
   1  19  -5 791.863 402.616   3
   1  19  -4-50.9670 141.533   3
   1  19  -3 168.006 229.007   3
   1  20  -8 2783.10 769.956   3
   1  20  -7 1002.16 488.040   3
   1  20  -6 751.947 469.530   3
   1  20  -5 280.325 278.985   3
   1  20  -4 627.454 364.091   3
  -2  20  -2 746.664 471.554   3
  -2  20  -3 310.883 154.370   3
  -2  20  -4-9.16757 334.230   3
  -2  20  -5 241.550 189.371   3
  -2  20  -6 934.693 517.292   3
  -2  20  -7 1056.98 455.343   3
  -2  20  -8-291.125 229.258   3
  -2  19   8 2623.25 781.336   1
  -2  19   7-38.2086 224.014   1
  -2  19   6 580.265 417.817   1
  -2  19   3 880.171 542.114   3
  -2  19   2 790.382 517.083   3
  -2  19   1 995.001 534.506   3
  -2  19   0 1695.61 562.736   3
  -2  19  -1 1366.74 542.025   3
  -2  19  -2 561.716 300.662   3
  -2  19  -3 80.7413 179.453   3
  -2  19  -4 146.073 140.452   3
  -2  19  -5 218.027 283.927   3
  -2  19  -6 1177.77 490.916   3
  -2  19  -7 318.331 357.723   3
  -2  19  -8 342.241 303.989   3
  -2  19  -9 1264.07 501.110   3
  -2  19 -10 503.691 359.141   3
  -2  19 -11 1721.05 617.235   3
  -2  19 -12 380.470 168.015   3
  -2  18   9-74.4275 129.713   1
  -2  18   8 765.359 455.676   1
  -2  18   7 224.260 233.689   1
  -2  18   6 4150.44 958.512   1
  -2  18   5 5321.80 998.033   1
  -2  18   5 5720.01 1198.63   3
  -2  18   4 2692.83 808.163   3
  -2  18   3 845.625 433.015   3
  -2  18   2 99.4716 211.371   3
  -2  18   1 594.351 395.347   3
  -2  18   0 288.094 159.488   3
  -2  18  -1 2914.62 729.003   3
  -2  18  -2 1765.74 606.626   3
  -2  18  -3 717.673 419.837   3
  -2  18  -4 18.0446 169.503   3
  -2  18  -5 119.475 149.506   3
  -2  18  -6 2650.09 716.199   3
  -2  18  -7 1341.96 502.904   3
  -2  18  -8 698.714 397.010   3
  -2  18  -9-180.749 278.484   3
  -2  18 -10 1380.67 512.394   3
  -2  18 -11 1333.73 525.841   3
  -2  18 -12 348.784 281.731   3
  -2  18 -13 264.746 138.175   3
  -2  18 -14 175.954 275.657   3
  -2  17  10 68.8807 165.462   1
  -2  17   9 33.0800 169.948   1
  -2  17   8 261.103 237.747   1
  -2  17   7 414.574 275.245   1
  -2  17   6 522.893 403.930   1
  -2  17   6 714.389 337.893   3
  -2  17   5 576.744 378.530   3
  -2  17   5 182.468 201.893   1
  -2  17   4 4115.50 946.121   3
  -2  17   4 3427.80 802.868   1
  -2  17   3 4029.01 948.312   3
  -2  17   2 7864.82 1218.54   3
  -2  17   1 3918.52 910.972   3
  -2  17   0 341.910 334.270   3
  -2  17  -1-49.6697 316.562   3
  -2  17  -2 415.322 280.079   3
  -2  17  -3 276.797 282.705   3
  -2  17  -4 2068.76 551.819   3
  -2  17  -5 1307.19 480.054   3
  -2  17  -6 14163.3 1575.97   3
  -2  17  -7 2579.52 691.383   3
  -2  17  -8 353.762 373.024   3
  -2  17  -9 2378.85 670.680   3
  -2  17 -10 209.725 182.152   3
  -2  17 -11-207.844 174.528   3
  -2  17 -12 454.764 317.650   3
  -2  17 -13 1375.81 561.928   3
  -2  17 -14 451.033 171.594   3
  -2  17 -15-101.411 238.083   3
  -2  16  11 288.616 376.935   1
  -2  16  10 1702.40 626.660   1
  -2  16   9 1070.23 478.418   1
  -2  16   8-127.372 280.262   1
  -2  16   7 6865.70 1086.19   1
  -2  16   6 220.505 273.117   1
  -2  16   6 978.928 495.916   3
  -2  16   5 715.608 431.258   3
  -2  16   5 1146.03 482.391   1
  -2  16   4 703.519 388.703   3
  -2  16   4 704.390 308.861   1
  -2  16   3 196.044 289.652   3
  -2  16   2 1973.74 592.217   3
  -2  16   1 1550.61 604.147   3
  -2  16   0 1449.09 547.191   3
  -2  16  -1 11645.6 1392.47   3
  -2  16  -2 4480.10 880.081   3
  -2  16  -3 256.081 167.319   3
  -2  16  -4-61.4600 250.618   3
  -2  16  -5 1812.41 595.019   3
  -2  16  -6 626.236 265.243   3
  -2  16  -7 4532.39 888.692   3
  -2  16  -8 2465.97 680.793   3
  -2  16  -9 1971.23 590.413   3
  -2  16 -10 255.948 265.350   3
  -2  16 -11-80.6347 227.341   3
  -2  16 -12 35.5011 190.461   3
  -2  16 -13 493.432 318.307   3
  -2  16 -14 70.0824 200.078   3
  -2  16 -15 2292.93 685.255   3
  -2  16 -16 1746.70 650.120   3
  -2  15  13 559.928 439.531   1
  -2  15  12 556.436 389.129   1
  -2  15  11-10.8345 147.094   1
  -2  15  10 22.8990 155.933   1
  -2  15   9 6.41175 250.635   1
  -2  15   8-19.7005 180.745   1
  -2  15   7 3357.05 767.441   1
  -2  15   6 529.722 472.024   3
  -2  15   6 484.847 324.684   1
  -2  15   5 1224.25 485.787   3
  -2  15   5 855.008 433.697   1
  -2  15   4 1441.13 446.357   1
  -2  15   4 1891.67 630.768   3
  -2  15   3 604.964 289.000   1
  -2  15   3 597.850 288.407   3
   2 -15  -2 57.7876 91.9017   2
   2 -15  -2 280.088 143.813   2
  -2  15   2 182.993 222.720   3
  -2  15   1 5358.45 936.536   3
   2 -15  -1 6149.00 506.991   2
   2 -15  -1 5311.86 490.612   2
   2 -15   0 746.028 162.954   2
   2 -15   0 449.776 162.406   2
   2 -15   1 3079.21 673.032   1
  -2  15  -1 2310.44 577.240   3
  -2  15  -2 1757.83 591.169   3
   2 -15   2 2167.38 613.175   1
   2 -15   3 4855.20 908.094   1
  -2  15  -3 3946.61 777.750   3
  -2  15  -4 2866.45 655.162   3
   2 -15   4 3125.40 745.602   1
   2 -15   5 11194.9 1308.36   1
  -2  15  -5 8744.18 1188.32   3
  -2  15  -6 788.375 480.834   3
  -2  15  -7 1445.85 565.076   3
  -2  15  -8-131.479 334.807   3
  -2  15  -9 3213.04 724.397   3
  -2  15 -10 1513.90 497.885   3
  -2  15 -11-34.5010 333.690   3
  -2  15 -12 2351.31 684.393   3
  -2  15 -13 4087.08 878.915   3
  -2  15 -14 604.278 312.262   3
  -2  15 -15 2121.05 658.859   3
  -2  15 -16 1098.40 507.691   3
  -2  15 -17 517.100 373.282   3
  -2  14  13-226.074 244.143   1
  -2  14  12-1326.54 549.891   1
  -2  14  11 748.570 403.991   1
  -2  14  10 1809.91 645.456   1
  -2  14   9 530.430 347.244   1
  -2  14   8 968.538 395.402   1
  -2  14   7-423.019 301.212   1
  -2  14   7 65.2119 203.710   3
  -2  14   6 459.993 365.560   3
   2 -14  -6 379.731 110.122   2
  -2  14   6-2.50855 166.274   1
  -2  14   5 2850.93 674.555   1
  -2  14   5 3472.74 786.507   3
   2 -14  -4 114.754 154.951   2
  -2  14   4 197.867 190.589   1
  -2  14   4 92.1562 239.544   3
   2 -14  -3 4443.93 570.002   2
  -2  14   3 6564.18 993.354   3
  -2  14   3 5744.34 852.513   1
  -2  14   2 4291.72 870.321   3
  -2  14   2 3908.53 729.191   1
   2 -14  -2 3253.79 429.822   2
   2 -14  -2 3670.47 743.556   1
   2 -14  -2 1911.84 334.558   2
   2 -14  -1 3469.56 396.415   2
   2 -14  -1 5453.58 474.985   2
  -2  14   1 4823.40 859.105   3
   2 -14  -1 5384.93 876.621   1
   2 -14   0 8929.11 1129.63   1
   2 -14   0 6556.45 428.036   2
   2 -14   0 8401.01 483.266   2
  -2  14   0 9887.03 1216.58   3
   2 -14   1 8383.02 1091.65   1
  -2  14  -1 9425.59 1211.02   3
   2 -14   2 6503.09 1011.43   1
  -2  14  -2 6408.10 919.685   3
  -2  14  -3 23786.8 1815.24   3
   2 -14   3 21075.4 1751.20   1
   2 -14   4 29003.5 1979.14   1
  -2  14  -4 31687.7 2147.44   3
  -2  14  -5 13502.9 1458.49   3
   2 -14   5 16193.0 1481.04   1
  -2  14  -6 1632.18 587.041   3
   2 -14   6 2572.60 621.381   1
   2 -14   7 1345.86 376.354   1
  -2  14  -7 1767.86 526.123   3
  -2  14  -8 8813.25 1188.26   3
  -2  14  -9 11.5648 236.909   3
  -2  14 -10 1566.01 473.451   3
  -2  14 -11 725.964 436.964   3
  -2  14 -12 6834.83 1101.44   3
  -2  14 -13 274.184 324.762   3
  -2  14 -14-38.8169 143.108   3
  -2  14 -15 4045.07 900.730   3
  -2  14 -16 3331.30 849.015   3
  -2  14 -17 1298.36 661.542   3
  -2  14 -18 971.852 476.259   3
  -2  13  14 154.722 217.428   1
  -2  13  13 393.787 272.179   1
  -2  13  12 2002.69 785.594   1
  -2  13  11 193.934 215.933   1
  -2  13  10 5272.28 991.988   1
  -2  13   9-4.47806 260.552   1
  -2  13   8 2652.49 731.251   1
   2 -13  -7 637.986 277.692   2
  -2  13   7 688.212 408.783   3
  -2  13   7 371.307 244.231   1
  -2  13   6 149.277 183.321   3
  -2  13   6 115.672 173.367   1
  -2  13   5 69.2864 183.751   1
  -2  13   5 72.5854 248.527   3
   2 -13  -4 2598.04 465.715   2
  -2  13   4 3417.06 714.954   3
  -2  13   4 2874.84 573.260   1
   2 -13  -4 3461.58 708.751   1
  -2  13   3 765.141 408.685   3
  -2  13   3 457.798 267.388   1
   2 -13  -3 404.781 230.315   1
   2 -13  -3 278.226 140.263   2
  -2  13   2 382.152 223.941   1
   2 -13  -2 461.293 278.972   1
  -2  13   2 299.530 229.505   3
   2 -13  -2 183.227 74.7124   2
   2 -13  -1 1464.66 240.808   2
   2 -13  -1 1221.12 220.911   2
  -2  13   1 1258.20 424.694   3
   2 -13  -1 704.618 283.624   1
   2 -13   0 38668.2 2198.12   1
  -2  13   0 41220.4 2330.26   3
   2 -13   0 31859.4 907.655   2
   2 -13   0 33511.6 891.253   2
  -2  13  -1 24898.3 1905.28   3
   2 -13   1 17948.6 1611.50   1
  -2  13  -2 7979.76 1142.85   3
   2 -13   2 7996.58 1070.67   1
  -2  13  -3 7335.98 1014.90   3
   2 -13   3 4103.69 812.295   1
  -2  13  -4 18776.3 1587.84   3
   2 -13   4 16100.8 1400.09   1
   2 -13   5 27083.5 1810.67   1
  -2  13  -5 32333.7 2174.32   3
  -2  13  -6 3364.67 849.133   3
   2 -13   6 3655.10 697.967   1
  -2  13  -7 16553.3 763.071   2
  -2  13  -7 15104.2 1468.09   3
  -2  13  -8 7801.05 609.038   2
  -2  13  -8 7692.56 1076.18   3
  -2  13  -9 531.555 300.221   3
  -2  13  -9 471.352 176.347   2
  -2  13 -10 8637.95 1180.88   3
  -2  13 -11 682.471 347.465   3
  -2  13 -12 161.582 278.162   3
  -2  13 -13-84.1833 159.741   3
  -2  13 -14 120.135 190.036   3
  -2  13 -15 2372.74 664.341   3
  -2  13 -16 1163.99 486.564   3
  -2  13 -17 4093.45 931.405   3
  -2  13 -18 172.567 247.582   3
  -2  12  15 823.488 497.983   1
  -2  12  14 2904.96 888.216   1
  -2  12  13 7322.30 1255.31   1
  -2  12  12 986.394 570.493   1
  -2  12  11 167.910 282.094   1
  -2  12  10 3720.21 801.395   1
  -2  12   9 635.159 397.695   1
   2 -12  -8 66.2334 152.837   2
  -2  12   8 37.9431 165.434   1
   2 -12  -7-3.15101 173.096   2
  -2  12   7 638.647 324.555   1
  -2  12   7 287.660 222.755   3
  -2  12   6 10000.6 1274.13   3
  -2  12   6 9351.97 1079.33   1
  -2  12   5 8765.18 1052.17   1
  -2  12   5 10067.4 1249.47   3
   2 -12  -5 8171.89 1071.27   1
  -2  12   4 2586.52 593.190   3
   2 -12  -4 1964.76 402.526   2
  -2  12   4 2424.78 572.277   1
   2 -12  -4 1766.42 496.629   1
  -2  12   3 1828.88 577.508   3
  -2  12   3 1905.10 460.811   1
   2 -12  -3 1635.94 329.177   2
   2 -12  -3 1664.76 468.266   1
   2 -12  -2 6320.94 564.364   2
   2 -12  -2 7073.20 891.492   1
  -2  12   2 7221.34 853.961   1
  -2  12   2 8297.47 1022.55   3
   2 -12  -1 1746.88 260.336   2
   2 -12  -1 2367.48 289.443   2
   2 -12   0 514.958 108.079   2
   2 -12   0 578.583 112.712   2
  -2  12  -1 6843.13 932.831   3
  -2  12  -2 1670.00 534.683   3
  -2  12  -3 3249.12 688.967   3
  -2  12  -4 4805.11 786.419   3
  -2  12  -5 35870.3 2159.38   3
  -2  12  -6 17333.4 720.389   2
  -2  12  -6 18482.3 1586.90   3
  -2  12  -7 1391.78 479.875   3
  -2  12  -7 1229.63 238.610   2
  -2  12  -8 374.475 270.096   3
  -2  12  -8 105.766 81.9915   2
  -2  12  -9 426.941 150.401   2
  -2  12  -9 394.624 313.570   3
  -2  12 -10-120.428 127.822   2
  -2  12 -10 135.100 176.186   3
  -2  12 -11 2102.55 408.805   2
  -2  12 -11 1594.49 430.433   3
  -2  12 -12 7997.25 1141.62   3
  -2  12 -13-30.7638 126.788   3
  -2  12 -14 2977.59 713.679   3
  -2  12 -15 233.026 183.269   3
  -2  12 -16 55.4926 280.766   3
  -2  12 -17 299.430 286.368   3
  -2  12 -18-195.657 356.889   3
   2 -12  18-295.696 390.749   1
  -2  12 -19 722.541 303.929   3
   2 -12  19 2378.36 893.962   1
  -2  11  16 62.0612 314.033   1
  -2  11  15 3913.39 999.189   1
  -2  11  14 38.1995 135.356   1
  -2  11  13 4260.83 961.302   1
  -2  11  12 991.068 479.298   1
  -2  11  11 6032.20 1015.94   1
  -2  11  10 653.343 331.622   1
  -2  11   9 4782.41 878.649   1
   2 -11  -9 4624.67 799.953   2
  -2  11   8 856.127 368.695   1
   2 -11  -8 897.654 354.931   2
  -2  11   7 6908.23 1016.14   3
   2 -11  -7 3988.37 683.298   2
  -2  11   7 6005.85 874.835   1
  -2  11   6 36574.7 2347.50   3
  -2  11   6 35017.7 2064.72   1
   2 -11  -5-6.78606 108.339   1
  -2  11   5 703.726 393.584   1
  -2  11   5 886.110 408.858   3
   2 -11  -5 110.325 126.544   2
  -2  11   4 1569.74 500.032   3
   2 -11  -4 1776.31 449.665   1
   2 -11  -4 1228.05 306.041   2
  -2  11   4 1724.06 429.547   1
  -2  11   3 6691.77 779.703   1
   2 -11  -3 7279.28 662.082   2
  -2  11   3 6951.65 917.270   3
  -2  11   2 1354.65 514.083   3
  -2  11   2 1184.85 392.963   1
   2 -11  -2 1503.02 283.433   2
   2 -11  -1 2053.11 533.396   3
   2 -11  -1 1362.98 221.237   2
  -2  11   1 1410.47 397.051   1
  -2  11   1 1490.75 412.267   3
   2 -11  -1 1475.22 218.670   2
   2 -11   0 12996.8 452.961   2
   2 -11   0 13221.1 464.756   2
  -2  11   0 13669.1 1231.36   3
  -2  11  -1-9.73628 106.980   3
   2 -11   1-112.583 177.007   3
   2 -11   1-24.7391 110.694   1
   2 -11   2 117.114 146.003   1
  -2  11  -2-3.78352 178.304   3
   2 -11   2 99.3331 208.220   3
  -2  11  -3 10535.7 1111.98   3
   2 -11   3 10937.5 1196.95   3
   2 -11   3 7338.20 824.707   1
  -2  11  -4 4192.90 678.619   3
   2 -11   4 4844.02 886.363   3
   2 -11   5 12618.0 1288.07   3
  -2  11  -5 13978.6 1271.64   3
  -2  11  -6 3415.33 336.455   2
  -2  11  -6 3696.97 723.305   3
  -2  11  -7 2645.00 578.217   3
  -2  11  -7 2609.99 329.055   2
  -2  11  -8 616.677 253.868   3
  -2  11  -8 986.569 247.748   2
  -2  11  -9 1579.98 452.005   3
  -2  11  -9 2265.81 384.369   2
  -2  11 -10 5332.29 862.196   3
  -2  11 -10 4141.05 553.700   2
  -2  11 -11 236.892 176.381   2
  -2  11 -11-111.261 109.174   3
  -2  11 -12 10831.9 1302.82   3
  -2  11 -12 12030.5 1067.62   2
  -2  11 -13 1796.03 488.817   3
  -2  11 -14 1641.49 531.209   3
  -2  11 -15-79.7082 230.635   3
  -2  11 -16 2482.59 706.224   3
  -2  11 -17 991.619 373.778   3
  -2  11 -18 400.229 154.262   3
   2 -11  18 539.787 353.211   1
  -2  11 -19 306.744 148.781   3
   2 -11  19 226.141 164.073   1
  -2  10  16 3201.45 834.218   1
  -2  10  15 14.2088 276.001   1
  -2  10  14 5892.20 1063.88   1
  -2  10  13 339.882 895.911   1
  -2  10  12 5112.60 925.281   1
  -2  10  11 2315.68 612.466   1
  -2  10  10 1108.46 402.318   1
  -2  10   9 5571.86 877.158   1
   2 -10  -9 6245.46 898.516   2
  -2  10   8-149.262 208.744   1
   2 -10  -8 390.631 249.877   2
  -2  10   7 1779.91 504.494   3
  -2  10   7 1477.89 496.316   1
   2 -10  -7 685.949 316.780   1
  -2  10   6 8615.56 989.680   1
  -2  10   6 10279.5 1187.62   3
   2 -10  -6 7739.59 945.212   1
  -2  10   5 12503.8 1237.34   3
   2 -10  -5 13367.8 1072.01   2
  -2  10   5 13739.6 1219.64   1
   2 -10  -5 14409.9 1429.61   3
   2 -10  -5 10311.8 1048.55   1
  -2  10   4 1006.43 388.588   3
  -2  10   4 1009.61 336.999   1
   2 -10  -4 747.468 304.372   3
   2 -10  -4 1005.42 268.854   2
  -2  10   3 8803.27 968.968   3
   2 -10  -3 10108.6 1141.92   3
   2 -10  -3 9974.08 736.781   2
  -2  10   3 8292.92 854.923   1
   2 -10  -2 5655.06 490.431   2
   2 -10  -2 4147.83 598.982   1
  -2  10   2 5664.38 698.024   1
   2 -10  -2 6455.55 879.763   3
   2 -10  -1 4798.57 768.986   3
   2 -10  -1 4160.14 335.436   2
  -2  10   1 4648.33 603.792   1
   2 -10  -1 5273.55 653.194   1
   2 -10   0-32.9969 105.193   3
   2 -10   0 134.651 153.766   1
   2 -10   1 1390.95 414.337   3
   2 -10   1 1238.68 393.639   1
   2 -10   2 22779.2 1655.05   3
   2 -10   2 29484.8 1528.72   1
   2 -10   3 586.344 245.284   3
   2 -10   3 349.632 165.794   1
  -2  10  -4-211.576 246.392   3
   2 -10   4-70.0163 196.758   1
   2 -10   4 173.496 128.546   3
   2 -10   5 8086.98 990.719   3
  -2  10  -5 9607.40 1040.76   3
  -2  10  -5 8980.65 486.120   2
   2 -10   6 20490.8 1584.70   3
  -2  10  -6 24661.3 1696.99   3
  -2  10  -6 23702.3 894.614   2
  -2  10  -7 4260.70 715.986   3
   2 -10   7 2781.57 640.611   3
  -2  10  -7 3493.69 390.968   2
  -2  10  -8 154.509 164.695   3
  -2  10  -8 126.384 111.197   2
  -2  10  -9 21065.3 1688.78   3
  -2  10  -9 19665.1 1139.45   2
  -2  10 -10 10213.0 1200.33   3
  -2  10 -10 10101.5 904.961   2
  -2  10 -11 8592.85 885.188   2
  -2  10 -11 8385.04 1121.84   3
  -2  10 -12 6287.48 814.251   2
  -2  10 -12 7122.63 1077.12   3
  -2  10 -13 4819.27 897.885   3
  -2  10 -14 140.805 206.087   3
  -2  10 -15-280.173 303.944   3
  -2  10 -16 4485.13 921.868   3
  -2  10 -17 147.806 135.761   3
   2 -10  17-238.311 155.086   1
  -2  10 -18 385.076 273.883   3
   2 -10  18 246.789 236.052   1
  -2  10 -19 9.58552 359.818   3
   2 -10  19 568.540 322.063   1
  -2  10 -20 162.581 201.953   3
  -2   9  17 241.095 295.238   1
  -2   9  16 1578.86 557.729   1
  -2   9  15-255.260 219.906   1
  -2   9  14 14197.6 1598.90   1
  -2   9  13 1282.97 493.473   1
  -2   9  12 329.540 221.200   1
  -2   9  11 608.536 250.912   1
  -2   9  10 198.492 208.437   1
   2  -9  -9 784.977 267.062   2
  -2   9   9 609.515 262.507   1
   2  -9  -8-48.4857 122.584   2
   2  -9  -8 12.6141 182.621   1
  -2   9   8-60.5643 161.169   1
   2  -9  -7 1957.55 522.001   3
  -2   9   7 1244.59 439.105   3
  -2   9   7 1460.98 420.886   1
   2  -9  -7 1025.51 350.120   1
  -2   9   6 19685.6 1410.45   1
  -2   9   6 21289.3 1644.96   3
   2  -9  -6 22221.8 1679.85   3
   2  -9  -5 220.547 216.822   3
   2  -9  -5 343.281 147.307   2
  -2   9   5 349.055 261.319   1
  -2   9   5 181.115 277.640   3
   2  -9  -4 6753.54 650.525   2
   2  -9  -4 7356.70 964.829   3
  -2   9   4 6851.93 841.432   3
  -2   9   4 6937.83 770.507   1
  -2   9   3 10589.3 1018.57   3
  -2   9   3 11482.9 939.749   1
   2  -9  -3 12478.8 1206.69   3
   2  -9  -3 11389.2 739.288   2
   2  -9  -3 12398.8 1009.91   1
   2  -9  -2 10019.9 592.834   2
  -2   9   2 10591.2 866.759   1
   2  -9  -2 12157.3 968.219   1
   2  -9  -2 12516.9 1184.17   3
   2  -9  -1 590.420 219.617   1
   2  -9  -1 761.927 310.715   3
  -2   9   1 325.187 170.080   1
   2  -9  -1 386.818 89.2191   2
   2  -9   0 8276.46 773.694   1
   2  -9   0 7173.63 882.439   3
   2  -9   1 7253.75 877.171   3
   2  -9   1 7975.00 771.007   1
   2  -9   2 15936.8 1059.89   1
   2  -9   2 13513.5 1186.28   3
   2  -9   3 25595.7 1646.85   3
   2  -9   3 28655.7 1394.84   1
  -2   9  -4 1727.94 190.244   2
   2  -9   4 1839.68 450.183   3
   2  -9   5 2945.17 549.594   3
  -2   9  -5 3492.85 611.533   3
  -2   9  -5 2831.04 284.199   2
  -2   9  -6 9897.34 1040.65   3
   2  -9   6 9111.64 1034.55   3
  -2   9  -6 10184.2 618.171   2
  -2   9  -7-66.5172 59.6292   2
   2  -9   7-23.8303 97.4235   3
  -2   9  -7-5.21165 124.308   3
  -2   9  -8 1099.09 262.086   2
  -2   9  -8 1444.38 421.411   3
  -2   9  -9 13436.2 990.526   2
  -2   9  -9 13998.9 1331.24   3
  -2   9 -10 11123.6 956.678   2
  -2   9 -10 10954.7 1201.15   3
  -2   9 -11 11865.2 1057.66   2
  -2   9 -11 11655.4 1311.97   3
  -2   9 -12 13323.2 1194.72   2
  -2   9 -12 14618.9 1481.89   3
  -2   9 -13 626.106 274.305   3
  -2   9 -14-67.7389 249.959   3
  -2   9 -15 4550.28 914.343   3
  -2   9 -16 1715.86 578.585   3
   2  -9  16 271.032 261.505   1
   2  -9  17-153.820 313.948   1
  -2   9 -17 136.461 146.828   3
  -2   9 -18 398.042 330.620   3
   2  -9  18 719.250 431.332   1
   2  -9  19 591.510 220.829   1
  -2   9 -19 1393.92 605.890   3
  -2   9 -20 399.523 376.882   3
  -2   8  18 2589.34 784.313   1
  -2   8  17 80.5037 204.593   1
  -2   8  16 617.461 385.839   1
  -2   8  15 139.565 222.963   1
  -2   8  14 716.941 376.883   1
  -2   8  13 2054.66 612.042   1
  -2   8  12 805.966 348.666   1
  -2   8  11 34832.8 2207.58   1
  -2   8  10 6222.49 890.289   1
   2  -8 -10 6106.35 908.855   2
   2  -8  -9 18526.5 1515.30   3
  -2   8   9 15426.3 1319.55   1
   2  -8  -9 19797.3 1592.31   1
   2  -8  -8 720.754 302.496   1
   2  -8  -8 855.288 344.939   3
  -2   8   8 594.682 240.466   1
   2  -8  -8 726.086 301.463   2
  -2   8   7 5173.87 707.013   1
  -2   8   7 5387.75 803.184   3
   2  -8  -7 5728.84 802.659   1
   2  -8  -7 4220.86 698.047   3
   2  -8  -6 9230.97 828.673   2
  -2   8   6 11392.1 1166.32   3
  -2   8   6 9369.40 919.782   1
   2  -8  -6 10522.0 1101.29   3
  -2   8   5 12080.7 1093.06   3
   2  -8  -5 12699.5 1190.19   3
  -2   8   5 10960.5 957.799   1
   2  -8  -5 10582.6 832.349   2
   2  -8  -4 4677.80 489.368   2
  -2   8   4 5106.66 699.109   3
   2  -8  -4 6449.38 829.827   3
   2  -8  -4 4966.39 625.601   1
  -2   8   4 5793.15 666.775   1
   2  -8  -3 5887.44 779.672   3
   2  -8  -3 4815.50 450.424   2
   2  -8  -3 5590.45 614.322   1
  -2   8   3 5348.49 633.549   1
  -2   8   2 19607.7 1078.83   1
   2  -8  -2 20552.9 1412.42   3
   2  -8  -2 20957.1 1137.00   1
   2  -8  -2 18211.8 767.008   2
   2  -8  -1 61090.8 1125.32   2
   2  -8  -1 63930.0 1883.98   1
   2  -8  -1 65029.2 2514.47   3
   2  -8   0 6097.43 581.834   1
   2  -8   0 5154.59 689.794   3
   2  -8   1 2365.21 356.949   1
   2  -8   1 2376.33 492.979   3
   2  -8   2 43969.9 2024.76   3
   2  -8   2 51924.4 1690.15   1
   2  -8   3 67597.6 1965.80   1
   2  -8   3 59604.5 2384.72   3
   2  -8   4 22943.3 1490.37   3
  -2   8  -4 21832.9 674.059   2
  -2   8  -5 2283.92 272.118   2
   2  -8   5 2288.86 495.913   3
   2  -8   6 33524.9 1890.88   3
  -2   8  -6 37270.0 1274.97   2
  -2   8  -6 38821.0 2006.74   3
  -2   8  -7 788.481 219.402   2
  -2   8  -7 882.869 324.451   3
  -2   8  -8 309.091 152.844   2
  -2   8  -8 14.1957 235.884   3
  -2   8  -9 1559.00 433.158   3
  -2   8  -9 2161.26 404.311   2
  -2   8 -10 787.813 309.840   3
  -2   8 -10 844.691 275.210   2
  -2   8 -11 3462.83 594.228   2
  -2   8 -11 2819.93 616.451   3
  -2   8 -12 1120.95 327.926   2
  -2   8 -12 1486.51 509.037   3
  -2   8 -13 35.3334 186.722   3
  -2   8 -14 219.882 147.199   3
  -2   8 -15-198.712 246.150   3
   2  -8  15-139.663 190.129   1
   2  -8  16-562.286 392.114   1
  -2   8 -16-78.0850 160.869   3
  -2   8 -17 984.340 442.752   3
   2  -8  17 1113.08 441.265   1
  -2   8 -18-179.744 202.197   3
   2  -8  18 112.098 241.455   1
   2  -8  19 79.3795 118.590   1
  -2   8 -19-71.3364 211.562   3
  -2   8 -20 146.384 208.617   3
   2  -8  20-494.166 359.091   1
  -2   7  18 1768.15 641.572   1
  -2   7  17 1024.29 485.426   1
  -2   7  16 1896.38 633.412   1
  -2   7  15 228.496 284.722   1
  -2   7  14 284.477 275.904   1
  -2   7  13 4917.98 919.199   1
  -2   7  12 482.789 298.821   1
  -2   7  11 18689.4 1604.41   1
   2  -7 -10 7422.45 946.496   3
   2  -7 -10 8174.46 1018.48   2
  -2   7  10 10152.1 1124.38   1
  -2   7   9 6206.13 832.968   1
   2  -7  -9 4625.60 736.034   3
   2  -7  -9 4178.32 699.691   2
   2  -7  -8-29.8459 106.636   1
   2  -7  -8 147.529 166.579   3
  -2   7   8-17.3246 93.3552   1
  -2   7   7 16313.2 1200.11   1
  -2   7   7 19163.6 1432.22   3
   2  -7  -7 19070.7 1396.52   3
   2  -7  -6 1999.75 463.217   3
  -2   7   6 2236.18 515.563   3
  -2   7   6 1753.39 360.042   1
   2  -7  -6 1521.71 361.529   2
  -2   7   5 17192.0 1225.18   3
  -2   7   5 17811.0 1120.69   1
   2  -7  -5 16520.4 1016.08   2
   2  -7  -5 19702.2 1380.91   3
   2  -7  -5 19503.5 1212.98   1
  -2   7   4 6374.78 730.703   3
   2  -7  -4 5319.91 526.492   2
  -2   7   4 5601.10 613.208   1
   2  -7  -4 7093.14 816.647   3
   2  -7  -4 6026.86 610.846   1
   2  -7  -3 34998.6 1782.41   3
   2  -7  -3 30187.1 1116.07   2
  -2   7   3 30851.7 1537.77   3
  -2   7   3 31992.1 1380.24   1
   2  -7  -3 32502.2 1386.32   1
   2  -7  -2 151047. 2761.48   1
   2  -7  -2 148695. 2171.82   2
  -2   7   2 150792. 2753.57   1
   2  -7  -1 2855.70 227.556   2
   2  -7  -1 3027.64 355.745   1
   2  -7  -1 3245.87 527.497   3
  -2   7   1 2911.31 370.093   1
   2  -7   0 19147.6 927.537   1
   2  -7   0 17383.4 1190.41   3
   2  -7   1 9696.92 895.834   3
   2  -7   1 11237.5 705.584   1
   2  -7   2 2238.20 313.633   1
   2  -7   2 2401.83 456.972   3
   2  -7   3 6429.85 729.849   3
  -2   7  -3 5509.16 285.128   2
   2  -7   4 39325.3 1864.32   3
  -2   7  -4 40081.9 1018.67   2
  -2   7  -5 99.1735 88.3619   2
   2  -7   5-44.3216 184.959   3
   2  -7   6 7059.50 832.374   3
  -2   7  -6 7834.32 601.148   2
  -2   7  -7 2074.10 461.856   3
  -2   7  -7 2180.38 372.745   2
  -2   7  -8 1648.80 317.468   2
  -2   7  -8 1625.17 407.580   3
  -2   7  -9 4258.73 701.459   3
  -2   7  -9 4234.58 578.867   2
  -2   7 -10 1189.81 310.606   3
  -2   7 -10 1741.49 396.903   2
  -2   7 -11 6505.51 946.000   3
  -2   7 -11 6533.52 806.118   2
  -2   7 -12 5278.06 767.005   2
  -2   7 -12 6804.10 984.446   3
  -2   7 -13 5316.93 903.998   3
   2  -7  13 4987.18 841.026   1
   2  -7  14 336.287 253.769   1
  -2   7 -14 172.196 181.133   3
   2  -7  15 3472.27 799.942   1
  -2   7 -15 4778.74 935.471   3
  -2   7 -16 20.6421 200.072   3
   2  -7  16 267.133 157.067   1
  -2   7 -17 3114.43 749.299   3
   2  -7  17 2523.79 743.580   1
  -2   7 -18 1089.37 478.683   3
   2  -7  18 737.419 398.323   1
  -2   7 -19-108.543 206.033   3
   2  -7  19 361.621 323.807   1
   2  -7  20-134.474 143.456   1
  -2   7 -20 620.389 377.051   3
  -2   6  18 2756.05 819.789   1
  -2   6  17 2154.49 664.337   1
  -2   6  16 112.877 245.379   1
  -2   6  15 475.660 303.464   1
  -2   6  14 7311.16 1123.03   1
  -2   6  13 6937.91 1034.11   1
  -2   6  12 460.530 292.555   1
   2  -6 -11 4496.29 731.858   3
  -2   6  11 6508.57 917.506   1
   2  -6 -10 292.164 282.381   2
   2  -6 -10 102.567 82.2616   3
  -2   6  10-159.457 247.561   1
   2  -6  -9 686.336 234.230   3
   2  -6  -9 1254.65 362.562   2
  -2   6   9 1244.32 432.344   1
  -2   6   8 869.792 328.716   1
   2  -6  -8 946.158 293.334   3
   2  -6  -7 54228.2 2208.67   3
  -2   6   7 58162.4 2323.21   3
   2  -6  -6 4386.97 622.830   3
   2  -6  -6 4096.10 546.023   2
  -2   6   6 4767.98 672.220   3
   2  -6  -6 4201.35 577.998   1
  -2   6   6 4423.94 577.846   1
  -2   6   5 37448.8 1708.36   3
  -2   6   5 34106.5 1476.28   1
   2  -6  -5 33057.3 1423.58   2
   2  -6  -5 39293.7 1800.33   3
   2  -6  -5 36625.5 1576.39   1
   2  -6  -4 239.344 175.273   2
  -2   6   4 197.304 158.118   3
   2  -6  -4-76.1790 116.373   3
   2  -6  -4 136.610 82.6802   1
  -2   6   4 195.060 148.078   1
   2  -6  -3 228.621 180.694   3
   2  -6  -3 154.427 127.652   2
  -2   6   3 38.0418 101.686   1
   2  -6  -3 98.6420 103.360   1
  -2   6   3 77.4604 109.256   3
   2  -6  -2 1078.98 176.319   2
  -2   6   2 1177.81 255.381   1
   2  -6  -2 1041.81 196.845   1
   2  -6  -2 1140.12 312.630   3
  -2   6   1 8510.45 552.257   1
   2  -6  -1 8436.42 766.861   3
   2  -6  -1 8471.49 535.273   1
   2  -6  -1 7419.44 340.357   2
   2  -6   0 11082.0 873.847   3
   2  -6   0 11628.5 614.009   1
   2  -6   1 2550.09 286.061   1
   2  -6   1 2362.38 398.305   3
   2  -6   2 11405.8 918.345   3
  -2   6  -3 1566.54 175.097   2
   2  -6   3 1518.06 331.642   3
   2  -6   4 49002.6 1992.32   3
  -2   6  -4 42188.1 1031.45   2
   2  -6   5 1365.48 321.985   3
  -2   6  -5 1345.29 237.032   2
  -2   6  -6 19514.9 892.645   2
  -2   6  -7 6722.62 573.874   2
  -2   6  -8 6502.98 806.673   3
  -2   6  -8 5798.60 602.869   2
  -2   6  -9 13723.6 1243.58   3
  -2   6  -9 12002.8 932.257   2
  -2   6 -10 267.748 199.361   2
  -2   6 -10 435.179 290.756   3
  -2   6 -11 2271.35 477.548   2
  -2   6 -11 2377.79 551.298   3
  -2   6 -12 53247.9 2726.07   3
   2  -6  12 53754.7 2665.56   1
   2  -6  13 1326.54 502.297   1
  -2   6 -13 907.003 384.407   3
   2  -6  14 560.053 371.052   1
  -2   6 -14 450.240 311.705   3
   2  -6  15 1263.67 476.604   1
  -2   6 -15 1380.94 440.594   3
   2  -6  16 225.642 171.031   1
  -2   6 -16 364.544 318.121   3
   2  -6  17 376.900 294.391   1
  -2   6 -17 335.205 127.621   3
   2  -6  18-253.114 312.660   1
  -2   6 -18-422.192 364.197   3
   2  -6  19 2178.03 675.345   1
  -2   6 -19 3073.95 794.396   3
   2  -6  20 1732.50 627.891   1
  -2   6 -20 1713.20 607.821   3
  -2   6 -21 1653.13 540.377   3
  -2   5  19 742.756 491.876   1
  -2   5  18 314.244 179.894   1
  -2   5  17 68.1142 228.084   1
  -2   5  16-131.335 228.922   1
  -2   5  15 154.863 243.259   1
  -2   5  14 805.288 373.867   1
  -2   5  13 2603.47 662.292   1
  -2   5  12 26245.9 1919.28   1
   2  -5 -12 19051.6 1492.44   3
  -2   5  11 2139.05 497.680   1
   2  -5 -11 1056.76 346.287   3
   2  -5 -10 22254.1 1654.06   2
   2  -5 -10 21281.9 1447.46   3
   2  -5  -9 5714.78 805.962   2
  -2   5   9 4974.74 659.454   2
   2  -5  -9 6056.90 741.381   3
  -2   5   9 4958.27 706.093   1
   2  -5  -8 6200.74 723.707   3
  -2   5   8 4848.46 594.658   2
  -2   5   8 5995.42 751.193   1
   2  -5  -7 883.187 272.340   2
  -2   5   7 1360.27 328.469   1
  -2   5   7 964.934 297.314   2
   2  -5  -7 1099.48 297.904   3
  -2   5   6 6488.34 601.067   2
   2  -5  -6 8911.27 817.305   3
   2  -5  -6 8215.50 773.553   2
  -2   5   6 10510.1 903.203   3
  -2   5   6 7832.72 759.086   1
  -2   5   5 27324.7 1356.50   3
  -2   5   5 21413.0 1023.64   2
   2  -5  -5 24281.0 1234.03   1
   2  -5  -5 27868.8 1403.83   3
  -2   5   5 23677.3 1198.01   1
   2  -5  -5 25360.9 1260.71   2
  -2   5   4 4528.57 487.830   1
   2  -5  -4 5238.36 607.119   3
   2  -5  -4 4903.91 498.382   2
  -2   5   4 5004.45 557.362   3
   2  -5  -4 5333.96 531.841   1
  -2   5   4 4887.28 458.405   2
  -2   5   3 134037. 2286.54   1
   2  -5  -3 133941. 2257.59   2
  -2   5   3 130759. 2072.78   2
  -2   5   3 134919. 2765.76   3
   2  -5  -3 136418. 2369.93   1
   2  -5  -2 64333.2 1975.50   3
  -2   5   2 64108.7 1227.23   2
  -2   5   2 65458.7 1445.81   1
   2  -5  -2 61626.7 1273.85   2
  -2   5   1 4077.13 242.677   2
   2  -5  -1 3521.51 236.370   2
   2  -5  -1 3588.52 303.896   1
   2  -5  -1 4116.17 483.834   3
  -2   5   1 3808.96 326.521   1
   2  -5   0 21120.1 648.264   1
   2  -5   0 20565.3 1102.99   3
   2  -5   1 24079.5 703.398   1
   2  -5   1 22428.5 1173.45   3
   2  -5   2 28377.2 1352.61   3
  -2   5  -2 24159.9 568.955   2
   2  -5   3 5564.61 612.854   3
  -2   5  -3 5272.40 335.469   2
  -2   5  -4 24144.3 882.602   2
   2  -5   4 24580.9 1357.95   3
  -2   5  -5 7597.22 572.050   2
  -2   5  -6 46.4923 126.271   2
  -2   5  -7 4699.64 525.700   2
  -2   5  -8 9313.13 804.482   2
  -2   5  -8 9853.96 972.889   3
  -2   5  -9 1463.42 341.015   2
  -2   5  -9 1664.05 416.776   3
  -2   5 -10 210.308 175.741   2
   2  -5  10 125.228 198.507   1
  -2   5 -10 71.2614 218.605   3
  -2   5 -11 5641.35 716.718   2
  -2   5 -11 7535.06 973.876   3
   2  -5  11 8427.25 1020.12   1
  -2   5 -12 2851.83 631.495   3
   2  -5  12 3446.11 692.962   1
  -2   5 -13-104.134 224.678   3
   2  -5  13 206.259 187.608   1
   2  -5  14 2136.25 594.393   1
  -2   5 -14 3096.97 707.781   3
  -2   5 -15 1326.48 512.019   3
   2  -5  15 1718.15 567.643   1
   2  -5  16 57.0778 219.671   1
  -2   5 -16 29.2733 227.454   3
   2  -5  17 197.255 141.712   1
  -2   5 -17 372.945 268.222   3
   2  -5  18 264.468 174.518   1
  -2   5 -18 640.893 382.282   3
  -2   5 -19 194.425 219.615   3
   2  -5  19 86.7688 274.217   1
   2  -5  20 94.5137 268.165   1
  -2   5 -20-203.369 185.077   3
  -2   5 -21 2502.67 777.994   3
  -2   4  19-379.051 240.273   1
  -2   4  18 1778.93 638.662   1
  -2   4  17 3265.94 842.525   1
  -2   4  16-8.82951 168.748   1
  -2   4  15 11403.9 1405.80   1
   2  -4 -14 169.740 176.691   3
  -2   4  14 426.269 314.769   1
   2  -4 -13 34.5097 138.097   3
  -2   4  13-258.267 271.522   1
  -2   4  12 259.730 167.393   1
   2  -4 -12 540.923 238.140   3
  -2   4  11 887.538 341.686   1
   2  -4 -11 1195.58 441.664   2
   2  -4 -11 824.080 305.395   3
  -2   4  11 1179.19 337.582   2
  -2   4  10 16427.8 1218.34   2
   2  -4 -10 17891.0 1467.96   2
  -2   4  10 17882.6 1377.90   1
   2  -4 -10 14744.0 1152.10   3
   2  -4  -9 19704.3 1270.00   3
   2  -4  -9 21319.1 1510.33   2
  -2   4   9 18863.0 1372.18   1
  -2   4   9 16518.7 1163.70   2
  -2   4   8 34788.2 1621.24   2
  -2   4   8 37822.5 1827.83   1
   2  -4  -8 40991.3 1744.78   3
  -2   4   7 6996.13 750.562   1
   2  -4  -7 8225.16 821.297   2
   2  -4  -7 7729.98 717.330   3
  -2   4   7 6757.46 677.967   2
  -2   4   6 6079.66 633.745   3
   2  -4  -6 5654.11 641.224   2
   2  -4  -6 5422.38 588.008   3
  -2   4   6 5088.16 559.504   2
  -2   4   6 5156.20 588.258   1
   2  -4  -5 426.234 215.025   2
  -2   4   5 380.364 182.832   1
   2  -4  -5 656.246 225.454   3
  -2   4   5 429.024 151.637   2
  -2   4   5 427.568 197.184   3
   2  -4  -4 430.862 159.287   2
  -2   4   4 468.016 164.758   3
  -2   4   4 481.618 168.836   1
   2  -4  -4 451.179 176.698   3
  -2   4   4 615.563 178.637   2
  -2   4   3 117854. 2348.44   3
   2  -4  -3 128126. 2580.26   3
   2  -4  -3 112668. 2067.77   2
  -2   4   3 129337. 2010.61   2
  -2   4   3 121638. 2059.39   1
  -2   4   2 96233.8 1544.76   1
  -2   4   2 91387.8 1490.79   2
   2  -4  -2 99900.0 2208.67   3
   2  -4  -2 94022.8 1546.30   1
  -2   4   2 102633. 2241.53   3
   2  -4  -2 90783.3 1515.48   2
  -2   4   1 105.367 39.1508   2
  -2   4   1 107.051 55.5766   1
   2  -4  -1 275.085 69.3301   1
   2  -4  -1 87.8377 99.3630   3
   2  -4  -1 165.009 65.8474   2
  -2   4   0 22168.1 552.803   2
   2  -4   0 24700.1 1108.25   3
   2  -4   1 28863.0 1238.20   3
   2  -4   2 0.24561 84.4548   3
  -2   4  -4 11359.4 615.837   2
  -2   4  -5 20486.1 939.346   2
  -2   4  -6 5580.96 545.120   2
  -2   4  -7 31136.0 1422.34   2
   2  -4   7 33051.7 1516.15   1
   2  -4   8 189.542 206.245   1
  -2   4  -8 250.025 146.881   2
  -2   4  -9 2930.49 487.870   2
   2  -4   9 3771.98 627.360   1
  -2   4 -10 440.411 258.791   2
   2  -4  10 351.403 222.798   1
   2  -4  11 4165.67 711.248   1
  -2   4 -11 3769.54 634.259   2
   2  -4  12 4716.43 790.563   1
   2  -4  13 5.38114 123.737   1
   2  -4  14 5074.94 902.721   1
   2  -4  15 17.9160 123.104   1
   2  -4  16 4048.39 838.656   1
  -2   4 -17 6484.53 1128.10   3
   2  -4  17 5759.70 1045.16   1
   2  -4  18 150.651 235.890   1
  -2   4 -18 358.276 263.335   3
  -2   4 -19 2668.92 785.239   3
   2  -4  19 2644.31 797.776   1
  -2   4 -20-233.325 329.660   3
  -2   4 -21-95.9707 162.446   3
  -2   3  19 795.049 458.903   1
  -2   3  18-105.041 279.260   1
  -2   3  17-95.1339 194.289   1
  -2   3  16 751.779 453.300   1
  -2   3  15 21903.6 1893.02   1
  -2   3  14 154.515 249.160   1
   2  -3 -14 508.260 248.755   3
  -2   3  13 739.340 289.686   1
   2  -3 -13 709.453 283.409   3
  -2   3  13 765.804 307.889   2
   2  -3 -12 17106.8 1290.37   3
  -2   3  12 20786.7 1498.40   2
  -2   3  12 21442.5 1703.18   1
  -2   3  11 7159.65 841.130   2
   2  -3 -11 5902.11 716.955   3
   2  -3 -11 9195.98 1080.35   2
  -2   3  11 8550.17 1011.24   1
   2  -3 -10 4018.68 570.682   3
  -2   3  10 4896.79 696.252   2
   2  -3 -10 5184.24 767.607   2
  -2   3  10 5126.09 724.377   1
   2  -3  -9 14657.9 1031.56   3
  -2   3   9 13087.0 1062.66   2
  -2   3   9 15292.2 1206.48   1
   2  -3  -9 14998.4 1248.97   2
  -2   3   8 1189.30 330.877   1
  -2   3   8 1258.18 316.088   2
   2  -3  -8 1417.25 290.753   3
  -2   3   7-120.678 209.885   1
   2  -3  -7 119.178 134.728   3
  -2   3   7 42.5106 118.216   2
   2  -3  -6 6666.37 585.307   3
  -2   3   6 6370.46 609.986   2
  -2   3   6 6132.39 642.161   1
  -2   3   5 8748.75 652.286   2
   2  -3  -5 8054.74 663.176   2
  -2   3   5 8294.57 635.533   3
  -2   3   5 7840.25 673.721   1
   2  -3  -5 9022.91 664.801   3
   2  -3  -4 994.947 216.063   3
   2  -3  -4 633.630 197.401   2
  -2   3   4 1081.49 219.845   2
  -2   3   4 344.267 133.683   3
  -2   3   4 712.707 167.410   1
  -2   3   3 19793.2 875.086   3
   2  -3  -3 20144.9 821.841   2
  -2   3   3 23627.8 1014.26   2
  -2   3   3 21334.9 834.582   1
   2  -3  -3 21682.7 924.858   3
   2  -3  -2 67024.7 1323.63   2
  -2   3   2 69906.4 1597.00   3
   2  -3  -2 71017.0 1659.64   3
  -2   3   2 68693.8 1332.75   2
  -2   3   2 72240.9 1250.65   1
   2  -3  -1 18731.2 861.370   3
  -2   3   1 17138.4 585.715   2
   2  -3  -1 18088.0 625.716   2
   2  -3   0 13679.4 753.596   3
  -2   3   0 13174.4 521.412   2
   2  -3   1 12674.1 769.968   3
   2  -3   2 56823.1 1003.98   1
   2  -3   3 64872.0 1366.24   1
   2  -3   4 17486.2 825.016   1
   2  -3   5 677.944 198.887   1
   2  -3   6-113.017 179.693   1
  -2   3  -6-161.262 128.902   2
   2  -3   7 1246.41 293.013   1
  -2   3  -7 909.867 260.148   2
  -2   3  -8 4383.31 599.947   2
   2  -3   8 4802.94 629.378   1
  -2   3  -9 16821.0 1229.70   2
   2  -3   9 18382.7 1307.30   1
  -2   3 -10 12130.1 1102.80   2
   2  -3  10 14462.9 1229.68   1
  -2   3 -11 29833.9 1820.71   2
   2  -3  11 34454.0 2037.94   1
   2  -3  12 2237.24 552.862   1
   2  -3  13 4098.01 727.798   1
   2  -3  14-235.942 255.870   1
   2  -3  15 8537.75 1175.74   1
   2  -3  16-243.540 287.965   1
   2  -3  17 187.153 190.104   1
   2  -3  18 1982.63 630.562   1
   2  -3  19 262.364 271.700   1
  -2   3 -20-167.584 245.121   3
  -2   2  20 4172.39 1040.02   1
  -2   2  19 343.999 322.374   1
  -2   2  18 1506.07 536.058   1
  -2   2  17 592.414 354.127   1
  -2   2  16 2490.37 763.391   1
  -2   2  15 310.377 271.101   1
  -2   2  15 182.953 227.969   2
   2  -2 -15 5.85824 143.167   3
  -2   2  14 2106.90 635.190   1
   2  -2 -14 1147.41 372.163   3
  -2   2  14 1837.24 483.195   2
   2  -2 -13 3424.72 601.469   3
  -2   2  13 4184.74 718.484   2
  -2   2  13 5381.67 895.570   1
   2  -2 -12 3518.91 587.333   3
  -2   2  12 4236.17 764.759   1
  -2   2  12 4055.64 715.273   2
  -2   2  11 1246.47 406.534   1
   2  -2 -11 765.309 393.098   2
  -2   2  11 1050.89 362.092   2
   2  -2 -11 518.057 192.190   3
  -2   2  10-256.153 221.132   1
   2  -2 -10 18.9589 131.533   3
  -2   2  10-2.02042 180.808   2
   2  -2  -9 11382.6 836.778   3
  -2   2   9 10748.4 1016.39   1
  -2   2   9 10345.0 941.176   2
  -2   2   8 13598.3 1017.40   2
   2  -2  -8 16176.2 934.635   3
  -2   2   8 15429.8 1142.72   1
   2  -2  -7 14908.1 837.617   3
  -2   2   7 13738.2 958.828   2
   2  -2  -6 6870.80 522.980   3
  -2   2   6 6431.37 586.094   2
   2  -2  -5 1572.32 242.212   3
  -2   2   5 2164.34 330.401   2
  -2   2   5 1532.87 240.806   3
   2  -2  -4 1684.42 244.797   3
  -2   2   4 1790.56 283.153   2
  -2   2   4 1510.09 225.710   3
  -2   2   3 59922.1 1300.60   3
   2  -2  -3 63405.9 1343.62   3
  -2   2   2 189978. 2315.84   3
   2  -2  -2 198988. 2414.70   3
  -2   2   2 191801. 2296.09   2
   2  -2  -1 345729. 3315.58   3
  -2   2   1 343527. 2891.29   2
  -2   2   0 116069. 1731.43   2
   2  -2   0 110290. 2023.24   3
  -2   2  -1 136071. 1341.25   1
   2  -2   1 108465. 1250.58   1
   2  -2   2 47280.3 1015.04   1
  -2   2  -2 46936.3 1055.96   1
   2  -2   3 2182.31 265.260   1
   2  -2   4 61562.9 1603.05   1
   2  -2   5 65326.4 1786.15   1
   2  -2   6 54613.6 1787.31   1
  -2   2  -7 33690.3 1532.92   2
   2  -2   7 36363.1 1598.49   1
   2  -2   8 16903.2 1171.98   1
  -2   2  -8 17089.9 1180.73   2
  -2   2  -9 894.040 281.103   2
   2  -2   9 1404.51 394.793   1
   2  -2  10 68.0550 117.791   1
  -2   2 -10-101.507 184.713   2
   2  -2  11 254.498 156.103   1
   2  -2  12 1052.17 373.644   1
   2  -2  13 195.506 257.767   1
   2  -2  14 2780.77 643.236   1
   2  -2  15 98.6408 404.463   1
   2  -2  16 195.921 149.696   1
   2  -2  17 12.7326 190.470   1
   2  -2  18 932.569 484.797   1
   2  -2  19 240.982 192.266   1
  -2   1  20 42.5474 250.363   1
  -2   1  19 386.925 270.398   1
  -2   1  18 1291.21 505.786   1
  -2   1  17 58.5517 177.640   1
  -2   1  16 878.539 435.186   1
   2  -1 -16 833.211 369.295   3
  -2   1  16 840.503 347.111   2
   2  -1 -15 10644.9 1116.53   3
  -2   1  15 7496.57 1027.27   2
  -2   1  15 9270.49 1247.62   1
  -2   1  14 4922.18 865.753   1
   2  -1 -14 3259.98 574.346   3
  -2   1  14 3917.89 682.431   2
   2  -1 -13 117.772 130.424   3
  -2   1  13-108.175 214.739   2
  -2   1  13 380.576 295.720   1
   2  -1 -12 207.810 144.358   3
  -2   1  12 738.243 318.602   2
  -2   1  12 357.133 258.607   1
  -2   1  11 22599.2 1562.62   2
   2  -1 -11 20599.7 1224.78   3
  -2   1  10 2306.04 463.214   2
   2  -1 -10 2272.40 420.812   3
   2  -1  -9 2642.77 396.405   3
  -2   1   9 2206.32 448.711   2
   2  -1  -8 4449.47 451.045   3
  -2   1   8 3490.32 513.016   2
  -2   1   7 394.822 213.969   2
   2  -1  -7 424.756 254.033   3
   2  -1  -6 17049.6 713.792   3
  -2   1   6 20327.7 1109.73   2
   2  -1  -5 1230.13 189.473   3
  -2   1   5 1413.97 314.225   2
   2  -1  -4 57434.0 1079.02   3
  -2   1   4 57266.3 1093.60   3
   2  -1  -3 176705. 1840.98   3
  -2   1   3 165038. 1806.02   3
   2  -1  -2 660710. 3915.99   3
  -2   1   2 609058. 4648.34   2
  -2   1   1 6202.58 483.751   3
  -2   1   1 6812.31 462.126   2
  -2   1   0 2128.34 251.711   2
  -2   1   0 1870.79 191.341   1
  -2   1  -1 451719. 3067.07   1
   2  -1   1 420198. 3258.36   1
   2  -1   2 158419. 2187.63   1
  -2   1  -2 168766. 2279.36   1
   2  -1   3 5982.48 503.441   1
  -2   1  -3 6201.88 521.468   1
  -2   1  -4 14315.1 824.555   1
   2  -1   4 15630.6 884.676   1
   2  -1   5 467.642 207.113   1
  -2   1  -5 646.575 207.300   1
   2  -1   6 88231.7 2413.00   1
   2  -1   7 6621.99 726.519   1
   2  -1   8 2058.43 440.886   1
  -2   1  -8 2375.83 461.095   2
  -2   1  -9 4967.15 680.082   2
   2  -1   9 5121.41 714.957   1
   2  -1  10 5757.23 787.502   1
  -2   1 -10 5513.68 773.905   2
   2  -1  11 841.293 348.860   1
   2  -1  12 12478.5 1317.15   1
   2  -1  13 1393.42 456.920   1
   2  -1  14 730.825 416.462   1
   2  -1  15 3457.17 767.509   1
   2  -1  16 5638.02 1031.74   1
   2  -1  17 589.818 373.207   1
   2  -1  18 3878.22 897.886   1
   2  -1  19 90.4478 202.056   1
  -2   0  20-352.702 352.527   1
  -2   0  19 1667.91 591.199   1
  -2   0  18-351.352 315.659   1
  -2   0  17 183.034 247.471   1
  -2   0  17 430.661 300.365   2
   2   0 -16 4418.10 718.513   3
  -2   0  16 3987.12 807.331   2
  -2   0  16 4593.59 896.414   1
  -2   0  15 993.124 356.466   2
  -2   0  15 955.063 403.394   1
   2   0 -15 713.712 288.662   3
  -2   0  14 2204.23 563.323   2
  -2   0  14 3648.85 753.997   1
  -2   0  13 298.099 166.160   2
  -2   0  12 3029.71 583.712   2
  -2   0  11 4100.60 670.339   2
  -2   0  10 17707.6 1271.24   2
  -2   0   9 5924.82 688.248   2
  -2   0   8 695.932 245.215   2
   2   0  -8 572.949 151.005   3
  -2   0   7 64408.7 2134.71   2
   2   0  -7 57166.9 1328.95   3
  -2   0   6 15851.7 1004.09   2
   2   0  -6 12288.4 510.058   3
  -2   0   5 73194.4 1961.04   2
   2   0  -5 53388.3 867.116   3
  -2   0   4 23115.0 1030.34   2
  -2   0   3 53250.6 1496.69   2
  -2   0   2 981094. 4019.73   3
  -2   0   2 978208. 5959.78   2
  -2   0   1 131847. 2352.65   2
  -2   0   0 58659.7 1321.30   1
   2   0   0 48850.9 1321.90   1
  -2   0  -1 19329.7 822.528   1
   2   0   1 18258.4 814.065   1
  -2   0  -2 86406.1 1811.12   1
   2   0   2 92166.6 1912.60   1
   2   0   3 165376. 2665.12   1
  -2   0  -3 147966. 2645.33   1
   2   0   4 15481.0 906.750   1
  -2   0  -4 11497.0 764.270   1
   2   0   5 8504.50 726.834   1
  -2   0  -5 8892.31 752.914   1
   2   0   6 7438.18 726.389   1
  -2   0  -6 7813.27 753.171   1
   2   0   7 27672.0 1475.81   1
  -2   0  -7 29090.7 1580.45   1
   2   0   8 181.771 175.973   1
  -2   0  -8 187.560 239.988   2
   2   0   9 1201.64 360.649   1
  -2   0  -9 1066.30 293.349   2
   2   0  10 247.010 202.587   1
  -2   0 -10 437.161 255.293   2
   2   0  11 1402.22 399.649   1
   2   0  12 3089.72 641.695   1
   2   0  13 7794.65 1072.06   1
   2   0  14 584.554 301.208   1
   2   0  15 2238.12 619.926   1
   2   0  16-469.750 342.543   1
   2   0  17 133.681 207.026   1
   2   0  18 3792.20 919.889   1
   2   0  19 236.511 239.094   1
  -2  -1  20 174.914 213.472   1
  -2  -1  19 3057.43 813.379   1
  -2  -1  18 161.454 169.199   1
  -2  -1  18 166.581 154.358   2
  -2  -1  17 2754.79 767.079   1
  -2  -1  17 2291.44 598.356   2
  -2  -1  16 296.087 422.447   1
  -2  -1  16 556.910 381.144   2
  -2  -1  15 49.5258 171.663   2
  -2  -1  14 14806.5 1459.88   2
  -2  -1  13 1155.42 365.095   2
  -2  -1  12 30888.0 1881.31   2
   2   1 -11 12365.2 1174.81   2
  -2  -1  11 11994.7 1118.59   2
  -2  -1  10 7754.16 853.762   2
  -2  -1   9 1212.86 334.769   2
  -2  -1   8-240.814 191.934   2
  -2  -1   7 21955.8 1306.18   2
  -2  -1   6 7790.62 717.307   2
   2   1  -6 4584.10 273.365   3
  -2  -1   5 8336.46 661.840   2
  -2  -1   4 29361.1 1159.39   2
  -2  -1   3 153903. 2597.85   2
  -2  -1   2 435809. 4276.75   2
  -2  -1   1 165696. 2681.35   2
  -2  -1   0 96870.6 1959.19   1
   2   1   0 90699.0 1883.57   1
   2   1   1 233928. 3238.28   1
  -2  -1  -1 256309. 3412.28   1
  -2  -1  -2 12413.9 770.224   1
   2   1   2 13349.5 821.574   1
  -2  -1  -3 14389.4 870.488   1
   2   1   3 16822.2 981.696   1
  -2  -1  -4 2659.52 404.936   1
   2   1   4 1843.14 358.328   1
  -2  -1  -5 2961.22 433.317   1
   2   1   5 1659.88 337.441   1
   2   1   6 11424.8 934.103   1
  -2  -1  -6 13983.4 1060.89   1
  -2  -1  -7 980.408 316.833   1
   2   1   7 934.561 310.541   1
  -2  -1  -8 1533.40 389.273   1
   2   1   8 690.705 265.800   1
  -2  -1  -9 513.161 224.574   2
   2   1   9 451.782 225.062   1
   2   1  10 885.762 342.373   1
   2   1  11 3477.52 671.739   1
   2   1  12 1898.48 543.285   1
   2   1  13 5920.13 929.538   1
   2   1  14-158.203 301.925   1
   2   1  15 6477.77 1075.79   1
   2   1  16 861.588 433.111   1
   2   1  17 6437.55 1139.83   1
   2   1  18-297.328 331.133   1
  -2  -2  20 2571.51 782.732   1
   2   2 -19 3511.51 717.014   3
  -2  -2  19 2499.02 716.651   2
  -2  -2  19 1752.29 640.164   1
  -2  -2  18 1173.00 486.329   1
  -2  -2  18 553.297 339.571   2
  -2  -2  17 13834.7 1513.79   2
  -2  -2  17 16810.3 1843.20   1
  -2  -2  16 4795.57 868.743   2
  -2  -2  15 9344.61 1167.85   2
  -2  -2  14 6057.84 935.375   2
  -2  -2  13 216.832 430.068   2
  -2  -2  12 15698.8 1343.26   2
  -2  -2  11 3110.42 602.263   2
   2   2 -11 3583.51 650.550   2
  -2  -2  10 1771.02 414.507   2
  -2  -2   9 5202.30 697.804   2
  -2  -2   8 13076.7 1053.65   2
   2   2  -8 11715.3 569.342   3
   2   2  -7 11479.2 462.872   3
  -2  -2   7 11708.7 978.330   2
  -2  -2   6 24295.9 1259.80   2
  -2  -2   5 4824.19 529.357   2
  -2  -2   4 86530.1 2093.56   2
  -2  -2   3 348214. 2509.72   3
  -2  -2   3 370619. 4158.93   2
  -2  -2   2 436234. 5045.82   2
  -2  -2   1 3941.12 502.634   2
   2   2   0 45330.8 1495.81   1
   2   2   1 2207.20 382.268   1
   2   2   2 35418.4 1510.67   1
   2   2   3 55236.7 1912.27   1
  -2  -2  -3 53487.6 1808.37   1
   2   2   4 80354.2 2431.88   1
  -2  -2  -4 84744.5 2434.84   1
   2   2   5 42.6209 138.502   1
  -2  -2  -5 240.226 152.576   1
   2   2   6 15726.8 1119.41   1
  -2  -2  -6 18161.3 1228.85   1
  -2  -2  -7 1217.93 367.257   1
   2   2   7 910.372 281.629   1
   2   2   8 10569.4 1021.60   1
  -2  -2  -8 13231.7 1205.97   1
  -2  -2  -9 1335.13 426.760   1
   2   2   9 1192.24 361.113   1
   2   2  10 30249.8 1953.91   1
   2   2  11 33161.8 2116.83   1
   2   2  12 2379.56 566.683   1
   2   2  13 5207.06 894.507   1
   2   2  14-235.570 290.999   1
   2   2  15 6393.41 1078.17   1
   2   2  16 59.6091 147.616   1
   2   2  17 4967.48 1024.28   1
   2   2  18 2560.71 804.139   1
  -2  -3  20 8129.56 1409.89   1
  -2  -3  20 6221.60 1137.25   2
  -2  -3  19 1101.71 448.199   2
  -2  -3  19-105.107 245.473   1
   2   3 -18 466.845 237.903   3
  -2  -3  18 382.431 402.965   2
   2   3 -17 2345.25 513.640   3
  -2  -3  17 1779.88 576.340   2
  -2  -3  16 9.71336 341.406   2
  -2  -3  15 360.389 161.799   2
   2   3 -14 1446.96 352.890   3
  -2  -3  14 2367.16 550.773   2
   2   3 -13 39825.1 1686.87   3
  -2  -3  13 33073.6 2033.02   2
  -2  -3  12 14750.1 1339.43   2
   2   3 -12 18617.4 1073.90   3
   2   3 -11 1325.57 364.712   2
  -2  -3  11 962.935 333.873   2
   2   3 -11 1176.29 257.058   3
  -2  -3  10 10703.7 1034.46   2
   2   3 -10 11977.2 716.442   3
   2   3 -10 10195.1 980.868   2
  -2  -3   9 902.831 283.927   2
   2   3  -9 1260.38 202.201   3
   2   3  -9 947.551 304.785   2
  -2  -3   8 1300.42 322.877   2
   2   3  -8 1671.69 204.188   3
  -2  -3   7 6678.31 710.497   2
   2   3  -7 5631.46 333.597   3
  -2  -3   6 355.368 197.234   2
   2   3  -6 246.028 72.6069   3
   2   3  -5 5181.80 299.566   3
  -2  -3   5 4639.06 279.071   3
  -2  -3   5 4833.61 586.725   2
  -2  -3   4 9281.52 439.810   3
  -2  -3   4 9406.38 825.920   2
  -2  -3   3 49797.7 1125.76   3
  -2  -3   3 41528.8 1553.48   2
  -2  -3   2 10090.9 574.688   3
  -2  -3   2 6397.07 608.972   2
  -2  -3   1 15725.5 814.423   3
  -2  -3   1 13341.3 924.744   2
   2   3   0 19632.8 1069.83   1
   2   3   1 5495.30 592.678   1
   2   3   2-89.4764 98.0026   1
   2   3   3 30067.9 1500.95   1
   2   3   4 46.4345 119.375   1
   2   3   5 9330.65 892.067   1
   2   3   6-22.3269 120.350   1
  -2  -3  -6 84.2639 94.8884   1
   2   3   7 745.314 325.609   1
  -2  -3  -7 486.561 229.916   1
   2   3   8 6767.35 847.900   1
  -2  -3  -8 8121.34 963.900   1
   2   3   9 572.640 326.326   1
   2   3  10 35967.8 2111.20   1
   2   3  11 8060.98 1037.63   1
   2   3  12 3951.08 773.971   1
   2   3  13 1082.37 432.660   1
   2   3  14 7456.17 1140.17   1
   2   3  15 1605.21 542.028   1
   2   3  16 710.027 446.132   1
   2   3  17 335.240 358.366   1
  -2  -4  20 5358.79 1074.58   2
  -2  -4  20 8189.49 1412.57   1
  -2  -4  19 714.591 446.967   2
   2   4 -18 4109.25 679.283   3
  -2  -4  18 2292.48 637.310   2
  -2  -4  17 1628.88 639.166   2
  -2  -4  16 4998.76 956.716   2
   2   4 -15 54.0038 60.2291   3
  -2  -4  15 61.9265 231.727   2
   2   4 -14 3010.57 466.393   3
  -2  -4  14 3271.66 664.880   2
  -2  -4  13 55905.1 2700.27   2
   2   4 -13 68137.4 2129.47   3
   2   4 -12 9122.73 722.071   3
  -2  -4  12 6708.48 861.702   2
   2   4 -11 3414.48 404.768   3
  -2  -4  11 3132.17 626.649   2
   2   4 -11 3164.52 575.688   2
   2   4 -10 1119.88 364.313   2
   2   4 -10 914.084 191.971   3
  -2  -4  10 565.650 269.844   2
  -2  -4   9 979.609 311.849   2
   2   4  -9 1215.22 204.454   3
   2   4  -9 1224.89 345.657   2
   2   4  -8 4769.37 370.274   3
   2   4  -8 4357.41 591.194   2
  -2  -4   8 4582.68 632.130   2
  -2  -4   7 11547.2 984.161   2
   2   4  -7 11928.1 572.295   3
   2   4  -7 11611.6 934.447   2
   2   4  -6 110202. 2727.02   2
   2   4  -6 113720. 1683.39   3
  -2  -4   5 71393.1 1397.74   3
   2   4  -5 75983.9 2199.43   2
  -2  -4   5 74430.7 2192.10   2
   2   4  -4 46812.0 1283.10   3
  -2  -4   4 43306.8 1179.40   3
   2   4  -4 41921.9 1588.13   2
  -2  -4   4 44800.1 1742.46   2
  -2  -4   3 62553.2 1513.23   3
  -2  -4   3 51665.9 1752.61   2
  -2  -4   2 37384.7 1522.21   2
  -2  -4   2 42161.9 1341.08   3
  -2  -4   1 7254.68 651.287   3
  -2  -4   1 7344.94 673.905   2
  -2  -4   0 35717.8 1481.43   3
   2   4   0 30227.7 1433.28   1
   2   4   1 207.936 127.715   1
  -2  -4  -1 10.6602 101.195   3
   2   4   2 7291.75 743.386   1
   2   4   3 589.052 218.787   1
   2   4   4 11636.9 1024.16   1
   2   4   5 1800.80 437.853   1
  -2  -4  -6 743.446 275.985   1
   2   4   6 384.003 226.636   1
   2   4   7 262.466 229.361   1
  -2  -4  -7 609.422 285.536   1
   2   4   8 978.419 351.587   1
  -2  -4  -8 1262.34 380.386   1
   2   4   9 29406.4 1933.23   1
   2   4  10 433.153 310.085   1
   2   4  11 14549.0 1443.62   1
   2   4  12 3128.16 702.359   1
   2   4  13 366.552 318.036   1
   2   4  14 7676.91 1214.75   1
   2   4  15 627.162 375.683   1
   2   4  16 1029.65 472.506   1
   2   4  17 671.414 380.122   1
  -2  -5  20 1321.22 532.004   2
  -2  -5  19 2887.04 759.583   2
   2   5 -18 2821.20 549.726   3
  -2  -5  18 1615.74 551.288   2
  -2  -5  17 8458.09 1222.24   2
  -2  -5  16 3245.28 743.484   2
   2   5 -15 80.6905 113.555   3
  -2  -5  15 76.5190 161.413   2
   2   5 -14 254.366 142.944   3
  -2  -5  14 104.971 135.333   2
   2   5 -13 5277.85 591.171   3
  -2  -5  13 4612.55 744.388   2
  -2  -5  12 223.830 231.142   2
   2   5 -12-37.6412 114.642   3
   2   5 -11 10998.2 742.514   3
   2   5 -11 11607.9 1094.77   2
  -2  -5  11 10534.2 1074.93   2
   2   5 -10 1536.26 256.719   3
   2   5 -10 1344.61 322.281   2
  -2  -5  10 1455.12 445.305   2
   2   5  -9 3132.26 355.057   3
  -2  -5   9 2881.69 544.925   2
   2   5  -9 2590.50 482.278   2
  -2  -5   8 36308.0 1812.54   2
   2   5  -8 33824.8 1704.18   2
   2   5  -8 36655.6 1180.03   3
   2   5  -7 141.727 55.2473   3
  -2  -5   7-9.58362 59.1669   3
  -2  -5   7-20.1731 140.098   2
   2   5  -7 11.9593 163.308   2
   2   5  -6 1151.54 213.342   3
  -2  -5   6 1072.41 202.547   3
  -2  -5   6 864.638 267.886   2
   2   5  -6 1290.15 297.946   2
  -2  -5   5 1229.89 288.198   2
   2   5  -5 2047.36 295.762   3
  -2  -5   5 1365.81 227.503   3
   2   5  -5 1503.85 319.531   2
   2   5  -4 2906.57 368.922   3
   2   5  -4 2780.22 420.054   2
  -2  -5   4 3019.33 362.632   3
  -2  -5   4 2450.13 376.230   2
  -2  -5   3 13683.9 811.741   3
   2   5  -3 12926.2 888.218   2
  -2  -5   3 13461.7 943.417   2
   2   5  -3 15540.0 879.124   3
  -2  -5   2 6974.90 608.174   3
  -2  -5   2 7471.17 697.894   2
  -2  -5   1 28414.1 1319.31   3
  -2  -5   1 28462.8 1400.73   2
  -2  -5   0 18521.8 1094.16   3
   2   5   0 17190.7 1160.48   1
   2   5   1 5273.95 634.395   1
  -2  -5  -1 6079.10 685.322   3
   2   5   2 24725.3 1447.63   1
  -2  -5  -2 25011.4 1429.56   3
  -2  -5  -3 17598.3 1242.93   3
   2   5   3 18033.1 1282.19   1
   2   5   4 4242.84 667.992   1
   2   5   5 216.783 186.660   1
   2   5   6 792.183 314.064   1
  -2  -5  -6 1269.91 402.913   1
   2   5   7 5431.64 808.601   1
  -2  -5  -7 6821.19 920.109   1
   2   5   8 6673.56 916.008   1
   2   5   9 81789.7 3369.35   1
   2   5  10 245.969 358.001   1
   2   5  11 1261.23 425.771   1
   2   5  12-439.747 256.382   1
   2   5  13 57.3499 137.953   1
   2   5  14 679.977 383.814   1
   2   5  15 129.455 273.198   1
   2   5  16 886.250 416.266   1
  -2  -6  20 1523.78 546.561   2
  -2  -6  19-30.1786 139.222   2
  -2  -6  18-142.542 184.762   2
  -2  -6  17 641.734 327.888   2
  -2  -6  16 5809.52 979.096   2
   2   6 -15 3039.58 486.805   3
  -2  -6  15 10388.1 1247.53   2
  -2  -6  14-204.248 282.324   2
   2   6 -14 39.1032 76.1120   3
   2   6 -13 9705.89 794.393   3
  -2  -6  13 9546.57 1052.76   2
   2   6 -12 703.741 204.200   3
  -2  -6  12 520.876 309.133   2
  -2  -6  11 24780.7 1720.71   2
   2   6 -11 26692.1 1190.17   3
   2   6 -11 26267.1 1666.78   2
  -2  -6  10 5750.09 795.073   2
   2   6 -10 4011.03 625.498   2
   2   6 -10 6271.46 544.316   3
   2   6  -9 382.942 91.0760   3
   2   6  -9 206.101 141.477   2
  -2  -6   8 12669.9 1112.00   2
  -2  -6   8 11236.6 733.103   3
   2   6  -8 12831.9 1037.28   2
   2   6  -8 12542.3 748.133   3
   2   6  -7 24971.7 1054.03   3
  -2  -6   7 23880.8 1065.65   3
   2   6  -7 26245.2 1467.66   2
  -2  -6   7 25167.5 1468.59   2
   2   6  -6 12206.4 741.779   3
   2   6  -6 11707.5 939.310   2
  -2  -6   6 12144.3 964.368   2
  -2  -6   6 10673.2 716.458   3
   2   6  -5 847.356 169.367   3
  -2  -6   5 793.378 191.260   3
   2   6  -5 975.136 269.789   2
  -2  -6   5 870.393 234.616   2
  -2  -6   4 62222.0 2076.44   2
  -2  -6   4 64700.1 1916.76   3
   2   6  -4 63710.8 1860.49   3
   2   6  -4 61042.6 2030.69   2
  -2  -6   3 653.622 195.078   3
   2   6  -3 1127.52 257.359   3
  -2  -6   3 746.016 206.565   2
  -2  -6   2 12460.8 883.603   3
  -2  -6   2 13048.8 985.570   2
  -2  -6   1 5867.17 633.960   3
  -2  -6   1 6589.71 708.466   2
   2   6   0 28717.3 1593.10   1
  -2  -6   0 28956.8 1503.72   3
  -2  -6  -1 874.162 251.818   3
   2   6   1 847.912 281.551   1
   2   6   2 7775.92 845.954   1
  -2  -6  -2 8153.73 859.700   3
  -2  -6  -3 726.017 261.403   3
   2   6   3 442.656 226.403   1
  -2  -6  -4 5850.20 781.589   3
   2   6   4 5422.95 767.879   1
   2   6   5 73.0297 115.125   1
  -2  -6  -5 334.804 206.163   3
  -2  -6  -5 24.3987 200.083   1
  -2  -6  -6-22.4026 202.222   1
  -2  -6  -6 200.081 227.240   3
   2   6   6-1.03077 129.712   1
   2   6   7 362.805 152.584   1
   2   6   8 47115.7 2600.81   1
   2   6   9 19607.5 1744.39   1
   2   6  10 30660.2 2204.85   1
   2   6  11 447.532 285.242   1
   2   6  12 156.405 156.801   1
   2   6  13-303.027 318.553   1
   2   6  14 204.448 181.522   1
   2   6  15 315.311 346.542   1
   2   6  16-191.250 183.027   1
  -2  -7  20 629.397 421.085   2
  -2  -7  19 485.235 350.366   2
  -2  -7  18 106.846 315.628   2
  -2  -7  17 460.162 251.762   2
  -2  -7  16-248.571 237.227   2
  -2  -7  15 3485.54 748.475   2
  -2  -7  14 4951.26 829.418   2
   2   7 -14 50.3741 74.4618   3
   2   7 -13 4436.88 542.891   3
  -2  -7  13 5259.66 817.527   2
   2   7 -12 58.2471 66.7590   3
  -2  -7  12-68.2248 151.180   2
   2   7 -11 6726.98 627.956   3
  -2  -7  11 6853.12 955.002   2
   2   7 -10 2700.68 382.126   3
  -2  -7  10 2013.27 477.083   2
   2   7 -10 1708.49 392.721   2
  -2  -7   9 3296.48 446.543   3
   2   7  -9 4163.50 621.913   2
   2   7  -9 3919.95 474.562   3
  -2  -7   9 3838.29 664.231   2
   2   7  -8 5887.10 564.372   3
  -2  -7   8 5279.75 554.238   3
   2   7  -8 5793.91 721.351   2
  -2  -7   8 6234.31 801.558   2
   2   7  -7 13511.1 842.653   3
   2   7  -7 13442.1 1067.93   2
  -2  -7   7 11884.9 840.757   3
  -2  -7   7 13329.6 1073.98   2
   2   7  -6 11076.0 783.687   3
  -2  -7   6 9905.64 777.888   3
  -2  -7   6 10779.1 942.269   2
   2   7  -6 11330.2 953.930   2
  -2  -7   5-174.364 111.888   2
  -2  -7   5 37.1343 116.608   3
   2   7  -5-14.6944 83.8100   3
   2   7  -5 109.697 85.2565   2
  -2  -7   4 14951.6 1023.77   3
   2   7  -4 14502.7 979.567   3
   2   7  -4 14288.4 1022.14   2
  -2  -7   4 14696.7 1052.23   2
   2   7  -3 17511.7 1139.30   3
  -2  -7   3 16416.5 1093.71   3
  -2  -7   3 16390.5 1149.26   2
  -2  -7   2 8259.56 789.216   3
   2   7  -2 8208.54 819.370   3
  -2  -7   2 9138.08 860.417   2
  -2  -7   1 6551.78 737.296   2
  -2  -7   1 5873.39 683.439   3
  -2  -7   0 1201.14 324.929   3
   2   7   0 1143.76 330.117   1
  -2  -7   0 1452.95 361.171   2
  -2  -7  -1 7054.69 819.094   3
   2   7   1 5651.80 747.324   1
   2   7   2 8648.72 953.525   1
  -2  -7  -2 8903.45 947.811   3
  -2  -7  -3 3639.89 612.426   3
   2   7   3 3483.66 603.105   1
  -2  -7  -4 47.3830 77.0679   3
  -2  -7  -4-111.595 220.483   1
   2   7   4 242.841 258.108   1
  -2  -7  -5 2265.75 563.148   3
   2   7   5 2161.64 506.940   1
   2   7   6 33201.8 2136.14   1
   2   7   7 25278.3 1897.01   1
   2   7   8 3835.86 761.734   1
   2   7   9 8449.89 1187.34   1
   2   7  10 339.890 285.853   1
   2   7  11 305.991 322.814   1
   2   7  12 2163.84 649.105   1
   2   7  13 243.833 134.614   1
   2   7  14-127.827 361.269   1
   2   7  15 2346.11 705.407   1
  -2  -8  20 652.540 366.808   2
  -2  -8  19 1007.48 414.811   2
  -2  -8  18 2745.53 734.301   2
  -2  -8  17 1195.86 481.409   2
  -2  -8  16 1966.05 563.222   2
  -2  -8  15 2046.20 535.511   2
   2   8 -14 2776.04 464.000   3
  -2  -8  14 8233.95 1084.64   2
   2   8 -13-36.3261 47.7126   3
  -2  -8  13-72.2723 210.548   2
   2   8 -12-7.95473 124.471   3
  -2  -8  12 280.863 250.438   2
  -2  -8  11 20790.5 1638.65   2
   2   8 -11 19617.9 1162.09   3
  -2  -8  10 1678.07 505.813   2
   2   8 -10 1845.03 356.546   3
   2   8 -10 1012.61 327.328   2
   2   8  -9 20757.1 1151.37   3
  -2  -8   9 21369.2 1528.20   2
  -2  -8   9 19888.6 1173.89   3
   2   8  -9 22045.8 1492.62   2
   2   8  -8 13547.9 923.743   3
  -2  -8   8 11831.6 914.520   3
   2   8  -8 13687.3 1138.33   2
  -2  -8   8 15848.8 1275.71   2
   2   8  -7 23629.7 1232.84   3
   2   8  -7 24261.6 1483.41   2
  -2  -8   7 23107.0 1447.47   2
  -2  -8   7 20247.8 1198.73   3
  -2  -8   6 198.884 77.9167   3
   2   8  -6 400.902 158.660   3
   2   8  -6 319.373 87.0738   2
  -2  -8   5-49.4154 136.881   2
   2   8  -5 129.423 90.9071   3
  -2  -8   5 253.364 146.885   3
   2   8  -5-11.2671 83.9073   2
  -2  -8   4 2270.65 431.845   3
   2   8  -4 2341.70 444.803   3
  -2  -8   4 2175.90 421.375   2
   2   8  -3-32.4398 97.6460   3
  -2  -8   3-59.0054 155.338   2
  -2  -8   2 2347.90 474.394   3
  -2  -8   2 2580.54 487.799   2
  -2  -8   1 55609.0 2279.47   2
  -2  -8   1 48256.8 2119.90   3
  -2  -8   0 6534.77 809.239   2
  -2  -8   0 6048.52 763.214   3
   2   8   0 6538.19 836.470   1
  -2  -8  -1 3078.33 584.331   3
   2   8   1 3336.13 632.156   1
  -2  -8  -2 17.2302 79.5310   3
   2   8   2 307.710 188.974   1
  -2  -8  -3 6360.92 862.996   3
  -2  -8  -3 6135.37 913.287   1
   2   8   3 5293.52 784.800   1
   2   8   4 8577.55 1052.35   1
   2   8   5 859.518 372.116   1
   2   8   6 17074.4 1557.62   1
   2   8   7 15026.2 1522.80   1
   2   8   8 532.484 215.149   1
   2   8   9 598.643 320.947   1
   2   8  10 5499.57 1033.72   1
   2   8  11 2500.58 717.476   1
   2   8  12 55.5940 160.284   1
   2   8  13 34.0128 241.928   1
   2   8  14 23.2249 163.677   1
  -2  -9  20 2118.63 718.393   2
  -2  -9  19 88.2148 214.885   2
  -2  -9  18 3086.14 759.446   2
  -2  -9  17 558.534 366.108   2
  -2  -9  16-284.109 347.436   2
  -2  -9  15 449.863 284.594   2
  -2  -9  14 5152.66 839.518   2
  -2  -9  13 160.636 157.537   2
   2   9 -12 667.026 239.551   3
  -2  -9  12 22526.3 1780.99   2
  -2  -9  11 104.934 210.170   2
   2   9 -11-15.7178 59.5657   3
  -2  -9  10 1466.31 410.870   2
   2   9 -10 335.448 194.593   3
  -2  -9  10 1345.39 336.242   3
   2   9 -10 1919.14 495.166   2
  -2  -9   9 12.9356 198.395   2
  -2  -9   9 11.1470 80.5664   3
   2   9  -9 38.1387 123.824   2
   2   9  -9 55.2720 110.361   3
   2   9  -8 619.087 233.247   3
  -2  -9   8 1358.35 423.456   2
  -2  -9   8 913.098 264.822   3
   2   9  -8 1235.51 348.044   2
   2   9  -7 43.1832 64.5425   3
  -2  -9   7 197.233 175.064   3
  -2  -9   7 138.525 184.760   2
   2   9  -7 56.8062 89.6250   2
  -2  -9   6 3253.61 518.327   3
  -2  -9   6 2531.34 477.848   2
   2   9  -6 2932.41 492.513   2
  -2  -9   5 10314.7 1201.31   1
  -2  -9   5 10399.0 999.218   2
  -2  -9   5 9734.90 946.228   3
  -2  -9   4 13255.6 1134.20   3
  -2  -9   4 15453.9 1404.20   1
  -2  -9   4 14393.3 1149.39   2
  -2  -9   3 13546.7 1190.45   3
  -2  -9   3 14798.6 1405.32   1
  -2  -9   3 14263.4 1175.43   2
  -2  -9   2 855.366 319.694   1
  -2  -9   2 963.468 346.262   3
  -2  -9   2 381.985 124.175   2
  -2  -9   1 29876.5 1763.20   2
  -2  -9   1 25767.3 1660.59   3
  -2  -9   1 30127.6 2058.07   1
  -2  -9   0-45.4656 145.852   3
  -2  -9   0-168.078 204.724   2
  -2  -9   0 408.058 329.789   1
  -2  -9  -1 6056.41 838.778   3
  -2  -9  -1 7008.69 1004.29   1
   2   9   1 5933.51 850.231   1
  -2  -9  -2 640.094 258.058   3
   2   9   2 849.345 268.157   1
   2   9   3 18059.1 1534.42   1
   2   9   4 108.454 208.838   1
   2   9   5 14733.1 1464.78   1
   2   9   6 10327.2 1242.49   1
   2   9   7 429.493 184.181   1
   2   9   8-572.542 405.316   1
   2   9   9 4402.94 923.046   1
   2   9  10 4851.96 995.908   1
   2   9  11 728.214 415.800   1
   2   9  12 3093.64 842.174   1
   2   9  13 2367.02 729.743   1
   2   9  14-146.733 363.528   1
  -2 -10  20 1073.96 492.399   2
  -2 -10  19-191.244 309.270   2
  -2 -10  18 10859.9 1485.88   2
  -2 -10  17 10784.6 1450.38   2
  -2 -10  16 1574.19 518.479   2
  -2 -10  15 131.650 161.553   2
  -2 -10  14-14.7368 244.706   2
  -2 -10  13 3352.55 698.863   2
  -2 -10  12 4076.56 797.484   2
  -2 -10  11 680.678 282.390   2
  -2 -10  10 1897.64 476.005   2
  -2 -10  10 1651.40 385.155   3
  -2 -10   9 6953.30 919.982   2
  -2 -10   9 6085.86 752.534   3
   2  10  -9 7906.93 926.282   2
   2  10  -8 10047.3 1019.97   2
  -2 -10   8 11416.0 1042.63   3
  -2 -10   8 13778.1 1240.63   2
  -2 -10   7 2477.26 521.719   2
  -2 -10   7 1782.24 432.212   3
   2  10  -7 2497.67 477.023   2
  -2 -10   6 7758.94 882.534   3
   2  10  -6 8931.47 909.775   2
  -2 -10   6 9254.81 960.884   2
  -2 -10   5 3660.94 627.982   2
  -2 -10   5 3256.30 576.855   3
  -2 -10   4 1368.61 378.065   3
  -2 -10   4 1436.72 342.239   2
   2  10  -3 19807.0 1465.03   3
  -2 -10   3 20779.0 1589.62   3
  -2 -10   3 21180.9 1484.64   2
  -2 -10   2 546.971 261.859   3
   2  10  -2 261.452 220.009   3
  -2 -10   2 176.854 280.048   2
  -2 -10   1 4464.53 730.715   3
  -2 -10   1 4897.35 773.130   2
  -2 -10   0 27694.8 1848.72   3
  -2 -10   0 30862.7 1885.71   2
   2  10   1 4061.94 731.161   1
   2  10   2 854.927 401.791   1
   2  10   3 2933.66 646.594   1
   2  10   4 10983.8 1272.68   1
   2  10   5 2387.48 607.800   1
   2  10   6 19827.3 1785.04   1
   2  10   7 1071.61 401.715   1
   2  10   8 332.952 174.858   1
   2  10   9 5855.17 1079.35   1
   2  10  10 1258.09 578.622   1
   2  10  11 1145.04 525.886   1
   2  10  12 256.472 312.394   1
   2  10  13 1210.83 539.014   1
  -2 -11  20 73.7835 242.297   2
  -2 -11  19 309.245 351.951   2
  -2 -11  18-371.628 421.359   2
  -2 -11  17 6092.55 1117.52   2
  -2 -11  16-78.5411 273.051   2
   2  11 -15 4104.35 620.330   3
  -2 -11  15 2057.43 597.534   2
  -2 -11  14 666.092 400.775   2
   2  11 -14 522.000 274.240   3
  -2 -11  13-43.1528 154.273   2
  -2 -11  12 1951.20 567.861   2
  -2 -11  11 1479.57 442.035   2
  -2 -11  11 685.154 297.257   3
  -2 -11  10 2805.38 621.084   2
  -2 -11  10 1915.87 442.243   3
  -2 -11   9 3342.72 641.045   2
  -2 -11   9 1949.41 463.013   3
   2  11  -9 2995.64 570.501   2
  -2 -11   8 5014.02 736.206   3
   2  11  -8 6560.66 831.804   2
  -2 -11   8 7058.14 905.651   2
  -2 -11   7 8947.97 989.839   3
   2  11  -7 10332.4 1024.62   3
   2  11  -7 9837.42 1002.38   2
  -2 -11   7 9739.53 1042.07   2
   2  11  -6 8217.99 912.943   3
  -2 -11   6 7007.44 893.929   3
  -2 -11   6 8639.46 953.300   2
  -2 -11   5 433.593 176.163   2
  -2 -11   5 433.830 210.365   3
   2  11  -5 565.927 325.290   3
  -2 -11   4 3180.35 619.152   3
   2  11  -4 3678.48 662.928   3
  -2 -11   4 3350.24 568.151   2
  -2 -11   3-116.123 178.376   3
  -2 -11   3 212.532 218.666   2
   2  11  -3-145.857 278.808   3
   2  11  -2 1870.71 407.248   3
  -2 -11   2 2394.83 567.694   3
  -2 -11   2 2416.53 508.498   2
  -2 -11   1-34.5272 225.509   2
  -2 -11   0 39852.9 2233.87   2
   2  11   1 2480.31 708.682   1
  -2 -11  -1 2398.60 504.080   2
   2  11   2 6266.36 942.464   1
   2  11   3 265.006 171.026   1
   2  11   4 3182.86 721.570   1
   2  11   5 157.961 210.721   1
   2  11   6 275.397 281.943   1
   2  11   7 271.114 297.061   1
   2  11   8 4771.54 982.681   1
   2  11   9 627.907 401.636   1
   2  11  10 879.707 434.941   1
   2  11  11-284.090 322.892   1
   2  11  12 2729.10 837.400   1
  -2 -12  19-98.1724 348.447   2
  -2 -12  18 2251.64 720.198   2
  -2 -12  17-177.527 131.042   2
  -2 -12  16 21.1801 170.881   2
  -2 -12  15 1221.69 450.612   2
   2  12 -14-107.817 224.148   3
  -2 -12  14 105.779 123.247   2
  -2 -12  13-138.715 242.171   2
   2  12 -13-3.25471 147.215   3
  -2 -12  12 717.910 388.892   2
   2  12 -12 262.390 134.773   3
   2  12 -11 396.206 178.321   3
  -2 -12  11 246.190 229.429   2
  -2 -12  11-24.4540 193.871   3
  -2 -12  10 292.203 181.252   3
   2  12 -10-55.1563 79.0679   3
  -2 -12  10-165.482 188.562   2
  -2 -12   9 282.134 219.233   2
  -2 -12   9 144.142 136.958   3
   2  12  -9 295.644 213.045   3
   2  12  -8 2623.51 526.799   3
   2  12  -8 2435.42 526.722   2
  -2 -12   8 1877.15 457.098   2
  -2 -12   8 2199.05 535.650   3
  -2 -12   7 6728.98 917.410   3
   2  12  -7 8459.90 966.152   3
  -2 -12   7 8571.91 1000.15   2
  -2 -12   6 1532.46 395.289   2
   2  12  -6 1712.10 464.112   3
  -2 -12   6 1402.34 424.440   3
  -2 -12   5 536.175 321.110   2
  -2 -12   5 555.577 353.265   3
   2  12  -4 36962.5 2249.22   3
  -2 -12   4 30362.9 2066.33   3
  -2 -12   4 34909.3 2019.57   2
  -2 -12   3 29952.3 1923.27   2
   2  12  -3 25045.2 1801.33   3
   2  12  -2 233.710 199.081   3
  -2 -12   2 484.121 247.961   2
  -2 -12   1 528.900 342.630   2
  -2 -12   0 8577.67 1057.15   2
  -2 -12  -1 706.640 328.687   2
   2  12   2 887.766 388.178   1
   2  12   3 6389.09 1072.03   1
   2  12   4 12222.7 1427.73   1
   2  12   5 2665.70 678.165   1
   2  12   6-104.075 273.233   1
   2  12   7 1089.77 483.176   1
   2  12   8-110.578 135.266   1
   2  12   9 63.9786 167.690   1
   2  12  10 365.089 375.806   1
   2  12  11 480.336 467.826   1
  -2 -13  19-141.890 297.334   2
  -2 -13  18 2554.01 752.371   2
  -2 -13  17-16.7095 127.840   2
  -2 -13  16 2010.39 635.415   2
  -2 -13  15-299.359 266.116   2
  -2 -13  14 4.17551 100.053   2
  -2 -13  13 361.956 251.577   2
   2  13 -13 540.863 224.953   3
   2  13 -12 1638.28 404.660   3
  -2 -13  12 1675.13 528.663   2
   2  13 -11 1257.66 351.788   3
  -2 -13  11 1189.21 397.040   2
   2  13 -10 148.085 115.885   3
  -2 -13  10 239.932 213.587   2
   2  13  -9 323.610 230.896   3
  -2 -13   9 373.030 275.375   2
  -2 -13   9 371.687 294.657   3
   2  13  -8 4380.07 723.297   3
  -2 -13   8 3732.20 750.124   3
  -2 -13   8 3239.61 667.443   2
   2  13  -7 3485.50 661.709   3
  -2 -13   7 2649.75 574.012   2
  -2 -13   6 980.815 291.965   2
   2  13  -6 1894.19 598.300   3
   2  13  -5 4936.36 848.227   3
  -2 -13   5 4102.97 723.361   2
   2  13  -4 3640.34 718.893   3
  -2 -13   4 2781.13 593.092   2
   2  13  -3 175.168 342.975   3
  -2 -13   3 93.4249 173.629   2
  -2 -13   2 7782.32 1072.51   2
  -2 -13   1 7856.33 1080.13   2
  -2 -13   0 2143.32 557.683   2
  -2 -13  -1-16.8885 200.377   2
   2  13   2 2866.94 737.170   1
  -2 -13  -2 2293.77 578.800   2
   2  13   3 504.020 363.829   1
   2  13   4 516.502 347.212   1
   2  13   5 2574.41 660.877   1
   2  13   6 482.699 382.321   1
   2  13   7 174.568 169.160   1
   2  13   8 658.153 375.010   1
   2  13   9 5158.43 1061.10   1
   2  13  10 476.818 355.835   1
  -2 -14  18 29.1707 182.870   2
  -2 -14  17 514.445 391.115   2
  -2 -14  16 1703.18 630.203   2
  -2 -14  15-170.082 214.487   2
  -2 -14  14 1921.30 568.450   2
   2  14 -13 1930.49 485.610   3
  -2 -14  13 1129.19 389.614   2
  -2 -14  12-59.5844 142.383   2
   2  14 -12-4.97620 125.831   3
   2  14 -11 10.1615 131.961   3
  -2 -14  11-77.6635 149.982   2
  -2 -14  10 174.933 215.489   2
   2  14 -10 207.516 93.0527   3
  -2 -14   9 3774.27 752.855   2
   2  14  -9 3406.13 653.933   3
   2  14  -8 4572.20 751.147   3
  -2 -14   8 5499.06 876.924   2
  -2 -14   7 474.534 189.383   2
   2  14  -7 1281.30 465.037   3
   2  14  -6 1535.26 486.308   3
  -2 -14   6 613.471 288.178   2
   2  14  -5 1962.74 617.216   3
  -2 -14   5 620.624 369.385   2
  -2 -14   4 3186.96 652.717   2
   2  14  -4 4236.78 795.292   3
   2  14  -3 2809.10 719.236   3
  -2 -14   3 1171.58 561.795   2
  -2 -14   2 5365.31 947.631   2
  -2 -14   1 3047.15 681.295   2
  -2 -14   0 673.744 369.632   2
  -2 -14  -1 6102.47 999.789   2
  -2 -14  -2 2161.99 608.779   2
  -2 -14  -3 252.234 203.577   2
   2  14   3 66.9182 234.995   1
   2  14   4 5855.67 1059.69   1
   2  14   5-146.438 234.402   1
   2  14   6 1280.97 452.938   1
   2  14   7-94.2008 249.582   1
   2  14   8-168.102 177.184   1
  -2 -15  16 292.285 342.112   2
  -2 -15  15 293.060 225.413   2
  -2 -15  14 1007.70 413.095   2
  -2 -15  13-564.586 326.637   2
  -2 -15  12 78.6484 147.826   2
   2  15 -12 165.263 112.033   3
  -2 -15  11 75.8540 112.073   2
   2  15 -11 53.8446 98.0264   3
   2  15 -10 1686.77 490.508   3
  -2 -15  10 1729.71 584.840   2
  -2 -15   9 193.313 238.443   2
   2  15  -9-73.0211 113.221   3
   2  15  -8 676.651 380.773   3
  -2 -15   8 696.187 354.044   2
   2  15  -7 4622.27 831.484   3
  -2 -15   7 3524.17 703.622   2
   2  15  -6 2915.78 706.790   3
  -2 -15   6 1941.97 533.517   2
   2  15  -5 1554.70 510.857   3
  -2 -15   5 623.625 276.245   2
  -2 -15   4-57.7379 177.580   2
   2  15  -4 221.639 271.684   3
  -2 -15   3 295.871 184.583   2
  -2 -15   2 163.441 160.190   2
  -2 -15   1 556.672 389.392   2
  -2 -15   0 621.366 382.514   2
  -2 -15  -1 813.879 404.273   2
  -2 -15  -2 646.202 330.016   2
  -2 -15  -3 592.684 399.530   2
  -2 -15  -4 1790.93 607.835   2
   2  15   4 1762.38 587.904   1
   2  15   5-512.417 421.918   1
   2  15   6 4266.28 998.010   1
   2  15   7-94.9799 126.872   1
  -2 -16  12 301.157 203.538   2
  -2 -16  11 756.945 322.611   2
   2  16 -11 355.200 157.213   3
  -2 -16  10 177.784 305.928   2
   2  16 -10 148.122 167.984   3
  -2 -16   9 10799.6 1323.13   2
   2  16  -9 11062.1 1291.84   3
  -2 -16   8 46.1878 190.152   2
   2  16  -8 20.8076 162.401   3
   2  16  -7 36.4014 156.498   3
  -2 -16   7 154.718 197.569   2
   2  16  -6 445.064 236.541   3
  -2 -16   6 234.427 164.638   2
  -2 -16   5 212.818 108.227   2
   2  16  -5 410.872 231.759   3
  -2 -16   4 567.704 353.592   2
   2  16  -4 1221.27 495.878   3
  -2 -16   3 285.519 160.132   2
  -2 -16   2-230.768 218.438   2
  -2 -16   1 522.682 332.978   2
  -2 -16   0 3354.53 790.978   2
  -2 -16  -1 3136.41 768.274   2
  -2 -16  -2 620.921 548.734   2
  -2 -16  -3-76.3522 180.158   2
  -2 -16  -4-145.056 305.770   2
  -2 -16  -5 68.1689 327.198   2
   2  16   5 2.96458 185.615   1
   2  17 -10 2948.17 700.924   3
   2  17  -9 1021.23 474.539   3
   2  17  -8 3391.25 793.216   3
  -2 -17   7 283.437 359.467   2
   2  17  -7 70.9418 255.075   3
   2  17  -6 1791.33 540.793   3
  -2 -17   6 2184.59 572.659   2
   2  17  -5 386.223 309.407   3
  -2 -17   5 247.233 263.911   2
  -2 -17   4 656.608 330.459   2
  -2 -17   3 1993.37 530.231   2
  -2 -17   2 237.313 210.237   2
  -2 -17   1 94.4427 129.793   2
  -2 -17   0 494.845 247.766   2
  -2 -17  -1 1110.89 490.607   2
  -2 -17  -2-254.467 294.064   2
  -2 -17  -3 1968.11 695.041   2
  -2 -17  -4-503.467 407.236   2
  -2 -17  -5 1440.11 556.755   2
  -2 -17  -6 895.223 519.724   2
   2  18  -9 3607.12 851.748   3
   2  18  -8 369.314 298.104   3
   2  18  -7 1914.82 552.508   3
   2  18  -6 150.116 219.327   3
   2  19  -8 1026.25 470.608   3
   2  19  -7 134.647 238.203   3
  -3  19   8-127.933 301.240   1
  -3  19   7 1899.11 634.284   1
  -3  19   6 815.379 471.230   1
  -3  19   3-546.711 370.209   3
  -3  19   2-258.192 146.931   3
  -3  19   1 990.145 490.840   3
  -3  19   0 255.407 212.737   3
  -3  19  -1 2080.10 629.926   3
  -3  19  -2 871.031 356.190   3
  -3  19  -3 1124.56 477.215   3
  -3  19  -4 4132.65 935.224   3
  -3  19  -5 1145.40 535.710   3
  -3  19  -6 39.7259 216.763   3
  -3  19  -7-179.689 240.597   3
  -3  19  -8-289.489 299.182   3
  -3  19  -9 752.434 470.729   3
  -3  19 -10 3449.11 864.230   3
  -3  18  10 281.215 145.274   1
  -3  18   9 180.233 162.839   1
  -3  18   8 267.577 153.962   1
  -3  18   7 624.116 416.655   1
  -3  18   6 293.727 184.761   3
  -3  18   6 478.742 283.877   1
  -3  18   5 3700.33 985.633   3
  -3  18   5 2740.28 665.666   1
  -3  18   4 130.424 309.601   3
  -3  18   3 704.137 440.676   3
  -3  18   2-110.546 255.842   3
  -3  18   1 2391.90 683.294   3
  -3  18   0 916.758 456.331   3
  -3  18  -1 71.6991 240.720   3
  -3  18  -2 1227.21 465.192   3
  -3  18  -3-120.681 223.974   3
  -3  18  -4 966.873 392.619   3
  -3  18  -5-172.909 122.677   3
  -3  18  -6-100.379 171.330   3
  -3  18  -7 8413.05 1321.22   3
  -3  18  -8 1314.09 561.722   3
  -3  18  -9 1075.57 473.005   3
  -3  18 -10 155.183 251.913   3
  -3  18 -11 1042.96 482.179   3
  -3  18 -12 118.767 164.548   3
  -3  17  11 314.159 226.280   1
  -3  17  10 1444.90 613.456   1
  -3  17   9 304.431 283.831   1
  -3  17   8 102.290 296.886   1
  -3  17   7 382.175 344.451   3
  -3  17   7-23.6639 171.460   1
  -3  17   6 2110.10 597.122   1
  -3  17   6 1831.56 656.176   3
  -3  17   5 242.462 304.089   3
  -3  17   5-32.7661 138.153   1
  -3  17   4-144.060 188.184   3
  -3  17   3 1341.46 520.922   3
  -3  17   2 234.286 194.041   3
  -3  17   1 3329.44 738.753   3
  -3  17   0 6488.75 1057.87   3
  -3  17  -1 1751.47 630.244   3
  -3  17  -2-38.1786 243.858   3
  -3  17  -3 1137.02 478.914   3
  -3  17  -4 2.28696 215.559   3
  -3  17  -5-67.0295 225.800   3
  -3  17  -6 97.2017 212.389   3
  -3  17  -7 14681.9 1727.03   3
  -3  17  -8 6346.00 1146.03   3
  -3  17  -9 194.686 149.835   3
  -3  17 -10 263.094 118.776   3
  -3  17 -11-50.3405 223.103   3
  -3  17 -12 109.206 155.505   3
  -3  17 -13 207.003 308.638   3
  -3  17 -14 308.016 210.602   3
  -3  16  12 182.105 144.813   1
  -3  16  11 916.273 464.863   1
  -3  16  10 847.851 410.746   1
  -3  16   9 961.276 446.840   1
  -3  16   8 334.127 339.545   3
  -3  16   8 417.137 319.691   1
  -3  16   7 706.736 397.443   3
  -3  16   7 215.588 161.036   1
  -3  16   6 4239.52 950.537   3
  -3  16   6 2960.24 637.808   1
  -3  16   5 711.927 356.042   3
  -3  16   5 1208.93 411.228   1
  -3  16   4 535.583 425.033   3
  -3  16   4-47.9793 104.836   1
  -3  16   3 1687.57 601.013   3
  -3  16   2 2518.33 667.676   3
  -3  16   1 732.940 388.533   3
  -3  16   0 2114.27 558.280   3
  -3  16  -1 2069.45 583.239   3
  -3  16  -2 3529.81 761.618   3
  -3  16  -3 1074.36 413.314   3
  -3  16  -4 5934.13 1019.75   3
  -3  16  -5 978.264 482.383   3
  -3  16  -6 5013.85 968.380   3
  -3  16  -7 18298.8 1894.23   3
  -3  16  -8 1697.24 634.300   3
  -3  16  -9 3526.21 765.498   3
  -3  16 -10 1091.84 387.203   3
  -3  16 -11 3296.81 828.831   3
  -3  16 -12 21.6503 246.869   3
  -3  16 -13 1098.07 492.143   3
  -3  16 -14 267.361 391.217   3
  -3  16 -15 1012.70 535.524   3
  -3  15  13 2340.04 802.035   1
  -3  15  12 324.043 245.677   1
  -3  15  11 269.739 238.778   1
  -3  15  10-347.547 262.707   1
  -3  15   9 266.287 233.858   1
  -3  15   8 1213.89 533.452   3
  -3  15   8 693.123 322.663   1
  -3  15   7 169.799 115.772   1
  -3  15   7-30.9057 204.003   3
  -3  15   6 7999.60 1076.68   1
  -3  15   6 9311.57 1325.95   3
  -3  15   5 806.154 552.384   3
  -3  15   5 345.983 281.454   1
  -3  15   4 1116.63 449.607   3
  -3  15   4 1610.36 454.610   1
  -3  15   3 2652.25 659.508   3
  -3  15   3 2477.31 566.034   1
   3 -15  -3 2761.79 643.782   1
   3 -15  -3 2608.86 352.318   2
   3 -15  -2 8560.30 1108.34   1
  -3  15   2 7235.46 1066.96   3
   3 -15  -1 15315.2 1464.00   1
  -3  15   1 13288.6 1482.52   3
  -3  15   0 5336.29 945.048   3
   3 -15   0 4796.16 820.571   1
  -3  15  -1 97.5566 117.267   3
   3 -15   1-203.850 231.689   1
   3 -15   2 3723.64 688.030   1
  -3  15  -2 2464.59 632.623   3
  -3  15  -3 4423.90 851.986   3
   3 -15   3 6635.86 933.928   1
  -3  15  -4 6929.76 1078.97   3
   3 -15   4 9680.56 1183.63   1
   3 -15   5 13799.5 1334.24   1
  -3  15  -5 10441.1 1369.11   3
  -3  15  -6 7695.74 1202.27   3
   3 -15   6 8780.17 1080.73   1
  -3  15  -7 4935.51 942.612   3
  -3  15  -8 760.800 365.928   3
  -3  15  -9 2349.88 529.173   3
  -3  15 -10 1449.14 457.763   3
  -3  15 -11 1851.15 616.771   3
  -3  15 -12 719.862 395.131   3
  -3  15 -13 2604.07 730.052   3
  -3  15 -14 150.409 257.640   3
  -3  15 -15 558.432 255.436   3
  -3  15 -16 5751.75 1179.25   3
  -3  14  14 2808.60 812.317   1
  -3  14  13 1597.48 645.726   1
  -3  14  12 212.577 286.432   1
  -3  14  11 835.271 436.627   1
  -3  14  10-79.8491 157.253   1
  -3  14   9-50.5661 293.843   1
  -3  14   8 1406.92 487.539   1
  -3  14   8 1587.72 568.914   3
  -3  14   7 2903.21 762.419   3
  -3  14   7 2876.20 666.179   1
  -3  14   6 582.141 360.542   3
  -3  14   6 722.809 319.544   1
  -3  14   5-107.933 212.396   1
  -3  14   5 380.152 307.687   3
   3 -14  -5 130.484 127.847   2
  -3  14   4 5544.85 962.543   3
  -3  14   4 4610.06 737.029   1
   3 -14  -4 4530.03 538.447   2
   3 -14  -4 6557.53 958.442   1
   3 -14  -3 1052.75 219.475   2
   3 -14  -3 1646.41 475.054   1
  -3  14   3 1639.26 463.377   1
  -3  14   3 2579.16 715.948   3
  -3  14   2 2436.39 655.487   3
   3 -14  -2 2073.54 514.993   1
   3 -14  -1 6342.74 891.330   1
  -3  14   1 6766.53 990.723   3
  -3  14   0 2153.81 784.570   3
  -3  14  -1 19942.3 1698.28   3
  -3  14  -2 11785.2 1290.95   3
  -3  14  -3 81.0815 211.028   3
  -3  14  -4 206.724 209.439   3
  -3  14  -5 6532.32 1039.35   3
   3 -14   6 962.029 355.164   1
  -3  14  -6 247.551 311.960   3
  -3  14  -7 1378.86 495.800   3
   3 -14   7 956.138 278.611   1
   3 -14   8 1076.03 367.995   1
  -3  14  -8 1460.94 536.150   3
  -3  14  -9 1380.22 434.186   3
  -3  14 -10 314.301 297.542   3
  -3  14 -11 1050.83 498.038   3
  -3  14 -12-105.376 163.433   3
  -3  14 -13 237.219 155.317   3
  -3  14 -14 230.897 189.164   3
  -3  14 -15 812.188 365.562   3
  -3  14 -16 2920.92 788.964   3
  -3  14 -17-109.108 275.545   3
  -3  13  15 2726.06 796.063   1
  -3  13  14 4788.57 1037.03   1
  -3  13  13 1317.49 579.156   1
  -3  13  12 1515.78 527.775   1
  -3  13  11-76.2892 159.203   1
  -3  13  10 364.994 164.864   1
  -3  13   9 742.345 360.977   1
  -3  13   8 4317.77 793.020   1
   3 -13  -8 6268.81 980.777   2
  -3  13   8 5198.33 968.134   3
  -3  13   7 3681.09 713.241   1
  -3  13   7 4110.27 836.114   3
  -3  13   6 7455.58 960.725   1
  -3  13   6 7052.19 1096.86   3
   3 -13  -6 9698.80 1198.60   1
  -3  13   5 1216.14 460.565   3
   3 -13  -5 941.758 391.677   1
   3 -13  -5 895.195 280.286   2
  -3  13   5 866.768 308.836   1
   3 -13  -4 2291.64 382.825   2
  -3  13   4 3142.60 670.127   3
  -3  13   4 2255.06 482.678   1
   3 -13  -4 2242.07 505.414   1
  -3  13   3 1037.08 433.153   3
   3 -13  -3 551.136 169.227   2
   3 -13  -3 307.466 209.003   1
  -3  13   3 988.522 374.827   1
  -3  13   2 860.344 294.622   3
   3 -13  -2 567.893 108.797   2
   3 -13  -2 490.702 113.203   2
  -3  13   1 336.825 350.341   3
  -3  13   0 201.543 279.304   3
   3 -13   1 389.477 250.866   1
  -3  13  -1 6961.64 994.787   3
   3 -13   2 334.450 262.406   1
  -3  13  -2 7272.41 1012.55   3
   3 -13   3 994.176 368.974   1
  -3  13  -3 14822.0 1470.57   3
  -3  13  -4 4695.42 980.550   3
  -3  13  -5 4273.44 766.561   3
  -3  13  -6 955.798 365.655   3
  -3  13  -7 644.832 314.606   3
  -3  13  -7 430.273 99.6552   2
  -3  13  -8 5521.04 444.921   2
  -3  13  -8 6574.53 1049.47   3
  -3  13  -9 10164.5 1304.06   3
  -3  13 -10 3741.52 856.023   3
  -3  13 -11 2040.77 646.144   3
  -3  13 -12 634.619 305.816   3
  -3  13 -13 365.282 222.418   3
  -3  13 -14 510.691 395.536   3
  -3  13 -15 383.475 267.397   3
  -3  13 -16 448.099 436.229   3
   3 -13  16 117.032 249.076   1
   3 -13  17 270.875 292.551   1
  -3  13 -17-204.916 342.940   3
  -3  12  16 0.99970 138.952   1
  -3  12  15 43.9634 360.220   1
  -3  12  14 2464.30 753.733   1
  -3  12  13 1890.18 689.550   1
  -3  12  12 3103.30 742.585   1
  -3  12  11 985.600 462.986   1
  -3  12  10 907.677 426.342   1
   3 -12  -9 1467.31 508.096   2
  -3  12   9 1602.60 464.852   1
  -3  12   8 1732.83 560.981   3
   3 -12  -8 2147.81 537.913   2
  -3  12   8 1656.91 493.281   1
   3 -12  -7-73.8863 262.735   1
  -3  12   7-202.571 262.380   3
  -3  12   7-35.2510 163.280   1
   3 -12  -6 1433.63 425.230   1
  -3  12   6 1350.58 413.613   1
   3 -12  -6 199.135 204.313   2
  -3  12   6 1583.68 562.736   3
   3 -12  -5 2999.62 503.906   2
   3 -12  -5 3208.61 610.098   1
  -3  12   5 3112.83 724.552   3
  -3  12   5 3305.73 585.034   1
   3 -12  -4 7571.19 690.202   2
  -3  12   4 8915.56 962.251   1
   3 -12  -4 7876.29 920.235   1
  -3  12   4 9946.97 1172.11   3
  -3  12   3 9759.46 1155.53   3
  -3  12   3 9142.31 905.752   1
   3 -12  -3 6463.64 531.703   2
  -3  12   2 14758.9 1379.75   3
  -3  12   2 14183.3 1094.39   1
   3 -12  -1 3506.52 575.583   1
  -3  12   1 18083.3 1516.15   3
  -3  12   0 5730.18 869.616   3
   3 -12   0 3468.76 579.954   1
   3 -12   1 9309.72 911.921   1
  -3  12  -1 9402.05 1155.14   3
  -3  12  -2 17913.1 1662.94   3
   3 -12   2 16476.0 1244.96   1
  -3  12  -3 6229.71 916.221   3
   3 -12   3 2980.32 767.155   1
   3 -12   4 13594.6 1100.68   1
  -3  12  -4 15405.4 1446.28   3
  -3  12  -5 6318.23 993.344   3
   3 -12   5 2246.70 474.011   1
  -3  12  -6 15225.9 1490.56   3
  -3  12  -7 7959.58 1100.24   3
  -3  12  -7 7225.60 473.441   2
  -3  12  -8 8946.70 1221.64   3
  -3  12  -8 8417.58 597.790   2
  -3  12  -9 12185.0 1401.56   3
  -3  12  -9 11441.7 795.220   2
  -3  12 -10 1104.74 284.988   2
  -3  12 -10 1043.13 387.327   3
  -3  12 -11 2075.74 587.944   3
  -3  12 -12-73.5364 231.683   3
  -3  12 -13 2339.26 677.123   3
  -3  12 -14 423.597 324.233   3
  -3  12 -15 2960.76 793.899   3
  -3  12 -16 506.683 424.164   3
   3 -12  16 346.368 307.582   1
   3 -12  17 2921.97 820.527   1
  -3  12 -17 2633.48 823.010   3
  -3  12 -18 1361.25 410.118   3
   3 -12  18 1835.61 655.773   1
  -3  11  16 1368.13 554.753   1
  -3  11  15-66.2856 185.070   1
  -3  11  14 1381.99 515.209   1
  -3  11  13 196.914 343.929   1
  -3  11  12 2499.97 633.349   1
  -3  11  11 122.048 109.894   1
  -3  11  10 3895.35 744.301   1
   3 -11  -9 316.411 291.888   2
  -3  11   9-1.13804 156.209   1
  -3  11   8 575.175 215.709   3
  -3  11   8 457.365 311.837   1
   3 -11  -8 310.147 192.306   2
   3 -11  -7 366.872 270.316   1
  -3  11   7 1093.15 386.944   1
  -3  11   7 669.524 326.196   3
  -3  11   6 230.014 232.614   3
   3 -11  -6 223.197 160.618   1
   3 -11  -6 21.7259 111.528   2
  -3  11   6 212.628 175.295   1
  -3  11   5 6132.84 881.746   3
   3 -11  -5 4737.53 620.260   2
  -3  11   5 5708.17 757.421   1
  -3  11   4 512.700 227.992   3
  -3  11   4 1252.61 380.804   1
   3 -11  -4 730.753 216.391   2
  -3  11   3 408.839 223.988   3
   3 -11  -3 486.357 150.932   2
   3 -11  -3-41.9766 65.6394   1
  -3  11   3 741.940 253.261   1
   3 -11  -2 22.3650 23.2638   2
   3 -11  -2 101.112 150.006   1
  -3  11   2 138.375 187.946   1
  -3  11   2-131.800 171.896   3
  -3  11   1 2302.12 481.454   3
   3 -11  -1 2784.40 442.690   1
  -3  11   0 4999.19 752.527   3
   3 -11   0 5636.68 630.865   1
   3 -11   1 9647.08 866.352   1
  -3  11  -1 8467.91 1020.04   3
  -3  11  -2 5195.53 810.896   3
   3 -11   2 6605.45 753.154   1
   3 -11   3 4199.17 596.826   1
  -3  11  -3 3106.44 584.570   3
  -3  11  -4 7953.30 985.258   3
   3 -11   4 6561.43 724.954   1
  -3  11  -5 174.532 166.985   3
   3 -11   5 76.4976 176.343   1
  -3  11  -6 923.039 340.146   3
  -3  11  -6 797.534 142.844   2
  -3  11  -7 801.224 168.790   2
  -3  11  -7 630.128 398.449   3
  -3  11  -8 108.113 90.6643   2
  -3  11  -8-103.069 188.702   3
  -3  11  -9 2622.84 659.483   3
  -3  11  -9 2556.57 411.783   2
  -3  11 -10 24588.3 2013.78   3
  -3  11 -10 24749.4 1377.30   2
  -3  11 -11-133.994 187.343   2
  -3  11 -11 327.034 179.564   3
  -3  11 -12 2405.52 641.563   3
  -3  11 -13 5170.66 1006.73   3
  -3  11 -14-118.710 222.442   3
  -3  11 -15 1912.33 563.269   3
   3 -11  15 837.271 382.481   1
  -3  11 -16 692.994 317.930   3
   3 -11  16 1136.30 518.034   1
  -3  11 -17 3564.11 914.716   3
   3 -11  17 2402.17 708.571   1
  -3  11 -18 859.375 416.602   3
   3 -11  18 103.498 171.027   1
  -3  10  17 689.827 400.811   1
  -3  10  16 1317.55 505.477   1
  -3  10  15 1921.01 610.738   1
  -3  10  14 2222.27 648.514   1
  -3  10  13 8752.88 1222.70   1
  -3  10  12 302.707 351.796   1
  -3  10  11 664.694 343.456   1
  -3  10  10 4751.95 808.541   1
  -3  10   9 10262.7 1121.79   1
   3 -10  -9 8414.31 1108.30   2
  -3  10   8 6458.92 970.949   3
   3 -10  -8 4123.21 713.671   2
  -3  10   8 5140.88 769.707   1
   3 -10  -8 3886.18 675.349   1
   3 -10  -7 2794.96 563.902   1
  -3  10   7 2971.53 658.274   3
  -3  10   7 3056.17 574.356   1
  -3  10   6 9266.89 1067.94   3
  -3  10   6 8938.37 937.201   1
   3 -10  -6 6967.81 855.295   1
  -3  10   5 4246.21 622.472   1
   3 -10  -5 4138.65 754.301   3
   3 -10  -5 3975.13 538.534   2
  -3  10   5 4522.25 756.965   3
  -3  10   4 260.262 137.268   3
   3 -10  -4 437.383 169.873   2
  -3  10   4 636.806 246.626   1
   3 -10  -4 293.633 194.713   1
   3 -10  -4 378.034 306.439   3
  -3  10   3 827.457 291.155   3
   3 -10  -3 1139.36 278.138   1
   3 -10  -3 762.162 310.299   3
  -3  10   3 986.857 301.129   1
   3 -10  -3 1233.85 237.480   2
  -3  10   2 1760.18 455.958   3
   3 -10  -2 1895.67 479.651   3
   3 -10  -2 1935.56 370.265   1
  -3  10   2 1544.32 329.073   1
   3 -10  -2 1789.96 212.739   2
   3 -10  -1 8437.61 718.037   1
   3 -10  -1 7384.04 958.872   3
  -3  10   1 6563.34 859.682   3
   3 -10   0 7886.81 672.123   1
  -3  10   0 7239.57 892.144   3
   3 -10   0 6568.70 906.106   3
   3 -10   1 6228.43 610.985   1
   3 -10   1 5356.69 830.723   3
   3 -10   2 181.272 72.5864   1
   3 -10   2 543.443 280.892   3
   3 -10   3 1333.61 401.094   3
   3 -10   3 1456.02 299.683   1
  -3  10  -4 168.875 107.609   3
   3 -10   4 444.736 202.426   1
   3 -10   4 360.118 171.051   3
  -3  10  -5 10725.3 1165.11   3
   3 -10   5 10149.7 1157.88   3
  -3  10  -5 8971.47 430.681   2
  -3  10  -6 1075.61 187.597   2
  -3  10  -6 1214.24 426.172   3
  -3  10  -7 1827.79 295.615   2
  -3  10  -7 2234.50 530.808   3
  -3  10  -8 8838.62 720.159   2
  -3  10  -8 8384.43 1090.93   3
  -3  10  -9 603.053 344.655   3
  -3  10  -9 657.811 218.291   2
  -3  10 -10 6301.70 726.732   2
  -3  10 -10 6161.15 973.165   3
  -3  10 -11 1228.90 385.405   3
  -3  10 -11 692.986 273.949   2
  -3  10 -12 4911.96 716.729   2
  -3  10 -12 4256.84 822.479   3
  -3  10 -13 2126.76 641.788   3
   3 -10  13 1501.81 473.224   1
  -3  10 -14 313.180 310.106   3
   3 -10  14 619.657 326.495   1
   3 -10  15-164.567 245.894   1
  -3  10 -15 775.830 486.157   3
   3 -10  16 460.056 276.520   1
  -3  10 -16 297.359 289.165   3
  -3  10 -17 993.116 478.051   3
   3 -10  17 692.901 365.767   1
  -3  10 -18 385.014 322.377   3
   3 -10  18 861.056 441.911   1
   3 -10  19 1678.25 614.650   1
  -3  10 -19 2584.32 812.441   3
  -3   9  17 502.586 293.471   1
  -3   9  16 63.4750 159.604   1
  -3   9  15 1143.91 509.470   1
  -3   9  14 432.088 351.486   1
  -3   9  13 2650.41 667.725   1
  -3   9  12 1228.27 467.811   1
  -3   9  11 1798.89 498.983   1
   3  -9 -10 10969.5 1272.52   2
  -3   9  10 9977.64 1102.67   1
   3  -9  -9 100.025 165.097   2
  -3   9   9 528.381 248.505   1
   3  -9  -8 4010.65 695.268   2
   3  -9  -8 6156.03 934.997   3
  -3   9   8 5185.27 726.429   1
  -3   9   8 6131.08 894.549   3
  -3   9   7 4889.57 781.698   3
  -3   9   7 3641.29 622.817   1
   3  -9  -7 3478.92 592.835   1
   3  -9  -7 3536.94 705.539   3
   3  -9  -6 21133.8 1654.42   3
  -3   9   6 26173.5 1705.94   3
  -3   9   6 23135.9 1450.33   1
   3  -9  -6 27555.8 1544.59   2
  -3   9   5 139.074 99.2957   3
   3  -9  -5 218.548 149.825   2
   3  -9  -5 39.3705 78.1478   3
  -3   9   5 313.867 249.326   1
   3  -9  -5-1.76006 91.9041   1
   3  -9  -4 14823.1 905.237   2
  -3   9   4 14888.7 1045.11   1
   3  -9  -4 12180.1 1210.87   3
   3  -9  -4 15835.3 1081.85   1
  -3   9   4 13983.1 1169.49   3
  -3   9   3 20964.4 1442.47   3
   3  -9  -3 21696.1 1585.85   3
   3  -9  -3 21743.1 1161.24   1
   3  -9  -3 22336.1 937.014   2
  -3   9   3 21245.7 1170.72   1
   3  -9  -2 59.8341 29.5020   2
   3  -9  -2 129.129 117.178   1
  -3   9   2-128.040 169.203   3
   3  -9  -2 137.443 244.000   3
  -3   9   2 158.993 126.792   1
   3  -9  -1 1188.43 240.886   1
  -3   9   1 1137.19 234.663   1
   3  -9  -1 1562.65 413.833   3
  -3   9   1 1262.92 352.311   3
   3  -9   0 21429.1 978.546   1
   3  -9   0 20264.5 1520.87   3
   3  -9   1 5770.70 800.423   3
   3  -9   1 6146.04 535.700   1
   3  -9   2 33399.7 1952.09   3
   3  -9   2 38964.8 1372.52   1
   3  -9   3 2829.21 375.108   1
   3  -9   3 2498.45 537.076   3
   3  -9   4 3575.51 648.671   3
  -3   9  -4 3879.69 255.810   2
  -3   9  -5 4794.91 777.137   3
   3  -9   5 4689.06 760.141   3
  -3   9  -5 4540.42 371.618   2
  -3   9  -6 116.670 101.849   2
  -3   9  -6 38.0323 111.880   3
   3  -9   6 90.6461 78.7213   3
  -3   9  -7 19966.5 1040.56   2
  -3   9  -7 20495.2 1612.52   3
  -3   9  -8 389.799 154.626   2
  -3   9  -8 411.187 242.350   3
  -3   9  -9 12.9219 157.465   3
  -3   9  -9 135.948 143.934   2
  -3   9 -10 10325.6 1233.65   3
  -3   9 -10 9942.75 928.034   2
  -3   9 -11 4114.62 657.840   2
  -3   9 -11 4318.35 841.247   3
  -3   9 -12 2070.89 486.866   2
  -3   9 -12 1507.42 460.804   3
   3  -9  12 1296.81 431.568   1
   3  -9  13 674.097 315.787   1
  -3   9 -13 699.248 334.924   3
   3  -9  14 2805.03 655.364   1
  -3   9 -14 3350.96 821.142   3
   3  -9  15 1240.41 480.074   1
  -3   9 -15 2172.06 653.146   3
  -3   9 -16 1322.67 569.722   3
   3  -9  16 876.226 375.047   1
   3  -9  17 109.692 142.684   1
  -3   9 -17 447.020 333.925   3
   3  -9  18 246.173 246.986   1
  -3   9 -18 274.555 302.213   3
   3  -9  19 1717.22 595.770   1
  -3   9 -19 2641.86 767.060   3
  -3   8  18 414.361 300.925   1
  -3   8  17 1947.43 659.354   1
  -3   8  16 1320.56 495.131   1
  -3   8  15 103.140 247.471   1
  -3   8  14 1504.16 508.324   1
  -3   8  13 455.739 271.404   1
  -3   8  12 1784.49 522.341   1
  -3   8  11 17823.9 1558.42   1
   3  -8 -10 6193.18 942.225   2
  -3   8  10 6908.71 920.999   1
   3  -8  -9 8693.10 1052.94   2
   3  -8  -9 10059.2 1139.99   3
  -3   8   9 10878.8 1088.30   1
   3  -8  -8 608.913 297.816   3
  -3   8   8 969.424 361.672   3
  -3   8   8 955.520 353.595   1
  -3   8   7 5156.77 750.517   3
   3  -8  -7 3514.58 660.149   3
  -3   8   7 4193.34 596.680   1
  -3   8   6 62.2819 135.650   3
   3  -8  -6-189.364 144.313   3
   3  -8  -6 40.5977 115.736   2
  -3   8   6 78.4333 105.656   1
   3  -8  -5 3891.50 516.137   2
  -3   8   5 3973.10 616.922   3
  -3   8   5 3932.20 522.961   1
   3  -8  -5 4381.83 680.685   3
   3  -8  -5 4247.71 566.939   1
   3  -8  -4 36484.1 1966.92   3
  -3   8   4 33275.0 1446.17   1
  -3   8   4 33458.7 1722.78   3
   3  -8  -4 35296.9 1509.09   1
   3  -8  -4 33568.6 1347.53   2
   3  -8  -3 55616.6 2388.94   3
   3  -8  -3 50521.5 1368.29   2
  -3   8   3 51447.3 1700.71   1
  -3   8   3 50302.6 2086.73   3
   3  -8  -3 53790.5 1709.11   1
   3  -8  -2 19856.6 1414.13   3
  -3   8   2 19723.1 938.819   1
   3  -8  -2 19236.3 721.523   2
  -3   8   2 19077.8 1305.93   3
   3  -8  -2 18940.2 919.394   1
   3  -8  -1 4408.66 659.613   3
   3  -8  -1 3098.42 215.236   2
  -3   8   1 4650.64 415.283   1
   3  -8  -1 4980.83 439.675   1
   3  -8   0 14899.9 1205.11   3
   3  -8   0 14780.2 698.182   1
   3  -8   1 14224.7 1204.58   3
   3  -8   1 16762.6 764.336   1
   3  -8   2 9923.10 1012.73   3
   3  -8   2 10974.9 639.564   1
  -3   8  -3 89.5799 48.4325   2
   3  -8   3-177.172 167.826   3
   3  -8   3-12.4331 98.1290   1
  -3   8  -4 455.471 119.808   2
   3  -8   4 475.418 268.651   3
  -3   8  -5 13929.4 683.594   2
   3  -8   5 14034.3 1273.20   3
  -3   8  -6 65.7245 104.308   2
  -3   8  -6 92.6222 150.374   3
  -3   8  -7 1651.80 276.935   2
  -3   8  -7 1510.63 430.819   3
  -3   8  -8 3305.97 459.162   2
  -3   8  -8 3542.86 666.898   3
  -3   8  -9 6025.59 656.749   2
  -3   8  -9 6700.94 942.014   3
  -3   8 -10 1705.62 367.457   2
  -3   8 -10 1811.28 494.634   3
  -3   8 -11 5397.87 712.273   2
   3  -8  11 6399.35 880.849   1
  -3   8 -11 6169.34 958.798   3
   3  -8  12 305.934 236.040   1
  -3   8 -12 141.087 95.4901   2
  -3   8 -12 101.134 191.144   3
   3  -8  13 661.414 336.774   1
  -3   8 -13 1067.10 373.703   3
   3  -8  14 3997.67 781.017   1
  -3   8 -14 5290.83 936.577   3
   3  -8  15 1126.37 444.128   1
  -3   8 -15 1437.16 463.870   3
   3  -8  16-39.9761 153.896   1
  -3   8 -16-113.616 312.446   3
   3  -8  17-29.3236 239.020   1
  -3   8 -17-171.583 203.784   3
   3  -8  18 1039.84 421.622   1
  -3   8 -18 1185.26 450.555   3
   3  -8  19-224.179 274.823   1
  -3   8 -19-341.389 403.435   3
  -3   7  18 519.304 401.251   1
  -3   7  17 349.792 196.641   1
  -3   7  16 1506.37 529.382   1
  -3   7  15 159.235 253.497   1
  -3   7  14 2441.69 637.724   1
  -3   7  13-37.0628 267.998   1
  -3   7  12-525.767 297.084   1
   3  -7 -11 1566.56 459.552   3
  -3   7  11 1095.15 372.972   1
   3  -7 -10 36.6699 107.182   3
  -3   7  10-53.5265 252.339   1
   3  -7 -10 115.625 219.836   2
   3  -7  -9 1228.38 371.848   3
   3  -7  -9 875.272 310.425   2
  -3   7   9 1209.42 375.719   1
  -3   7   9 1028.35 297.603   2
  -3   7   8 3348.69 623.789   3
  -3   7   8 2445.18 493.620   1
   3  -7  -8 2235.16 512.801   3
  -3   7   8 2141.52 417.652   2
  -3   7   7 2739.92 541.999   3
   3  -7  -7 2633.07 550.101   3
  -3   7   7 2205.31 452.284   1
  -3   7   7 2071.88 388.109   2
  -3   7   6-95.6345 97.2051   3
   3  -7  -6 33.2236 124.790   2
   3  -7  -6-34.2492 102.701   3
  -3   7   6 93.5760 131.626   1
  -3   7   6-148.468 131.535   2
   3  -7  -5 13459.1 932.058   2
  -3   7   5 13568.5 1085.65   3
  -3   7   5 13040.9 896.007   1
   3  -7  -5 14119.4 1165.03   3
  -3   7   5 11416.2 771.339   2
   3  -7  -4 1066.38 240.831   2
   3  -7  -4 1206.54 365.230   3
  -3   7   4 1284.69 296.919   3
  -3   7   4 1163.01 256.191   1
   3  -7  -4 1207.83 265.020   1
  -3   7   4 1028.46 202.427   2
   3  -7  -3 174.653 115.674   1
  -3   7   3 254.669 126.962   1
   3  -7  -3 248.146 108.701   2
   3  -7  -3 241.195 140.951   3
  -3   7   3 127.974 96.0491   3
  -3   7   3 426.607 147.348   2
  -3   7   2 5718.77 676.333   3
  -3   7   2 5172.51 353.633   2
   3  -7  -2 5674.87 715.830   3
   3  -7  -2 5414.12 388.418   2
   3  -7  -2 5495.14 442.956   1
  -3   7   2 5725.17 459.254   1
  -3   7   1-98.8852 141.832   3
   3  -7  -1 121.502 69.0887   1
   3  -7  -1 193.213 132.135   3
  -3   7   1 169.873 72.3498   2
  -3   7   1-21.5625 75.6415   1
   3  -7  -1 121.579 63.6345   2
   3  -7   0 8095.69 843.692   3
   3  -7   0 8202.76 422.415   1
   3  -7   1 22144.9 709.968   1
   3  -7   1 23610.4 1450.60   3
  -3   7  -2 5787.19 314.700   2
   3  -7   2 6735.77 425.238   1
  -3   7  -2 5284.71 273.900   2
   3  -7   2 7227.55 817.996   3
  -3   7  -3 20038.7 673.798   2
   3  -7   3 22879.9 1495.27   3
   3  -7   4 281.893 201.322   3
  -3   7  -4 324.484 117.453   2
  -3   7  -5 6965.82 534.080   2
  -3   7  -6 4727.04 490.944   2
  -3   7  -7 709.378 223.283   2
  -3   7  -7 938.632 382.170   3
  -3   7  -8 1747.95 463.567   3
  -3   7  -8 1827.77 370.328   2
  -3   7  -9 17085.2 1163.51   2
  -3   7  -9 17699.9 1499.47   3
   3  -7   9 19348.1 1340.22   1
  -3   7 -10 16192.2 1163.18   2
  -3   7 -10 19935.3 1638.75   3
   3  -7  10 19898.5 1444.15   1
  -3   7 -11 18993.6 1647.94   3
  -3   7 -11 15409.9 1182.86   2
   3  -7  11 19387.7 1522.73   1
  -3   7 -12 1767.85 538.393   3
   3  -7  12 2229.09 582.624   1
   3  -7  13 637.263 328.856   1
  -3   7 -13 993.168 391.137   3
  -3   7 -14 574.383 349.309   3
   3  -7  14 384.555 267.510   1
  -3   7 -15 1189.37 429.125   3
   3  -7  15 503.978 288.067   1
   3  -7  16 228.522 267.455   1
  -3   7 -16 737.943 329.278   3
   3  -7  17 541.635 384.973   1
  -3   7 -17 338.017 172.299   3
  -3   7 -18 2436.31 766.567   3
   3  -7  18 1622.64 577.581   1
  -3   7 -19 708.566 448.110   3
   3  -7  19-24.1059 135.410   1
  -3   6  19 4171.79 960.935   1
  -3   6  18-518.972 489.961   1
  -3   6  17 217.297 187.431   1
  -3   6  16 257.775 294.390   1
  -3   6  15 1577.86 524.647   1
  -3   6  14 36.0738 196.469   1
   3  -6 -13 956.219 373.267   3
  -3   6  13 666.711 306.789   1
   3  -6 -12 4238.23 710.862   3
  -3   6  12 5006.74 758.481   2
  -3   6  12 5419.88 879.571   1
  -3   6  11 11830.6 1125.45   2
   3  -6 -11 11892.6 1158.15   3
  -3   6  11 14572.4 1334.90   1
   3  -6 -10 1898.97 449.209   3
  -3   6  10 2585.25 536.448   1
   3  -6 -10 2084.81 535.513   2
  -3   6  10 2281.31 474.133   2
  -3   6   9 18567.1 1259.84   2
   3  -6  -9 19066.5 1482.57   2
   3  -6  -9 18123.8 1360.97   3
  -3   6   9 21771.0 1485.36   1
  -3   6   8 12779.4 1115.71   3
   3  -6  -8 13926.0 1181.05   3
  -3   6   8 9732.00 877.323   2
  -3   6   8 11279.2 1029.68   1
   3  -6  -7 261.434 149.892   3
  -3   6   7 384.420 229.155   1
  -3   6   7 246.740 175.537   2
  -3   6   7 590.575 291.154   3
   3  -6  -6 7082.80 732.619   2
  -3   6   6 6552.33 727.417   3
   3  -6  -6 7467.04 822.252   3
  -3   6   6 5875.74 598.502   2
  -3   6   6 6057.72 671.372   1
   3  -6  -5 170.766 122.704   2
   3  -6  -5 280.782 122.678   3
  -3   6   5 142.839 136.527   1
  -3   6   5 172.738 91.7144   2
  -3   6   5 200.986 128.129   3
  -3   6   4 39566.7 1364.07   1
  -3   6   4 41178.1 1689.43   3
  -3   6   4 35674.2 1249.45   2
   3  -6  -4 39036.5 1368.11   2
  -3   6   3 7426.19 496.136   2
  -3   6   3 7707.15 527.442   1
  -3   6   3 8491.44 781.757   3
   3  -6  -3 8109.35 552.479   2
   3  -6  -3 8824.67 827.325   3
  -3   6   2 72664.5 2291.87   3
   3  -6  -2 73666.3 2367.00   3
  -3   6   2 72312.3 1451.68   1
   3  -6  -2 67913.3 1425.30   2
  -3   6   1 14353.3 565.468   2
  -3   6   1 14210.9 1022.99   3
   3  -6  -1 14759.8 1058.29   3
  -3   6   1 12585.6 494.994   1
   3  -6  -1 14062.1 596.747   2
   3  -6   0 25845.9 1434.10   3
  -3   6   0 23441.9 660.198   2
   3  -6   1 6558.31 743.474   3
  -3   6  -1 6063.52 347.240   2
   3  -6   2 31164.4 1622.25   3
   3  -6   3 5643.81 709.531   3
  -3   6  -4-64.9003 126.749   2
  -3   6  -5 15963.5 831.573   2
   3  -6   5 18453.0 928.741   1
  -3   6  -6 5751.93 574.362   2
   3  -6   6 6764.03 636.263   1
  -3   6  -7 2942.69 443.221   2
   3  -6   7 2809.50 447.763   1
  -3   6  -8 4370.78 558.953   2
  -3   6  -8 4149.34 693.984   3
   3  -6   8 4809.12 644.642   1
  -3   6  -9 3578.07 654.223   3
  -3   6  -9 3786.99 559.635   2
   3  -6   9 4207.91 638.902   1
   3  -6  10 1005.97 329.940   1
  -3   6 -10 1308.75 414.883   3
  -3   6 -10 614.997 237.096   2
   3  -6  11 704.345 303.317   1
  -3   6 -11 80.7696 200.783   3
  -3   6 -11 348.100 181.206   2
   3  -6  12 112.100 117.255   1
  -3   6 -12-30.0210 317.584   3
  -3   6 -13 410.639 291.014   3
   3  -6  13 181.573 166.566   1
  -3   6 -14 3234.74 778.948   3
   3  -6  14 1897.51 531.967   1
   3  -6  15 1172.74 430.011   1
  -3   6 -15 1863.37 585.459   3
  -3   6 -16 1318.82 517.845   3
   3  -6  16 1161.55 378.503   1
  -3   6 -17 527.469 334.462   3
   3  -6  17 344.421 268.398   1
   3  -6  18 25.2367 220.855   1
  -3   6 -18 334.826 308.204   3
   3  -6  19 126.854 318.576   1
  -3   6 -19 29.5176 144.211   3
  -3   5  19 1062.74 551.869   1
  -3   5  18 12.0875 169.915   1
  -3   5  17 571.149 369.057   1
  -3   5  16 1517.52 540.697   1
  -3   5  15 2019.49 589.218   1
   3  -5 -14 1407.21 412.124   3
  -3   5  14 1386.38 485.088   1
  -3   5  14 734.005 263.943   2
   3  -5 -13 944.008 339.285   3
  -3   5  13 1107.54 423.769   1
  -3   5  13 457.685 293.285   2
   3  -5 -12 12203.4 1151.29   3
  -3   5  12 13395.7 1222.64   2
  -3   5  12 15157.5 1395.43   1
   3  -5 -11 838.514 321.618   3
  -3   5  11 1110.67 378.027   1
  -3   5  11 684.326 328.710   2
   3  -5 -10 4117.02 729.022   2
   3  -5 -10 4574.72 654.529   3
  -3   5  10 5294.78 737.753   2
  -3   5  10 5212.12 733.423   1
  -3   5   9 1324.70 367.028   2
   3  -5  -9 1400.13 395.916   2
   3  -5  -9 1190.33 328.739   3
  -3   5   9 870.852 335.540   1
  -3   5   8 4236.00 589.244   3
  -3   5   8 2888.02 505.975   1
   3  -5  -8 3074.69 512.439   3
  -3   5   8 2558.14 446.916   2
  -3   5   7 16948.3 1154.12   3
   3  -5  -7 16148.7 1143.03   3
  -3   5   7 11974.3 923.178   2
  -3   5   7 13609.0 1016.30   1
  -3   5   6 21387.4 1231.98   3
  -3   5   6 16393.4 1009.27   2
   3  -5  -6 22528.3 1294.46   3
  -3   5   6 18294.7 1080.06   1
   3  -5  -6 19968.2 1194.54   2
   3  -5  -5 22829.7 1260.37   3
  -3   5   5 21353.7 1145.42   3
  -3   5   5 20649.1 1045.25   1
   3  -5  -5 20337.6 1094.99   2
   3  -5  -4-19.0212 69.6952   2
  -3   5   4 189.214 149.183   3
  -3   5   4 135.583 107.532   1
   3  -5  -4 60.7896 132.592   3
  -3   5   4 214.405 145.138   2
   3  -5  -3 483.193 161.616   2
  -3   5   3 310.188 186.412   3
  -3   5   3 145.477 117.952   2
   3  -5  -3 349.215 186.583   3
  -3   5   3 240.164 119.561   1
  -3   5   2 34655.2 1043.61   2
  -3   5   2 34374.9 849.978   1
   3  -5  -2 36705.1 1113.31   2
  -3   5   2 37262.2 1505.52   3
   3  -5  -2 37597.3 1559.54   3
  -3   5   1 84042.3 2302.82   3
   3  -5  -1 84335.6 2382.23   3
   3  -5  -1 83279.1 1569.96   2
  -3   5   1 77596.6 1418.22   2
  -3   5   0 2387.50 408.692   3
   3  -5   0 2360.29 402.163   3
  -3   5   0 2056.68 221.212   2
   3  -5   1 14247.2 1024.48   3
  -3   5  -1 14493.3 645.049   2
   3  -5   2 12413.6 981.836   3
   3  -5   2 10712.8 375.968   1
   3  -5   3 16606.5 638.308   1
   3  -5   4 11527.0 646.692   1
   3  -5   5 20366.8 981.325   1
  -3   5  -6 19938.3 1067.01   2
   3  -5   6 22294.5 1139.99   1
   3  -5   7 122.825 149.516   1
  -3   5  -7 61.7408 87.5396   2
  -3   5  -8 119.021 134.988   3
  -3   5  -8 25.7631 67.3130   2
   3  -5   8 143.916 81.9971   1
   3  -5   9-72.1487 119.206   1
  -3   5  -9 153.837 155.857   3
  -3   5  -9 72.9964 110.467   2
  -3   5 -10 40428.7 1997.30   2
  -3   5 -10 42664.8 2372.57   3
   3  -5  10 45326.9 2194.40   1
   3  -5  11 2667.27 565.751   1
  -3   5 -11 3112.25 679.736   3
   3  -5  12 141.492 143.800   1
  -3   5 -12 51.4379 198.286   3
   3  -5  13-64.3662 288.254   1
  -3   5 -13-114.671 255.092   3
   3  -5  14 444.256 327.663   1
  -3   5 -14 587.709 343.094   3
   3  -5  15 783.632 348.219   1
  -3   5 -15 1039.08 452.377   3
   3  -5  16-78.0830 241.947   1
  -3   5 -16 541.456 452.501   3
   3  -5  17-204.804 369.311   1
  -3   5 -17 187.980 279.026   3
   3  -5  18 1710.60 614.146   1
  -3   5 -18 1369.04 558.427   3
   3  -5  19 1583.71 646.838   1
  -3   5 -19 1246.14 400.260   3
  -3   4  19 3673.22 891.806   1
  -3   4  18 365.722 270.315   1
  -3   4  17 3495.08 836.520   1
  -3   4  16 617.276 394.845   1
  -3   4  15 1028.18 429.888   1
   3  -4 -15 792.072 304.561   3
  -3   4  15 575.316 228.254   2
  -3   4  14 3587.37 780.613   1
  -3   4  14 2719.53 613.163   2
   3  -4 -14 3632.41 657.616   3
   3  -4 -13 898.540 313.471   3
  -3   4  13 1232.78 391.361   1
  -3   4  13 1049.46 345.547   2
  -3   4  12 154.507 228.530   1
   3  -4 -12 400.158 228.568   3
  -3   4  12 601.705 325.196   2
  -3   4  11 2486.63 546.765   1
   3  -4 -11 3123.87 631.528   2
  -3   4  11 2338.64 523.382   2
   3  -4 -11 2302.70 461.225   3
   3  -4 -10 7674.07 935.812   2
  -3   4  10 8976.58 948.860   2
   3  -4 -10 8944.55 856.138   3
  -3   4  10 10680.2 1071.05   1
   3  -4  -9 330.730 134.730   3
  -3   4   9 594.356 243.338   1
   3  -4  -9 372.287 230.760   2
  -3   4   9 149.091 84.2655   2
  -3   4   8 2765.44 465.346   1
   3  -4  -8 2920.44 453.867   3
  -3   4   8 2082.75 405.415   2
  -3   4   7 1891.62 368.340   2
  -3   4   7 1845.30 367.424   1
  -3   4   7 2699.32 437.410   3
   3  -4  -7 2732.36 427.026   3
   3  -4  -6 20802.3 1121.75   3
  -3   4   6 20339.4 1090.44   3
  -3   4   6 18667.2 1106.35   1
   3  -4  -6 18284.9 1102.68   2
  -3   4   5 6966.36 607.458   3
  -3   4   5 5832.10 583.815   2
   3  -4  -5 7136.29 639.054   3
  -3   4   5 6297.65 599.221   1
   3  -4  -5 6140.79 596.278   2
   3  -4  -4 2441.15 380.382   3
  -3   4   4 2156.68 333.614   2
  -3   4   4 2326.71 375.451   3
  -3   4   4 2448.64 337.006   1
   3  -4  -4 2077.83 323.586   2
  -3   4   3 105198. 2074.06   2
  -3   4   3 117489. 2502.72   3
   3  -4  -3 115469. 2517.81   3
   3  -4  -3 107360. 2097.44   2
  -3   4   3 113677. 1882.11   1
  -3   4   2 16180.2 933.394   3
   3  -4  -2 16315.4 962.063   3
   3  -4  -2 15967.3 766.795   2
  -3   4   2 17022.1 580.262   1
  -3   4   2 15086.2 701.293   2
  -3   4   1 3774.04 442.461   3
   3  -4  -1 3541.44 450.736   3
   3  -4  -1 3757.86 359.033   2
  -3   4   1 4045.48 372.163   2
  -3   4   0 43481.1 1608.69   3
   3  -4   0 41672.3 1615.51   3
  -3   4   0 41292.4 1142.18   2
   3  -4   1 19385.4 1149.89   3
  -3   4  -1 21243.9 876.484   2
   3  -4   2 4121.54 262.882   1
   3  -4   3 6219.40 408.280   1
   3  -4   4 18598.7 831.383   1
   3  -4   5 150.559 113.758   1
   3  -4   6 16851.2 996.747   1
   3  -4   7 2637.86 445.349   1
  -3   4  -7 2727.59 431.949   2
  -3   4  -8 10249.5 909.542   2
   3  -4   8 11431.3 958.407   1
  -3   4  -9 4423.91 652.073   2
   3  -4   9 4476.64 622.051   1
   3  -4  10 28.7212 167.171   1
  -3   4 -10 46.6083 80.9554   2
   3  -4  11 30275.9 1867.96   1
   3  -4  12 1075.11 415.900   1
   3  -4  13 3099.66 662.139   1
   3  -4  14 1040.60 410.984   1
   3  -4  15 381.290 239.517   1
   3  -4  16 287.448 262.182   1
   3  -4  17 978.810 470.263   1
  -3   4 -17 758.312 421.111   3
   3  -4  18-104.891 257.668   1
  -3   4 -18 445.722 415.653   3
   3  -4  19 1830.83 613.279   1
  -3   4 -19 3337.28 896.948   3
  -3   3  20-535.689 410.182   1
  -3   3  19 2759.34 752.377   1
  -3   3  18-108.162 277.074   1
  -3   3  17-123.847 379.630   1
  -3   3  17-235.455 246.497   2
  -3   3  16 777.086 377.244   1
  -3   3  16 639.890 228.587   2
  -3   3  15 4250.61 755.983   2
   3  -3 -15 5962.42 823.237   3
  -3   3  15 5449.33 969.584   1
  -3   3  14 2110.15 580.779   1
   3  -3 -14 1251.24 323.969   3
  -3   3  14 1817.92 518.979   2
   3  -3 -13-107.470 168.941   3
  -3   3  13 129.130 176.365   1
  -3   3  13 257.912 219.087   2
   3  -3 -12 12293.4 1038.81   3
  -3   3  12 12743.9 1226.78   2
  -3   3  12 14966.3 1398.50   1
   3  -3 -11 679.749 230.082   3
  -3   3  11 737.161 292.971   2
   3  -3 -11 1087.52 407.098   2
  -3   3  11 767.249 150.388   1
   3  -3 -10 4927.94 734.039   2
   3  -3 -10 4606.91 576.087   3
  -3   3  10 4917.45 669.434   2
  -3   3  10 4536.07 708.186   1
   3  -3  -9-40.1817 119.260   2
  -3   3   9 21.3233 144.674   2
   3  -3  -9 14.3166 75.7227   3
  -3   3   9 152.150 159.281   1
  -3   3   8 2979.44 467.451   2
   3  -3  -8 4076.49 490.300   3
   3  -3  -7 356.966 208.873   2
   3  -3  -7 358.403 175.206   3
  -3   3   7 393.661 204.644   2
  -3   3   7 194.036 105.416   3
   3  -3  -6 1978.18 315.448   3
  -3   3   6 1749.73 337.098   2
   3  -3  -6 1878.16 368.674   2
  -3   3   6 1779.37 294.148   3
  -3   3   5 20485.5 1088.57   2
   3  -3  -5 19938.3 960.571   3
  -3   3   5 21720.0 959.622   3
   3  -3  -5 20273.5 1086.23   2
  -3   3   4 4130.99 466.016   2
   3  -3  -4 3981.55 430.274   3
  -3   3   4 3566.53 382.790   3
   3  -3  -4 4299.49 490.884   2
   3  -3  -3 73087.3 1795.35   3
   3  -3  -3 73480.1 1797.62   2
  -3   3   3 73230.5 1748.37   3
  -3   3   2 34471.5 1260.34   3
   3  -3  -2 35322.3 1285.49   3
   3  -3  -2 36803.2 1246.67   2
  -3   3   2 32241.0 1105.73   2
  -3   3   1 27.6992 100.548   3
   3  -3  -1-36.7535 81.3312   2
   3  -3  -1 106.523 104.670   3
  -3   3   1-115.441 135.144   2
  -3   3   0 2708.50 378.506   3
   3  -3   0 2614.31 370.651   3
  -3   3   0 3322.72 374.949   2
   3  -3   1 13484.6 481.181   1
  -3   3  -1 14988.9 938.037   3
   3  -3   2 393.697 132.114   1
  -3   3  -2 526.976 139.326   1
   3  -3   3 390.892 133.189   1
   3  -3   4 2425.60 314.775   1
   3  -3   5 35954.9 1348.85   1
   3  -3   6 1873.54 340.697   1
   3  -3   7 792.327 268.118   1
  -3   3  -8 4096.63 610.941   2
   3  -3   8 5073.47 638.478   1
  -3   3  -9 7799.48 860.195   2
   3  -3   9 8122.84 880.393   1
  -3   3 -10 4404.41 683.741   2
   3  -3  10 4850.37 726.124   1
   3  -3  11 129.573 152.527   1
   3  -3  12 272.435 256.130   1
   3  -3  13 129.868 189.216   1
   3  -3  14 25662.2 2008.87   1
   3  -3  15 239.374 125.228   1
   3  -3  16 57.6061 124.791   1
   3  -3  17 129.616 202.965   1
   3  -3  18 284.973 292.580   1
   3  -3  19 534.926 381.133   1
  -3   2  20 109.514 249.221   1
  -3   2  19-105.714 245.522   1
  -3   2  18 1516.80 600.316   1
  -3   2  18 1427.76 519.488   2
  -3   2  17 147.274 159.838   2
  -3   2  17 377.173 337.958   1
  -3   2  16 1140.13 461.294   1
   3  -2 -16 955.949 337.700   3
  -3   2  16 215.054 209.728   2
  -3   2  15 1469.49 441.184   1
   3  -2 -15 2192.67 489.674   3
  -3   2  15 1155.90 390.682   2
   3  -2 -14 84.6861 59.2794   3
  -3   2  14-22.0488 150.564   2
  -3   2  13 959.807 312.250   1
   3  -2 -13 1187.49 325.959   3
  -3   2  13 1458.70 477.099   2
   3  -2 -12 7604.45 755.653   3
  -3   2  12 8772.35 1013.71   2
  -3   2  12 9510.41 1120.14   1
   3  -2 -11 1107.21 273.744   3
   3  -2 -11 2257.68 543.206   2
  -3   2  11 1826.68 496.903   2
   3  -2 -10 3234.03 602.747   2
   3  -2 -10 2555.44 384.748   3
  -3   2  10 2653.24 513.993   2
   3  -2  -9 1019.23 246.619   3
  -3   2   9 1160.68 311.973   2
  -3   2   8 3462.63 512.432   2
   3  -2  -8 4353.66 445.835   3
   3  -2  -7 2522.97 340.967   3
  -3   2   7 1737.30 436.845   2
  -3   2   6 8581.00 554.819   3
  -3   2   6 9707.87 810.133   2
   3  -2  -6 8545.86 553.966   3
   3  -2  -5 3351.47 331.591   3
  -3   2   5 3184.12 323.467   3
  -3   2   5 3612.11 490.419   2
  -3   2   4 63386.8 1477.90   3
   3  -2  -4 63542.3 1454.41   3
  -3   2   4 67007.7 1846.93   2
  -3   2   3 4419.24 386.639   3
   3  -2  -3 5522.94 436.590   3
   3  -2  -3 4727.84 474.033   2
  -3   2   3 4153.62 422.785   2
   3  -2  -2 2015.36 285.872   3
   3  -2  -2 1715.70 282.489   2
  -3   2   2 2186.84 328.972   3
  -3   2   2 1201.33 224.553   2
  -3   2   1-68.0205 131.326   3
  -3   2   1 78.8513 54.7679   1
  -3   2   1-0.72115 74.3983   2
  -3   2   0 4428.25 467.490   3
  -3   2   0 3779.10 439.331   2
  -3   2   0 3945.53 306.355   1
  -3   2  -1 81067.4 1410.77   1
   3  -2   1 82953.1 1521.85   1
  -3   2  -1 77572.6 2066.10   3
   3  -2   2 6000.50 462.599   1
  -3   2  -2 7298.41 494.558   1
   3  -2   3 2691.14 349.404   1
  -3   2  -3 2534.50 320.429   1
   3  -2   4 71164.5 1790.33   1
  -3   2  -4 63128.6 1783.43   1
  -3   2  -5 808.871 223.709   1
   3  -2   5 460.387 185.535   1
   3  -2   6 65.5802 132.217   1
   3  -2   7 9073.67 828.616   1
   3  -2   8 1644.35 410.173   1
  -3   2  -9 33794.6 1834.40   2
   3  -2   9 36494.3 1907.77   1
   3  -2  10 250.023 212.540   1
   3  -2  11 628.310 286.970   1
   3  -2  12 709.957 288.614   1
   3  -2  13 755.415 396.218   1
   3  -2  14 4757.54 869.513   1
   3  -2  15 1225.13 492.165   1
   3  -2  16 5765.30 1076.52   1
   3  -2  17 4928.77 1008.93   1
   3  -2  18-54.3226 215.318   1
   3  -2  19 1543.57 592.298   1
  -3   1  20 402.566 344.322   1
  -3   1  19 205.672 257.212   1
  -3   1  19-94.0962 156.649   2
  -3   1  18 1911.90 589.776   1
  -3   1  18 1587.98 496.043   2
  -3   1  17 1001.20 471.775   1
  -3   1  17 739.848 404.777   2
  -3   1  16 1681.85 514.648   1
   3  -1 -16 1532.77 416.798   3
  -3   1  16 1929.02 548.993   2
   3  -1 -15 7226.41 832.037   3
  -3   1  15 6215.98 985.743   2
  -3   1  15 6517.76 1033.43   1
   3  -1 -14 844.329 277.266   3
  -3   1  14 1023.24 395.648   2
  -3   1  14 1289.35 489.652   1
   3  -1 -13 10508.6 888.936   3
  -3   1  13 11975.7 1252.66   2
   3  -1 -12 637.793 203.407   3
  -3   1  12 481.918 169.148   2
   3  -1 -11 9948.02 745.070   3
  -3   1  11 10240.2 1046.64   2
   3  -1 -11 12543.4 1214.44   2
   3  -1 -10 2331.72 326.155   3
  -3   1  10 2455.41 481.953   2
  -3   1   9 11345.9 1000.21   2
   3  -1  -9 12832.4 714.275   3
   3  -1  -8 1570.15 243.837   3
  -3   1   8 1013.06 353.231   2
  -3   1   7 40430.1 1769.63   2
   3  -1  -7 36085.3 994.211   3
  -3   1   6 5039.78 364.152   3
   3  -1  -6 4608.20 329.059   3
  -3   1   6 5247.45 613.457   2
  -3   1   5 4293.83 296.368   3
   3  -1  -5 5160.78 341.962   3
  -3   1   5 5398.83 610.513   2
   3  -1  -4 4456.06 336.440   3
  -3   1   4 4511.39 337.330   3
  -3   1   4 5446.13 551.690   2
  -3   1   3 14741.3 695.813   3
  -3   1   3 13540.4 832.602   2
  -3   1   2 41524.5 1297.61   3
  -3   1   2 37053.3 1357.77   2
  -3   1   1 15745.5 925.550   3
  -3   1   1 16335.3 715.632   1
  -3   1   1 15419.5 908.736   2
  -3   1   0 78853.5 2036.05   2
  -3   1   0 80233.1 1658.39   1
  -3   1  -1 114000. 2034.28   1
   3  -1   1 100392. 1957.14   1
   3  -1   2 287.254 146.709   1
  -3   1  -2 370.513 124.433   1
   3  -1   3 56488.2 1727.94   1
  -3   1  -3 50820.3 1573.84   1
   3  -1   4 4980.67 513.448   1
  -3   1  -4 3815.37 450.455   1
  -3   1  -5 1945.71 358.593   1
   3  -1   5 1844.03 332.100   1
  -3   1  -6-170.851 123.274   1
   3  -1   6 142.716 170.959   1
   3  -1   7 9243.49 870.645   1
  -3   1  -7 9254.27 911.762   1
   3  -1   8 14226.1 1159.05   1
   3  -1   9 813.737 308.377   1
   3  -1  10 1745.31 453.785   1
   3  -1  11 316.247 249.558   1
   3  -1  12 368.971 241.921   1
   3  -1  13 9643.96 1210.49   1
   3  -1  14 903.109 423.039   1
   3  -1  15 472.598 380.446   1
   3  -1  16 153.905 401.215   1
   3  -1  17 363.152 310.510   1
   3  -1  18 646.440 395.352   1
  -3   0  20 42.1349 401.754   1
  -3   0  20 254.257 140.907   2
  -3   0  19-131.773 244.964   1
  -3   0  19 27.7572 216.118   2
  -3   0  18 768.955 390.415   2
  -3   0  18 193.070 283.568   1
  -3   0  17 50.7435 167.226   1
  -3   0  17-298.590 229.131   2
  -3   0  16 6499.72 1034.19   2
   3   0 -16 7101.10 809.037   3
  -3   0  16 6090.93 1074.14   1
   3   0 -15 301.698 156.160   3
  -3   0  15 215.270 230.815   2
   3   0 -14 7870.95 769.605   3
  -3   0  14 8658.04 1109.27   2
  -3   0  13 8670.23 1062.49   2
   3   0 -13 7031.49 677.224   3
   3   0 -12 1039.59 241.984   3
  -3   0  12 1138.55 384.947   2
   3   0 -11 2347.22 483.793   2
   3   0 -11 1638.66 265.090   3
  -3   0  11 1581.38 420.095   2
   3   0 -10 2122.17 281.398   3
  -3   0  10 2761.67 530.178   2
   3   0  -9 12543.8 593.626   3
  -3   0   9 12020.7 1088.43   2
   3   0  -8 17249.9 621.578   3
  -3   0   8 18330.6 1268.80   2
  -3   0   7 71.9809 97.8907   2
   3   0  -7 202.165 56.0707   3
  -3   0   6 1167.49 414.393   2
  -3   0   5 6134.41 647.678   2
  -3   0   4 62218.0 1030.69   3
  -3   0   4 67154.3 1953.99   2
  -3   0   3 6699.88 407.205   3
  -3   0   3 5801.90 565.332   2
  -3   0   2 255703. 3753.77   2
  -3   0   1 41421.4 1415.73   1
  -3   0   1 48520.9 1728.53   2
  -3   0   0 42974.6 1732.87   2
   3   0   0 39745.9 1376.15   1
  -3   0   0 44511.0 1431.49   1
   3   0   1 5342.06 532.833   1
  -3   0  -1 5691.48 545.799   1
  -3   0  -2 17087.2 943.203   1
   3   0   2 17644.9 1021.18   1
  -3   0  -3 37327.6 1464.44   1
   3   0   3 43680.9 1642.26   1
   3   0   4 176476. 3401.99   1
  -3   0  -4 146174. 3074.63   1
   3   0   5 98589.6 2622.99   1
  -3   0  -5 79006.3 2365.47   1
   3   0   6 1797.39 372.756   1
  -3   0  -6 2211.98 425.267   1
  -3   0  -7 1113.25 310.045   1
   3   0   7 1162.55 316.734   1
  -3   0  -8 3117.76 578.513   1
   3   0   8 2628.76 507.304   1
   3   0   9 21391.5 1536.69   1
   3   0  10 3342.58 640.844   1
   3   0  11 2393.00 610.804   1
   3   0  12-54.6291 178.137   1
   3   0  13 63.6008 195.607   1
   3   0  14 1516.36 533.963   1
   3   0  15 298.784 249.757   1
   3   0  16 1652.35 578.495   1
   3   0  17 1045.13 468.741   1
   3   0  18 503.751 398.835   1
  -3  -1  20 15.5280 280.474   1
  -3  -1  20 459.548 366.542   2
  -3  -1  19 345.440 292.109   1
  -3  -1  19 599.466 383.882   2
  -3  -1  18 5502.90 1008.90   2
  -3  -1  18 6324.52 1172.04   1
  -3  -1  17 284.972 257.751   2
  -3  -1  16 2754.92 703.832   2
  -3  -1  15 5629.09 945.405   2
   3   1 -15 4307.57 575.214   3
  -3  -1  14 4426.07 767.600   2
   3   1 -14 4472.23 545.736   3
  -3  -1  13 4591.38 773.396   2
   3   1 -13 3303.40 429.910   3
   3   1 -12 284.493 102.232   3
  -3  -1  12 768.477 342.894   2
   3   1 -11 3047.29 581.463   2
   3   1 -11 2331.66 287.457   3
  -3  -1  11 1897.75 445.374   2
   3   1 -10 667.357 141.177   3
  -3  -1  10 1032.95 341.080   2
   3   1  -9 148.533 63.5396   3
  -3  -1   9 293.737 112.306   2
  -3  -1   8 2665.75 515.674   2
  -3  -1   7 4696.55 623.298   2
  -3  -1   6 163280. 3393.18   2
  -3  -1   5 15875.9 1013.05   2
  -3  -1   4 39294.3 813.392   3
  -3  -1   4 60922.7 1939.86   2
  -3  -1   3 4962.75 550.280   2
  -3  -1   2 59090.1 1921.39   2
  -3  -1   1 63270.0 1834.20   1
  -3  -1   1 61909.8 2021.57   2
   3   1   0 121869. 2574.22   1
  -3  -1   0 118514. 2896.07   2
  -3  -1   0 124455. 2627.79   1
   3   1   1 141671. 2836.01   1
  -3  -1  -1 152418. 3019.72   1
  -3  -1  -2 121.680 89.8453   1
   3   1   2-77.6653 147.025   1
  -3  -1  -3 145.581 81.0808   1
   3   1   3 129.288 176.015   1
   3   1   4 34510.1 1678.44   1
  -3  -1  -4 30618.4 1491.89   1
   3   1   5 31102.1 1589.00   1
  -3  -1  -5 28976.2 1534.17   1
  -3  -1  -6 3065.39 507.430   1
   3   1   6 2424.19 470.482   1
  -3  -1  -7 630.660 226.008   1
   3   1   7 400.438 160.415   1
   3   1   8 2961.28 551.621   1
  -3  -1  -8 3312.18 624.823   1
   3   1   9 23628.1 1623.73   1
  -3  -1  -9 29245.5 1939.41   1
   3   1  10 11158.8 1151.75   1
   3   1  11 1245.98 324.170   1
   3   1  12 4900.69 850.251   1
   3   1  13 1569.64 481.220   1
   3   1  14 1339.25 534.609   1
   3   1  15 1237.54 468.034   1
   3   1  16 3154.76 798.308   1
   3   1  17 1485.87 551.760   1
   3   1  18 3451.66 875.094   1
  -3  -2  20 702.695 413.694   1
  -3  -2  20 624.596 407.216   2
  -3  -2  19 632.857 434.499   2
  -3  -2  19 1073.72 496.794   1
  -3  -2  18 2137.42 653.579   2
   3   2 -17-88.5629 54.7476   3
  -3  -2  17-323.335 139.362   2
   3   2 -16 656.715 224.968   3
  -3  -2  16 559.892 350.012   2
   3   2 -15 18383.3 1131.69   3
  -3  -2  15 19493.0 1690.60   2
   3   2 -14 153.341 110.044   3
   3   2 -14 81.0638 51.6515   3
   3   2 -13 4474.87 471.471   3
  -3  -2  13 4362.28 747.784   2
   3   2 -13 4847.67 480.639   3
   3   2 -12 8398.87 585.841   3
   3   2 -12 7993.01 551.967   3
   3   2 -11-35.8728 29.5144   3
   3   2 -11 13.0115 92.4110   2
   3   2 -11-12.7649 34.1664   3
  -3  -2  10 4814.44 739.169   2
   3   2 -10 4313.47 270.596   3
  -3  -2   9 309.830 137.334   2
  -3  -2   8 8377.56 879.256   2
  -3  -2   7 38557.1 1771.52   2
  -3  -2   6 7371.59 732.462   2
  -3  -2   5 32001.0 1507.05   2
  -3  -2   4 54196.0 1054.65   3
  -3  -2   4 77350.1 2255.56   2
  -3  -2   3 2723.00 451.270   2
  -3  -2   2 35294.4 1554.72   2
  -3  -2   2 36230.8 1547.40   1
  -3  -2   1 603.348 206.582   1
  -3  -2   1 427.394 153.257   2
   3   2   0 7804.71 704.728   1
  -3  -2   0 7143.04 799.715   2
  -3  -2   0 7527.95 743.016   1
   3   2   1 21357.0 1192.10   1
  -3  -2  -1 20945.2 1228.47   1
   3   2   2 35591.4 1677.50   1
  -3  -2  -2 34804.4 1611.92   1
  -3  -2  -3 15689.1 1081.70   1
   3   2   3 19175.8 1263.85   1
  -3  -2  -4 27009.3 1497.73   1
   3   2   4 29849.2 1616.86   1
   3   2   5 14369.3 1163.32   1
  -3  -2  -5 14511.8 1139.00   1
   3   2   6 26.1377 104.157   1
  -3  -2  -6 171.469 221.131   1
  -3  -2  -7 799.271 286.877   1
   3   2   7 1012.38 364.331   1
   3   2   8 6714.62 882.135   1
  -3  -2  -8 9086.91 1046.48   1
   3   2   9 16286.2 1405.39   1
   3   2  10 795.364 409.312   1
   3   2  11 797.721 336.569   1
   3   2  12 9854.05 1228.43   1
   3   2  13 4650.81 861.412   1
   3   2  14 460.219 310.048   1
   3   2  15 1826.07 635.478   1
   3   2  16 2737.39 783.952   1
   3   2  17-24.4821 186.018   1
  -3  -3  20 439.051 303.881   2
  -3  -3  20 203.363 148.657   1
  -3  -3  19 1119.03 482.515   2
  -3  -3  18 620.732 383.418   2
   3   3 -17 88.7218 70.5203   3
  -3  -3  17 1423.97 538.044   2
   3   3 -16-15.6623 78.3927   3
  -3  -3  16 246.405 257.068   2
   3   3 -15 2276.16 380.253   3
   3   3 -15 3542.49 432.460   3
  -3  -3  15 2646.72 606.561   2
  -3  -3  14 72.8837 240.801   2
   3   3 -14 163.209 39.1506   3
   3   3 -13 2946.62 341.647   3
  -3  -3  13 3552.50 678.370   2
  -3  -3  12 60799.7 2750.13   2
   3   3 -12 55023.1 1286.11   3
   3   3 -11 2676.70 252.200   3
  -3  -3  11 3774.60 697.006   2
   3   3 -11 3076.71 252.314   3
  -3  -3  10 7770.07 950.495   2
   3   3 -10 7083.25 867.743   2
  -3  -3   9 220.441 101.208   2
  -3  -3   8 185.414 204.528   2
  -3  -3   7 3489.40 535.575   2
  -3  -3   6 241.948 171.376   2
  -3  -3   5 227054. 2095.43   3
  -3  -3   5 265155. 4408.09   2
  -3  -3   4 21054.1 768.306   3
  -3  -3   4 16681.5 1182.38   2
  -3  -3   3 43701.5 1287.16   3
  -3  -3   3 39759.7 1781.88   2
  -3  -3   2 385.645 231.598   1
  -3  -3   2 47.2532 152.619   2
  -3  -3   1 3721.09 602.726   1
  -3  -3   1 3845.73 558.292   2
   3   3   0 5355.08 706.320   1
  -3  -3   0 6217.75 682.006   1
   3   3   1 11236.2 927.820   1
  -3  -3  -1 11921.8 1027.88   1
  -3  -3  -2 18062.8 1245.99   1
   3   3   2 21770.4 1365.80   1
   3   3   3 3871.15 621.570   1
  -3  -3  -3 3091.90 525.637   1
  -3  -3  -4 30857.1 1702.89   1
   3   3   4 33276.3 1800.05   1
  -3  -3  -5 1186.52 377.672   1
   3   3   5 1182.10 341.768   1
   3   3   6 5076.76 758.194   1
  -3  -3  -6 4534.63 703.651   1
  -3  -3  -7 2032.54 483.780   1
   3   3   7 1984.45 498.712   1
   3   3   8 9979.62 1104.39   1
   3   3   9 10405.7 1196.03   1
   3   3  10 11995.3 1309.12   1
   3   3  11 371.926 261.881   1
   3   3  12 2067.63 615.985   1
   3   3  13 4973.90 938.023   1
   3   3  14 1560.57 572.364   1
   3   3  15 5616.90 1084.97   1
   3   3  16 211.723 126.574   1
   3   3  17 181.264 235.208   1
  -3  -4  20 198.886 250.756   2
  -3  -4  19 373.831 258.341   2
  -3  -4  18 274.018 300.434   2
  -3  -4  17 3386.16 799.810   2
   3   4 -16 56.0938 77.5967   3
  -3  -4  16-585.771 376.022   2
  -3  -4  15 8062.46 1103.82   2
   3   4 -15 10169.0 713.218   3
   3   4 -14 158.119 64.0741   3
  -3  -4  14 186.533 272.131   2
   3   4 -13 2794.50 308.284   3
  -3  -4  13 2855.23 627.172   2
   3   4 -12 1883.18 223.388   3
  -3  -4  12 3017.71 645.926   2
   3   4 -11 2373.32 238.685   3
  -3  -4  11 3277.54 643.887   2
  -3  -4  10 10016.5 1072.37   2
   3   4 -10 10479.2 1076.10   2
  -3  -4   9 1758.82 436.160   2
   3   4  -9 1408.31 364.910   2
  -3  -4   8 178.416 180.553   2
   3   4  -8 399.145 189.968   2
  -3  -4   7 109.344 106.310   2
   3   4  -7 171.915 89.1793   2
  -3  -4   6 280.019 149.594   2
  -3  -4   6 421.181 103.596   3
  -3  -4   5 7764.35 484.937   3
  -3  -4   5 9244.84 908.105   2
  -3  -4   4 25541.0 961.256   3
  -3  -4   4 23963.4 1432.88   2
  -3  -4   3 786.513 206.485   3
  -3  -4   3 515.969 234.599   2
  -3  -4   2 9452.18 739.392   3
  -3  -4   2 8010.44 834.475   2
  -3  -4   1 109.302 106.462   3
  -3  -4   1 239.164 247.236   1
  -3  -4   1 142.841 185.176   2
   3   4   0 16674.5 1203.47   1
  -3  -4   0 18257.7 1292.81   2
  -3  -4   0 15454.4 1203.15   1
   3   4   1 12742.7 1097.64   1
  -3  -4  -1 12574.7 1102.24   1
  -3  -4  -2 2549.22 479.881   1
   3   4   2 3453.52 564.335   1
   3   4   3 78024.5 2753.54   1
  -3  -4  -3 71964.7 2637.91   1
   3   4   4 1503.77 449.718   1
  -3  -4  -4 2154.95 492.543   1
  -3  -4  -5 5478.29 764.036   1
   3   4   5 4960.22 738.678   1
  -3  -4  -6 1112.84 387.044   1
   3   4   6 904.852 366.453   1
   3   4   7 3166.52 641.506   1
   3   4   8 10685.1 1202.72   1
   3   4   9 121.029 138.311   1
   3   4  10 33168.2 2251.90   1
   3   4  11 521.699 335.360   1
   3   4  12 812.399 442.288   1
   3   4  13 973.932 493.291   1
   3   4  14 457.781 308.662   1
   3   4  15 98.9314 169.497   1
   3   4  16 187.638 284.734   1
  -3  -5  20 1404.07 530.370   2
  -3  -5  19-119.622 253.742   2
  -3  -5  18 329.424 287.583   2
  -3  -5  17 1279.09 576.010   2
  -3  -5  16 299.123 412.992   2
   3   5 -16 165.950 98.3677   3
   3   5 -15 2482.94 330.825   3
  -3  -5  15 2731.72 670.096   2
  -3  -5  14 14125.1 1400.14   2
   3   5 -14 16098.9 807.493   3
  -3  -5  13 16348.6 1509.91   2
   3   5 -13 13155.8 678.059   3
  -3  -5  12 2723.30 655.222   2
   3   5 -12 2286.67 270.495   3
   3   5 -11 2238.33 243.324   3
  -3  -5  11 3002.17 637.721   2
   3   5 -10 45.2014 44.4109   3
  -3  -5  10-127.081 152.539   2
  -3  -5   9 2293.40 500.510   2
   3   5  -9 1569.77 199.264   3
   3   5  -9 1566.85 413.814   2
   3   5  -8 4588.20 345.717   3
   3   5  -8 4509.44 657.575   2
  -3  -5   8 4604.23 696.455   2
   3   5  -7 34565.0 1791.63   2
  -3  -5   7 30951.8 938.117   3
  -3  -5   6 24059.0 898.929   3
   3   5  -6 26557.1 1547.70   2
  -3  -5   5 22066.0 970.195   3
   3   5  -5 19620.9 1309.69   2
  -3  -5   5 20551.2 1349.59   2
  -3  -5   4 15575.0 858.527   3
   3   5  -4 13997.8 1060.32   2
  -3  -5   4 14010.5 1212.65   2
  -3  -5   3 4695.88 512.033   3
  -3  -5   3 4343.89 671.815   2
  -3  -5   2 1442.11 326.467   3
  -3  -5   2 1362.56 341.100   2
  -3  -5   1 46058.6 1865.59   3
  -3  -5   1 45370.1 2042.44   2
  -3  -5   0 258.722 94.5646   3
  -3  -5   0-122.923 196.645   2
   3   5   0 38.3706 109.951   1
  -3  -5  -1 1999.73 418.139   3
  -3  -5  -1 1451.05 417.612   1
   3   5   1 1683.87 417.616   1
   3   5   2 2366.38 499.435   1
  -3  -5  -2 2608.61 538.295   1
  -3  -5  -3 3235.39 577.474   1
   3   5   3 2351.35 520.245   1
   3   5   4 182.492 218.725   1
  -3  -5  -4 138.989 89.6100   1
   3   5   5 686.580 333.387   1
  -3  -5  -5 841.011 367.501   1
   3   5   6 3039.67 613.920   1
   3   5   7 243.051 247.246   1
   3   5   8 6130.90 948.098   1
   3   5   9 627.812 365.878   1
   3   5  10 18459.9 1788.13   1
   3   5  11 485.077 269.416   1
   3   5  12 1654.70 571.800   1
   3   5  13-11.1124 268.405   1
   3   5  14 1253.17 531.601   1
   3   5  15-59.1965 276.569   1
  -3  -6  20 4074.68 965.231   2
  -3  -6  19 783.171 318.278   2
  -3  -6  18 384.482 257.459   2
  -3  -6  17 6168.22 1081.03   2
  -3  -6  16 6463.06 1059.54   2
  -3  -6  15 191.846 121.452   2
   3   6 -15 6.71875 49.6311   3
   3   6 -14 14462.6 791.442   3
  -3  -6  14 12014.6 1328.56   2
   3   6 -13 15340.9 764.268   3
  -3  -6  13 13523.4 1445.62   2
  -3  -6  12 5241.96 886.172   2
   3   6 -12 4164.15 377.118   3
  -3  -6  11 6588.89 939.147   2
   3   6 -11 4487.46 379.298   3
  -3  -6  10 12825.6 1239.71   2
   3   6 -10 10390.9 586.271   3
   3   6  -9 1345.30 225.094   3
  -3  -6   9 1102.90 365.859   2
   3   6  -9 1655.09 400.368   2
  -3  -6   8 11786.3 661.570   3
   3   6  -8 15399.7 775.658   3
   3   6  -8 13952.7 1179.00   2
  -3  -6   8 12763.8 1137.68   2
  -3  -6   7 34.0385 78.8619   3
   3   6  -7 4.06601 132.575   2
  -3  -6   7 244.548 206.990   2
  -3  -6   6 76991.4 1899.30   3
  -3  -6   6 80674.5 2753.60   2
  -3  -6   5 324.356 122.890   3
  -3  -6   5 87.9952 121.412   2
  -3  -6   4 5872.51 587.123   3
   3   6  -4 5038.19 649.084   2
  -3  -6   4 5723.67 747.665   2
  -3  -6   3-121.495 200.122   2
  -3  -6   3 364.882 163.287   3
  -3  -6   2 159.801 143.631   3
  -3  -6   2 593.073 255.159   2
  -3  -6   1 10477.3 927.413   3
  -3  -6   1 10559.8 1027.73   2
  -3  -6   0 161.934 163.740   3
  -3  -6   0 113.858 165.155   2
   3   6   0 100.215 195.187   1
  -3  -6  -1 3448.03 617.845   3
   3   6   1 2593.79 589.623   1
  -3  -6  -1 3351.83 693.551   1
  -3  -6  -2 638.917 324.936   1
   3   6   2 279.289 138.167   1
  -3  -6  -2 222.052 179.030   3
  -3  -6  -3 3202.93 618.481   1
  -3  -6  -3 2527.00 548.933   3
   3   6   3 1758.66 452.444   1
  -3  -6  -4 456.046 243.676   3
  -3  -6  -4 772.645 313.104   1
   3   6   4 471.017 231.595   1
   3   6   5 319.658 224.792   1
   3   6   6 670.265 186.246   1
   3   6   7 4106.94 750.416   1
   3   6   8 26901.6 2053.31   1
   3   6   9 12456.2 1461.11   1
   3   6  10 1079.77 467.455   1
   3   6  11 2090.25 640.761   1
   3   6  12 427.665 417.023   1
   3   6  13-83.5383 219.708   1
   3   6  14-43.2295 310.386   1
   3   6  15-27.3066 177.746   1
  -3  -7  20 1085.00 577.589   2
  -3  -7  19-124.161 206.948   2
  -3  -7  18 797.754 432.353   2
  -3  -7  17 5738.72 1056.55   2
  -3  -7  16 12123.9 1452.56   2
   3   7 -15 902.025 199.457   3
  -3  -7  15 283.616 255.170   2
   3   7 -14-43.7015 43.9571   3
  -3  -7  14-252.298 230.046   2
   3   7 -13 1114.59 204.240   3
  -3  -7  13 1033.99 407.030   2
   3   7 -12 1571.94 247.662   3
  -3  -7  12 2421.59 581.869   2
  -3  -7  11-81.8969 148.322   2
   3   7 -11 47.6061 48.2816   3
   3   7 -10 4661.01 450.426   3
  -3  -7  10 4875.57 794.397   2
   3   7  -9 12868.8 753.961   3
  -3  -7   9 10353.0 697.169   3
   3   7  -9 12320.1 1160.43   2
  -3  -7   9 11543.9 1200.19   2
  -3  -7   8 7725.89 616.657   3
   3   7  -8 9888.46 712.307   3
   3   7  -8 7084.64 861.026   2
  -3  -7   8 8122.56 953.619   2
   3   7  -7 1113.69 254.608   3
  -3  -7   7 886.817 312.221   2
  -3  -7   7 1004.88 236.345   3
   3   7  -7 476.478 242.282   2
  -3  -7   6 5.52184 131.488   2
  -3  -7   6 225.430 99.8767   3
   3   7  -6 188.325 84.2186   2
  -3  -7   5 4129.04 545.857   3
   3   7  -5 4021.51 603.007   2
  -3  -7   5 3852.96 608.669   2
  -3  -7   4 4758.49 590.285   3
  -3  -7   4 4966.84 723.166   2
  -3  -7   3 1431.09 337.770   3
  -3  -7   3 1024.26 299.757   2
  -3  -7   2 3595.44 556.862   3
  -3  -7   2 4595.44 701.817   2
  -3  -7   1 5139.07 683.891   3
  -3  -7   1 5757.10 796.571   2
  -3  -7   0 40509.3 2008.92   3
  -3  -7   0 42166.6 2231.11   2
  -3  -7   0 46292.7 2474.24   1
  -3  -7  -1 14972.9 1246.42   3
   3   7   1 12739.3 1258.77   1
  -3  -7  -2 10823.7 1105.49   3
  -3  -7  -2 11663.8 1272.77   1
   3   7   2 9239.16 1049.33   1
   3   7   3 882.790 281.083   1
  -3  -7  -3 1052.45 361.610   3
   3   7   4-75.0670 164.341   1
   3   7   5 2458.66 536.512   1
   3   7   6 90.5656 260.956   1
   3   7   7 10046.1 1254.22   1
   3   7   8 1337.14 534.487   1
   3   7   9 6555.85 1131.84   1
   3   7  10 792.944 412.825   1
   3   7  11 942.787 480.294   1
   3   7  12 63.8479 295.123   1
   3   7  13-262.700 143.931   1
   3   7  14 186.578 144.518   1
  -3  -8  20 1170.86 543.730   2
  -3  -8  19-438.612 471.635   2
  -3  -8  18-31.6069 283.994   2
  -3  -8  17 1468.19 605.136   2
  -3  -8  16 628.210 332.710   2
  -3  -8  15-341.557 193.047   2
  -3  -8  14-200.608 261.367   2
   3   8 -14 84.3979 48.5395   3
   3   8 -13 1242.28 250.588   3
  -3  -8  13 358.032 250.150   2
   3   8 -12 561.508 172.695   3
  -3  -8  12-9.68932 203.535   2
  -3  -8  11 2098.97 539.597   2
   3   8 -11 1735.96 286.559   3
   3   8 -10-25.9528 48.7356   3
  -3  -8  10 52.0355 147.535   2
   3   8  -9 37.3779 49.9614   3
  -3  -8   9 196.294 250.892   2
  -3  -8   9 168.934 120.458   3
   3   8  -8 875.971 280.088   3
  -3  -8   8 684.869 325.210   2
  -3  -8   8 426.571 209.466   3
   3   8  -8 355.514 186.086   2
   3   8  -7 1057.77 257.485   3
  -3  -8   7 908.935 256.332   3
  -3  -8   7 969.694 342.237   2
   3   8  -7 809.922 301.828   2
  -3  -8   6 310.519 201.209   2
  -3  -8   6 576.273 205.342   3
   3   8  -6 256.131 182.150   2
  -3  -8   5 178.122 71.0780   3
  -3  -8   5 14.4434 183.890   1
  -3  -8   5 404.010 232.174   2
  -3  -8   4 14422.1 1127.93   3
  -3  -8   4 14317.5 1412.61   1
  -3  -8   4 14927.5 1266.39   2
  -3  -8   3 8973.84 902.101   3
  -3  -8   3 9289.35 1129.75   1
  -3  -8   3 9258.10 1019.59   2
  -3  -8   2 6371.20 777.820   3
  -3  -8   2 7772.39 1060.99   1
  -3  -8   2 7185.70 883.292   2
  -3  -8   1 418.498 365.198   1
  -3  -8   1 477.818 219.693   3
  -3  -8   1 733.537 287.760   2
  -3  -8   0 4619.38 742.357   2
  -3  -8   0 4286.87 672.800   3
  -3  -8  -1 214.768 135.061   3
   3   8   1-81.3339 255.665   1
  -3  -8  -2 393.797 224.807   3
   3   8   2 299.383 202.045   1
   3   8   3 4607.19 780.639   1
   3   8   4 23490.1 1817.36   1
   3   8   5 21401.0 1770.06   1
   3   8   6 488.124 301.319   1
   3   8   7 2442.62 640.881   1
   3   8   8 2806.97 708.196   1
   3   8   9 565.449 377.795   1
   3   8  10 645.794 296.022   1
   3   8  11 835.826 456.372   1
   3   8  12 3203.69 879.394   1
   3   8  13 3746.43 945.344   1
  -3  -9  19 1045.04 477.951   2
  -3  -9  18 1236.99 498.283   2
  -3  -9  17 636.355 352.229   2
  -3  -9  16-76.7867 167.945   2
  -3  -9  15 181.424 282.663   2
   3   9 -14 112.065 97.0140   3
  -3  -9  14-25.0676 215.723   2
   3   9 -13 2618.97 379.059   3
  -3  -9  13 2420.98 662.029   2
  -3  -9  12 442.240 302.203   2
   3   9 -12 630.325 196.951   3
  -3  -9  11 7589.17 1049.45   2
   3   9 -11 5791.22 596.685   3
   3   9 -10 1955.69 350.320   3
  -3  -9  10 1658.34 348.183   3
  -3  -9  10 1710.69 504.008   2
   3   9  -9 467.684 178.536   3
  -3  -9   9 127.361 105.419   3
  -3  -9   9 607.461 341.237   2
   3   9  -8 9494.74 846.060   3
  -3  -9   8 8030.49 794.430   3
  -3  -9   8 10017.8 1100.77   2
   3   9  -7 486.050 223.790   3
  -3  -9   7 633.096 229.867   2
  -3  -9   7 602.793 246.681   3
   3   9  -7 1055.92 336.882   2
  -3  -9   6 892.998 319.923   2
  -3  -9   6 815.140 265.355   3
  -3  -9   5 2344.64 471.501   3
  -3  -9   5 1959.03 467.333   2
  -3  -9   4 4680.63 685.437   3
  -3  -9   4 4325.11 723.557   2
  -3  -9   3 174.617 171.070   3
  -3  -9   3-250.978 298.009   2
  -3  -9   2 9066.01 990.824   3
  -3  -9   2 10257.2 1144.56   2
  -3  -9   1 5646.52 809.465   3
  -3  -9   1 5505.49 837.954   2
  -3  -9   0 1028.59 342.721   3
  -3  -9   0 1291.10 408.349   2
   3   9   1 5362.58 854.205   1
  -3  -9  -1 6653.56 974.195   2
   3   9   2 1429.45 368.748   1
   3   9   3 3941.26 774.715   1
   3   9   4 1873.97 506.803   1
   3   9   5 2822.24 670.957   1
   3   9   6 1903.91 537.506   1
   3   9   7 7962.94 1186.11   1
   3   9   8-915.851 420.716   1
   3   9   9 28.7270 336.509   1
   3   9  10 357.759 341.981   1
   3   9  11 1916.86 684.169   1
   3   9  12 1196.44 547.780   1
  -3 -10  19 1066.32 503.939   2
  -3 -10  18 602.313 399.293   2
  -3 -10  17-504.924 324.974   2
  -3 -10  16 15.8153 163.876   2
  -3 -10  15 325.900 206.001   2
  -3 -10  14 1670.78 569.999   2
  -3 -10  13 433.091 329.408   2
   3  10 -13 9.92165 93.9794   3
   3  10 -12 5.39899 55.5831   3
  -3 -10  12-197.634 277.828   2
   3  10 -11 39.8641 75.7153   3
  -3 -10  11-178.081 268.037   2
  -3 -10  11-89.2285 114.768   3
  -3 -10  10 11722.1 1285.27   2
  -3 -10  10 9160.97 880.749   3
   3  10  -9 14.8554 87.9295   3
  -3 -10   9 215.785 188.158   3
  -3 -10   8 940.411 329.869   3
  -3 -10   8 897.898 374.133   2
  -3 -10   7 2892.40 572.583   2
  -3 -10   7 2645.99 509.642   3
  -3 -10   6 57.0185 165.246   2
  -3 -10   6 422.535 163.059   3
  -3 -10   5 22413.1 1645.98   2
  -3 -10   5 19935.5 1470.14   3
  -3 -10   4 27792.1 1835.25   3
  -3 -10   4 27876.2 1877.02   2
  -3 -10   3 8902.62 1056.30   2
  -3 -10   3 9023.66 1045.65   3
  -3 -10   2 5411.11 825.264   3
  -3 -10   2 5139.71 814.847   2
  -3 -10   1 36082.0 2157.98   3
  -3 -10   1 43710.9 2503.26   2
  -3 -10   0 3059.65 677.246   2
   3  10   1 4212.77 759.896   1
  -3 -10  -1 5487.87 880.688   2
   3  10   2 8518.78 1172.91   1
   3  10   3 6268.60 982.375   1
   3  10   4-15.5460 175.197   1
   3  10   5 679.071 412.169   1
   3  10   6 12713.1 1528.92   1
   3  10   7 4220.92 896.453   1
   3  10   8 2697.87 712.176   1
   3  10   9-41.9034 260.446   1
   3  10  10 368.587 291.181   1
   3  10  11-321.644 331.993   1
  -3 -11  19 245.354 182.753   2
  -3 -11  18 2741.94 761.303   2
  -3 -11  17-30.5315 226.802   2
  -3 -11  16 343.670 263.207   2
  -3 -11  15 4277.42 901.097   2
  -3 -11  14 3711.37 864.871   2
   3  11 -13 303.846 132.099   3
  -3 -11  13-98.5000 217.096   2
  -3 -11  12 99.0965 166.351   2
  -3 -11  11 1882.19 529.475   2
  -3 -11  10 1077.59 485.810   2
  -3 -11  10 173.303 199.798   3
  -3 -11   9 2309.99 471.966   3
  -3 -11   9 3120.39 656.501   2
  -3 -11   8-104.718 244.196   2
  -3 -11   8 239.081 196.759   3
  -3 -11   7 1429.35 458.027   2
  -3 -11   7 1203.13 353.026   3
  -3 -11   6 9536.40 1059.39   3
  -3 -11   6 10306.3 1149.35   2
  -3 -11   5-210.471 211.364   3
  -3 -11   5-19.1019 179.224   2
  -3 -11   4-118.516 227.222   3
  -3 -11   4-460.393 298.348   2
  -3 -11   3 7969.49 1052.75   3
  -3 -11   3 8452.73 1084.59   2
  -3 -11   2 751.508 330.683   2
  -3 -11   1 18833.7 1702.79   2
  -3 -11   0 1049.32 413.399   2
  -3 -11  -1 6411.04 998.716   2
   3  11   2 9013.45 1232.65   1
  -3 -11  -2 9762.55 1279.97   2
   3  11   3 3409.79 785.386   1
   3  11   4 8996.60 1273.64   1
   3  11   5 1373.53 509.427   1
   3  11   6 537.642 341.976   1
   3  11   7 1230.07 532.314   1
   3  11   8 1144.01 518.610   1
   3  11   9 3797.75 914.275   1
   3  11  10 536.168 427.695   1
  -3 -12  18-95.5322 398.752   2
  -3 -12  17 1891.48 624.516   2
  -3 -12  16 525.442 323.933   2
  -3 -12  15 565.005 337.921   2
  -3 -12  14-113.906 238.362   2
  -3 -12  13-182.801 236.251   2
  -3 -12  12-328.691 400.423   2
  -3 -12  11 465.376 294.558   2
   3  12 -10 4916.78 730.567   3
  -3 -12  10 5969.79 1000.35   2
   3  12  -9 1782.38 450.837   3
  -3 -12   9 1395.21 459.730   2
  -3 -12   9 1601.75 472.678   3
   3  12  -8 1892.70 466.699   3
  -3 -12   8 1496.74 434.717   2
  -3 -12   8 1799.10 487.988   3
   3  12  -7 5746.82 810.888   3
  -3 -12   7 4682.01 773.855   3
  -3 -12   7 5180.52 875.325   2
  -3 -12   6 1934.40 508.709   3
  -3 -12   6 2500.97 593.025   2
  -3 -12   5 1054.88 358.020   3
  -3 -12   5 663.799 360.909   2
  -3 -12   4 1167.02 338.485   2
  -3 -12   3 5442.40 906.703   2
  -3 -12   2 2149.38 684.290   2
  -3 -12   1 10758.1 1337.83   2
  -3 -12   0 15249.9 1591.63   2
  -3 -12  -1 1372.93 491.384   2
   3  12   2 1858.37 579.943   1
  -3 -12  -2 1563.03 534.224   2
   3  12   3 9856.82 1349.72   1
   3  12   4 2935.76 748.527   1
   3  12   5 397.692 349.789   1
   3  12   6 103.718 167.965   1
   3  12   7 3364.12 844.587   1
   3  12   8-52.3595 196.433   1
   3  12   9 148.309 239.878   1
  -3 -13  18 2572.21 879.047   2
  -3 -13  17-170.471 297.383   2
  -3 -13  16 1356.93 526.460   2
  -3 -13  15 31.6794 204.980   2
  -3 -13  14 128.891 267.770   2
  -3 -13  13-572.998 343.683   2
  -3 -13  12-273.885 302.997   2
  -3 -13  11-27.6709 159.710   2
   3  13 -11 50.7705 201.208   3
   3  13 -10 1123.49 424.640   3
  -3 -13  10 1033.22 488.107   2
   3  13  -9 2768.21 554.558   3
  -3 -13   9 3374.28 747.400   2
  -3 -13   8 1544.68 515.567   2
   3  13  -8 1551.54 404.160   3
   3  13  -7 2189.12 496.388   3
  -3 -13   7 1797.70 522.983   2
  -3 -13   6-184.334 230.608   2
  -3 -13   5 1830.82 538.419   2
  -3 -13   4-130.718 195.500   2
  -3 -13   3 4517.18 848.764   2
  -3 -13   2 189.196 247.225   2
  -3 -13   1 4684.23 899.498   2
  -3 -13   0 620.936 277.022   2
  -3 -13  -1-220.053 261.608   2
  -3 -13  -2 3997.84 893.651   2
   3  13   3 103.089 176.647   1
  -3 -13  -3 262.808 269.006   2
   3  13   4 342.033 370.180   1
   3  13   5-187.494 281.405   1
   3  13   6 2106.35 663.816   1
   3  13   7 1518.43 607.187   1
   3  13   8 125.186 249.816   1
  -3 -14  17 1695.28 581.200   2
  -3 -14  16-461.829 347.589   2
  -3 -14  15 982.774 501.168   2
  -3 -14  14 95.9429 175.918   2
  -3 -14  13 393.389 252.888   2
  -3 -14  12 1056.34 490.501   2
   3  14 -11-130.010 120.204   3
  -3 -14  11 205.047 166.253   2
   3  14 -10 673.322 323.913   3
  -3 -14  10 282.797 110.581   2
  -3 -14   9 1684.41 565.094   2
   3  14  -9 1552.28 457.967   3
   3  14  -8 531.411 237.016   3
  -3 -14   8 1036.07 411.114   2
  -3 -14   7 947.752 435.484   2
  -3 -14   6 1067.68 417.358   2
  -3 -14   5 19.9256 288.454   2
  -3 -14   4 2795.81 662.612   2
  -3 -14   3 407.468 325.441   2
  -3 -14   2-346.841 268.648   2
  -3 -14   1-137.010 262.914   2
  -3 -14   0-257.140 231.601   2
  -3 -14  -1 2286.74 674.937   2
  -3 -14  -2 72.8605 236.233   2
  -3 -14  -3 328.095 253.200   2
  -3 -14  -4-188.476 171.315   2
   3  14   4-14.5787 237.117   1
   3  14   5 228.799 167.474   1
   3  14   6 166.754 233.918   1
  -3 -15  16 161.798 207.820   2
  -3 -15  15 300.930 292.334   2
  -3 -15  14 1413.74 681.269   2
  -3 -15  13 470.184 329.439   2
  -3 -15  12 538.105 349.641   2
  -3 -15  11 1289.30 519.020   2
   3  15 -10 1363.27 467.128   3
  -3 -15  10 970.189 530.804   2
   3  15  -9 5871.32 914.659   3
  -3 -15   9 6820.62 1115.98   2
  -3 -15   8 431.513 305.065   2
  -3 -15   7 249.399 229.821   2
  -3 -15   6-82.6769 232.793   2
  -3 -15   5 904.568 414.558   2
  -3 -15   4 1721.62 572.943   2
  -3 -15   3 1441.53 664.214   2
  -3 -15   2 4236.17 947.575   2
  -3 -15   1 2031.09 653.287   2
  -3 -15   0 18.5901 250.533   2
  -3 -15  -1 331.732 300.685   2
  -3 -15  -2 3640.69 871.495   2
  -3 -15  -3 107.811 278.812   2
  -3 -15  -4 267.609 183.383   2
  -3 -15  -5-1136.46 542.266   2
   3  15   5-246.236 357.484   1
  -3 -16  13-361.011 441.358   2
  -3 -16  12-580.140 370.701   2
  -3 -16  11 43.7486 247.245   2
  -3 -16  10 519.990 359.584   2
  -3 -16   9 7006.73 1152.17   2
  -3 -16   8 302.698 272.448   2
  -3 -16   7 199.058 229.579   2
  -3 -16   6 22.4514 164.834   2
  -3 -16   5 430.512 337.842   2
  -3 -16   4 426.230 308.624   2
  -3 -16   3 1635.37 636.425   2
  -3 -16   2 4281.89 931.831   2
  -3 -16   1-310.234 196.008   2
  -3 -16   0-249.849 291.068   2
  -3 -16  -1 1897.64 679.775   2
  -3 -16  -2 981.698 519.036   2
  -3 -16  -3 204.611 342.283   2
  -3 -16  -4 1381.57 659.595   2
  -3 -16  -5 524.601 324.601   2
  -3 -16  -6-396.489 406.887   2
  -3 -17   9 747.243 396.711   2
  -3 -17   8 962.995 489.579   2
  -3 -17   7 995.056 438.140   2
  -3 -17   6 3270.18 795.793   2
  -3 -17   5 3337.09 786.852   2
  -3 -17   4 681.643 434.405   2
  -3 -17   3 740.747 381.617   2
  -3 -17   2 821.771 498.442   2
  -3 -17   1 3327.06 867.215   2
  -3 -17   0-293.773 221.653   2
  -3 -17  -1 672.529 458.761   2
  -3 -17  -2 261.503 378.713   2
  -3 -17  -3 1944.95 772.262   2
  -3 -17  -4 2128.16 857.144   2
  -4  19   3 382.618 324.986   3
  -4  19   2-0.94969 207.262   3
  -4  19   1 439.930 329.703   3
  -4  19   0 3252.63 848.256   3
  -4  19  -1 552.302 380.079   3
  -4  19  -2 282.762 365.032   3
  -4  19  -3 1516.72 591.691   3
  -4  19  -4 1143.41 539.003   3
  -4  19  -5 1197.50 573.769   3
  -4  19  -6 409.725 368.590   3
  -4  19  -7 1199.00 573.774   3
  -4  18   6 805.439 411.143   3
  -4  18   5 1376.59 568.695   3
  -4  18   4-139.552 287.485   3
  -4  18   3 629.413 372.704   3
  -4  18   2 2233.35 690.225   3
  -4  18   1 1081.48 552.144   3
  -4  18   0 246.775 215.216   3
  -4  18  -1 3120.34 804.318   3
  -4  18  -2 797.060 474.830   3
  -4  18  -3 1509.55 575.253   3
  -4  18  -4-77.6850 258.726   3
  -4  18  -5 2470.08 695.870   3
  -4  18  -6 360.407 328.423   3
  -4  18  -7 2787.95 787.598   3
  -4  18  -8 355.584 269.707   3
  -4  18  -9 1778.20 638.618   3
  -4  18 -10-97.1118 328.287   3
  -4  17  11-57.3711 224.490   1
  -4  17  10 361.177 272.560   1
  -4  17   9 210.060 151.484   3
  -4  17   9 516.308 376.457   1
  -4  17   8 3748.49 935.932   3
  -4  17   8 4975.18 895.589   1
  -4  17   7 2774.03 826.024   3
  -4  17   7 1611.17 515.088   1
  -4  17   6-60.6679 92.7660   1
  -4  17   6 366.938 224.069   3
  -4  17   5 186.174 169.214   3
  -4  17   5 585.107 274.355   1
  -4  17   4-8.44934 133.553   3
  -4  17   3 225.840 258.786   3
  -4  17   2 426.560 292.836   3
  -4  17   1 264.512 268.389   3
  -4  17   0 449.463 315.120   3
  -4  17  -1 506.000 343.180   3
  -4  17  -2 389.999 276.101   3
  -4  17  -3 401.663 250.541   3
  -4  17  -4 5568.97 1046.57   3
  -4  17  -5 322.170 349.733   3
  -4  17  -6 297.296 339.173   3
  -4  17  -7 421.708 409.808   3
  -4  17  -8 3029.36 784.169   3
  -4  17  -9 103.947 129.588   3
  -4  17 -10 7.65564 312.172   3
  -4  17 -11 1966.07 659.200   3
  -4  17 -12 347.552 449.451   3
  -4  16  13-124.477 146.400   1
  -4  16  12 1661.68 573.943   1
  -4  16  11 2.37221 188.569   1
  -4  16  10-437.088 291.650   1
  -4  16   9 1738.63 608.621   3
  -4  16   9 2058.14 619.777   1
  -4  16   8 2682.22 789.505   3
  -4  16   8 1855.96 517.722   1
  -4  16   7 94.4874 156.275   1
  -4  16   7 439.639 342.014   3
  -4  16   6 303.653 349.745   3
  -4  16   6-32.3568 160.241   1
  -4  16   5 119.688 311.585   3
  -4  16   5-204.525 215.247   1
  -4  16   4 883.669 398.223   3
  -4  16   3 204.776 313.917   3
  -4  16   2-41.7973 260.872   3
  -4  16   1 1970.41 589.210   3
  -4  16   0 4579.31 882.523   3
  -4  16  -1 1970.00 601.294   3
  -4  16  -2 1994.09 610.615   3
  -4  16  -3 1168.39 574.576   3
  -4  16  -4 3798.49 873.366   3
  -4  16  -5 1246.62 486.806   3
  -4  16  -6 7450.13 1288.19   3
  -4  16  -7 2282.52 729.392   3
  -4  16  -8 1920.53 627.561   3
  -4  16  -9 226.745 244.809   3
  -4  16 -10 893.472 448.693   3
  -4  16 -11 4004.64 953.676   3
  -4  16 -12 2850.17 782.221   3
  -4  16 -13 924.551 484.125   3
  -4  15  14-215.008 305.057   1
  -4  15  13 365.061 299.785   1
  -4  15  12 923.042 383.544   1
  -4  15  11 1317.79 548.987   1
  -4  15  10 72.6960 169.401   1
  -4  15   9 2100.78 676.946   3
  -4  15   9 1894.88 535.534   1
  -4  15   8 241.424 272.671   1
  -4  15   8-166.986 187.405   3
  -4  15   7 1067.52 472.556   3
  -4  15   7 884.726 371.460   1
  -4  15   6 386.508 197.625   1
  -4  15   6 459.667 331.319   3
  -4  15   5 1632.78 587.093   3
  -4  15   5 818.176 319.299   1
  -4  15   4 131.856 303.682   3
  -4  15   4 351.370 247.735   1
  -4  15   3 42.8902 143.520   3
   4 -15  -3 677.878 315.158   1
  -4  15   2 1129.39 419.141   3
  -4  15   1 6970.29 1098.78   3
  -4  15   0 5509.36 979.521   3
  -4  15  -1 810.382 322.767   3
   4 -15   1 1152.64 367.185   1
  -4  15  -2 2494.74 668.072   3
   4 -15   2 652.699 283.824   1
   4 -15   3 559.489 265.360   1
  -4  15  -3 3382.98 818.173   3
  -4  15  -4 1362.30 523.928   3
  -4  15  -5 1302.74 543.371   3
  -4  15  -6 7523.13 1194.61   3
  -4  15  -7 6892.49 1134.25   3
  -4  15  -8 2026.49 634.244   3
  -4  15  -9 993.091 539.537   3
  -4  15 -10 177.153 234.015   3
  -4  15 -11 501.483 498.430   3
  -4  15 -12 133.606 128.694   3
  -4  15 -13 228.898 301.238   3
  -4  15 -14 390.862 371.586   3
  -4  14  15 447.111 409.788   1
  -4  14  14 3000.40 818.368   1
  -4  14  13-333.562 260.311   1
  -4  14  12 407.609 364.454   1
  -4  14  11 2526.61 705.385   1
  -4  14  10 149.662 154.922   1
  -4  14   9 394.734 206.311   3
  -4  14   9 198.035 137.467   1
  -4  14   8 183.987 224.745   1
  -4  14   8 744.063 320.935   3
  -4  14   7 545.035 315.913   1
  -4  14   7 375.261 315.015   3
  -4  14   6 1240.52 503.391   3
  -4  14   6 953.257 338.991   1
   4 -14  -5 1690.17 442.319   1
  -4  14   5 1886.34 538.775   3
  -4  14   5 945.907 362.389   1
  -4  14   4 3198.06 733.960   3
  -4  14   4 3714.40 599.637   1
   4 -14  -4 4256.84 694.659   1
  -4  14   3 1069.02 503.105   3
  -4  14   2 2105.47 591.719   3
  -4  14   1 901.108 485.912   3
   4 -14  -1 144.821 167.008   1
  -4  14   0 8800.00 1174.59   3
   4 -14   0 3359.13 564.072   1
   4 -14   1 13496.7 1077.82   1
  -4  14  -1 18460.0 1702.39   3
   4 -14   2 10054.5 918.164   1
  -4  14  -2 13624.5 1506.61   3
   4 -14   3 26907.7 1548.30   1
  -4  14  -3 33948.1 2425.75   3
   4 -14   4 6882.42 788.258   1
  -4  14  -4 8265.14 1256.56   3
   4 -14   5 587.339 240.033   1
  -4  14  -5 1860.90 560.168   3
  -4  14  -6 1144.95 449.490   3
   4 -14   6 420.838 220.091   1
  -4  14  -7 555.382 273.874   3
  -4  14  -8 1913.43 626.540   3
  -4  14  -9 2867.65 755.268   3
  -4  14 -10 3131.24 814.760   3
  -4  14 -11 2099.61 639.202   3
  -4  14 -12 321.200 309.030   3
  -4  14 -13 793.226 391.272   3
  -4  14 -14 453.744 173.863   3
  -4  14 -15 786.387 455.664   3
  -4  13  16-268.378 217.278   1
  -4  13  15 776.113 499.660   1
  -4  13  14 36.8711 298.237   1
  -4  13  13 285.595 275.169   1
  -4  13  12 3427.91 782.482   1
  -4  13  11 307.811 334.181   1
  -4  13  10-189.074 230.152   1
  -4  13   9 338.832 185.819   3
  -4  13   9-378.578 279.066   1
  -4  13   8 11.1229 129.964   3
   4 -13  -8-215.262 238.658   2
  -4  13   8 64.8118 103.700   1
  -4  13   7 3040.88 712.833   3
  -4  13   7 4017.67 680.078   1
   4 -13  -7 4607.04 805.188   1
  -4  13   6 3212.77 711.662   3
  -4  13   6 3454.90 596.789   1
   4 -13  -6 4258.57 747.693   1
   4 -13  -5 1374.25 400.804   1
  -4  13   5 2293.24 625.616   3
   4 -13  -5 1136.55 249.260   2
  -4  13   5 1539.03 415.499   1
  -4  13   4 7634.83 1068.31   3
  -4  13   4 7251.09 809.324   1
   4 -13  -4 4608.99 428.123   2
  -4  13   3 1681.18 542.246   3
  -4  13   3 2182.45 503.596   1
  -4  13   2 9852.75 1139.26   3
   4 -13  -2 4138.27 604.633   1
  -4  13   1 7119.68 1040.46   3
   4 -13  -1 3208.75 530.333   1
  -4  13   0 5966.33 948.611   3
   4 -13   0 5074.69 615.558   1
   4 -13   1 5520.59 637.604   1
  -4  13  -1 6898.98 1026.11   3
   4 -13   2 10687.5 872.636   1
  -4  13  -2 12741.8 1415.24   3
  -4  13  -3 16256.7 1590.87   3
   4 -13   3 15496.0 1091.20   1
  -4  13  -4 5092.82 949.169   3
   4 -13   4 6410.76 731.741   1
  -4  13  -5 722.944 413.974   3
   4 -13   5 687.009 240.025   1
  -4  13  -6-75.9573 206.718   3
   4 -13   6 102.277 131.959   1
  -4  13  -7 4481.13 857.086   3
   4 -13   7 606.198 263.421   1
  -4  13  -8 6399.24 1093.60   3
  -4  13  -9 323.769 332.140   3
  -4  13 -10 4042.09 867.884   3
  -4  13 -11 252.705 223.261   3
  -4  13 -12-133.684 215.258   3
  -4  13 -13 3118.32 788.573   3
   4 -13  13 3353.10 708.801   1
  -4  13 -14 818.466 474.609   3
  -4  13 -15 3591.91 916.677   3
  -4  13 -16 123.764 291.397   3
  -4  12  16-331.646 293.401   1
  -4  12  15 612.293 357.984   1
  -4  12  14 374.540 362.322   1
  -4  12  13 240.986 339.792   1
  -4  12  12 1841.68 597.636   1
  -4  12  11 1977.08 543.744   1
  -4  12  10-300.910 281.219   3
  -4  12  10 86.5344 190.043   1
  -4  12   9 975.239 438.022   3
   4 -12  -9 872.059 347.844   2
  -4  12   9 752.877 379.950   1
  -4  12   8 156.729 284.570   3
   4 -12  -8 53.3400 114.202   2
  -4  12   8 229.557 208.676   1
  -4  12   7 7552.82 1064.17   3
  -4  12   7 7235.55 912.039   1
  -4  12   6 2253.63 478.914   1
  -4  12   6 2575.62 647.816   3
   4 -12  -6 734.430 254.314   2
   4 -12  -6 1182.03 388.691   1
   4 -12  -5 85.0776 63.5618   2
  -4  12   5 104.247 149.816   3
  -4  12   5 145.628 192.536   1
   4 -12  -4 642.413 152.330   2
  -4  12   4 428.354 214.277   3
   4 -12  -4 27.0007 135.091   1
  -4  12   4 462.283 203.609   1
  -4  12   3 20812.3 1662.40   3
  -4  12   3 20238.0 1198.94   1
   4 -12  -3 18184.7 1218.04   1
  -4  12   2 20934.8 1674.78   3
   4 -12  -2 13980.0 994.928   1
  -4  12   1 7926.51 1043.64   3
   4 -12  -1 4952.99 596.561   1
   4 -12   0 944.319 279.385   1
  -4  12   0 337.345 460.481   3
  -4  12  -1 9984.63 1188.53   3
   4 -12   1 7727.22 656.079   1
  -4  12  -2 11360.9 1252.03   3
   4 -12   2 9031.60 732.052   1
  -4  12  -3 8075.18 1080.35   3
   4 -12   3 7440.27 689.539   1
  -4  12  -4 984.868 450.219   3
   4 -12   4 1571.42 361.973   1
  -4  12  -5 6103.05 980.311   3
   4 -12   5 4331.24 550.640   1
  -4  12  -6 4724.48 837.065   3
   4 -12   6 3848.58 531.075   1
  -4  12  -7 880.733 163.943   2
  -4  12  -7 1036.47 384.421   3
  -4  12  -8 576.932 158.543   2
  -4  12  -8 853.222 536.179   3
  -4  12  -9 11.0175 162.706   3
  -4  12 -10 264.623 256.051   3
  -4  12 -11-364.147 377.550   3
  -4  12 -12-77.0539 244.523   3
   4 -12  12 33.3859 154.350   1
   4 -12  13 221.386 180.955   1
  -4  12 -13 287.701 268.599   3
  -4  12 -14 742.879 424.729   3
   4 -12  14 454.954 301.510   1
  -4  12 -15 6014.77 1161.49   3
   4 -12  15 8875.42 1248.93   1
  -4  12 -16 229.341 286.387   3
  -4  11  17 748.537 439.653   1
  -4  11  16 69.3678 138.783   1
  -4  11  15 1629.98 575.131   1
  -4  11  14 2852.47 727.876   1
  -4  11  13 361.358 257.827   1
  -4  11  12 242.480 352.702   1
  -4  11  11 223.615 240.852   1
  -4  11  10 1081.78 378.059   3
  -4  11  10 763.142 284.405   1
   4 -11  -9 140.177 106.062   2
  -4  11   9 119.643 305.185   3
  -4  11   9 201.278 215.600   1
  -4  11   8 2825.14 685.491   3
   4 -11  -8 2356.36 517.547   2
  -4  11   8 2536.23 545.830   1
  -4  11   7 14287.0 1394.46   3
  -4  11   7 12987.8 1150.16   1
   4 -11  -6 111.963 90.5942   2
  -4  11   6 709.344 342.234   3
  -4  11   6 488.187 173.880   1
  -4  11   5 10750.2 1144.05   3
  -4  11   5 10521.1 952.901   1
   4 -11  -5 7907.77 692.319   2
   4 -11  -4 255.829 207.031   1
   4 -11  -4 41.7407 91.9025   2
  -4  11   4 280.022 200.129   3
  -4  11   4 604.303 303.638   1
  -4  11   3 27310.6 1795.40   3
  -4  11   3 26883.7 1290.61   1
  -4  11   2 1378.69 1047.01   3
   4 -11  -2 1418.98 352.138   1
   4 -11  -1 836.791 202.750   1
  -4  11   1 1121.50 391.363   3
  -4  11   0 33636.3 2106.96   3
   4 -11   0 25725.9 1086.07   1
   4 -11   1 7630.39 663.655   1
  -4  11  -1 4460.42 765.614   3
   4 -11   2 24043.2 1025.41   1
  -4  11  -2 29348.8 1965.71   3
  -4  11  -3 5278.37 1048.22   3
   4 -11   3 3347.67 631.081   1
  -4  11  -4 2429.11 598.455   3
   4 -11   4 1769.02 316.308   1
  -4  11  -5 56.8083 172.053   3
   4 -11   5-63.0007 62.2895   1
  -4  11  -6 765.879 266.916   3
  -4  11  -6 614.249 131.651   2
  -4  11  -7 15197.1 807.050   2
  -4  11  -7 15063.3 1532.54   3
  -4  11  -8 196.903 132.404   2
  -4  11  -8 340.849 378.671   3
  -4  11  -9 2847.04 434.408   2
  -4  11  -9 2519.18 676.480   3
  -4  11 -10 11116.4 961.703   2
  -4  11 -10 11181.9 1396.28   3
   4 -11  10 8703.62 973.347   1
  -4  11 -11 6845.90 1122.07   3
   4 -11  11 5576.84 840.568   1
   4 -11  12 758.798 380.635   1
  -4  11 -12 1288.65 517.134   3
   4 -11  13-40.0206 181.768   1
  -4  11 -13 342.835 216.962   3
   4 -11  14 48.5152 123.236   1
  -4  11 -14 409.994 317.285   3
   4 -11  15 284.698 334.512   1
  -4  11 -15-358.500 341.977   3
   4 -11  16 1163.18 567.491   1
  -4  11 -16 623.339 315.907   3
  -4  11 -17 375.053 372.254   3
  -4  10  17 31.9487 190.345   1
  -4  10  16 124.047 319.128   1
  -4  10  15 102.959 298.958   1
  -4  10  14 890.943 427.081   1
  -4  10  13 3742.35 789.327   1
  -4  10  12 11471.2 1265.94   1
  -4  10  11 466.205 283.944   1
  -4  10  10 300.403 151.762   3
   4 -10 -10 325.511 169.501   2
  -4  10  10 395.019 262.683   1
  -4  10   9 75.8717 224.434   3
  -4  10   9 110.574 177.137   1
   4 -10  -9 439.487 294.102   2
  -4  10   8 6853.41 849.023   1
  -4  10   8 7514.70 986.177   3
   4 -10  -8 5609.33 787.935   2
  -4  10   7 409.756 312.078   3
  -4  10   7 436.059 142.356   1
   4 -10  -6 396.999 203.666   2
  -4  10   6 514.117 220.935   3
  -4  10   6 619.474 247.521   1
  -4  10   5 28351.7 1794.14   3
   4 -10  -5 32401.5 2124.34   3
  -4  10   5 29644.6 1508.75   1
  -4  10   4 2374.34 542.809   3
   4 -10  -4 3091.59 671.047   3
   4 -10  -4 2448.54 353.707   2
  -4  10   4 3636.58 548.111   1
  -4  10   3 12218.7 820.625   1
  -4  10   3 12992.7 1224.36   3
   4 -10  -3 12722.6 686.037   2
   4 -10  -3 13805.7 890.876   1
   4 -10  -3 14561.8 1405.07   3
   4 -10  -2 3665.03 758.528   3
   4 -10  -2 1863.51 206.570   2
  -4  10   2 2883.64 361.281   1
   4 -10  -2 2882.20 369.236   1
  -4  10   2 3022.37 808.815   3
   4 -10  -1 270.083 137.010   1
  -4  10   1 104.529 197.254   3
   4 -10  -1 411.072 258.900   3
  -4  10   0 20605.9 1561.65   3
   4 -10   0 19915.7 1625.90   3
   4 -10   0 20210.9 802.163   1
  -4  10  -1 650.104 388.941   3
   4 -10   1 401.093 265.752   3
  -4  10  -2 4617.55 768.635   3
   4 -10   2 4387.13 370.197   1
  -4  10  -3 4716.19 810.977   3
   4 -10   3 4397.32 422.979   1
  -4  10  -4 13678.2 466.860   2
   4 -10   4 13086.6 766.909   1
  -4  10  -4 11370.5 410.176   2
  -4  10  -5 4691.53 389.429   2
  -4  10  -5 4811.36 841.909   3
  -4  10  -6 4792.41 451.445   2
  -4  10  -6 4175.36 793.132   3
  -4  10  -7 5147.50 865.611   3
  -4  10  -7 5669.45 549.916   2
  -4  10  -8 7298.34 675.834   2
  -4  10  -8 6526.60 995.935   3
   4 -10   8 5286.04 655.940   1
  -4  10  -9 865.848 217.328   2
  -4  10  -9 1514.33 542.657   3
   4 -10   9 810.772 282.759   1
  -4  10 -10 6494.30 755.905   2
  -4  10 -10 6395.96 1053.17   3
   4 -10  10 4308.17 673.555   1
  -4  10 -11-5.18235 142.487   2
   4 -10  11 48.4054 143.069   1
  -4  10 -11 370.476 188.732   3
   4 -10  12 1534.02 448.028   1
  -4  10 -12 1733.37 542.003   3
   4 -10  13 103.472 170.567   1
  -4  10 -13-267.897 369.255   3
   4 -10  14 1338.72 450.002   1
  -4  10 -14 2078.46 641.974   3
  -4  10 -15 22.7901 177.685   3
   4 -10  15-213.863 245.534   1
   4 -10  16 750.540 378.518   1
  -4  10 -16 1070.84 510.201   3
   4 -10  17 39.9326 171.845   1
  -4  10 -17 168.909 281.926   3
  -4   9  18 766.171 409.373   1
  -4   9  17 2578.56 714.108   1
  -4   9  16 3299.68 825.764   1
  -4   9  15 642.742 376.655   1
  -4   9  14-73.2297 122.281   1
  -4   9  13 158.418 208.069   1
  -4   9  12 6802.83 1015.92   1
  -4   9  11 709.286 250.925   1
  -4   9  10 7552.62 1015.20   3
  -4   9  10 5929.22 860.654   1
   4  -9 -10 7997.36 1050.14   2
  -4   9   9 9112.38 965.531   1
  -4   9   9 11239.4 1208.26   3
   4  -9  -9 8050.13 983.265   2
  -4   9   8 27641.2 1606.99   1
   4  -9  -8 30739.6 2038.08   3
  -4   9   8 31710.4 1940.93   3
  -4   9   7 598.518 319.051   3
   4  -9  -7 245.163 125.941   3
  -4   9   7 25.3950 126.133   2
  -4   9   7 399.189 271.454   1
  -4   9   6 2142.40 404.773   1
   4  -9  -6 1351.10 324.019   2
  -4   9   6 1656.87 426.650   3
   4  -9  -6 1753.82 476.740   3
  -4   9   6 1497.14 280.572   2
  -4   9   5 32584.1 1826.42   3
   4  -9  -5 27174.5 1839.24   3
  -4   9   5 32238.8 1470.23   1
  -4   9   5 25836.8 1163.20   2
   4  -9  -5 33901.8 1440.72   2
   4  -9  -4 1038.33 236.286   2
  -4   9   4 1181.35 358.051   3
   4  -9  -4 639.176 315.882   3
  -4   9   4 1555.96 348.114   1
  -4   9   4 836.444 218.936   2
  -4   9   3 31542.3 1036.94   2
   4  -9  -3 35575.1 1195.65   2
  -4   9   3 35232.5 1914.72   3
  -4   9   3 36517.0 1295.49   1
  -4   9   2 88.1604 153.822   3
   4  -9  -2-19.7733 74.9555   3
  -4   9   2 7.77662 78.2211   1
  -4   9   2 186.943 117.586   2
   4  -9  -2 107.342 68.7353   2
   4  -9  -1 13360.7 1267.53   3
  -4   9   1 14174.3 481.484   2
  -4   9   1 18210.7 1416.64   3
   4  -9  -1 18377.9 706.113   1
  -4   9   0 1046.72 425.966   3
   4  -9   0 1596.76 432.045   3
   4  -9   0 1617.91 209.836   1
   4  -9   1 149.892 48.8722   1
   4  -9   1-23.2286 86.1664   3
  -4   9  -2 60.8398 127.837   3
   4  -9   2-76.5128 131.102   3
   4  -9   2 67.2158 34.1948   1
   4  -9   3 2063.54 244.248   1
  -4   9  -3 1722.89 177.160   2
  -4   9  -3 2085.08 472.197   3
   4  -9   3 2023.91 489.749   3
  -4   9  -3 1560.62 183.462   2
  -4   9  -4 12819.7 1277.69   3
  -4   9  -4 11124.9 560.650   2
  -4   9  -5 4206.04 413.131   2
  -4   9  -5 3747.79 694.878   3
  -4   9  -6 260.826 206.548   3
  -4   9  -6 291.943 178.507   2
   4  -9   6 413.550 187.175   1
  -4   9  -7 5924.02 583.091   2
  -4   9  -7 6237.05 961.239   3
   4  -9   7 5020.26 591.693   1
  -4   9  -8 91.4781 129.720   3
  -4   9  -8 47.9826 123.080   2
   4  -9   8 180.884 156.977   1
  -4   9  -9 21393.5 1221.38   2
   4  -9   9 21433.8 1407.98   1
   4  -9  10 1218.63 395.675   1
  -4   9 -10 1225.80 330.468   2
  -4   9 -10 1616.24 569.936   3
   4  -9  11 24.2929 88.1289   1
  -4   9 -11 149.750 127.119   2
  -4   9 -11 222.623 198.053   3
   4  -9  12 825.344 315.135   1
  -4   9 -12 1168.22 484.123   3
   4  -9  13 1090.80 419.029   1
  -4   9 -13 232.870 259.409   3
   4  -9  14-283.827 320.525   1
  -4   9 -14 85.3781 193.144   3
   4  -9  15 1060.30 398.005   1
  -4   9 -15 988.390 424.714   3
   4  -9  16-32.7808 160.903   1
  -4   9 -16 379.503 267.342   3
   4  -9  17 1620.99 563.171   1
  -4   9 -17 1507.47 635.559   3
   4  -9  18 528.888 366.556   1
  -4   8  18-0.93918 231.258   1
  -4   8  17 2025.91 640.787   1
  -4   8  16 348.583 255.978   1
  -4   8  15 428.293 388.219   1
  -4   8  14 779.479 394.229   1
  -4   8  13 757.832 338.194   1
  -4   8  12 835.892 337.551   1
  -4   8  11 23828.7 1609.08   2
  -4   8  11 26313.0 1845.23   1
   4  -8 -10 177.756 222.242   2
   4  -8 -10 108.933 167.118   3
  -4   8  10 309.878 253.623   1
  -4   8  10-303.383 238.873   2
  -4   8   9 2782.48 569.125   3
   4  -8  -9 2928.11 594.800   3
  -4   8   9 3087.28 563.389   1
   4  -8  -9 2663.54 564.252   2
  -4   8   9 2147.60 423.542   2
  -4   8   8 34180.2 1777.01   1
   4  -8  -8 31424.3 1956.54   3
  -4   8   8 30248.8 1596.63   2
  -4   8   7 2290.08 504.204   3
   4  -8  -7 1864.35 463.317   3
  -4   8   7 1371.87 314.160   2
  -4   8   7 1595.80 389.010   1
  -4   8   6 12062.6 903.595   1
   4  -8  -6 11076.2 1131.42   3
  -4   8   6 10801.3 853.988   2
  -4   8   6 13338.4 1134.31   3
   4  -8  -6 11444.3 905.420   2
  -4   8   5 7960.35 862.111   3
  -4   8   5 7621.86 674.505   1
   4  -8  -5 7415.22 907.641   3
  -4   8   5 6789.50 616.992   2
   4  -8  -5 8033.57 702.913   2
  -4   8   4 2234.87 337.226   1
  -4   8   4 2240.80 446.737   3
   4  -8  -4 2482.73 496.309   3
  -4   8   4 2065.99 313.546   2
   4  -8  -4 2213.75 345.131   2
  -4   8   3 973.285 317.955   3
   4  -8  -3 626.482 249.737   3
  -4   8   3 601.444 146.560   2
  -4   8   3 374.146 82.4978   1
   4  -8  -3 627.297 171.180   2
  -4   8   2 3567.34 320.677   2
  -4   8   2 4061.06 632.424   3
  -4   8   2 3582.85 315.660   1
   4  -8  -2 4308.07 687.894   3
   4  -8  -2 3567.44 360.026   2
  -4   8   1 19991.6 714.119   2
  -4   8   1 21891.1 1467.37   3
   4  -8  -1 23009.1 1567.85   3
  -4   8   0 831.580 139.672   2
  -4   8   0 462.531 183.264   3
   4  -8   0 830.764 293.723   3
  -4   8  -1 1207.42 377.498   3
   4  -8   1 1004.65 332.054   3
  -4   8  -1 1144.91 155.975   2
  -4   8  -2 2365.76 493.449   3
   4  -8   2 2644.77 535.430   3
  -4   8  -2 1933.18 224.404   2
  -4   8  -3 6683.27 887.810   3
   4  -8   3 4348.64 303.658   1
   4  -8   3 6117.17 847.992   3
  -4   8  -3 7075.74 481.051   2
   4  -8   3 5662.52 320.141   1
  -4   8  -4 6053.47 864.742   3
  -4   8  -4 5046.80 415.537   2
   4  -8   4 6329.57 894.742   3
   4  -8   4 5909.76 421.740   1
   4  -8   5 1320.84 221.793   1
  -4   8  -5 794.714 160.960   2
  -4   8  -5 1242.48 404.685   3
  -4   8  -6 9526.98 1107.35   3
  -4   8  -6 9810.93 747.209   2
   4  -8   6 10147.3 738.007   1
   4  -8   7 1853.01 343.219   1
  -4   8  -7 1992.91 450.790   3
  -4   8  -7 1976.32 367.817   2
   4  -8   8-41.9240 151.029   1
  -4   8  -8 117.885 238.113   3
  -4   8  -8 121.606 128.086   2
   4  -8   9 300.180 168.226   1
  -4   8  -9 322.829 122.426   3
  -4   8  -9 469.946 221.943   2
   4  -8  10 1622.34 409.965   1
  -4   8 -10 2353.10 582.389   3
  -4   8 -10 2262.86 463.055   2
  -4   8 -11 6649.03 831.816   2
  -4   8 -11 6004.48 986.004   3
   4  -8  11 4980.00 753.854   1
  -4   8 -12 338.247 263.027   3
   4  -8  12 98.4466 140.601   1
   4  -8  13 1454.93 437.966   1
  -4   8 -13 1803.72 538.995   3
  -4   8 -14 6697.85 1150.50   3
   4  -8  14 4738.95 842.711   1
   4  -8  15 2122.98 589.418   1
  -4   8 -15 2024.75 672.315   3
   4  -8  16 683.850 396.330   1
  -4   8 -16 335.678 256.883   3
   4  -8  17-74.4972 176.236   1
  -4   8 -17-121.342 111.054   3
   4  -8  18 259.837 209.844   1
  -4   7  19 255.142 303.371   1
  -4   7  18-537.949 359.455   1
  -4   7  17 598.167 372.179   1
  -4   7  16 195.932 168.026   1
  -4   7  15 8.13676 177.121   1
  -4   7  14 588.095 311.766   1
  -4   7  14 696.370 301.188   2
  -4   7  13 8826.55 1072.10   2
  -4   7  13 10905.5 1271.57   1
   4  -7 -12 4673.44 807.730   3
  -4   7  12 3913.51 727.600   1
  -4   7  12 2955.36 593.049   2
   4  -7 -11 42522.3 2391.08   3
  -4   7  11 37850.1 2025.69   2
  -4   7  11 44848.5 2346.51   1
  -4   7  10 2649.38 545.312   1
   4  -7 -10 2182.68 515.645   2
  -4   7  10 1648.47 386.699   2
   4  -7 -10 2049.42 516.513   3
   4  -7  -9 134.933 148.357   2
   4  -7  -9 4.85557 147.776   3
  -4   7   9 68.5286 184.742   1
  -4   7   9 236.584 201.947   3
  -4   7   9-81.6584 193.247   2
  -4   7   8 1483.70 363.858   3
   4  -7  -8 861.119 323.320   3
  -4   7   8 874.823 289.808   1
  -4   7   8 906.649 294.108   2
  -4   7   7 2859.80 514.645   3
   4  -7  -7 1595.44 414.875   3
  -4   7   7 2105.74 404.544   1
  -4   7   7 1948.08 372.292   2
   4  -7  -6 1360.97 343.021   2
  -4   7   6 1964.57 416.688   3
   4  -7  -6 1420.75 384.438   3
  -4   7   6 1546.99 344.016   1
  -4   7   6 1208.89 299.799   2
  -4   7   5-171.448 192.219   3
   4  -7  -5-228.364 197.044   3
   4  -7  -5-67.5367 124.436   2
  -4   7   5 88.0318 108.196   2
  -4   7   5 47.4543 78.3812   1
  -4   7   4 77255.2 1793.42   1
  -4   7   4 80248.0 2608.69   3
   4  -7  -4 80188.3 2050.10   2
  -4   7   3 94911.0 2038.47   2
  -4   7   3 106330. 3099.88   3
   4  -7  -3 103142. 3113.77   3
  -4   7   3 96453.0 1767.81   1
   4  -7  -3 103749. 2193.21   2
  -4   7   2 2709.88 315.280   2
  -4   7   2 2880.04 490.370   3
   4  -7  -2 3688.28 599.691   3
   4  -7  -2 3009.26 341.599   2
  -4   7   2 2446.95 236.599   1
  -4   7   1 4923.86 653.363   3
   4  -7  -1 3900.33 611.723   3
  -4   7   1 3736.42 343.306   2
  -4   7   0 1205.75 181.363   2
   4  -7   0 1506.09 380.131   3
  -4   7   0 1599.37 404.037   3
  -4   7  -1 927.846 347.593   3
   4  -7   1 964.384 297.864   3
  -4   7  -1 905.800 159.913   2
  -4   7  -2 7670.13 891.203   3
   4  -7   2 7292.37 874.017   3
  -4   7  -2 7822.39 531.875   2
   4  -7   3 3154.16 231.925   1
   4  -7   3 4197.85 683.209   3
   4  -7   4 3607.00 327.511   1
  -4   7  -5 11219.2 1156.03   3
   4  -7   5 11015.4 667.133   1
  -4   7  -6 4333.85 726.510   3
  -4   7  -6 3501.63 446.134   2
   4  -7   6 3944.87 448.699   1
   4  -7   7 2026.62 362.265   1
  -4   7  -7 2079.32 526.134   3
  -4   7  -7 2154.26 399.090   2
  -4   7  -8 5935.03 900.568   3
  -4   7  -8 5720.00 686.949   2
   4  -7   8 5785.77 655.543   1
   4  -7   9 133.454 118.599   1
  -4   7  -9 23.6713 138.828   3
  -4   7  -9 45.7866 116.995   2
  -4   7 -10 15772.4 1267.30   2
  -4   7 -10 18167.4 1646.63   3
   4  -7  10 13150.6 1147.79   1
  -4   7 -11 790.518 316.658   3
   4  -7  11 261.454 170.573   1
   4  -7  12-19.5950 96.8645   1
  -4   7 -12-153.576 310.470   3
   4  -7  13 221.804 232.669   1
  -4   7 -13-22.1798 149.842   3
   4  -7  14 3843.69 784.233   1
  -4   7 -14 5704.66 1038.60   3
  -4   7 -15 8728.68 1307.83   3
   4  -7  15 5346.98 961.425   1
   4  -7  16-10.1316 100.495   1
  -4   7 -16 164.766 143.746   3
   4  -7  17 523.221 353.040   1
  -4   7 -17 532.053 351.534   3
   4  -7  18 493.855 397.052   1
   4  -7  19 995.071 388.274   1
  -4   6  19 1299.01 574.603   1
  -4   6  18 755.764 443.049   1
  -4   6  17 934.367 448.004   1
  -4   6  16 2522.77 692.310   1
  -4   6  15 242.577 206.195   1
  -4   6  15-27.3505 268.021   2
   4  -6 -14-58.8365 167.681   3
  -4   6  14-119.494 144.035   1
  -4   6  14-83.9683 108.377   2
   4  -6 -13 201.911 178.944   3
  -4   6  13-126.030 207.057   1
  -4   6  13 379.930 278.596   2
   4  -6 -12 2435.68 567.849   3
  -4   6  12 2510.49 552.621   1
  -4   6  12 2305.79 522.938   2
   4  -6 -11 12527.9 1223.34   3
  -4   6  11 12396.2 1179.66   2
  -4   6  11 13961.1 1296.17   1
   4  -6 -10 9659.13 1030.02   3
  -4   6  10 8954.93 957.324   2
  -4   6  10 10637.4 1054.64   1
   4  -6 -10 8691.26 1022.86   2
  -4   6   9 7914.30 879.067   2
   4  -6  -9 7455.08 863.540   3
  -4   6   9 8681.46 906.382   1
   4  -6  -9 7014.78 875.351   2
  -4   6   8 13136.2 1051.34   2
  -4   6   8 16400.3 1187.02   3
   4  -6  -8 12887.6 1099.72   3
  -4   6   8 13492.8 1037.76   1
  -4   6   7 20.3576 114.502   3
  -4   6   7-14.4619 89.4852   1
  -4   6   7-37.8195 89.8243   2
   4  -6  -6 1271.55 315.500   2
  -4   6   6 1325.07 303.990   3
   4  -6  -6 1152.14 329.528   3
  -4   6   6 1268.70 292.513   2
  -4   6   6 1393.25 321.697   1
   4  -6  -5 127.737 131.678   2
  -4   6   5 132.704 142.375   3
  -4   6   5 142.619 126.035   1
   4  -6  -5-15.9214 154.506   3
  -4   6   5 241.297 195.978   2
  -4   6   4 17219.0 1168.99   3
  -4   6   4 16588.4 953.487   2
   4  -6  -4 18358.6 1227.57   3
   4  -6  -4 18070.3 1001.79   2
  -4   6   4 18120.4 859.682   1
  -4   6   3 1650.09 217.181   1
  -4   6   3 1072.19 163.520   2
  -4   6   3 1502.45 324.736   3
   4  -6  -3 2054.14 400.870   3
   4  -6  -3 1877.26 310.046   2
  -4   6   2-179.763 182.736   2
  -4   6   2 23.2478 28.6547   1
  -4   6   2-37.2442 132.126   3
   4  -6  -2-173.389 156.409   3
   4  -6  -2 65.4613 52.4887   2
  -4   6   1-9.82607 57.2014   2
  -4   6   1-12.4465 160.411   3
   4  -6  -1-10.1745 67.5381   3
  -4   6   0 60880.2 2286.41   3
   4  -6   0 58925.4 2310.52   3
  -4   6   0 55988.3 1405.72   2
  -4   6  -1 6181.87 736.279   3
   4  -6   1 5768.92 730.145   3
  -4   6  -1 5991.13 491.322   2
  -4   6  -2 5628.36 733.144   3
  -4   6  -2 6220.90 531.355   2
   4  -6   3 5216.89 323.936   1
   4  -6   4 906.353 171.025   1
   4  -6   5 21352.7 957.994   1
  -4   6  -6 2968.41 553.360   3
   4  -6   6 2984.52 407.891   1
   4  -6   7 146.585 114.116   1
  -4   6  -7 108.181 155.326   3
  -4   6  -7 60.0867 129.002   2
  -4   6  -8 4608.25 748.116   3
  -4   6  -8 4630.68 614.606   2
   4  -6   8 5234.10 655.104   1
   4  -6   9 1227.97 358.593   1
  -4   6  -9 1431.41 443.329   3
  -4   6  -9 658.636 274.441   2
  -4   6 -10 15455.5 1287.54   2
  -4   6 -10 14626.9 1469.25   3
   4  -6  10 15870.1 1286.44   1
  -4   6 -11 4775.69 831.749   3
   4  -6  11 4111.68 724.912   1
   4  -6  12 931.672 349.137   1
  -4   6 -12 1501.40 429.358   3
   4  -6  13 383.705 233.679   1
  -4   6 -13 565.340 189.629   3
   4  -6  14 2605.21 640.773   1
  -4   6 -14 3712.53 825.835   3
  -4   6 -15 8714.71 1308.44   3
   4  -6  15 7256.00 1110.55   1
   4  -6  16 233.163 158.363   1
  -4   6 -16 627.839 358.874   3
   4  -6  17 552.774 296.155   1
  -4   6 -17 236.452 174.401   3
   4  -6  18 904.058 350.697   1
   4  -6  19 504.961 385.433   1
  -4   5  19 2637.34 760.688   1
  -4   5  18 152.341 122.845   1
  -4   5  17 527.276 344.676   1
  -4   5  17 31.5356 287.568   2
  -4   5  16 950.903 433.677   1
  -4   5  16-36.0277 177.667   2
  -4   5  15-78.9744 145.918   1
  -4   5  15-90.3787 161.067   2
   4  -5 -14 5341.10 808.836   3
  -4   5  14 3321.40 647.802   2
  -4   5  14 4966.21 882.801   1
   4  -5 -13 4361.09 704.565   3
  -4   5  13 3623.36 697.301   2
  -4   5  13 4723.68 862.840   1
  -4   5  12 2226.75 551.325   1
   4  -5 -12 2230.73 490.232   3
  -4   5  12 1999.94 518.246   2
   4  -5 -11 3365.49 595.872   3
  -4   5  11 3234.27 627.054   1
  -4   5  11 3287.46 597.049   2
  -4   5  10 2086.17 495.402   1
   4  -5 -10 1061.42 375.270   2
  -4   5  10 1459.09 385.350   2
   4  -5 -10 1315.49 358.405   3
   4  -5  -9 7662.22 806.093   3
  -4   5   9 6840.75 806.392   2
  -4   5   9 8543.52 901.388   1
   4  -5  -9 8121.15 921.211   2
  -4   5   8 8700.81 817.097   3
  -4   5   8 5840.11 653.732   2
   4  -5  -8 6360.00 717.510   3
  -4   5   8 7440.15 812.734   1
   4  -5  -8 6027.75 764.761   2
  -4   5   7 18922.7 1167.53   3
  -4   5   7 15540.5 1062.90   2
   4  -5  -7 18787.4 1186.64   3
  -4   5   7 17787.6 1149.99   1
   4  -5  -6 2317.60 397.014   2
  -4   5   6 3517.74 485.193   3
   4  -5  -6 3603.76 498.186   3
  -4   5   6 3134.12 473.565   2
  -4   5   6 3201.71 460.714   1
  -4   5   5 4154.66 509.319   2
  -4   5   5 3622.01 509.125   3
   4  -5  -5 4454.34 564.171   3
   4  -5  -5 4270.87 531.441   2
  -4   5   5 3754.73 445.083   1
  -4   5   4 5589.00 554.644   2
  -4   5   4 7574.49 726.163   3
   4  -5  -4 7551.22 718.732   3
   4  -5  -4 7250.48 646.290   2
  -4   5   4 7050.82 531.026   1
  -4   5   3 8689.15 764.239   3
   4  -5  -3 9048.84 793.371   3
   4  -5  -3 8974.71 688.923   2
  -4   5   3 8364.79 487.999   1
  -4   5   3 7014.28 581.079   2
  -4   5   2 3407.29 499.402   3
   4  -5  -2 4267.39 573.928   3
   4  -5  -2 3832.47 451.622   2
  -4   5   2 3154.17 372.485   2
  -4   5   2 3078.83 221.982   1
  -4   5   1 7762.22 762.041   3
   4  -5  -1 7597.33 777.123   3
  -4   5   1 6840.24 554.695   2
  -4   5   0 22925.7 1337.55   3
   4  -5   0 22191.6 1364.09   3
  -4   5   0 22252.7 990.747   2
  -4   5  -1 15602.5 1159.60   3
  -4   5  -1 15808.5 881.256   2
  -4   5  -2 1404.61 354.262   3
   4  -5   3 9698.04 520.769   1
   4  -5   4 786.736 165.844   1
   4  -5   5 29771.7 1181.29   1
  -4   5  -6 20304.4 1508.52   3
   4  -5   6 22286.1 1134.70   1
   4  -5   7 253.307 141.868   1
  -4   5  -7 232.659 105.095   3
   4  -5   8 1593.48 358.810   1
  -4   5  -8 1720.71 506.643   3
  -4   5  -8 1203.32 318.342   2
  -4   5  -9 6557.01 964.679   3
  -4   5  -9 4727.20 682.029   2
   4  -5   9 7199.02 813.203   1
  -4   5 -10 8277.03 1091.99   3
   4  -5  10 8887.41 977.300   1
   4  -5  11-156.466 223.155   1
  -4   5 -11-73.8344 252.643   3
  -4   5 -12 9815.13 1270.22   3
   4  -5  12 8057.10 1026.79   1
   4  -5  13-17.5760 104.408   1
  -4   5 -13 392.009 368.038   3
   4  -5  14-94.2999 255.107   1
  -4   5 -14 64.0302 228.595   3
   4  -5  15 569.687 320.459   1
  -4   5 -15 1892.07 619.000   3
   4  -5  16 685.204 388.932   1
  -4   5 -16 1036.21 459.653   3
  -4   5 -17 296.027 279.842   3
   4  -5  17 168.938 148.929   1
   4  -5  18 1398.45 558.116   1
   4  -5  19-212.751 289.495   1
  -4   4  19 116.423 175.490   1
  -4   4  18 1048.56 489.188   1
  -4   4  18 686.192 352.735   2
  -4   4  17-43.9995 174.703   1
  -4   4  17 509.004 241.835   2
  -4   4  16 115.692 212.892   1
  -4   4  16-82.8377 282.105   2
   4  -4 -15 4397.85 713.217   3
  -4   4  15 3704.13 825.184   1
  -4   4  15 1906.15 575.704   2
  -4   4  14 23928.6 1882.81   2
  -4   4  14 27472.6 2051.93   1
  -4   4  13 3203.06 697.296   1
   4  -4 -13 3168.62 571.043   3
  -4   4  13 2454.15 573.392   2
  -4   4  12 2241.71 556.933   1
   4  -4 -12 2261.87 474.406   3
  -4   4  12 2088.99 528.954   2
  -4   4  11 440.524 240.137   1
   4  -4 -11 299.478 164.632   3
  -4   4  11 78.3006 136.658   2
  -4   4  10 924.271 375.833   1
   4  -4 -10 694.997 313.470   2
   4  -4 -10 771.989 253.028   3
  -4   4  10 561.564 269.300   2
  -4   4   9 9202.04 891.960   2
   4  -4  -9 10361.3 864.853   3
  -4   4   9 12836.9 1100.76   1
   4  -4  -9 13427.8 1171.21   2
   4  -4  -8 196.913 136.476   2
  -4   4   8 329.633 199.052   3
   4  -4  -8 207.270 114.604   3
  -4   4   8 110.578 131.312   2
  -4   4   8 433.326 258.215   1
  -4   4   7 131.094 112.728   3
  -4   4   7 111.054 112.409   2
   4  -4  -7 238.567 165.682   3
  -4   4   6 10273.7 890.775   2
  -4   4   6 11945.8 825.654   3
   4  -4  -6 12418.3 871.361   3
  -4   4   5 2310.44 408.776   2
   4  -4  -5 2001.70 345.679   3
  -4   4   5 2469.66 388.549   3
   4  -4  -5 1949.24 376.118   2
  -4   4   4 15697.5 934.923   3
   4  -4  -4 17382.6 1022.10   3
   4  -4  -4 15929.5 1010.19   2
  -4   4   4 14650.1 934.789   2
  -4   4   3 3312.13 445.065   3
   4  -4  -3 3632.56 493.130   3
   4  -4  -3 3039.48 426.460   2
  -4   4   3 2405.00 349.202   2
  -4   4   2 198860. 3555.62   3
   4  -4  -2 199215. 3648.15   3
   4  -4  -2 199298. 3260.73   2
  -4   4   1 2252.57 374.057   3
   4  -4  -1 2870.39 439.051   3
  -4   4   1 1639.05 156.337   1
  -4   4   1 2363.29 329.772   2
  -4   4   0 196.470 129.440   3
  -4   4   0 297.441 140.452   2
  -4   4  -1 13802.2 1035.02   3
  -4   4  -1 13779.5 899.014   2
  -4   4  -1 12971.6 446.456   1
   4  -4   2 63852.3 1320.23   1
  -4   4  -2 59905.1 2250.05   3
  -4   4  -3 7095.63 798.582   3
   4  -4   3 8212.62 552.447   1
   4  -4   4 14227.2 790.810   1
   4  -4   5 27010.7 1169.12   1
   4  -4   6 208.832 125.127   1
  -4   4  -7 2669.33 528.714   3
   4  -4   7 2491.52 453.429   1
   4  -4   8 10819.2 953.796   1
   4  -4   9 427.616 241.378   1
  -4   4  -9 104.600 139.042   2
   4  -4  10 3053.00 574.244   1
   4  -4  11 13043.1 1279.59   1
   4  -4  12 8227.96 1080.55   1
   4  -4  13 395.813 259.281   1
   4  -4  14 979.644 401.795   1
   4  -4  15 6038.57 1029.24   1
  -4   4 -16 447.004 422.076   3
   4  -4  16 40.0883 186.280   1
  -4   4 -17 2641.17 800.380   3
   4  -4  17 2650.80 756.271   1
   4  -4  18 43.0696 240.852   1
  -4   3  20 19.9769 184.437   1
  -4   3  19 5.73433 148.911   1
  -4   3  19-141.909 287.293   2
  -4   3  18 329.699 261.608   1
  -4   3  18-353.305 282.346   2
  -4   3  17 10692.5 1351.30   2
  -4   3  17 12875.0 1601.03   1
  -4   3  16 588.170 405.113   1
  -4   3  16-23.4002 192.912   2
  -4   3  15 2968.06 739.413   1
   4  -3 -15 3959.20 634.736   3
  -4   3  15 3064.21 701.818   2
  -4   3  14 2125.51 582.556   1
   4  -3 -14 1817.82 414.353   3
  -4   3  14 1719.65 489.287   2
  -4   3  13 5401.22 858.823   2
   4  -3 -13 4725.53 631.325   3
  -4   3  13 5906.84 919.379   1
   4  -3 -12 1087.33 292.392   3
  -4   3  12 941.952 292.809   2
  -4   3  12 1324.41 398.913   1
   4  -3 -11 6625.85 694.958   3
  -4   3  11 5984.57 823.493   2
   4  -3 -10 2041.54 480.902   2
   4  -3 -10 1693.05 322.397   3
  -4   3  10 1362.08 373.007   2
   4  -3  -9 71.4991 81.0196   3
   4  -3  -9 28.2551 166.246   2
  -4   3   9 361.781 220.346   2
  -4   3   8 5926.91 741.101   2
   4  -3  -8 4772.54 501.431   3
  -4   3   8 7503.96 643.174   3
   4  -3  -8 6461.14 767.615   2
  -4   3   7 4411.90 628.098   2
   4  -3  -7 5244.71 519.786   3
  -4   3   7 5213.90 505.839   3
  -4   3   6 2333.79 353.269   3
  -4   3   6 1931.46 399.419   2
   4  -3  -6 2434.85 337.393   3
  -4   3   5 32056.2 1237.73   3
   4  -3  -5 31860.7 1253.06   3
   4  -3  -5 29335.0 1422.27   2
  -4   3   5 29475.4 1413.09   2
  -4   3   4 28368.0 1166.93   3
   4  -3  -4 29123.4 1233.48   3
   4  -3  -4 28685.8 1353.64   2
  -4   3   4 25455.5 1229.06   2
  -4   3   3 47468.9 1576.60   3
   4  -3  -3 47540.2 1636.41   3
   4  -3  -3 46237.8 1724.99   2
  -4   3   2 21434.2 1117.72   3
   4  -3  -2 21867.9 1139.48   2
  -4   3   2 19331.3 1014.02   2
  -4   3   1 10542.1 516.325   1
  -4   3   1 11329.2 844.641   3
  -4   3   1 9965.67 756.870   2
  -4   3   0 77882.6 1359.78   1
  -4   3   0 79776.6 2335.69   3
  -4   3   0 82759.6 2253.14   2
  -4   3  -1 12593.2 953.470   3
  -4   3  -1 12934.9 915.119   2
  -4   3  -1 12618.4 578.430   1
   4  -3   2 17849.6 822.783   1
  -4   3  -2 16886.4 739.152   1
  -4   3  -3 1599.42 336.512   3
   4  -3   3 2202.23 322.037   1
  -4   3  -3 2366.59 314.762   1
   4  -3   4 134.340 98.2306   1
  -4   3  -4 475.761 168.370   1
   4  -3   5 6365.23 639.375   1
   4  -3   6 3294.14 468.772   1
   4  -3   7 20456.3 1254.25   1
   4  -3   8 19624.6 1317.83   1
   4  -3   9 24574.3 1569.37   1
   4  -3  10 8395.25 981.157   1
   4  -3  11 14924.7 1382.78   1
   4  -3  12-169.797 127.574   1
   4  -3  13 2418.83 638.598   1
   4  -3  14-11.7332 115.029   1
   4  -3  15 4584.21 924.141   1
   4  -3  16 2615.47 718.644   1
   4  -3  17 4763.22 987.443   1
   4  -3  18 1884.65 660.451   1
  -4   2  20 309.219 283.870   1
  -4   2  20-57.0138 214.829   2
  -4   2  19 67.0845 244.799   1
  -4   2  19-324.936 302.406   2
  -4   2  18 1192.66 549.814   1
  -4   2  18 59.0702 189.394   2
  -4   2  17 3704.08 834.113   1
  -4   2  17 2821.38 690.836   2
  -4   2  16 3681.87 817.697   1
  -4   2  16 2846.07 700.569   2
   4  -2 -15 3345.53 531.993   3
  -4   2  15 2729.13 663.812   2
  -4   2  15 3303.65 753.013   1
   4  -2 -14 129.888 150.351   3
  -4   2  14 163.756 247.872   2
  -4   2  14-329.200 249.310   1
   4  -2 -13 1553.90 320.604   3
  -4   2  13 1405.69 409.003   2
   4  -2 -12 8779.50 741.256   3
  -4   2  12 8223.00 992.013   2
   4  -2 -11 4247.14 478.666   3
  -4   2  11 4552.03 708.117   2
   4  -2 -10 2570.40 555.218   2
   4  -2 -10 2153.95 320.532   3
  -4   2  10 1879.74 475.155   2
   4  -2  -9 2488.59 492.172   2
  -4   2   9 2780.95 556.279   2
   4  -2  -9 2028.76 285.496   3
  -4   2   8 9943.84 977.296   2
   4  -2  -8 10227.3 620.655   3
   4  -2  -8 9765.03 949.777   2
  -4   2   7 5893.03 719.743   2
  -4   2   7 6104.98 477.753   3
   4  -2  -7 5948.06 461.453   3
  -4   2   6 4607.76 400.645   3
   4  -2  -6 5515.83 451.617   3
  -4   2   6 4881.67 624.842   2
  -4   2   5 4595.32 448.317   3
   4  -2  -5 4371.82 451.232   3
  -4   2   5 4716.68 559.352   2
  -4   2   4 89.8907 108.749   2
  -4   2   4 25.4936 92.4973   3
   4  -2  -4 206.386 163.335   2
  -4   2   3 85035.5 2029.21   3
   4  -2  -3 81340.3 2314.52   2
  -4   2   2 7760.02 648.148   3
   4  -2  -2 6959.07 674.697   2
  -4   2   2 6245.01 637.643   2
  -4   2   1 8401.17 566.241   1
  -4   2   1 8870.11 762.832   3
  -4   2   1 7261.62 722.049   2
  -4   2   0 17132.2 1089.28   3
  -4   2   0 18020.0 834.972   1
  -4   2   0 17193.1 1084.74   2
  -4   2  -1 1075.56 383.230   3
  -4   2  -1 1069.28 245.436   1
   4  -2   2 31110.1 1229.02   1
  -4   2  -2 32987.8 1201.89   1
   4  -2   3 1177.76 346.178   1
  -4   2  -3 916.737 211.912   1
  -4   2  -4 127.843 96.5680   1
   4  -2   4 169.281 230.878   1
   4  -2   5 28112.2 1389.71   1
  -4   2  -5 26656.7 1364.89   1
   4  -2   6 11647.7 939.880   1
  -4   2  -6 12919.3 1030.59   1
   4  -2   7 3361.74 541.579   1
   4  -2   8 7327.21 818.652   1
   4  -2   9 200.878 120.605   1
   4  -2  10 283.621 130.169   1
   4  -2  11 497.058 194.412   1
   4  -2  12 893.752 353.673   1
   4  -2  13 49.6290 213.162   1
   4  -2  14 2971.85 721.594   1
   4  -2  15 2744.53 734.215   1
   4  -2  16 659.840 461.920   1
   4  -2  17 902.202 468.220   1
   4  -2  18 108.237 147.482   1
  -4   1  20 4370.35 951.532   2
  -4   1  20 6204.58 1231.09   1
  -4   1  19 1139.49 584.428   1
  -4   1  19-130.939 266.694   2
  -4   1  18 207.491 235.626   1
  -4   1  18 39.2987 203.213   2
  -4   1  17 4717.58 925.996   2
  -4   1  17 5766.95 1072.23   1
  -4   1  16 921.352 361.233   2
  -4   1  16 1146.76 520.971   1
   4  -1 -15 18394.3 1123.03   3
  -4   1  15 13498.2 1455.17   2
   4  -1 -14 1174.88 264.248   3
  -4   1  14 912.809 349.994   2
   4  -1 -13 1105.73 246.926   3
  -4   1  13 1648.74 479.195   2
   4  -1 -12 7831.44 604.747   3
  -4   1  12 7289.87 908.569   2
   4  -1 -11 5333.26 440.437   3
  -4   1  11 5711.27 809.290   2
   4  -1 -10 198.546 184.468   2
   4  -1 -10 52.6913 46.5689   3
  -4   1  10 94.7861 175.802   2
   4  -1  -9 10779.2 528.507   3
  -4   1   9 13412.2 1190.27   2
   4  -1  -9 13290.9 1152.59   2
  -4   1   8 4166.40 647.066   2
   4  -1  -8 4238.20 318.403   3
  -4   1   7 1194.03 185.685   3
  -4   1   7 1127.23 324.646   2
   4  -1  -7 849.035 153.738   3
  -4   1   6 2235.80 252.948   3
  -4   1   6 3940.53 561.794   2
  -4   1   5 44047.2 1128.03   3
  -4   1   5 45175.8 1895.47   2
  -4   1   4 2658.37 304.117   3
  -4   1   4 2751.27 475.709   2
  -4   1   3 29861.2 1160.52   3
  -4   1   3 25644.4 1373.83   2
  -4   1   2 2099.78 328.007   3
  -4   1   2 1476.04 262.345   1
  -4   1   2 1526.23 346.196   2
  -4   1   1 29633.3 1310.02   3
  -4   1   1 27691.3 1442.60   2
  -4   1   0 25920.0 1461.61   2
  -4   1   0 28618.5 1201.17   1
  -4   1  -1 63488.3 1815.96   1
   4  -1   1 55638.4 1752.84   1
  -4   1  -2 19379.5 1034.25   1
   4  -1   2 19119.9 1069.48   1
   4  -1   3 29166.8 1432.34   1
  -4   1  -3 26126.5 1252.16   1
   4  -1   4 18912.5 1212.05   1
  -4   1  -4 16453.8 1050.94   1
   4  -1   5 69081.2 2371.12   1
  -4   1  -5 57621.5 2106.55   1
   4  -1   6 24880.4 1473.11   1
  -4   1  -6 25151.4 1488.90   1
   4  -1   7 5715.50 753.030   1
  -4   1  -7 6074.03 784.565   1
   4  -1   8 14616.0 1219.87   1
  -4   1  -8 17933.0 1438.91   1
   4  -1   9 12135.3 1151.49   1
   4  -1  10 4234.13 720.400   1
   4  -1  11 633.104 292.888   1
   4  -1  12 2723.41 651.035   1
   4  -1  13 2942.04 704.795   1
   4  -1  14 8960.57 1240.00   1
   4  -1  15 380.421 255.878   1
   4  -1  16 3913.41 875.158   1
   4  -1  17 576.140 369.908   1
  -4   0  20 2948.80 816.788   1
  -4   0  20 2638.61 756.248   2
  -4   0  19 321.950 242.718   1
  -4   0  19 596.577 398.378   2
  -4   0  18 307.387 312.613   2
  -4   0  18 125.804 302.221   1
  -4   0  17 262.229 319.541   2
  -4   0  16 514.803 358.379   2
   4   0 -15 145.441 87.6828   3
  -4   0  15 158.372 166.232   2
   4   0 -14 251.052 117.082   3
  -4   0  14 698.423 394.007   2
   4   0 -13 2488.44 308.245   3
  -4   0  13 3002.25 632.352   2
   4   0 -12 3285.35 300.021   3
  -4   0  12 3448.66 646.550   2
   4   0 -11 1351.52 165.337   3
  -4   0  11 1554.96 463.521   2
  -4   0  10 4419.42 715.672   2
   4   0 -10 5240.31 771.275   2
  -4   0   9 2047.84 479.014   2
  -4   0   8 460.043 178.370   2
  -4   0   7 2130.31 427.396   2
  -4   0   6 33569.5 697.401   3
  -4   0   6 53018.2 2094.45   2
  -4   0   5 19867.7 670.195   3
  -4   0   5 24551.8 1340.25   2
  -4   0   4 1510.39 449.509   2
  -4   0   4 1224.21 240.663   3
  -4   0   3 86908.8 1848.18   3
  -4   0   3 78554.2 2536.57   2
  -4   0   2 1963.52 344.374   1
  -4   0   2 1811.66 372.175   2
  -4   0   1 26134.1 1233.66   1
  -4   0   1 28908.3 1589.69   2
  -4   0   0 460.627 272.887   2
  -4   0   0 76.5622 121.567   1
  -4   0  -1 48670.7 1751.78   1
   4   0   1 41094.6 1620.51   1
  -4   0  -2 12884.9 911.485   1
   4   0   2 13789.6 999.686   1
   4   0   3 39056.3 1708.33   1
  -4   0  -3 34028.4 1543.70   1
   4   0   4 10185.4 954.417   1
  -4   0  -4 8038.62 776.820   1
   4   0   5 6210.10 759.099   1
  -4   0  -5 6157.79 726.565   1
   4   0   6 13156.3 1142.87   1
  -4   0  -6 13201.4 1121.48   1
  -4   0  -7 2685.28 537.546   1
   4   0   7 2655.67 526.602   1
   4   0   8 7768.07 929.456   1
  -4   0  -8 6458.46 868.001   1
   4   0   9 9555.91 1069.31   1
   4   0  10 15755.7 1427.01   1
   4   0  11 2983.77 648.228   1
   4   0  12 6501.79 1012.51   1
   4   0  13 309.092 259.207   1
   4   0  14 1808.75 587.643   1
   4   0  15 506.135 314.834   1
   4   0  16 4433.07 960.870   1
   4   0  17 968.823 458.492   1
  -4  -1  20 716.814 554.894   1
  -4  -1  20 369.880 301.840   2
  -4  -1  19 47.9520 253.288   2
  -4  -1  19 852.481 560.968   1
  -4  -1  18 956.359 481.768   2
  -4  -1  17-119.002 212.366   2
  -4  -1  16-235.366 193.226   2
  -4  -1  15-167.036 140.112   2
   4   1 -15 137.021 76.8280   3
   4   1 -14 28921.5 905.605   3
  -4  -1  14 31270.1 2039.36   2
   4   1 -13 12715.2 461.360   3
   4   1 -13 14744.8 481.451   3
  -4  -1  12 1209.48 416.416   2
  -4  -1  11 973.188 344.950   2
   4   1 -10 84.7123 99.3857   2
  -4  -1  10-57.6426 174.820   2
  -4  -1   9 1848.40 477.613   2
  -4  -1   8 4559.40 680.226   2
  -4  -1   7 1758.05 404.519   2
  -4  -1   6 22561.0 1394.00   2
  -4  -1   5 40195.4 914.051   3
  -4  -1   5 45029.3 1884.64   2
  -4  -1   4 161293. 2272.82   3
  -4  -1   4 167429. 3613.09   2
  -4  -1   3 1282.38 360.213   2
  -4  -1   2 3411.43 494.420   1
  -4  -1   2 2859.09 477.274   2
  -4  -1   1 764.417 259.466   1
  -4  -1   1 786.336 254.985   2
  -4  -1   0 1330.28 404.535   2
  -4  -1   0 1540.89 365.114   1
  -4  -1  -1 3899.01 556.236   1
   4   1   1 4382.85 562.276   1
  -4  -1  -2 35646.4 1643.39   1
   4   1   2 38099.8 1724.61   1
   4   1   3 2272.69 445.906   1
  -4  -1  -3 2005.01 404.615   1
   4   1   4 2902.84 534.953   1
  -4  -1  -4 2481.76 460.350   1
  -4  -1  -5 607.118 252.019   1
   4   1   5 276.667 191.743   1
  -4  -1  -6 3743.97 581.484   1
   4   1   6 4156.75 663.972   1
   4   1   7 9714.94 1059.19   1
  -4  -1  -7 11266.5 1140.82   1
  -4  -1  -8 658.877 294.868   1
   4   1   8 699.965 312.255   1
   4   1   9 17910.4 1533.67   1
   4   1  10 621.605 270.140   1
   4   1  11 2693.85 652.703   1
   4   1  12 164.578 149.117   1
   4   1  13 1016.22 443.028   1
   4   1  14 1010.88 426.837   1
   4   1  15-249.917 260.766   1
   4   1  16 406.915 346.900   1
   4   1  17 556.907 474.858   1
  -4  -2  20 99.3821 195.128   2
  -4  -2  20 927.858 386.400   1
  -4  -2  19 3738.41 954.020   2
  -4  -2  18 148.379 250.366   2
  -4  -2  17 578.972 373.702   2
  -4  -2  16 6574.54 1074.93   2
   4   2 -15-43.2134 43.0628   3
  -4  -2  15 102.661 118.737   2
  -4  -2  14 34309.5 2189.02   2
  -4  -2  13 625.368 375.851   2
  -4  -2  12 281.792 282.868   2
  -4  -2  11 8491.86 1051.51   2
  -4  -2  10 1044.18 354.812   2
  -4  -2   9 29175.9 1811.55   2
  -4  -2   8 6359.74 810.825   2
  -4  -2   7-102.763 193.699   2
  -4  -2   6 75459.1 2615.55   2
  -4  -2   5 26962.0 818.772   3
  -4  -2   5 40731.7 1918.21   2
  -4  -2   4 571.396 300.257   2
  -4  -2   3 4752.18 622.854   1
  -4  -2   3 3983.19 596.719   2
  -4  -2   2 2150.05 390.875   1
  -4  -2   2 1636.61 378.884   2
  -4  -2   1 452.645 173.605   1
  -4  -2   1 22.5464 119.800   2
  -4  -2   0 19396.1 1404.99   2
  -4  -2   0 22566.7 1407.87   1
  -4  -2  -1 24023.3 1464.05   1
   4   2   1 24119.6 1413.54   1
  -4  -2  -2 62299.4 2320.45   1
   4   2   2 65612.3 2373.41   1
  -4  -2  -3 33461.6 1742.80   1
   4   2   3 44668.1 2042.69   1
   4   2   4 3426.66 619.193   1
  -4  -2  -4 3290.05 558.451   1
  -4  -2  -5 3765.73 619.125   1
   4   2   5 4644.35 744.647   1
   4   2   6 6689.75 900.044   1
  -4  -2  -6 7517.89 926.213   1
  -4  -2  -7 1780.10 492.857   1
   4   2   7 1087.27 438.560   1
   4   2   8 8285.37 1050.81   1
   4   2   9 6791.86 988.663   1
   4   2  10 926.372 374.858   1
   4   2  11 356.267 221.858   1
   4   2  12 20.4490 298.308   1
   4   2  13 999.079 370.958   1
   4   2  14 286.531 225.425   1
   4   2  15 1897.51 632.185   1
   4   2  16 222.694 326.409   1
  -4  -3  20 142.825 185.188   2
  -4  -3  19 2523.31 747.640   2
  -4  -3  18 539.611 304.499   2
  -4  -3  17 158.707 152.548   2
  -4  -3  16 3147.85 724.490   2
  -4  -3  15 1811.57 482.708   2
  -4  -3  14 1160.13 485.877   2
  -4  -3  13 1149.94 380.763   2
  -4  -3  12 5839.66 915.156   2
  -4  -3  11 2367.62 562.383   2
  -4  -3  10 2641.59 548.074   2
   4   3  -9 27222.3 1746.77   2
  -4  -3   9 26786.9 1780.97   2
  -4  -3   8 835.631 278.689   2
   4   3  -8 1167.84 327.050   2
  -4  -3   7 238.426 122.401   2
  -4  -3   6 4468.08 283.974   3
  -4  -3   6 6032.90 790.818   2
  -4  -3   5 30946.3 987.094   3
  -4  -3   5 33715.4 1819.02   2
  -4  -3   4 102865. 2107.43   3
  -4  -3   4 101338. 3039.68   2
  -4  -3   3 7507.46 871.772   2
  -4  -3   3 7232.17 848.810   1
  -4  -3   2 46033.0 2043.88   1
  -4  -3   2 43568.4 2130.75   2
  -4  -3   1 3753.51 613.655   1
  -4  -3   1 3252.86 576.355   2
  -4  -3   0 42107.3 2190.70   2
  -4  -3   0 46859.3 2205.03   1
  -4  -3  -1 31060.8 1780.76   1
   4   3   1 31967.9 1725.71   1
  -4  -3  -2 2761.56 534.203   1
   4   3   2 3075.54 565.217   1
   4   3   3 361.951 218.987   1
  -4  -3  -3 448.441 248.690   1
   4   3   4 17974.4 1399.16   1
  -4  -3  -4 15038.9 1265.79   1
   4   3   5 2101.97 500.725   1
  -4  -3  -5 1724.98 430.183   1
   4   3   6 889.910 240.720   1
  -4  -3  -6 2013.89 510.195   1
   4   3   7 16378.1 1475.76   1
   4   3   8 18964.7 1638.84   1
   4   3   9 2550.44 643.522   1
   4   3  10 229.922 122.516   1
   4   3  11 92.6636 176.716   1
   4   3  12-147.664 292.367   1
   4   3  13 679.427 355.967   1
   4   3  14 219.007 203.055   1
   4   3  15 1301.62 558.861   1
   4   3  16 1622.43 668.819   1
  -4  -4  20-19.7307 229.554   2
  -4  -4  19 645.896 388.578   2
  -4  -4  18 366.082 228.017   2
  -4  -4  17 303.791 324.281   2
  -4  -4  16-359.471 181.891   2
  -4  -4  15 7550.21 1097.74   2
  -4  -4  14 13942.4 1506.45   2
  -4  -4  13 2596.34 615.519   2
  -4  -4  12 15184.5 1491.86   2
  -4  -4  11 812.480 286.367   2
  -4  -4  10 3603.39 686.317   2
  -4  -4   9 313.072 182.849   2
   4   4  -8 18804.5 1429.36   2
  -4  -4   8 19861.8 1505.26   2
   4   4  -7 11500.1 1123.72   2
  -4  -4   7 11733.4 1122.70   2
  -4  -4   6 40446.6 1054.67   3
  -4  -4   6 47783.4 2239.54   2
  -4  -4   5 175651. 2564.25   3
  -4  -4   5 182535. 4233.80   2
  -4  -4   4 413.624 177.173   3
  -4  -4   4 377.427 329.498   1
  -4  -4   4 854.203 322.118   2
  -4  -4   3 192.155 96.7369   3
  -4  -4   3 71.6086 174.658   1
  -4  -4   3 21.3436 202.753   2
  -4  -4   2 18113.8 1417.92   2
  -4  -4   2 18474.8 1396.77   1
  -4  -4   1 2570.70 546.163   1
  -4  -4   1 2138.36 463.099   2
  -4  -4   0 9796.61 1107.17   2
  -4  -4   0 9044.94 1016.62   1
   4   4   1 2547.72 533.060   1
  -4  -4  -1 1833.02 472.595   1
  -4  -4  -2 46118.4 2272.53   1
   4   4   2 49105.0 2312.68   1
   4   4   3 2633.45 565.405   1
  -4  -4  -3 2391.78 524.570   1
   4   4   4 2384.34 539.667   1
  -4  -4  -4 3098.16 602.152   1
   4   4   5 172.530 213.598   1
  -4  -4  -5 261.573 179.344   1
   4   4   6 5901.59 893.977   1
   4   4   7-518.525 381.260   1
   4   4   8 0.64189 129.981   1
   4   4   9-117.701 314.196   1
   4   4  10 1718.25 531.233   1
   4   4  11 3295.19 761.731   1
   4   4  12 3680.86 894.138   1
   4   4  13-146.857 169.388   1
   4   4  14-65.2048 273.709   1
   4   4  15-246.172 259.715   1
  -4  -5  19 2203.06 703.838   2
  -4  -5  18-76.9268 139.419   2
  -4  -5  17 420.087 282.644   2
  -4  -5  16 305.440 191.668   2
  -4  -5  15 327.786 250.489   2
  -4  -5  14-156.615 290.873   2
  -4  -5  13 137.518 157.667   2
  -4  -5  12 12054.2 1332.18   2
  -4  -5  11 146.221 142.697   2
  -4  -5  10 13937.0 1363.32   2
  -4  -5   9 5921.93 862.935   2
  -4  -5   8 396.181 239.073   2
   4   5  -8 1168.13 399.982   2
  -4  -5   7 1601.12 441.816   2
  -4  -5   7 1481.39 199.915   3
   4   5  -7 1852.30 475.285   2
  -4  -5   6 4963.23 437.584   3
   4   5  -6 4322.05 681.964   2
  -4  -5   6 4798.92 794.498   2
  -4  -5   5 50747.0 1558.24   3
   4   5  -5 47991.4 2292.05   2
  -4  -5   4 4960.85 540.223   3
  -4  -5   4 3470.15 655.078   1
  -4  -5   4 4306.26 690.093   2
  -4  -5   3 126712. 2945.69   3
  -4  -5   3 118763. 3933.38   2
  -4  -5   2 26474.0 1485.74   3
  -4  -5   2 28815.5 1868.90   1
  -4  -5   2 27103.5 1818.96   2
  -4  -5   1 1107.28 312.203   3
  -4  -5   1 887.622 256.070   1
  -4  -5   1 805.618 266.672   2
  -4  -5   0-368.427 300.132   2
  -4  -5   0 353.094 231.995   1
  -4  -5  -1 3677.18 727.681   1
   4   5   1 2951.80 633.572   1
  -4  -5  -2 14320.9 1353.42   1
   4   5   2 15662.7 1362.12   1
  -4  -5  -3 504.225 319.752   1
   4   5   3 241.902 143.497   1
   4   5   4 2788.15 601.583   1
   4   5   5 23848.3 1783.81   1
   4   5   6 691.887 328.018   1
   4   5   7 3502.99 771.081   1
   4   5   8 11549.6 1396.51   1
   4   5   9 248.666 175.409   1
   4   5  10 349.311 378.333   1
   4   5  11 442.294 385.135   1
   4   5  12 2211.57 651.019   1
   4   5  13 211.938 337.679   1
   4   5  14-93.3209 212.081   1
  -4  -6  19 666.085 344.632   2
  -4  -6  18 1207.79 534.080   2
  -4  -6  17 197.211 129.848   2
  -4  -6  16 290.782 137.105   2
  -4  -6  15 8500.64 1231.66   2
  -4  -6  14 1887.91 560.904   2
  -4  -6  13 1621.51 454.846   2
  -4  -6  12 651.684 251.044   2
  -4  -6  11-70.5501 312.712   2
  -4  -6  10 21561.2 1715.10   2
  -4  -6   9-108.300 247.052   2
  -4  -6   8 23848.5 849.211   3
  -4  -6   8 31403.2 1966.90   2
  -4  -6   7 6271.12 500.170   3
  -4  -6   7 8087.67 1024.89   2
  -4  -6   6 3571.21 424.592   3
   4   6  -6 2901.70 571.294   2
  -4  -6   6 4104.34 765.713   2
  -4  -6   5 674.584 197.439   3
  -4  -6   5-23.8287 169.617   1
   4   6  -5 447.666 235.721   2
  -4  -6   5 931.869 378.885   2
  -4  -6   4 773.982 220.205   3
  -4  -6   4 356.431 226.825   1
  -4  -6   4 726.352 331.616   2
  -4  -6   3 22391.5 1341.18   3
  -4  -6   3 21658.7 1660.99   1
  -4  -6   3 21739.1 1621.98   2
  -4  -6   2 13761.6 1097.76   3
  -4  -6   2 14804.1 1400.41   1
  -4  -6   2 14731.2 1369.77   2
  -4  -6   1 359.176 182.096   3
  -4  -6   1 171.849 210.536   1
  -4  -6   0 2986.32 568.984   3
  -4  -6   0 2917.20 663.788   2
  -4  -6   0 3591.49 748.444   1
   4   6   1 866.542 386.104   1
  -4  -6  -1 1118.31 388.142   3
  -4  -6  -1 829.813 353.924   1
  -4  -6  -1 539.613 309.971   2
  -4  -6  -2 10380.5 1133.56   3
   4   6   2 10852.4 1249.51   1
   4   6   3 120.771 149.981   1
   4   6   4 91.4071 197.373   1
   4   6   5 1964.63 555.997   1
   4   6   6 2286.01 605.624   1
   4   6   7 2373.25 643.738   1
   4   6   8 4340.11 862.688   1
   4   6   9-252.313 272.936   1
   4   6  10 450.710 337.308   1
   4   6  11 457.288 316.785   1
   4   6  12 1879.88 653.325   1
   4   6  13 84.4640 227.955   1
   4   6  14 519.951 250.785   1
  -4  -7  19 445.240 311.437   2
  -4  -7  18 494.012 310.682   2
  -4  -7  17-130.718 233.347   2
  -4  -7  16 894.838 478.352   2
  -4  -7  15 12280.9 1508.01   2
  -4  -7  14 525.908 334.555   2
  -4  -7  13 1295.58 475.560   2
  -4  -7  12-61.9068 221.947   2
  -4  -7  11 297.154 322.652   2
  -4  -7  10 1811.25 495.040   2
  -4  -7   9 429.849 236.273   2
  -4  -7   9 551.062 138.584   3
  -4  -7   8 9225.19 636.453   3
  -4  -7   8 10971.2 1178.16   2
  -4  -7   7-275.469 277.876   2
  -4  -7   7-35.9420 49.5856   3
  -4  -7   6 11096.0 847.721   3
  -4  -7   6 12170.5 1241.70   2
  -4  -7   5 17828.9 1132.35   3
  -4  -7   5 19134.8 1563.63   2
  -4  -7   4 2309.46 419.556   3
  -4  -7   4 2051.97 528.572   2
  -4  -7   3 2233.89 428.205   3
  -4  -7   3 1476.27 484.036   2
  -4  -7   2 732.362 243.213   3
  -4  -7   2 344.998 312.196   2
  -4  -7   1 1254.81 373.138   3
  -4  -7   1 1217.49 406.211   2
  -4  -7   0 1188.66 396.992   3
  -4  -7   0 883.482 469.724   2
  -4  -7  -1 4159.52 738.970   3
  -4  -7  -1 4975.49 855.707   2
   4   7   1 4197.72 741.981   1
   4   7   2 1051.48 373.221   1
   4   7   3 1118.88 395.660   1
   4   7   4 37.2826 202.783   1
   4   7   5 239.255 291.145   1
   4   7   6 4437.93 853.516   1
   4   7   7 46.2046 266.863   1
   4   7   8 673.258 350.992   1
   4   7   9 4550.92 928.637   1
   4   7  10 46.6600 222.451   1
   4   7  11 36.3813 259.740   1
   4   7  12 3087.87 849.187   1
   4   7  13 375.270 213.568   1
  -4  -8  19 72.7273 211.288   2
  -4  -8  18 819.056 407.541   2
  -4  -8  17 642.567 414.308   2
  -4  -8  16-4.89139 289.258   2
  -4  -8  15 306.175 242.113   2
  -4  -8  14 628.318 365.658   2
  -4  -8  13 2622.18 707.382   2
  -4  -8  12 244.063 213.306   2
  -4  -8  11 16055.1 1616.86   2
  -4  -8  10 19243.9 916.090   3
  -4  -8  10 24396.5 1903.58   2
  -4  -8   9 604.303 328.698   2
  -4  -8   9 189.693 118.239   3
  -4  -8   8 423.282 241.911   2
  -4  -8   8 583.457 206.768   3
  -4  -8   7 1462.10 432.812   2
  -4  -8   7 1274.93 280.853   3
  -4  -8   6 541.137 339.070   2
  -4  -8   6 392.034 175.306   3
  -4  -8   5 1866.83 419.095   3
  -4  -8   5 1605.34 540.365   2
  -4  -8   4 35970.6 1838.71   3
  -4  -8   4 41132.9 2402.23   2
  -4  -8   3 5803.30 757.229   3
  -4  -8   3 7368.80 999.537   2
  -4  -8   2-34.6570 201.171   3
  -4  -8   2 107.920 231.956   2
  -4  -8   1 1859.48 473.240   3
  -4  -8   1 2049.81 504.247   2
  -4  -8   0 7467.83 970.432   3
  -4  -8   0 7645.85 1082.50   2
  -4  -8  -1-650.509 340.338   2
   4   8   1-131.254 273.756   1
   4   8   2 188.616 164.879   1
   4   8   3 159.410 214.569   1
   4   8   4 15421.9 1546.09   1
   4   8   5 1557.45 486.422   1
   4   8   6-88.7642 176.612   1
   4   8   7 6963.55 1114.47   1
   4   8   8 3346.59 831.399   1
   4   8   9-89.0778 246.304   1
   4   8  10 1105.33 478.183   1
   4   8  11 1592.73 636.903   1
   4   8  12 1807.81 674.295   1
  -4  -9  19 3610.18 908.753   2
  -4  -9  18 276.530 237.572   2
  -4  -9  17 306.448 120.195   2
  -4  -9  16 2605.29 691.727   2
  -4  -9  15 2354.56 661.612   2
  -4  -9  14 142.910 237.209   2
  -4  -9  13 426.859 273.935   2
  -4  -9  12 225.955 204.714   2
  -4  -9  11 7314.45 1080.47   2
  -4  -9  10 1508.38 489.357   2
  -4  -9  10 1168.78 265.706   3
  -4  -9   9 4472.47 534.635   3
  -4  -9   9 4993.79 843.452   2
  -4  -9   8 7513.06 740.195   3
  -4  -9   8 8033.83 1074.45   2
  -4  -9   7 298.289 254.592   2
  -4  -9   7-87.2653 84.9352   3
  -4  -9   6-67.8248 134.345   2
  -4  -9   6-139.512 216.069   3
  -4  -9   5 3611.34 614.190   3
  -4  -9   5 2950.05 581.019   2
  -4  -9   4 346.921 213.298   3
  -4  -9   4-362.649 356.261   2
  -4  -9   3 4494.93 713.943   3
  -4  -9   3 4861.76 853.821   2
  -4  -9   2 854.890 321.047   3
  -4  -9   2 1226.35 385.315   2
  -4  -9   1 4187.85 735.747   3
  -4  -9   1 5139.63 908.246   2
  -4  -9   0 12961.8 1437.34   2
  -4  -9  -1 10943.1 1345.18   2
   4   9   2 6421.82 993.854   1
  -4  -9  -2 6151.96 998.063   2
   4   9   3 138.394 165.045   1
   4   9   4 2567.16 654.508   1
   4   9   5 3380.99 760.118   1
   4   9   6 3720.15 872.605   1
   4   9   7-226.787 290.559   1
   4   9   8 812.985 396.832   1
   4   9   9 940.221 476.092   1
   4   9  10 4028.07 955.085   1
   4   9  11 6083.92 1186.18   1
  -4 -10  18 66.4194 238.468   2
  -4 -10  17 956.041 456.603   2
  -4 -10  16 1538.51 564.552   2
  -4 -10  15 1454.70 505.278   2
  -4 -10  14 1403.86 516.994   2
  -4 -10  13-281.606 271.939   2
  -4 -10  12 838.176 426.808   2
  -4 -10  11 376.193 218.105   2
  -4 -10  10-532.062 367.122   2
  -4 -10   9 966.030 368.170   2
  -4 -10   9 845.671 256.878   3
  -4 -10   8 2899.97 518.440   3
  -4 -10   8 2640.09 636.361   2
  -4 -10   7 161.160 121.712   2
  -4 -10   7 355.572 174.694   3
  -4 -10   6 1320.04 412.934   2
  -4 -10   6 991.995 349.611   3
  -4 -10   5 391.082 250.175   3
  -4 -10   5 332.502 175.121   2
  -4 -10   4 141.240 140.300   3
  -4 -10   4-47.5092 287.246   2
  -4 -10   3 8145.07 1038.03   3
  -4 -10   3 8254.74 1125.89   2
  -4 -10   2 724.445 307.272   3
  -4 -10   2 1044.47 396.581   2
  -4 -10   1 686.743 484.367   2
  -4 -10   0 1519.87 538.236   2
  -4 -10  -1 1845.94 523.907   2
   4  10   2 323.175 216.364   1
  -4 -10  -2 196.777 335.514   2
   4  10   3 7889.83 1166.90   1
   4  10   4 3455.29 752.708   1
   4  10   5 4897.38 935.572   1
   4  10   6 4225.37 916.704   1
   4  10   7 251.227 177.725   1
   4  10   8 38.6880 221.336   1
   4  10   9 1834.27 638.397   1
   4  10  10 230.201 274.689   1
  -4 -11  18 369.826 309.323   2
  -4 -11  17 10.2914 261.164   2
  -4 -11  16-410.806 380.503   2
  -4 -11  15-4.73866 168.905   2
  -4 -11  14 3956.80 936.402   2
  -4 -11  13-74.6710 267.098   2
  -4 -11  12-86.8261 179.628   2
  -4 -11  11 4395.80 906.832   2
  -4 -11  10-414.266 317.586   2
  -4 -11   9 1815.58 518.251   2
  -4 -11   8 4737.80 706.747   3
  -4 -11   8 6575.86 1038.74   2
  -4 -11   7 4295.68 818.317   2
  -4 -11   7 4100.54 697.181   3
  -4 -11   6 16642.4 1407.28   3
  -4 -11   6 19475.6 1778.70   2
  -4 -11   5 287.184 240.664   3
  -4 -11   5 425.684 143.245   2
  -4 -11   4 9.40719 180.068   3
  -4 -11   4-236.131 281.130   2
  -4 -11   3 1001.96 371.249   2
  -4 -11   2 26520.5 2169.06   2
  -4 -11   1 9963.08 1378.60   2
  -4 -11   0 1238.47 465.386   2
  -4 -11  -1 164.390 316.879   2
  -4 -11  -2 1060.88 426.988   2
   4  11   3 622.742 404.862   1
  -4 -11  -3 55.0094 251.790   2
   4  11   4 696.883 399.831   1
   4  11   5 2549.20 705.834   1
   4  11   6 6238.45 1133.06   1
   4  11   7 189.466 129.050   1
   4  11   8 4251.04 1002.58   1
   4  11   9-156.005 308.746   1
  -4 -12  17 2025.43 688.165   2
  -4 -12  16 277.389 213.647   2
  -4 -12  15 162.778 216.436   2
  -4 -12  14 601.326 374.169   2
  -4 -12  13 2171.26 707.056   2
  -4 -12  12 130.260 186.145   2
  -4 -12  11 1755.42 611.498   2
  -4 -12  10 1897.50 603.293   2
  -4 -12   9 101.317 138.680   2
  -4 -12   8-227.455 238.014   2
  -4 -12   7 1036.13 408.719   2
  -4 -12   6 1526.93 555.341   2
  -4 -12   5 26966.8 2119.31   2
  -4 -12   4-363.672 286.317   2
  -4 -12   3 1057.32 479.639   2
  -4 -12   2 4583.77 913.766   2
  -4 -12   1 80.3395 310.584   2
  -4 -12   0 7963.09 1259.16   2
  -4 -12  -1 4608.64 970.736   2
  -4 -12  -2 5446.60 1046.69   2
   4  12   3 2349.13 662.652   1
  -4 -12  -3 1314.37 527.825   2
   4  12   4 536.424 320.387   1
   4  12   5 559.258 309.200   1
   4  12   6 242.940 283.431   1
   4  12   7 527.171 307.990   1
  -4 -13  17 2728.23 817.939   2
  -4 -13  16 1169.53 513.594   2
  -4 -13  15 678.003 445.969   2
  -4 -13  14 1319.30 646.485   2
  -4 -13  13 434.928 335.239   2
  -4 -13  12 455.938 353.995   2
  -4 -13  11 1443.82 554.002   2
  -4 -13  10 1226.39 522.068   2
  -4 -13   9 74.3221 231.305   2
  -4 -13   8 313.630 272.467   2
  -4 -13   7 2560.98 695.217   2
  -4 -13   6 986.591 438.892   2
  -4 -13   5 1857.62 549.199   2
  -4 -13   4 14.9818 132.267   2
  -4 -13   3 317.258 292.693   2
  -4 -13   2 475.049 262.578   2
  -4 -13   1 127.158 155.676   2
  -4 -13   0-359.190 302.401   2
  -4 -13  -1 1241.04 564.979   2
  -4 -13  -2 6163.30 1151.83   2
  -4 -13  -3 648.384 402.424   2
   4  13   4 673.551 344.829   1
  -4 -13  -4 499.753 225.873   2
   4  13   5 574.737 352.387   1
   4  13   6 254.627 333.183   1
  -4 -14  16 1673.37 717.280   2
  -4 -14  15 79.1281 249.769   2
  -4 -14  14 330.407 188.323   2
  -4 -14  13 732.488 449.064   2
  -4 -14  12 342.983 350.993   2
  -4 -14  11 1811.25 677.854   2
  -4 -14  10 2978.75 773.225   2
  -4 -14   9 1464.99 566.691   2
  -4 -14   8 472.480 371.599   2
  -4 -14   7-100.098 206.592   2
  -4 -14   6 102.601 164.754   2
  -4 -14   5 2276.93 662.008   2
  -4 -14   4 397.089 395.117   2
  -4 -14   3 3096.18 823.462   2
  -4 -14   2 1146.98 469.913   2
  -4 -14   1 1870.58 690.803   2
  -4 -14   0 2304.70 721.914   2
  -4 -14  -1 125.233 215.246   2
  -4 -14  -2 300.863 266.129   2
  -4 -14  -3 473.233 342.074   2
  -4 -14  -4 1593.34 629.743   2
  -4 -14  -5 1170.16 470.206   2
  -4 -15  15 1839.76 739.292   2
  -4 -15  14-386.552 339.839   2
  -4 -15  13 1401.29 643.755   2
  -4 -15  12 903.642 464.036   2
  -4 -15  11 666.834 436.978   2
  -4 -15  10 380.676 150.278   2
  -4 -15   9 1294.59 549.957   2
  -4 -15   8 5571.38 1078.25   2
  -4 -15   7-300.577 232.553   2
  -4 -15   6-101.618 253.716   2
  -4 -15   5-393.967 320.580   2
  -4 -15   4-14.8426 339.962   2
  -4 -15   3 1753.09 578.390   2
  -4 -15   2 333.162 450.885   2
  -4 -15   1 2821.38 794.421   2
  -4 -15   0 369.461 420.396   2
  -4 -15  -1 1610.86 643.256   2
  -4 -15  -2 1611.97 690.951   2
  -4 -15  -3 446.804 384.274   2
  -4 -15  -4-118.992 352.279   2
  -4 -15  -5 631.802 633.017   2
  -4 -16  13-445.958 364.994   2
  -4 -16  12 965.236 525.589   2
  -4 -16  11 1323.84 608.495   2
  -4 -16  10 2748.26 816.360   2
  -4 -16   9 2585.15 851.283   2
  -4 -16   8 8553.41 1362.48   2
  -4 -16   7 843.131 419.127   2
  -4 -16   6-157.536 248.757   2
  -4 -16   5-19.5096 302.744   2
  -4 -16   4 384.269 322.326   2
  -4 -16   3-169.282 236.705   2
  -4 -16   2-274.844 354.626   2
  -4 -16   1 12.5169 255.503   2
  -4 -16   0 177.365 307.948   2
  -4 -16  -1 1101.99 572.832   2
  -4 -16  -2-86.0879 222.085   2
  -4 -16  -3 154.451 249.375   2
  -4 -17   9 339.340 477.180   2
  -4 -17   8-224.906 287.378   2
  -4 -17   7 1720.44 687.872   2
  -4 -17   6 1380.98 529.818   2
  -4 -17   5 3955.85 1009.16   2
  -4 -17   4 5086.87 1174.42   2
  -4 -17   3 1675.23 659.185   2
  -4 -17   2-93.7009 278.485   2
  -4 -17   1 142.567 177.661   2
  -4 -17   0-571.395 409.263   2
  -4 -17  -1 112.847 416.843   2
  -5  19   0-523.315 414.391   3
  -5  19  -1 549.823 268.148   3
  -5  19  -2 768.258 497.103   3
  -5  18   6 793.495 451.236   3
  -5  18   5-203.023 290.729   3
  -5  18   4-301.077 270.969   3
  -5  18   3 67.0933 168.384   3
  -5  18   2 3195.95 777.726   3
  -5  18   1 1990.57 700.937   3
  -5  18   0 2703.61 717.166   3
  -5  18  -1 1074.94 542.455   3
  -5  18  -2 692.061 422.655   3
  -5  18  -3 1424.14 658.858   3
  -5  18  -4-392.792 343.972   3
  -5  18  -5 33.6738 263.969   3
  -5  18  -6 364.849 301.633   3
  -5  18  -7 623.121 456.186   3
  -5  17   9 992.175 482.161   3
  -5  17   8 698.708 467.578   3
  -5  17   7 7687.31 1294.03   3
  -5  17   6 1403.74 590.495   3
  -5  17   5 3176.85 785.916   3
  -5  17   4 415.112 249.227   3
  -5  17   3 1913.52 590.420   3
  -5  17   2 721.505 390.592   3
  -5  17   1-94.9299 184.751   3
  -5  17   0 4224.23 905.968   3
  -5  17  -1 2040.86 771.595   3
  -5  17  -2 339.327 266.991   3
  -5  17  -3 2065.39 703.419   3
  -5  17  -4 182.850 238.669   3
  -5  17  -5 2720.43 807.767   3
  -5  17  -6 1165.54 515.327   3
  -5  17  -7 4115.66 1020.96   3
  -5  17  -8 972.618 581.671   3
  -5  17  -9-21.7363 260.577   3
  -5  16  10 163.566 294.358   3
  -5  16   9 3469.54 913.840   3
  -5  16   8 1771.54 660.299   3
  -5  16   7 953.598 502.441   3
  -5  16   6 15.7097 148.236   3
  -5  16   6 77.0016 111.315   1
  -5  16   5 3759.44 842.104   3
  -5  16   4 804.132 409.758   3
  -5  16   3 1116.20 433.574   3
  -5  16   2 611.591 316.144   3
  -5  16   1 1288.69 409.959   3
  -5  16   0 737.269 446.090   3
  -5  16  -1 1012.10 448.817   3
  -5  16  -2-143.255 154.032   3
  -5  16  -3 1982.24 681.722   3
  -5  16  -4 111.561 345.683   3
  -5  16  -5 2963.68 799.978   3
  -5  16  -6 1696.80 597.311   3
  -5  16  -7 4231.53 960.028   3
  -5  16  -8 517.558 492.521   3
  -5  16  -9 152.187 293.110   3
  -5  16 -10 156.152 205.463   3
  -5  16 -11 11.0797 208.624   3
  -5  15  13 2080.01 642.510   1
  -5  15  12 1651.41 575.492   1
  -5  15  11 132.506 174.454   1
  -5  15  10 5482.99 1093.81   3
  -5  15  10 4161.89 793.128   1
  -5  15   9 4236.41 758.197   1
  -5  15   9 4353.14 962.528   3
  -5  15   8 3296.68 651.718   1
  -5  15   8 4089.25 897.562   3
  -5  15   7 1040.68 468.664   3
  -5  15   7 635.679 293.491   1
  -5  15   6 3359.00 789.592   3
  -5  15   6 3327.03 586.961   1
  -5  15   5 873.835 432.555   3
  -5  15   5 525.476 253.876   1
  -5  15   4 1507.03 540.689   3
  -5  15   3 456.806 152.101   3
  -5  15   2 338.846 265.072   3
  -5  15   1 1317.12 470.346   3
  -5  15   0 557.942 294.587   3
  -5  15  -1 527.981 323.867   3
  -5  15  -2 15968.5 1724.89   3
  -5  15  -3 6053.46 1100.21   3
  -5  15  -4 1805.38 598.339   3
  -5  15  -5 709.737 358.336   3
  -5  15  -6 228.541 363.508   3
  -5  15  -7 931.451 481.840   3
  -5  15  -8 1248.77 509.508   3
  -5  15  -9 1494.59 522.549   3
  -5  15 -10 142.441 207.726   3
  -5  15 -11 993.087 402.503   3
  -5  15 -12-404.325 492.369   3
  -5  14  15 4579.15 1037.85   1
  -5  14  14 840.222 431.580   1
  -5  14  13 4499.61 913.067   1
  -5  14  12 161.419 280.927   1
  -5  14  11-92.6583 176.885   1
  -5  14  10 4283.58 804.632   1
  -5  14  10 4736.31 971.243   3
  -5  14   9 261.298 240.483   1
  -5  14   9 84.3995 304.232   3
  -5  14   8 1215.71 473.064   3
  -5  14   8 429.760 175.033   1
  -5  14   7 325.501 374.963   3
  -5  14   7 364.922 252.217   1
  -5  14   6 7270.75 1090.30   3
  -5  14   6 5853.26 780.111   1
  -5  14   5 3943.92 810.281   3
  -5  14   5 2684.91 504.903   1
  -5  14   4 311.921 160.079   1
  -5  14   4 689.475 411.057   3
  -5  14   3-13.7448 136.450   3
  -5  14   2 80.9511 152.206   3
   5 -14  -1 1243.28 275.643   1
  -5  14   1 488.850 288.547   3
   5 -14   0 1617.92 286.005   1
  -5  14   0 2665.06 693.508   3
  -5  14  -1 711.760 414.770   3
  -5  14  -2 346.163 307.085   3
  -5  14  -3 15221.7 1646.48   3
  -5  14  -4 9751.08 1343.37   3
  -5  14  -5 373.513 415.505   3
  -5  14  -6 1175.47 555.037   3
  -5  14  -7 1779.71 591.951   3
  -5  14  -8 2761.39 770.487   3
  -5  14  -9 878.366 391.841   3
  -5  14 -10 3789.50 865.122   3
  -5  14 -11 122.802 271.156   3
  -5  14 -12 380.120 341.988   3
  -5  14 -13 2240.41 686.742   3
  -5  13  16 3187.61 836.968   1
  -5  13  15 2954.24 862.077   1
  -5  13  14 2276.71 659.632   1
  -5  13  13 4805.25 921.890   1
  -5  13  12 1103.52 444.432   1
  -5  13  11 2775.91 658.132   1
  -5  13  10 668.422 371.754   3
  -5  13  10 238.245 216.597   1
  -5  13   9 524.536 328.516   3
  -5  13   9 195.405 200.541   1
  -5  13   8 1523.02 518.871   3
  -5  13   8 512.177 243.555   1
  -5  13   7-38.6807 205.759   3
  -5  13   7 98.7652 91.1860   1
  -5  13   6 2912.78 677.375   3
  -5  13   6 2318.19 475.992   1
  -5  13   5 131.475 164.556   1
   5 -13  -5-54.2559 68.6522   2
  -5  13   4 29.3585 229.848   3
   5 -13  -4 89.1389 63.3547   2
  -5  13   4 145.499 142.707   1
  -5  13   3 4330.01 772.380   3
  -5  13   2 1036.62 484.182   3
  -5  13   1 21503.5 1846.51   3
  -5  13   0 11669.8 1472.38   3
   5 -13   0 1047.28 269.006   1
   5 -13   1 237.464 88.2612   1
  -5  13  -1 749.941 352.971   3
   5 -13   2 37.9426 40.7122   1
  -5  13  -2-111.307 198.297   3
  -5  13  -3 602.336 373.311   3
   5 -13   3 362.574 103.906   1
   5 -13   4 3851.94 367.487   1
  -5  13  -4 4910.84 903.366   3
  -5  13  -5 483.644 362.911   3
  -5  13  -6 1921.85 565.414   3
   5 -13   6 1682.50 297.685   1
  -5  13  -7 963.191 367.543   3
   5 -13   7 924.273 260.845   1
  -5  13  -8 3881.95 838.787   3
  -5  13  -9 16181.0 1795.73   3
  -5  13 -10 411.170 374.293   3
  -5  13 -11 1203.88 519.118   3
  -5  13 -12 250.248 239.016   3
  -5  13 -13 1655.05 622.341   3
  -5  13 -14 350.755 342.178   3
  -5  12  17-624.113 377.975   1
  -5  12  16 1541.21 566.418   1
  -5  12  15 3213.14 802.580   1
  -5  12  14 256.409 234.190   1
  -5  12  13 634.065 463.563   1
  -5  12  12 609.023 365.297   1
  -5  12  11 23.6843 133.411   3
  -5  12  11-68.7142 214.567   1
  -5  12  10 501.964 329.494   3
  -5  12  10 93.7355 94.8224   1
  -5  12   9 4602.82 888.501   3
  -5  12   9 2849.17 583.802   1
  -5  12   8 1185.23 436.692   3
  -5  12   8 636.924 261.796   1
  -5  12   7 1256.71 413.800   3
  -5  12   7 1091.77 336.468   1
  -5  12   6 5042.38 842.690   3
  -5  12   6 4265.15 628.696   1
  -5  12   5 4607.84 596.712   1
  -5  12   5 4519.72 779.419   3
   5 -12  -5 3101.25 421.693   2
  -5  12   4 14244.6 1427.61   3
  -5  12   4 14287.1 926.086   1
  -5  12   3 10098.7 1240.64   3
  -5  12   2 2858.02 706.823   3
  -5  12   1 5651.77 927.078   3
  -5  12   0 27180.6 2034.78   3
  -5  12  -1 13534.5 1388.11   3
  -5  12  -2 8987.74 1176.26   3
  -5  12  -3 25299.2 2007.57   3
   5 -12   4 2858.43 267.200   1
  -5  12  -4 2874.04 850.043   3
   5 -12   4 2796.50 279.882   1
   5 -12   5 235.386 97.5562   1
   5 -12   5 173.922 77.8706   1
  -5  12  -5 202.531 269.605   3
   5 -12   6 183.447 95.7855   1
   5 -12   6 10.7207 48.8499   1
  -5  12  -6 91.2765 56.7300   2
  -5  12  -6 22.0813 302.935   3
  -5  12  -6 42.9329 39.4879   2
   5 -12   7 281.252 112.817   1
  -5  12  -7-61.1019 245.250   3
  -5  12  -8 13444.1 1564.58   3
   5 -12   8 14555.6 1027.64   1
   5 -12   9 436.095 221.097   1
  -5  12  -9 523.062 461.710   3
  -5  12 -10 14061.7 1676.38   3
   5 -12  10 15280.6 1249.71   1
  -5  12 -11 1778.14 677.116   3
  -5  12 -12 143.127 287.090   3
  -5  12 -13-338.649 259.252   3
  -5  12 -14 146.992 228.238   3
  -5  11  17 757.840 487.925   1
  -5  11  16 695.421 341.988   1
  -5  11  15 1317.76 514.425   1
  -5  11  14 2360.32 638.260   1
  -5  11  13-117.909 190.980   1
  -5  11  12 2265.02 568.334   1
  -5  11  11 3892.28 804.051   3
  -5  11  11 2491.65 586.584   1
  -5  11  10 2196.17 512.988   1
  -5  11  10 3909.39 812.547   3
  -5  11   9 8151.20 1099.33   3
  -5  11   9 7269.56 897.680   1
   5 -11  -9 8501.05 993.098   2
  -5  11   8 10882.3 1246.42   3
  -5  11   8 9911.12 990.766   1
   5 -11  -8 11148.8 1048.75   2
  -5  11   7 2023.52 571.323   3
  -5  11   7 1204.79 344.368   1
  -5  11   6 1545.28 432.099   3
  -5  11   6 1780.87 388.473   1
   5 -11  -6 430.533 209.187   2
  -5  11   5 3859.69 704.648   3
   5 -11  -5 3137.65 429.655   2
  -5  11   5 4181.47 532.056   1
  -5  11   4 47711.4 2438.19   3
  -5  11   4 44137.0 1536.23   1
   5 -11  -3 969.055 294.853   2
  -5  11   3 3571.40 446.534   1
  -5  11   2-290.766 272.760   3
  -5  11   1 330.751 193.372   3
  -5  11   0 2551.28 626.259   3
  -5  11  -1 1772.89 604.854   3
  -5  11  -2 1425.23 540.943   3
  -5  11  -3 29509.2 2092.28   3
  -5  11  -4 1315.19 162.846   2
  -5  11  -4 1491.63 665.986   3
  -5  11  -4 1237.83 144.612   2
  -5  11  -5 7511.09 1102.27   3
  -5  11  -5 7369.83 481.350   2
  -5  11  -5 7018.51 458.151   2
   5 -11   5 6696.42 442.273   1
   5 -11   6 302.463 155.901   1
   5 -11   6 252.679 131.952   1
  -5  11  -6 127.488 89.1356   2
  -5  11  -6 368.760 140.064   3
   5 -11   7 2001.36 336.294   1
  -5  11  -7 2130.05 317.035   2
  -5  11  -7 2305.67 629.880   3
   5 -11   8 217.039 126.808   1
  -5  11  -8 10.2258 181.790   3
   5 -11   9-40.9810 63.7156   1
  -5  11  -9-280.612 298.536   3
   5 -11  10 249.769 167.130   1
  -5  11 -10-311.936 239.250   3
   5 -11  11 1263.10 386.732   1
  -5  11 -11 1776.44 706.947   3
   5 -11  12-83.7633 198.441   1
  -5  11 -12 230.127 294.355   3
  -5  11 -13 3979.04 932.771   3
  -5  11 -14 2053.21 676.576   3
  -5  11 -15 4544.47 1039.31   3
  -5  10  18 2258.58 718.668   1
  -5  10  17 410.255 221.092   1
  -5  10  16 142.648 254.209   1
  -5  10  15 749.495 367.342   1
  -5  10  14 66.5356 184.103   1
  -5  10  13-32.5966 143.835   1
  -5  10  12 2572.11 602.710   1
  -5  10  11 832.918 391.067   3
  -5  10  11 452.463 316.168   1
  -5  10  10 6462.12 866.580   1
  -5  10  10 6364.06 809.782   2
   5 -10 -10 8101.07 1021.57   2
  -5  10  10 9036.04 1146.53   3
   5 -10  -9 1228.02 360.868   2
  -5  10   9 1017.61 364.469   3
  -5  10   9 1052.46 324.982   2
  -5  10   9 1087.61 347.935   1
  -5  10   8 3238.20 560.090   1
  -5  10   8 4024.82 712.913   3
  -5  10   8 3257.78 520.708   2
   5 -10  -8 3054.20 552.283   2
  -5  10   7 39548.6 2202.17   3
  -5  10   7 35104.0 1668.51   1
  -5  10   6 3184.03 651.664   3
  -5  10   6 3085.89 525.996   1
  -5  10   6 2505.36 418.710   2
  -5  10   5 13001.0 1254.30   3
  -5  10   5 11201.8 800.723   2
  -5  10   5 12490.7 883.081   1
   5 -10  -5 9855.84 797.125   2
  -5  10   4 20795.4 1016.74   2
   5 -10  -4 18771.9 1022.09   2
  -5  10   3 6190.96 1031.92   3
  -5  10   3 5130.53 474.478   2
  -5  10   3 4946.98 403.967   1
   5 -10  -3 3687.95 423.323   2
  -5  10   2 33171.1 2066.30   3
  -5  10   2 27860.1 923.962   2
  -5  10   1 7507.52 1243.88   3
  -5  10   1 1913.48 214.207   2
  -5  10   0 24889.9 621.794   2
  -5  10   0 34031.2 2085.92   3
  -5  10  -1 2006.14 188.284   2
  -5  10  -1 7175.75 1332.48   3
  -5  10  -2 3524.35 709.684   3
  -5  10  -2 2766.09 231.253   2
  -5  10  -2 2501.29 221.389   2
  -5  10  -3 7199.45 437.569   2
  -5  10  -3 7054.58 423.075   2
  -5  10  -4 74.5440 142.349   3
  -5  10  -4 547.490 151.582   2
  -5  10  -4 394.016 141.873   2
  -5  10  -5 2113.59 292.577   2
  -5  10  -5 2687.02 618.691   3
  -5  10  -5 2085.45 305.470   2
   5 -10   5 1251.45 194.552   1
   5 -10   5 1565.12 206.186   1
  -5  10  -6 6208.27 572.622   2
  -5  10  -6 6804.97 1030.98   3
   5 -10   6 5401.05 480.235   1
  -5  10  -7 5664.35 605.731   2
  -5  10  -7 5900.57 1010.25   3
   5 -10   7 6213.11 592.506   1
  -5  10  -8 3171.64 495.393   2
  -5  10  -8 3189.97 734.706   3
   5 -10   8 3365.79 490.737   1
   5 -10   9 1175.44 305.922   1
  -5  10  -9 1664.99 589.189   3
  -5  10  -9 1353.09 334.750   2
   5 -10  10 307.687 151.275   1
  -5  10 -10 725.657 351.522   3
   5 -10  11-82.8022 166.058   1
  -5  10 -11-157.015 330.830   3
  -5  10 -12 6319.12 1098.22   3
   5 -10  12 4690.45 777.240   1
   5 -10  13 2038.02 549.834   1
  -5  10 -13 2573.03 731.382   3
  -5  10 -14 3684.84 888.963   3
  -5  10 -15 3125.02 870.778   3
  -5   9  18-67.5997 141.579   1
  -5   9  17 535.351 314.962   1
  -5   9  16 72.5696 205.412   1
  -5   9  15 1287.15 501.109   1
  -5   9  14 297.531 201.593   1
  -5   9  13-95.7734 185.120   1
  -5   9  13-71.5217 105.404   2
  -5   9  12 16.3620 159.576   1
  -5   9  12 114.504 142.700   2
  -5   9  11 435.662 244.650   1
  -5   9  11 420.603 231.586   2
  -5   9  10 383.767 206.402   3
   5  -9 -10 481.012 282.311   2
  -5   9  10 541.801 259.754   1
  -5   9  10 328.269 128.431   2
   5  -9  -9 866.205 331.388   2
  -5   9   9 1201.05 439.409   3
  -5   9   9 1127.20 390.001   2
  -5   9   9 1025.57 354.518   1
   5  -9  -8 807.247 300.875   2
  -5   9   8 1337.15 417.470   3
   5  -9  -8 1401.31 439.129   3
  -5   9   8 698.384 209.058   2
  -5   9   8 1006.06 306.754   1
  -5   9   7 29769.9 1470.39   1
   5  -9  -7 30665.7 2023.35   3
  -5   9   7 31196.5 1566.45   2
  -5   9   6 41711.5 2145.42   3
  -5   9   6 38387.6 1556.80   1
   5  -9  -6 33291.4 2089.67   3
  -5   9   6 36447.9 1607.86   2
  -5   9   5 32165.2 1854.56   3
  -5   9   5 25962.6 1261.01   2
   5  -9  -5 25332.0 1809.34   3
  -5   9   5 29522.5 1270.70   1
   5  -9  -5 22907.3 1269.33   2
  -5   9   4 10763.2 1117.56   3
  -5   9   4 7405.44 622.113   2
   5  -9  -4 7237.57 965.981   3
   5  -9  -4 8702.88 733.953   2
  -5   9   4 9550.76 650.753   1
  -5   9   3 448.203 267.574   3
  -5   9   3 571.235 227.334   2
   5  -9  -3 673.363 316.423   3
   5  -9  -3 475.799 144.486   2
  -5   9   3 423.999 117.811   1
  -5   9   2 4354.67 416.893   2
  -5   9   2 4236.25 671.320   3
   5  -9  -2 3251.80 640.992   3
  -5   9   1 2137.79 256.638   2
  -5   9   1 2190.90 519.071   3
   5  -9  -1 1585.56 475.069   3
  -5   9   0 5831.44 861.573   3
   5  -9   0 5270.00 824.735   3
  -5   9   0 5693.44 424.866   2
  -5   9  -1 9624.89 1138.61   3
  -5   9  -1 8712.50 507.719   2
  -5   9  -2 22297.6 1726.55   3
  -5   9  -2 19559.1 793.877   2
  -5   9  -3-84.3976 320.611   3
  -5   9  -3 269.769 140.247   2
  -5   9  -4 3944.78 747.958   3
  -5   9  -4 4787.78 488.130   2
   5  -9   5 3401.37 314.959   1
  -5   9  -5 5309.48 883.541   3
  -5   9  -5 4477.04 470.033   2
  -5   9  -6 109.441 145.167   3
   5  -9   6 116.620 110.665   1
  -5   9  -6-4.08848 108.353   2
  -5   9  -7 15268.9 1539.76   3
  -5   9  -7 14973.7 1045.85   2
   5  -9   7 12206.7 843.737   1
  -5   9  -8 2634.37 657.021   3
  -5   9  -8 2577.21 471.027   2
   5  -9   8 2397.73 427.773   1
  -5   9  -9 13439.9 1096.78   2
   5  -9   9 11550.4 997.315   1
  -5   9 -10 7768.03 881.920   2
  -5   9 -10 8306.79 1224.05   3
   5  -9  10 6508.56 808.497   1
   5  -9  11 565.058 274.398   1
  -5   9 -11 605.976 379.030   3
   5  -9  12 39.9858 94.5751   1
  -5   9 -12 200.699 202.751   3
   5  -9  13 1138.26 449.893   1
  -5   9 -13 2355.79 692.007   3
   5  -9  14 1321.90 401.158   1
  -5   9 -14 2311.55 680.985   3
   5  -9  15 71.5653 186.632   1
  -5   9 -15 254.548 187.394   3
  -5   8  18-411.054 292.632   1
  -5   8  17 1143.82 409.945   1
  -5   8  16 31.8880 173.142   1
  -5   8  15-228.708 253.281   1
  -5   8  15 99.0485 184.428   2
  -5   8  14-217.472 230.135   1
  -5   8  14 169.040 221.382   2
  -5   8  13 4001.83 734.142   2
  -5   8  13 5292.45 880.444   1
  -5   8  12 13682.4 1334.83   2
  -5   8  12 14814.1 1403.43   1
   5  -8 -11 2034.50 559.030   3
  -5   8  11 1998.49 506.479   1
  -5   8  11 1692.22 446.344   2
  -5   8  10 45951.6 2364.21   3
   5  -8 -10 45273.5 2432.39   3
  -5   8  10 32592.8 1889.72   2
   5  -8 -10 42245.6 2292.06   2
  -5   8  10 35264.0 1936.31   1
   5  -8  -9 412.289 264.245   2
  -5   8   9 196.683 244.920   3
   5  -8  -9 9.70912 78.9260   3
  -5   8   9 198.701 202.134   1
  -5   8   9 72.6373 183.171   2
   5  -8  -8 91.5460 128.916   2
  -5   8   8 130.521 114.261   3
   5  -8  -8 129.890 172.145   3
  -5   8   8 403.800 267.965   1
  -5   8   8 14.6223 137.708   2
  -5   8   7 31946.9 1514.53   1
[truncated: 439,384 more chars]
